# Supplementary material for: Harnessing the Intrinsic Photochemistry of Isoxazoles for the Development of Chemoproteomic Crosslinking Methods
Source: bioRxiv preprint, doi:10.1101/2021.12.23.473999, version 1 (2021-12-23)
Supplement: SFX_Proteomics_Data [file 473999_file04.xlsx]

## Sheet: Raw Data
	Protein IDs	Majority protein IDs	Peptide counts (all)	Peptide counts (razor+unique)	Peptide counts (unique)	Fasta headers	Number of proteins	Peptides	Razor + unique peptides	Unique peptides	Peptides 1	Peptides 2	Peptides 3	Peptides 4	Peptides 5	Peptides 6	Peptides 7	Razor + unique peptides 1	Razor + unique peptides 2	Razor + unique peptides 3	Razor + unique peptides 4	Razor + unique peptides 5	Razor + unique peptides 6	Razor + unique peptides 7	Unique peptides 1	Unique peptides 2	Unique peptides 3	Unique peptides 4	Unique peptides 5	Unique peptides 6	Unique peptides 7	Sequence coverage [%]	Unique + razor sequence coverage [%]	Unique sequence coverage [%]	Mol. weight [kDa]	Sequence length	Sequence lengths	Q-value	Score	Ratio H/L	Ratio H/L normalized	Ratio H/L variability [%]	Ratio H/L count	Ratio H/L iso-count	Ratio H/L type	Ratio H/L 1	Ratio H/L 2	Ratio H/L 3	Ratio H/L 4
67	sp|A0A024RBG1|NUD4B_HUMAN;sp|Q9NZJ9|NUDT4_HUMAN	sp|A0A024RBG1|NUD4B_HUMAN;sp|Q9NZJ9|NUDT4_HUMAN	2;1	2;1	2;1	sp|A0A024RBG1|NUD4B_HUMAN Diphosphoinositol polyphosphate phosphohydrolase NUDT4B OS=Homo sapiens OX=9606 GN=NUDT4B PE=3 SV=1;sp|Q9NZJ9|NUDT4_HUMAN Diphosphoinositol polyphosphate phosphohydrolase 2 OS=Homo sapiens OX=9606 GN=NUDT4 PE=1 SV=2	2	2	2	2	0	0	1	1	2	1	0	0	0	1	1	2	1	0	0	0	1	1	2	1	0	14.4	14.4	14.4	20.434	181	181;180	0	3.3922	2.2495	1.3456	73.571	4	1	Median			0.82043	2.6212
69	sp|A0AVT1|UBA6_HUMAN	sp|A0AVT1|UBA6_HUMAN	5	5	5	sp|A0AVT1|UBA6_HUMAN Ubiquitin-like modifier-activating enzyme 6 OS=Homo sapiens OX=9606 GN=UBA6 PE=1 SV=1	1	5	5	5	2	1	2	2	2	2	1	2	1	2	2	2	2	1	2	1	2	2	2	2	1	5.5	5.5	5.5	117.97	1052	1052	0	9.0049	2.5383	1.0698	89.369	12	4	Leave out requantified	1.2067	0.52451	1.3658	0.64093
70	sp|A0FGR8|ESYT2_HUMAN	sp|A0FGR8|ESYT2_HUMAN	10	10	10	sp|A0FGR8|ESYT2_HUMAN Extended synaptotagmin-2 OS=Homo sapiens OX=9606 GN=ESYT2 PE=1 SV=1	1	10	10	10	3	2	4	0	4	5	4	3	2	4	0	4	5	4	3	2	4	0	4	5	4	14	14	14	102.36	921	921	0	20.743	1.394	0.63603	50.141	21	15	Leave out requantified	0.86835	1.1064	1.3365
71	sp|A1L0T0|HACL2_HUMAN	sp|A1L0T0|HACL2_HUMAN	2	2	2	sp|A1L0T0|HACL2_HUMAN 2-hydroxyacyl-CoA lyase 2 OS=Homo sapiens OX=9606 GN=ILVBL PE=1 SV=2	1	2	2	2	2	1	2	2	2	1	1	2	1	2	2	2	1	1	2	1	2	2	2	1	1	3.6	3.6	3.6	67.867	632	632	0	2.888	2.0357	0.87164	1.4002	11	5	Leave out requantified	2.0085	2.6747	2.6951	1.9675
72	sp|H0Y7S4|PRA26_HUMAN;sp|Q5VXH4|PRAM6_HUMAN;sp|Q5TYX0|PRAM5_HUMAN;sp|Q5VWM5|PRAM9_HUMAN;sp|O60813|PRA11_HUMAN;sp|O60810|PRAM4_HUMAN;sp|A6NGN4|PRA25_HUMAN;sp|A3QJZ7|PRA27_HUMAN	sp|H0Y7S4|PRA26_HUMAN;sp|Q5VXH4|PRAM6_HUMAN;sp|Q5TYX0|PRAM5_HUMAN;sp|Q5VWM5|PRAM9_HUMAN;sp|O60813|PRA11_HUMAN;sp|O60810|PRAM4_HUMAN;sp|A6NGN4|PRA25_HUMAN;sp|A3QJZ7|PRA27_HUMAN	1;1;1;1;1;1;1;1	1;1;1;1;1;1;1;1	1;1;1;1;1;1;1;1	sp|H0Y7S4|PRA26_HUMAN Putative PRAME family member 26 OS=Homo sapiens OX=9606 GN=PRAMEF26 PE=5 SV=2;sp|Q5VXH4|PRAM6_HUMAN PRAME family member 6 OS=Homo sapiens OX=9606 GN=PRAMEF6 PE=2 SV=1;sp|Q5TYX0|PRAM5_HUMAN PRAME family member 5 OS=Homo sapiens OX=9606	8	1	1	1	1	0	0	0	0	1	1	1	0	0	0	0	1	1	1	0	0	0	0	1	1	1.8	1.8	1.8	44.302	382	382;476;476;478;478;478;478;478	1	-2	2.9375	1.3936	13.177	3	0	Median	2.9375
73	sp|A4FU69|EFCB5_HUMAN	sp|A4FU69|EFCB5_HUMAN	1	1	1	sp|A4FU69|EFCB5_HUMAN EF-hand calcium-binding domain-containing protein 5 OS=Homo sapiens OX=9606 GN=EFCAB5 PE=1 SV=3	1	1	1	1	1	1	0	0	1	1	0	1	1	0	0	1	1	0	1	1	0	0	1	1	0	0.5	0.5	0.5	173.4	1503	1503	0.0096411	0.99242	3.2553	2.3435	18.009	5	0	Linear	3.8494	3.2576
74	sp|A5YKK6|CNOT1_HUMAN	sp|A5YKK6|CNOT1_HUMAN	4	4	4	sp|A5YKK6|CNOT1_HUMAN CCR4-NOT transcription complex subunit 1 OS=Homo sapiens OX=9606 GN=CNOT1 PE=1 SV=2	1	4	4	4	1	1	2	1	0	0	2	1	1	2	1	0	0	2	1	1	2	1	0	0	2	1.8	1.8	1.8	266.94	2376	2376	0	3.5983	0.22205	0.099991	104.95	6	6	Median	0.58734	0.22029	0.11619	0.13359
75	sp|A6NDG6|PGP_HUMAN	sp|A6NDG6|PGP_HUMAN	2	2	2	sp|A6NDG6|PGP_HUMAN Glycerol-3-phosphate phosphatase OS=Homo sapiens OX=9606 GN=PGP PE=1 SV=1	1	2	2	2	2	1	2	2	2	1	1	2	1	2	2	2	1	1	2	1	2	2	2	1	1	7.8	7.8	7.8	34.006	321	321	0	6.0398	2.2842	0.88733	130.03	11	10	Median	0.69881	3.2016	0.70572	0.7814
77	sp|P62308|RUXG_HUMAN;sp|A8MWD9|RUXGL_HUMAN	sp|P62308|RUXG_HUMAN;sp|A8MWD9|RUXGL_HUMAN	3;3	3;3	3;3	sp|P62308|RUXG_HUMAN Small nuclear ribonucleoprotein G OS=Homo sapiens OX=9606 GN=SNRPG PE=1 SV=1;sp|A8MWD9|RUXGL_HUMAN Putative small nuclear ribonucleoprotein G-like protein 15 OS=Homo sapiens OX=9606 GN=SNRPGP15 PE=5 SV=2	2	3	3	3	3	3	3	2	2	2	2	3	3	3	2	2	2	2	3	3	3	2	2	2	2	26.3	26.3	26.3	8.496	76	76;76	0	11.449	2.6555	0.96153	14.312	16	8	Leave out requantified	2.4324	2.3125	2.3119	2.6429
78	sp|Q99613|EIF3C_HUMAN;sp|B5ME19|EIFCL_HUMAN	sp|Q99613|EIF3C_HUMAN;sp|B5ME19|EIFCL_HUMAN	24;24	24;24	24;24	sp|Q99613|EIF3C_HUMAN Eukaryotic translation initiation factor 3 subunit C OS=Homo sapiens OX=9606 GN=EIF3C PE=1 SV=1;sp|B5ME19|EIFCL_HUMAN Eukaryotic translation initiation factor 3 subunit C-like protein OS=Homo sapiens OX=9606 GN=EIF3CL PE=1 SV=1	2	24	24	24	11	10	11	16	13	11	12	11	10	11	16	13	11	12	11	10	11	16	13	11	12	28.3	28.3	28.3	105.34	913	913;914	0	108.49	3.7036	1.6888	24.659	82	36	Leave out requantified	4.6636	4.1221	4.4067	3.7036
79	sp|E9PAV3|NACAM_HUMAN;sp|Q13765|NACA_HUMAN;sp|Q9BZK3|NACP4_HUMAN	sp|E9PAV3|NACAM_HUMAN;sp|Q13765|NACA_HUMAN	3;3;1	3;3;1	3;3;1	sp|E9PAV3|NACAM_HUMAN Nascent polypeptide-associated complex subunit alpha, muscle-specific form OS=Homo sapiens OX=9606 GN=NACA PE=1 SV=1;sp|Q13765|NACA_HUMAN Nascent polypeptide-associated complex subunit alpha OS=Homo sapiens OX=9606 GN=NACA PE=1 SV=1	3	3	3	3	3	3	3	2	3	3	3	3	3	3	2	3	3	3	3	3	3	2	3	3	3	2	2	2	205.42	2078	2078;215;213	0	45.673	1.3882	0.58788	6.2912	24	15	Leave out requantified	2.0166	0.26179	0.19973	0.23968
81	sp|O00116|ADAS_HUMAN	sp|O00116|ADAS_HUMAN	5	5	5	sp|O00116|ADAS_HUMAN Alkyldihydroxyacetonephosphate synthase, peroxisomal OS=Homo sapiens OX=9606 GN=AGPS PE=1 SV=1	1	5	5	5	2	2	2	0	2	2	2	2	2	2	0	2	2	2	2	2	2	0	2	2	2	10.3	10.3	10.3	72.911	658	658	0	7.901	2.3806	1.026	52.282	11	9	Median	1.9308	2.4731	1.9815
82	sp|O00148|DX39A_HUMAN	sp|O00148|DX39A_HUMAN	16	4	4	sp|O00148|DX39A_HUMAN ATP-dependent RNA helicase DDX39A OS=Homo sapiens OX=9606 GN=DDX39A PE=1 SV=2	1	16	4	4	9	9	11	11	8	10	10	3	2	2	2	2	1	1	3	2	2	2	2	1	1	42.9	13.8	13.8	49.129	427	427	0	19.901	5.1473	2.0138	98.067	12	9	Linear	0.93528	1.0991	0.75705	0.66742
83	sp|O00151|PDLI1_HUMAN	sp|O00151|PDLI1_HUMAN	11	11	11	sp|O00151|PDLI1_HUMAN PDZ and LIM domain protein 1 OS=Homo sapiens OX=9606 GN=PDLIM1 PE=1 SV=4	1	11	11	11	6	5	6	5	6	5	4	6	5	6	5	6	5	4	6	5	6	5	6	5	4	60.5	60.5	60.5	36.071	329	329	0	88.26	1.4032	0.91467	39.783	37	10	Leave out requantified	1.9214	1.769	1.6975	2.387
84	sp|O00154|BACH_HUMAN;sp|Q6ZUV0|BACHL_HUMAN	sp|O00154|BACH_HUMAN	9;1	9;1	9;1	sp|O00154|BACH_HUMAN Cytosolic acyl coenzyme A thioester hydrolase OS=Homo sapiens OX=9606 GN=ACOT7 PE=1 SV=3	2	9	9	9	5	8	7	5	7	6	4	5	8	7	5	7	6	4	5	8	7	5	7	6	4	27.1	27.1	27.1	41.796	380	380;252	0	47.372	2.4901	1.0266	17.668	46	10	Leave out requantified	2.919	2.49	2.821	2.7441
85	sp|O00159|MYO1C_HUMAN	sp|O00159|MYO1C_HUMAN	12	12	12	sp|O00159|MYO1C_HUMAN Unconventional myosin-Ic OS=Homo sapiens OX=9606 GN=MYO1C PE=1 SV=4	1	12	12	12	8	6	5	7	4	6	3	8	6	5	7	4	6	3	8	6	5	7	4	6	3	14.3	14.3	14.3	121.68	1063	1063	0	42.936	2.0118	0.82852	91.708	25	23	Median	2.7129	0.53246	1.2057	3.1712
86	sp|O00170|AIP_HUMAN	sp|O00170|AIP_HUMAN	4	4	4	sp|O00170|AIP_HUMAN AH receptor-interacting protein OS=Homo sapiens OX=9606 GN=AIP PE=1 SV=2	1	4	4	4	2	1	1	2	1	2	2	2	1	1	2	1	2	2	2	1	1	2	1	2	2	18.2	18.2	18.2	37.636	330	330	0	9.9573	2.9749	0.32145	70.133	9	7	Linear	0.79362	1.0672	2.9395	0.8486
87	sp|O00203|AP3B1_HUMAN;sp|Q13367|AP3B2_HUMAN	sp|O00203|AP3B1_HUMAN	10;2	10;2	10;2	sp|O00203|AP3B1_HUMAN AP-3 complex subunit beta-1 OS=Homo sapiens OX=9606 GN=AP3B1 PE=1 SV=3	2	10	10	10	3	5	3	2	2	2	2	3	5	3	2	2	2	2	3	5	3	2	2	2	2	9.7	9.7	9.7	121.32	1094	1094;1082	0	11.934	3.6917	1.4297	26.922	17	12	Leave out requantified	1.5842	2.6292	2.608	1.9861
88	sp|O00217|NDUS8_HUMAN	sp|O00217|NDUS8_HUMAN	1	1	1	sp|O00217|NDUS8_HUMAN NADH dehydrogenase [ubiquinone] iron-sulfur protein 8, mitochondrial OS=Homo sapiens OX=9606 GN=NDUFS8 PE=1 SV=1	1	1	1	1	1	1	1	1	1	1	0	1	1	1	1	1	1	0	1	1	1	1	1	1	0	4.3	4.3	4.3	23.705	210	210	0	2.1911	2.9343	1.182	23.876	6	5	Median	3.7787	3.1568	3.4781	2.7274
90	sp|O00231|PSD11_HUMAN	sp|O00231|PSD11_HUMAN	20	20	20	sp|O00231|PSD11_HUMAN 26S proteasome non-ATPase regulatory subunit 11 OS=Homo sapiens OX=9606 GN=PSMD11 PE=1 SV=3	1	20	20	20	14	14	13	11	13	15	14	14	14	13	11	13	15	14	14	14	13	11	13	15	14	56.6	56.6	56.6	47.463	422	422	0	104.63	2.8241	1.2377	16.627	92	28	Leave out requantified	3.1518	2.8282	3.4961	2.9778
91	sp|O00232|PSD12_HUMAN	sp|O00232|PSD12_HUMAN	22	22	22	sp|O00232|PSD12_HUMAN 26S proteasome non-ATPase regulatory subunit 12 OS=Homo sapiens OX=9606 GN=PSMD12 PE=1 SV=3	1	22	22	22	17	14	15	13	15	16	14	17	14	15	13	15	16	14	17	14	15	13	15	16	14	52.2	52.2	52.2	52.904	456	456	0	80.25	2.8633	1.1939	20.736	112	31	Leave out requantified	3.1267	2.9068	3.486	2.8298
94	sp|O00299|CLIC1_HUMAN	sp|O00299|CLIC1_HUMAN	17	17	17	sp|O00299|CLIC1_HUMAN Chloride intracellular channel protein 1 OS=Homo sapiens OX=9606 GN=CLIC1 PE=1 SV=4	1	17	17	17	13	15	15	15	15	15	15	13	15	15	15	15	15	15	13	15	15	15	15	15	15	83	83	83	26.922	241	241	0	226.13	2.0694	0.98476	46.922	143	21	Leave out requantified	2.1819	2.0724	2.2878	2.1512
95	sp|O00303|EIF3F_HUMAN	sp|O00303|EIF3F_HUMAN	10	10	10	sp|O00303|EIF3F_HUMAN Eukaryotic translation initiation factor 3 subunit F OS=Homo sapiens OX=9606 GN=EIF3F PE=1 SV=1	1	10	10	10	8	6	7	7	8	10	6	8	6	7	7	8	10	6	8	6	7	7	8	10	6	37.3	37.3	37.3	37.563	357	357	0	63.669	3.6494	1.3113	21.665	52	17	Leave out requantified	4.1	3.9677	4.3783	4.0181
96	sp|O00410|IPO5_HUMAN;sp|O60518|RNBP6_HUMAN	sp|O00410|IPO5_HUMAN	31;1	31;1	31;1	sp|O00410|IPO5_HUMAN Importin-5 OS=Homo sapiens OX=9606 GN=IPO5 PE=1 SV=4	2	31	31	31	16	20	19	23	16	18	20	16	20	19	23	16	18	20	16	20	19	23	16	18	20	42.1	42.1	42.1	123.63	1097	1097;1105	0	137.11	1.9737	0.87985	22.473	135	36	Leave out requantified	2.2666	2.2919	2.4822	2.2077
97	sp|O00429|DNM1L_HUMAN	sp|O00429|DNM1L_HUMAN	13	13	13	sp|O00429|DNM1L_HUMAN Dynamin-1-like protein OS=Homo sapiens OX=9606 GN=DNM1L PE=1 SV=2	1	13	13	13	7	5	7	7	5	6	6	7	5	7	7	5	6	6	7	5	7	7	5	6	6	22.1	22.1	22.1	81.876	736	736	0	45.727	2.9024	1.389	33.677	38	30	Leave out requantified	2.1885	2.5217	1.7566	2.914
100	sp|O00487|PSDE_HUMAN	sp|O00487|PSDE_HUMAN	6	6	6	sp|O00487|PSDE_HUMAN 26S proteasome non-ATPase regulatory subunit 14 OS=Homo sapiens OX=9606 GN=PSMD14 PE=1 SV=1	1	6	6	6	4	4	4	4	4	5	3	4	4	4	4	4	5	3	4	4	4	4	4	5	3	27.7	27.7	27.7	34.577	310	310	0	28.264	2.2241	0.98293	55.291	28	2	Leave out requantified	2.4141	2.6264	2.3618	2.4692
101	sp|O00505|IMA4_HUMAN	sp|O00505|IMA4_HUMAN	4	4	3	sp|O00505|IMA4_HUMAN Importin subunit alpha-4 OS=Homo sapiens OX=9606 GN=KPNA3 PE=1 SV=2	1	4	4	3	1	0	0	1	2	2	2	1	0	0	1	2	2	2	1	0	0	1	2	1	2	13.6	13.6	10.9	57.81	521	521	0	3.9045	1.6312	0.84163	12.187	8	1	Leave out requantified	1.1837			1.4488
103	sp|O00560|SDCB1_HUMAN	sp|O00560|SDCB1_HUMAN	10	10	10	sp|O00560|SDCB1_HUMAN Syntenin-1 OS=Homo sapiens OX=9606 GN=SDCBP PE=1 SV=1	1	10	10	10	9	8	7	8	9	8	8	9	8	7	8	9	8	8	9	8	7	8	9	8	8	59.1	59.1	59.1	32.444	298	298	0	247.57	1.2051	0.44891	40.008	66	4	Leave out requantified	1.2694	1.2051	1.3351	1.1572
104	sp|O00571|DDX3X_HUMAN;sp|O15523|DDX3Y_HUMAN;sp|Q9NQI0|DDX4_HUMAN	sp|O00571|DDX3X_HUMAN;sp|O15523|DDX3Y_HUMAN	16;13;1	16;13;1	15;12;1	sp|O00571|DDX3X_HUMAN ATP-dependent RNA helicase DDX3X OS=Homo sapiens OX=9606 GN=DDX3X PE=1 SV=3;sp|O15523|DDX3Y_HUMAN ATP-dependent RNA helicase DDX3Y OS=Homo sapiens OX=9606 GN=DDX3Y PE=1 SV=2	3	16	16	15	6	11	10	11	9	8	9	6	11	10	11	9	8	9	6	10	10	10	8	7	8	30.8	30.8	29.2	73.243	662	662;660;724	0	71.302	6.1873	2.3879	102.73	62	37	Leave out requantified	4.4847	5.0231	6.9472	6.2091
105	sp|O00592|PODXL_HUMAN	sp|O00592|PODXL_HUMAN	4	4	4	sp|O00592|PODXL_HUMAN Podocalyxin OS=Homo sapiens OX=9606 GN=PODXL PE=1 SV=2	1	4	4	4	2	2	3	2	3	2	2	2	2	3	2	3	2	2	2	2	3	2	3	2	2	7.3	7.3	7.3	58.635	558	558	0	7.7991	2.1951	0.94322	30.061	16	2	Leave out requantified	2.1815	2.1305	2.5204	2.2056
106	sp|O00743|PPP6_HUMAN	sp|O00743|PPP6_HUMAN	4	4	4	sp|O00743|PPP6_HUMAN Serine/threonine-protein phosphatase 6 catalytic subunit OS=Homo sapiens OX=9606 GN=PPP6C PE=1 SV=1	1	4	4	4	4	3	2	3	4	2	1	4	3	2	3	4	2	1	4	3	2	3	4	2	1	14.8	14.8	14.8	35.144	305	305	0	15.507	2.8897	1.5967	17.499	17	8	Leave out requantified	2.5087	2.8809	4.1515	3.3953
107	sp|O00764|PDXK_HUMAN	sp|O00764|PDXK_HUMAN	5	5	5	sp|O00764|PDXK_HUMAN Pyridoxal kinase OS=Homo sapiens OX=9606 GN=PDXK PE=1 SV=1	1	5	5	5	3	3	3	3	2	2	4	3	3	3	3	2	2	4	3	3	3	3	2	2	4	20.5	20.5	20.5	35.102	312	312	0	54.266	2.5225	1.0215	25.238	21	2	Leave out requantified	2.7127	2.9852	2.4629	2.5827
110	sp|O14579|COPE_HUMAN	sp|O14579|COPE_HUMAN	6	6	6	sp|O14579|COPE_HUMAN Coatomer subunit epsilon OS=Homo sapiens OX=9606 GN=COPE PE=1 SV=3	1	6	6	6	3	4	5	5	5	4	1	3	4	5	5	5	4	1	3	4	5	5	5	4	1	24.7	24.7	24.7	34.482	308	308	0	21.996	2.5697	1.3632	29.916	24	17	Leave out requantified	1.8779	1.7885	2.7832	1.8025
111	sp|P47813|IF1AX_HUMAN;sp|O14602|IF1AY_HUMAN	sp|P47813|IF1AX_HUMAN;sp|O14602|IF1AY_HUMAN	4;4	4;4	4;4	sp|P47813|IF1AX_HUMAN Eukaryotic translation initiation factor 1A, X-chromosomal OS=Homo sapiens OX=9606 GN=EIF1AX PE=1 SV=2;sp|O14602|IF1AY_HUMAN Eukaryotic translation initiation factor 1A, Y-chromosomal OS=Homo sapiens OX=9606 GN=EIF1AY PE=1 SV=4	2	4	4	4	2	2	3	2	2	2	2	2	2	3	2	2	2	2	2	2	3	2	2	2	2	24.3	24.3	24.3	16.46	144	144;144	0	21.603	4.0834	2.1435	49.425	12	9	Median	1.1479	3.8062	4.8979	4.7158
112	sp|O14617|AP3D1_HUMAN	sp|O14617|AP3D1_HUMAN	7	7	7	sp|O14617|AP3D1_HUMAN AP-3 complex subunit delta-1 OS=Homo sapiens OX=9606 GN=AP3D1 PE=1 SV=1	1	7	7	7	3	2	2	1	4	3	2	3	2	2	1	4	3	2	3	2	2	1	4	3	2	7.9	7.9	7.9	130.16	1153	1153	0	18.655	2.0173	0.89882	76.107	15	13	Median	1.0642	2.0992	2.555	2.3599
113	sp|O14672|ADA10_HUMAN	sp|O14672|ADA10_HUMAN	3	3	3	sp|O14672|ADA10_HUMAN Disintegrin and metalloproteinase domain-containing protein 10 OS=Homo sapiens OX=9606 GN=ADAM10 PE=1 SV=1	1	3	3	3	1	1	2	2	1	2	1	1	1	2	2	1	2	1	1	1	2	2	1	2	1	5.2	5.2	5.2	84.141	748	748	0	8.3191	1.0695	0.43636	16.06	10	1	Leave out requantified	1.2225	1.1895	1.2494	0.93827
114	sp|O14744|ANM5_HUMAN	sp|O14744|ANM5_HUMAN	7	7	7	sp|O14744|ANM5_HUMAN Protein arginine N-methyltransferase 5 OS=Homo sapiens OX=9606 GN=PRMT5 PE=1 SV=4	1	7	7	7	3	3	3	2	1	2	1	3	3	3	2	1	2	1	3	3	3	2	1	2	1	18.4	18.4	18.4	72.683	637	637	0	14.402	2.4158	1.0386	62.991	14	7	Leave out requantified	0.81354	3.043	1.8411	1.981
116	sp|O14776|TCRG1_HUMAN	sp|O14776|TCRG1_HUMAN	2	2	2	sp|O14776|TCRG1_HUMAN Transcription elongation regulator 1 OS=Homo sapiens OX=9606 GN=TCERG1 PE=1 SV=2	1	2	2	2	1	1	1	0	0	1	0	1	1	1	0	0	1	0	1	1	1	0	0	1	0	2.2	2.2	2.2	123.9	1098	1098	0	6.0655	2.0532	0.91067	13.527	3	2	Median	1.9996	2.2825
117	sp|O14786|NRP1_HUMAN	sp|O14786|NRP1_HUMAN	1	1	1	sp|O14786|NRP1_HUMAN Neuropilin-1 OS=Homo sapiens OX=9606 GN=NRP1 PE=1 SV=3	1	1	1	1	1	1	0	1	0	1	0	1	1	0	1	0	1	0	1	1	0	1	0	1	0	1.5	1.5	1.5	103.13	923	923	0	2.4218	0.66316	0.27871	13.804	4	4	Median	0.69508	0.57928		0.83319
118	sp|O14818|PSA7_HUMAN;sp|Q8TAA3|PSMA8_HUMAN	sp|O14818|PSA7_HUMAN	15;5	15;5	15;5	sp|O14818|PSA7_HUMAN Proteasome subunit alpha type-7 OS=Homo sapiens OX=9606 GN=PSMA7 PE=1 SV=1	2	15	15	15	11	12	10	12	13	14	12	11	12	10	12	13	14	12	11	12	10	12	13	14	12	67.3	67.3	67.3	27.887	248	248;256	0	100.41	2.2651	1.018	25.382	98	21	Leave out requantified	2.2829	2.2188	2.1972	2.2723
119	sp|O14828|SCAM3_HUMAN	sp|O14828|SCAM3_HUMAN	4	4	4	sp|O14828|SCAM3_HUMAN Secretory carrier-associated membrane protein 3 OS=Homo sapiens OX=9606 GN=SCAMP3 PE=1 SV=3	1	4	4	4	0	2	1	2	1	0	1	0	2	1	2	1	0	1	0	2	1	2	1	0	1	22.2	22.2	22.2	38.287	347	347	0	25.952	1.8801	0.91372	96.036	5	5	Median		1.8516	1.3432
121	sp|O14880|MGST3_HUMAN	sp|O14880|MGST3_HUMAN	1	1	1	sp|O14880|MGST3_HUMAN Microsomal glutathione S-transferase 3 OS=Homo sapiens OX=9606 GN=MGST3 PE=1 SV=1	1	1	1	1	1	0	1	1	0	0	1	1	0	1	1	0	0	1	1	0	1	1	0	0	1	8.6	8.6	8.6	16.516	152	152	0	10.479	3.9087	1.1817	6.6586	4	0	Linear	3.127		3.6799	3.5004
123	sp|O14929|HAT1_HUMAN	sp|O14929|HAT1_HUMAN	7	7	7	sp|O14929|HAT1_HUMAN Histone acetyltransferase type B catalytic subunit OS=Homo sapiens OX=9606 GN=HAT1 PE=1 SV=1	1	7	7	7	4	4	3	5	4	3	4	4	4	3	5	4	3	4	4	4	3	5	4	3	4	22.7	22.7	22.7	49.512	419	419	0	18.705	2.9816	1.2996	32.177	24	16	Leave out requantified	4.3749	2.1666	1.2666	2.7674
124	sp|P19105|ML12A_HUMAN;sp|O14950|ML12B_HUMAN	sp|P19105|ML12A_HUMAN;sp|O14950|ML12B_HUMAN	8;8	8;8	4;4	sp|P19105|ML12A_HUMAN Myosin regulatory light chain 12A OS=Homo sapiens OX=9606 GN=MYL12A PE=1 SV=2;sp|O14950|ML12B_HUMAN Myosin regulatory light chain 12B OS=Homo sapiens OX=9606 GN=MYL12B PE=1 SV=2	2	8	8	4	8	8	6	7	7	8	8	8	8	6	7	7	8	8	4	4	4	3	3	4	4	62.6	62.6	29.2	19.794	171	171;172	0	215.36	3.321	1.2885	36.61	92	32	Leave out requantified	3.3936	3.5428	3.7603	3.504
125	sp|O14964|HGS_HUMAN	sp|O14964|HGS_HUMAN	3	3	3	sp|O14964|HGS_HUMAN Hepatocyte growth factor-regulated tyrosine kinase substrate OS=Homo sapiens OX=9606 GN=HGS PE=1 SV=1	1	3	3	3	0	1	1	2	2	0	0	0	1	1	2	2	0	0	0	1	1	2	2	0	0	4.2	4.2	4.2	86.191	777	777	0	5.4446	1.4935	0.6297	125.1	6	4	Median		2.122	1.3034	1.8255
127	sp|O14979|HNRDL_HUMAN	sp|O14979|HNRDL_HUMAN	7	5	5	sp|O14979|HNRDL_HUMAN Heterogeneous nuclear ribonucleoprotein D-like OS=Homo sapiens OX=9606 GN=HNRNPDL PE=1 SV=3	1	7	5	5	5	5	5	4	5	5	6	4	4	4	3	3	4	5	4	4	4	3	3	4	5	17.4	15	15	46.437	420	420	0	15.903	3.7678	1.6016	11.518	27	9	Leave out requantified	3.8163	3.9048	3.8302	3.5479
128	sp|O14980|XPO1_HUMAN	sp|O14980|XPO1_HUMAN	24	24	24	sp|O14980|XPO1_HUMAN Exportin-1 OS=Homo sapiens OX=9606 GN=XPO1 PE=1 SV=1	1	24	24	24	12	19	16	15	17	13	16	12	19	16	15	17	13	16	12	19	16	15	17	13	16	27.3	27.3	27.3	123.38	1071	1071	0	93.247	4.2141	1.7802	13.47	108	49	Leave out requantified	4.813	4.3365	5.3686	5.4578
129	sp|O15020|SPTN2_HUMAN	sp|O15020|SPTN2_HUMAN	5	1	1	sp|O15020|SPTN2_HUMAN Spectrin beta chain, non-erythrocytic 2 OS=Homo sapiens OX=9606 GN=SPTBN2 PE=1 SV=3	1	5	1	1	1	3	4	3	3	2	2	1	1	1	1	1	1	1	1	1	1	1	1	1	1	2	0.3	0.3	271.32	2390	2390	0.0096205	0.98542	0.037641	0.012536	103.02	7	7	Median	0.013196	0.038032	0.037641	0.016904
131	sp|O15067|PUR4_HUMAN	sp|O15067|PUR4_HUMAN	7	7	7	sp|O15067|PUR4_HUMAN Phosphoribosylformylglycinamidine synthase OS=Homo sapiens OX=9606 GN=PFAS PE=1 SV=4	1	7	7	7	2	3	2	3	2	4	1	2	3	2	3	2	4	1	2	3	2	3	2	4	1	7.2	7.2	7.2	144.73	1338	1338	0	13.886	1.676	0.6946	28.684	15	7	Leave out requantified	1.7674	2.3189	1.4842	2.3944
132	sp|O15118|NPC1_HUMAN	sp|O15118|NPC1_HUMAN	8	8	8	sp|O15118|NPC1_HUMAN NPC intracellular cholesterol transporter 1 OS=Homo sapiens OX=9606 GN=NPC1 PE=1 SV=2	1	8	8	8	4	4	7	4	3	4	4	4	4	7	4	3	4	4	4	4	7	4	3	4	4	9.1	9.1	9.1	142.17	1278	1278	0	38.868	1.3543	0.59331	22.125	30	8	Leave out requantified	1.4825	1.3801	1.3792	1.5792
134	sp|O15143|ARC1B_HUMAN	sp|O15143|ARC1B_HUMAN	11	11	10	sp|O15143|ARC1B_HUMAN Actin-related protein 2/3 complex subunit 1B OS=Homo sapiens OX=9606 GN=ARPC1B PE=1 SV=3	1	11	11	10	5	9	7	6	5	7	3	5	9	7	6	5	7	3	5	8	6	5	5	7	3	45.4	45.4	39.2	40.949	372	372	0	68.275	3.8773	1.482	42.524	39	18	Leave out requantified	4.2922	3.8773	4.3123	3.4359
135	sp|O15144|ARPC2_HUMAN	sp|O15144|ARPC2_HUMAN	14	14	14	sp|O15144|ARPC2_HUMAN Actin-related protein 2/3 complex subunit 2 OS=Homo sapiens OX=9606 GN=ARPC2 PE=1 SV=1	1	14	14	14	8	8	7	10	8	9	9	8	8	7	10	8	9	9	8	8	7	10	8	9	9	49.7	49.7	49.7	34.333	300	300	0	69.356	2.7053	1.0877	16.131	67	19	Leave out requantified	2.7214	2.8224	3.0751	2.9707
136	sp|O15145|ARPC3_HUMAN	sp|O15145|ARPC3_HUMAN	8	8	8	sp|O15145|ARPC3_HUMAN Actin-related protein 2/3 complex subunit 3 OS=Homo sapiens OX=9606 GN=ARPC3 PE=1 SV=3	1	8	8	8	5	4	5	3	3	1	0	5	4	5	3	3	1	0	5	4	5	3	3	1	0	42.7	42.7	42.7	20.546	178	178	0	16.066	3.0495	1.3903	25.898	22	8	Leave out requantified	3.7596	2.5174	3.2053	1.8846
137	sp|O15173|PGRC2_HUMAN	sp|O15173|PGRC2_HUMAN	4	4	4	sp|O15173|PGRC2_HUMAN Membrane-associated progesterone receptor component 2 OS=Homo sapiens OX=9606 GN=PGRMC2 PE=1 SV=1	1	4	4	4	2	2	2	1	2	3	3	2	2	2	1	2	3	3	2	2	2	1	2	3	3	26.5	26.5	26.5	23.818	223	223	0	23.995	1.5073	0.69973	60.409	15	2	Leave out requantified	1.1639	1.2731	1.8918	1.1167
138	sp|O15231|ZN185_HUMAN	sp|O15231|ZN185_HUMAN	1	1	1	sp|O15231|ZN185_HUMAN Zinc finger protein 185 OS=Homo sapiens OX=9606 GN=ZNF185 PE=1 SV=3	1	1	1	1	0	0	1	1	1	0	1	0	0	1	1	1	0	1	0	0	1	1	1	0	1	4.5	4.5	4.5	73.525	689	689	0	5.9472	1.7879	1.1615	22.201	4	3	Median			1.9396	1.6706
139	sp|O15258|RER1_HUMAN	sp|O15258|RER1_HUMAN	2	2	2	sp|O15258|RER1_HUMAN Protein RER1 OS=Homo sapiens OX=9606 GN=RER1 PE=1 SV=1	1	2	2	2	2	1	2	1	1	0	1	2	1	2	1	1	0	1	2	1	2	1	1	0	1	14.8	14.8	14.8	22.958	196	196	0	5.6852	1.3496	0.85257	29.018	8	5	Median	1.117	1.3385	1.3423	2.2958
140	sp|O15260|SURF4_HUMAN	sp|O15260|SURF4_HUMAN	4	4	4	sp|O15260|SURF4_HUMAN Surfeit locus protein 4 OS=Homo sapiens OX=9606 GN=SURF4 PE=1 SV=3	1	4	4	4	3	2	3	2	3	4	3	3	2	3	2	3	4	3	3	2	3	2	3	4	3	17.8	17.8	17.8	30.394	269	269	0	24.597	4.1783	1.489	19.065	19	8	Leave out requantified	3.644	3.1457	4.3239	2.6875
141	sp|O15269|SPTC1_HUMAN	sp|O15269|SPTC1_HUMAN	4	4	4	sp|O15269|SPTC1_HUMAN Serine palmitoyltransferase 1 OS=Homo sapiens OX=9606 GN=SPTLC1 PE=1 SV=1	1	4	4	4	1	0	0	2	0	1	0	1	0	0	2	0	1	0	1	0	0	2	0	1	0	12.9	12.9	12.9	52.743	473	473	0	3.8943	1.3298	0.64376	24.414	4	4	Median	1.1927			1.5789
143	sp|O15305|PMM2_HUMAN	sp|O15305|PMM2_HUMAN	1	1	1	sp|O15305|PMM2_HUMAN Phosphomannomutase 2 OS=Homo sapiens OX=9606 GN=PMM2 PE=1 SV=1	1	1	1	1	0	1	0	0	1	1	1	0	1	0	0	1	1	1	0	1	0	0	1	1	1	4.9	4.9	4.9	28.082	246	246	0.0055371	1.1814	0.14778	0.070433	23.675	3	3	Median
144	sp|O15347|HMGB3_HUMAN	sp|O15347|HMGB3_HUMAN	2	2	2	sp|O15347|HMGB3_HUMAN High mobility group protein B3 OS=Homo sapiens OX=9606 GN=HMGB3 PE=1 SV=4	1	2	2	2	1	1	0	1	0	1	0	1	1	0	1	0	1	0	1	1	0	1	0	1	0	10.5	10.5	10.5	22.98	200	200	0.0091251	1.0094	0.80774	0.31779	70.962	4	4	Median	0.76295	0.23934		0.85517
145	sp|O15355|PPM1G_HUMAN	sp|O15355|PPM1G_HUMAN	8	8	8	sp|O15355|PPM1G_HUMAN Protein phosphatase 1G OS=Homo sapiens OX=9606 GN=PPM1G PE=1 SV=1	1	8	8	8	7	5	4	6	5	5	5	7	5	4	6	5	5	5	7	5	4	6	5	5	5	20.7	20.7	20.7	59.271	546	546	0	33.83	1.5669	0.70525	42.601	41	18	Leave out requantified	1.9637	2.175	1.517	1.1953
146	sp|O15371|EIF3D_HUMAN	sp|O15371|EIF3D_HUMAN	15	15	15	sp|O15371|EIF3D_HUMAN Eukaryotic translation initiation factor 3 subunit D OS=Homo sapiens OX=9606 GN=EIF3D PE=1 SV=1	1	15	15	15	9	7	9	8	8	9	5	9	7	9	8	8	9	5	9	7	9	8	8	9	5	40	40	40	63.972	548	548	0	82.063	3.8529	1.4806	19.57	51	35	Leave out requantified	4.2073	4.0141	2.6335	3.2463
147	sp|O15372|EIF3H_HUMAN	sp|O15372|EIF3H_HUMAN	9	9	9	sp|O15372|EIF3H_HUMAN Eukaryotic translation initiation factor 3 subunit H OS=Homo sapiens OX=9606 GN=EIF3H PE=1 SV=1	1	9	9	9	7	5	5	4	6	3	5	7	5	5	4	6	3	5	7	5	5	4	6	3	5	31.5	31.5	31.5	39.93	352	352	0	46.295	4.0229	1.499	51.437	34	12	Leave out requantified	3.3444	3.8499	4.4023	4.1785
148	sp|O15397|IPO8_HUMAN	sp|O15397|IPO8_HUMAN	3	2	2	sp|O15397|IPO8_HUMAN Importin-8 OS=Homo sapiens OX=9606 GN=IPO8 PE=1 SV=2	1	3	2	2	1	2	1	1	2	1	2	0	1	0	0	1	0	1	0	1	0	0	1	0	1	3.3	2.3	2.3	119.94	1037	1037	0.0056402	1.3244	1.597	0.64337	52.514	3	3	Plateau		1.597
149	sp|O15400|STX7_HUMAN	sp|O15400|STX7_HUMAN	2	2	2	sp|O15400|STX7_HUMAN Syntaxin-7 OS=Homo sapiens OX=9606 GN=STX7 PE=1 SV=4	1	2	2	2	2	0	1	1	1	1	0	2	0	1	1	1	1	0	2	0	1	1	1	1	0	11.1	11.1	11.1	29.815	261	261	0	16.238	0.13094	0.051125	92.045	6	5	Median	0.19891		0.11736	0.12384
150	sp|O15427|MOT4_HUMAN	sp|O15427|MOT4_HUMAN	5	5	5	sp|O15427|MOT4_HUMAN Monocarboxylate transporter 4 OS=Homo sapiens OX=9606 GN=SLC16A3 PE=1 SV=1	1	5	5	5	3	3	2	1	2	3	4	3	3	2	1	2	3	4	3	3	2	1	2	3	4	10.3	10.3	10.3	49.469	465	465	0	4.9174	2.0277	0.83104	30.052	18	6	Leave out requantified	2.4952	2.5517	2.7838	2.4329
153	sp|O15511|ARPC5_HUMAN	sp|O15511|ARPC5_HUMAN	6	6	5	sp|O15511|ARPC5_HUMAN Actin-related protein 2/3 complex subunit 5 OS=Homo sapiens OX=9606 GN=ARPC5 PE=1 SV=3	1	6	6	5	4	3	4	4	4	5	3	4	3	4	4	4	5	3	3	2	3	3	3	4	3	62.3	62.3	62.3	16.32	151	151	0	63.479	1.7388	0.95443	28.986	27	6	Leave out requantified	1.6706	1.9143	2.3489	2.0616
154	sp|O43143|DHX15_HUMAN;sp|O60231|DHX16_HUMAN;sp|Q14562|DHX8_HUMAN	sp|O43143|DHX15_HUMAN	16;1;1	16;1;1	16;1;1	sp|O43143|DHX15_HUMAN Pre-mRNA-splicing factor ATP-dependent RNA helicase DHX15 OS=Homo sapiens OX=9606 GN=DHX15 PE=1 SV=2	3	16	16	16	8	10	8	7	8	8	8	8	10	8	7	8	8	8	8	10	8	7	8	8	8	26.3	26.3	26.3	90.932	795	795;1041;1220	0	46.339	4.535	1.9444	49.925	73	30	Leave out requantified	4.3831	4.3317	4.7557	5.2561
156	sp|O43169|CYB5B_HUMAN	sp|O43169|CYB5B_HUMAN	3	3	3	sp|O43169|CYB5B_HUMAN Cytochrome b5 type B OS=Homo sapiens OX=9606 GN=CYB5B PE=1 SV=3	1	3	3	3	2	2	3	2	3	3	2	2	2	3	2	3	3	2	2	2	3	2	3	3	2	36.7	36.7	36.7	16.694	150	150	0	30.302	1.9116	0.73741	18.459	14	0	Leave out requantified	1.7358	1.9419	1.9467	2.0363
158	sp|O43242|PSMD3_HUMAN	sp|O43242|PSMD3_HUMAN	21	21	21	sp|O43242|PSMD3_HUMAN 26S proteasome non-ATPase regulatory subunit 3 OS=Homo sapiens OX=9606 GN=PSMD3 PE=1 SV=2	1	21	21	21	14	15	12	12	14	12	12	14	15	12	12	14	12	12	14	15	12	12	14	12	12	42.5	42.5	42.5	60.977	534	534	0	79.745	3.0129	1.3399	20.035	90	35	Leave out requantified	3.2793	2.8413	3.1608	3.4205
160	sp|O43264|ZW10_HUMAN	sp|O43264|ZW10_HUMAN	2	2	2	sp|O43264|ZW10_HUMAN Centromere/kinetochore protein zw10 homolog OS=Homo sapiens OX=9606 GN=ZW10 PE=1 SV=3	1	2	2	2	1	0	1	2	0	0	0	1	0	1	2	0	0	0	1	0	1	2	0	0	0	2.8	2.8	2.8	88.828	779	779	0	2.0216	4.7695	2.0319	13.553	4	3	Median	5.0214		4.5302	5.0847
161	sp|O43286|B4GT5_HUMAN	sp|O43286|B4GT5_HUMAN	1	1	1	sp|O43286|B4GT5_HUMAN Beta-1,4-galactosyltransferase 5 OS=Homo sapiens OX=9606 GN=B4GALT5 PE=1 SV=1	1	1	1	1	1	1	1	1	1	1	1	1	1	1	1	1	1	1	1	1	1	1	1	1	1	2.1	2.1	2.1	45.118	388	388	0.0060606	1.1515	2.2723	0.97789	21.582	7	3	Median	2.4904	2.2723	3.0737	1.7675
162	sp|O43324|MCA3_HUMAN	sp|O43324|MCA3_HUMAN	4	4	4	sp|O43324|MCA3_HUMAN Eukaryotic translation elongation factor 1 epsilon-1 OS=Homo sapiens OX=9606 GN=EEF1E1 PE=1 SV=1	1	4	4	4	2	2	3	2	2	3	3	2	2	3	2	2	3	3	2	2	3	2	2	3	3	32.2	32.2	32.2	19.81	174	174	0	26.813	9.5403	4.0228	118.29	17	11	Linear	1.091	2.3394	2.8759	0.56948
163	sp|O43390|HNRPR_HUMAN	sp|O43390|HNRPR_HUMAN	20	20	14	sp|O43390|HNRPR_HUMAN Heterogeneous nuclear ribonucleoprotein R OS=Homo sapiens OX=9606 GN=HNRNPR PE=1 SV=1	1	20	20	14	8	8	9	16	10	16	11	8	8	9	16	10	16	11	3	3	5	11	4	11	7	34.1	34.1	25.3	70.942	633	633	0	78.424	4.3019	1.8391	30.878	74	33	Leave out requantified	4.5052	4.1277	5.2496	5.0124
164	sp|O43395|PRPF3_HUMAN	sp|O43395|PRPF3_HUMAN	1	1	1	sp|O43395|PRPF3_HUMAN U4/U6 small nuclear ribonucleoprotein Prp3 OS=Homo sapiens OX=9606 GN=PRPF3 PE=1 SV=2	1	1	1	1	0	1	1	1	1	1	0	0	1	1	1	1	1	0	0	1	1	1	1	1	0	1.5	1.5	1.5	77.528	683	683	0.0060406	1.108	1.6172	0.7388	13.371	5	5	Median		1.5788	1.6172	1.5855
165	sp|O43396|TXNL1_HUMAN	sp|O43396|TXNL1_HUMAN	10	10	10	sp|O43396|TXNL1_HUMAN Thioredoxin-like protein 1 OS=Homo sapiens OX=9606 GN=TXNL1 PE=1 SV=3	1	10	10	10	5	5	4	7	5	4	7	5	5	4	7	5	4	7	5	5	4	7	5	4	7	51.2	51.2	51.2	32.251	289	289	0	27.584	1.5527	0.71196	16.012	37	10	Leave out requantified	1.6706	1.8239	1.6993	1.5527
166	sp|O43399|TPD54_HUMAN	sp|O43399|TPD54_HUMAN	7	7	7	sp|O43399|TPD54_HUMAN Tumor protein D54 OS=Homo sapiens OX=9606 GN=TPD52L2 PE=1 SV=2	1	7	7	7	3	3	5	3	4	4	3	3	3	5	3	4	4	3	3	3	5	3	4	4	3	45.1	45.1	45.1	22.237	206	206	0	42.622	2.146	0.96156	26.359	23	1	Leave out requantified	2.1956	1.993	2.3941	2.3061
167	sp|O43447|PPIH_HUMAN	sp|O43447|PPIH_HUMAN	4	4	4	sp|O43447|PPIH_HUMAN Peptidyl-prolyl cis-trans isomerase H OS=Homo sapiens OX=9606 GN=PPIH PE=1 SV=1	1	4	4	4	3	1	1	1	1	2	2	3	1	1	1	1	2	2	3	1	1	1	1	2	2	19.2	19.2	19.2	19.208	177	177	0	2.6349	2.1291	1.2024	26.519	11	4	Leave out requantified	2.2399	3.0828	1.4316	2.0002
169	sp|O43488|ARK72_HUMAN;sp|Q8NHP1|ARK74_HUMAN	sp|O43488|ARK72_HUMAN	3;1	3;1	3;1	sp|O43488|ARK72_HUMAN Aflatoxin B1 aldehyde reductase member 2 OS=Homo sapiens OX=9606 GN=AKR7A2 PE=1 SV=3	2	3	3	3	3	1	3	3	2	3	1	3	1	3	3	2	3	1	3	1	3	3	2	3	1	12.5	12.5	12.5	39.589	359	359;331	0	15.911	2.614	1.0742	15.32	16	7	Leave out requantified	2.5593	2.1323	3.2686	3.329
170	sp|O43491|E41L2_HUMAN	sp|O43491|E41L2_HUMAN	3	3	3	sp|O43491|E41L2_HUMAN Band 4.1-like protein 2 OS=Homo sapiens OX=9606 GN=EPB41L2 PE=1 SV=1	1	3	3	3	1	2	1	2	2	1	1	1	2	1	2	2	1	1	1	2	1	2	2	1	1	4.1	4.1	4.1	112.59	1005	1005	0	4.7081	1.0959	0.47425	97.323	9	6	Median	0.35243	1.5893	0.39115	6.3168
171	sp|O43583|DENR_HUMAN	sp|O43583|DENR_HUMAN	4	4	4	sp|O43583|DENR_HUMAN Density-regulated protein OS=Homo sapiens OX=9606 GN=DENR PE=1 SV=2	1	4	4	4	2	2	2	2	2	3	3	2	2	2	2	2	3	3	2	2	2	2	2	3	3	21.2	21.2	21.2	22.092	198	198	0	4.5889	1.6732	0.87309	24.485	11	6	Leave out requantified	1.2274	1.708	1.9289	1.6732
173	sp|O43598|DNPH1_HUMAN	sp|O43598|DNPH1_HUMAN	1	1	1	sp|O43598|DNPH1_HUMAN 2-deoxynucleoside 5-phosphate N-hydrolase 1 OS=Homo sapiens OX=9606 GN=DNPH1 PE=1 SV=1	1	1	1	1	1	1	1	1	1	1	1	1	1	1	1	1	1	1	1	1	1	1	1	1	1	9.8	9.8	9.8	19.108	174	174	0	7.0349	2.4227	1.0045	16.109	7	0	Median	2.4227	2.205	3.0799	3.2864
174	sp|O43615|TIM44_HUMAN	sp|O43615|TIM44_HUMAN	9	9	9	sp|O43615|TIM44_HUMAN Mitochondrial import inner membrane translocase subunit TIM44 OS=Homo sapiens OX=9606 GN=TIMM44 PE=1 SV=2	1	9	9	9	6	5	5	5	5	7	5	6	5	5	5	5	7	5	6	5	5	5	5	7	5	21.7	21.7	21.7	51.355	452	452	0	26.721	2.6931	1.4008	43.582	34	16	Leave out requantified	2.5721	3.5852	3.3989	3.3411
175	sp|O43681|GET3_HUMAN	sp|O43681|GET3_HUMAN	10	10	10	sp|O43681|GET3_HUMAN ATPase GET3 OS=Homo sapiens OX=9606 GN=GET3 PE=1 SV=2	1	10	10	10	7	7	7	7	6	5	7	7	7	7	7	6	5	7	7	7	7	7	6	5	7	38.2	38.2	38.2	38.792	348	348	0	29.508	2.0265	0.85818	18.555	42	3	Leave out requantified	2.4157	2.1095	1.8917	2.0363
176	sp|O43684|BUB3_HUMAN	sp|O43684|BUB3_HUMAN	4	4	4	sp|O43684|BUB3_HUMAN Mitotic checkpoint protein BUB3 OS=Homo sapiens OX=9606 GN=BUB3 PE=1 SV=1	1	4	4	4	2	3	2	3	3	3	3	2	3	2	3	3	3	3	2	3	2	3	3	3	3	14.3	14.3	14.3	37.154	328	328	0	8.7816	2.3461	0.98102	30.256	19	8	Leave out requantified	2.867	2.2229	4.0811	2.6281
177	sp|O43707|ACTN4_HUMAN	sp|O43707|ACTN4_HUMAN	72	72	51	sp|O43707|ACTN4_HUMAN Alpha-actinin-4 OS=Homo sapiens OX=9606 GN=ACTN4 PE=1 SV=2	1	72	72	51	63	64	64	61	61	61	59	63	64	64	61	61	61	59	45	46	44	44	43	40	41	79.1	79.1	60.2	104.85	911	911	0	323.31	2.027	1.0002	30.338	735	97	Leave out requantified	2.0757	2.0331	2.1243	2.045
178	sp|O43708|MAAI_HUMAN	sp|O43708|MAAI_HUMAN	2	2	2	sp|O43708|MAAI_HUMAN Maleylacetoacetate isomerase OS=Homo sapiens OX=9606 GN=GSTZ1 PE=1 SV=3	1	2	2	2	2	2	2	2	1	1	1	2	2	2	2	1	1	1	2	2	2	2	1	1	1	15.7	15.7	15.7	24.212	216	216	0	23.44	1.8274	0.69631	8.6913	12	4	Leave out requantified	1.9082	1.8312	2.2213	1.8236
179	sp|O43747|AP1G1_HUMAN	sp|O43747|AP1G1_HUMAN	7	7	7	sp|O43747|AP1G1_HUMAN AP-1 complex subunit gamma-1 OS=Homo sapiens OX=9606 GN=AP1G1 PE=1 SV=5	1	7	7	7	2	2	3	3	6	2	3	2	2	3	3	6	2	3	2	2	3	3	6	2	3	7.8	7.8	7.8	91.35	822	822	0	7.1979	3.3395	1.5806	9.0742	20	15	Leave out requantified	3.3155	3.5993	1.0152	3.2211
180	sp|O43760|SNG2_HUMAN	sp|O43760|SNG2_HUMAN	2	2	2	sp|O43760|SNG2_HUMAN Synaptogyrin-2 OS=Homo sapiens OX=9606 GN=SYNGR2 PE=1 SV=1	1	2	2	2	2	2	1	0	2	0	1	2	2	1	0	2	0	1	2	2	1	0	2	0	1	8	8	8	24.81	224	224	0.0050905	1.333	2.1522	0.76093	12.013	8	3	Leave out requantified	2.1587	1.8535	2.1221
181	sp|O43765|SGTA_HUMAN	sp|O43765|SGTA_HUMAN	4	4	4	sp|O43765|SGTA_HUMAN Small glutamine-rich tetratricopeptide repeat-containing protein alpha OS=Homo sapiens OX=9606 GN=SGTA PE=1 SV=1	1	4	4	4	2	2	3	2	3	3	2	2	2	3	2	3	3	2	2	2	3	2	3	3	2	15.7	15.7	15.7	34.063	313	313	0	14.511	1.7965	0.71169	13.165	17	4	Leave out requantified	1.8534	1.7159	2.1855	2.1084
182	sp|O43776|SYNC_HUMAN;REV__sp|H7BZ55|CRCC2_HUMAN	sp|O43776|SYNC_HUMAN	4;1	4;1	4;1	sp|O43776|SYNC_HUMAN Asparagine--tRNA ligase, cytoplasmic OS=Homo sapiens OX=9606 GN=NARS1 PE=1 SV=1	2	4	4	4	4	3	2	1	2	3	2	4	3	2	1	2	3	2	4	3	2	1	2	3	2	6.4	6.4	6.4	62.942	548	548;1653	0	7.2294	4.5462	1.6617	50.973	15	12	Median	4.2681	5.2836	4.8339	6.3911
183	sp|O43795|MYO1B_HUMAN	sp|O43795|MYO1B_HUMAN	2	2	2	sp|O43795|MYO1B_HUMAN Unconventional myosin-Ib OS=Homo sapiens OX=9606 GN=MYO1B PE=1 SV=3	1	2	2	2	0	0	1	0	1	1	0	0	0	1	0	1	1	0	0	0	1	0	1	1	0	2.4	2.4	2.4	131.98	1136	1136	0	2.7144	1.7815	0.73281	15.576	3	3	Median			1.8221
184	sp|O43809|CPSF5_HUMAN	sp|O43809|CPSF5_HUMAN	3	3	3	sp|O43809|CPSF5_HUMAN Cleavage and polyadenylation specificity factor subunit 5 OS=Homo sapiens OX=9606 GN=NUDT21 PE=1 SV=1	1	3	3	3	1	0	2	1	3	0	0	1	0	2	1	3	0	0	1	0	2	1	3	0	0	15	15	15	26.227	227	227	0	3.5214	3.7365	1.5443	50.009	5	3	Median	3.7365		2.8238	1.5672
185	sp|O43847|NRDC_HUMAN	sp|O43847|NRDC_HUMAN	9	9	9	sp|O43847|NRDC_HUMAN Nardilysin OS=Homo sapiens OX=9606 GN=NRDC PE=1 SV=3	1	9	9	9	3	6	5	6	6	6	7	3	6	5	6	6	6	7	3	6	5	6	6	6	7	8.6	8.6	8.6	131.7	1151	1151	0	19.591	2.147	0.83842	44.552	39	15	Leave out requantified	2.1455	2.1115	2.1513	2.0844
186	sp|O43852|CALU_HUMAN	sp|O43852|CALU_HUMAN	11	11	11	sp|O43852|CALU_HUMAN Calumenin OS=Homo sapiens OX=9606 GN=CALU PE=1 SV=2	1	11	11	11	10	5	7	7	9	6	7	10	5	7	7	9	6	7	10	5	7	7	9	6	7	46.3	46.3	46.3	37.106	315	315	0	99.975	3.0333	1.4783	33.373	61	29	Leave out requantified	3.3072	3.4575	4.2573	4.0523
187	sp|O43854|EDIL3_HUMAN	sp|O43854|EDIL3_HUMAN	3	3	3	sp|O43854|EDIL3_HUMAN EGF-like repeat and discoidin I-like domain-containing protein 3 OS=Homo sapiens OX=9606 GN=EDIL3 PE=1 SV=1	1	3	3	3	0	0	1	3	1	2	1	0	0	1	3	1	2	1	0	0	1	3	1	2	1	7.5	7.5	7.5	53.764	480	480	0	1.8522	1.5568	0.60735	41.608	8	0	Leave out requantified			1.7697	1.5088
188	sp|O60271|JIP4_HUMAN;sp|Q9UPT6|JIP3_HUMAN	sp|O60271|JIP4_HUMAN	17;2	17;2	17;2	sp|O60271|JIP4_HUMAN C-Jun-amino-terminal kinase-interacting protein 4 OS=Homo sapiens OX=9606 GN=SPAG9 PE=1 SV=4	2	17	17	17	9	10	9	9	10	8	9	9	10	9	9	10	8	9	9	10	9	9	10	8	9	18	18	18	146.2	1321	1321;1336	0	42.21	1.1621	0.59616	26.659	54	17	Leave out requantified	0.96343	1.0547	1.4406	1.004
189	sp|O60313|OPA1_HUMAN	sp|O60313|OPA1_HUMAN	6	6	6	sp|O60313|OPA1_HUMAN Dynamin-like 120 kDa protein, mitochondrial OS=Homo sapiens OX=9606 GN=OPA1 PE=1 SV=3	1	6	6	6	4	1	1	2	3	0	0	4	1	1	2	3	0	0	4	1	1	2	3	0	0	7.2	7.2	7.2	111.63	960	960	0	8.6446	1.7916	0.70332	61.228	8	8	Median	1.5157	1.0521		2.2474
190	sp|O60341|KDM1A_HUMAN	sp|O60341|KDM1A_HUMAN	2	2	2	sp|O60341|KDM1A_HUMAN Lysine-specific histone demethylase 1A OS=Homo sapiens OX=9606 GN=KDM1A PE=1 SV=2	1	2	2	2	1	0	1	2	0	0	1	1	0	1	2	0	0	1	1	0	1	2	0	0	1	4.9	4.9	4.9	92.902	852	852	0	5.668	1.1507	0.42489	8.9453	3	3	Plateau	1.1507			1.0984
191	sp|O60443|GSDME_HUMAN	sp|O60443|GSDME_HUMAN	2	2	2	sp|O60443|GSDME_HUMAN Gasdermin-E OS=Homo sapiens OX=9606 GN=GSDME PE=1 SV=2	1	2	2	2	2	0	1	0	0	0	1	2	0	1	0	0	0	1	2	0	1	0	0	0	1	5.2	5.2	5.2	54.554	496	496	0	3.2049	2.0558	0.84862	15.406	3	2	Median	2.0558		2.595
192	sp|O60488|ACSL4_HUMAN	sp|O60488|ACSL4_HUMAN	9	8	8	sp|O60488|ACSL4_HUMAN Long-chain-fatty-acid--CoA ligase 4 OS=Homo sapiens OX=9606 GN=ACSL4 PE=1 SV=2	1	9	8	8	3	2	5	3	4	2	2	2	2	5	3	3	1	1	2	2	5	3	3	1	1	20.8	18.3	18.3	79.187	711	711	0	37.41	1.7877	0.75899	29.057	12	9	Median	2.5238	3.1628	1.5186	2.6053
193	sp|O60493|SNX3_HUMAN	sp|O60493|SNX3_HUMAN	5	5	4	sp|O60493|SNX3_HUMAN Sorting nexin-3 OS=Homo sapiens OX=9606 GN=SNX3 PE=1 SV=3	1	5	5	4	4	2	4	5	3	4	3	4	2	4	5	3	4	3	3	1	3	4	2	3	2	25.3	25.3	21	18.762	162	162	0	4.3033	3.7652	1.7866	25.896	25	19	Leave out requantified	2.1403	2.4127	2.6611	2.7616
194	sp|O60502|OGA_HUMAN	sp|O60502|OGA_HUMAN	3	3	3	sp|O60502|OGA_HUMAN Protein O-GlcNAcase OS=Homo sapiens OX=9606 GN=OGA PE=1 SV=2	1	3	3	3	2	1	2	1	0	1	1	2	1	2	1	0	1	1	2	1	2	1	0	1	1	3.9	3.9	3.9	102.91	916	916	0	3.9424	1.0609	0.47158	109.85	8	8	Median	1.2562	0.060162	1.1567	1.1126
195	sp|O60506|HNRPQ_HUMAN	sp|O60506|HNRPQ_HUMAN	19	13	13	sp|O60506|HNRPQ_HUMAN Heterogeneous nuclear ribonucleoprotein Q OS=Homo sapiens OX=9606 GN=SYNCRIP PE=1 SV=2	1	19	13	13	18	16	11	11	13	16	13	13	11	7	6	7	11	9	13	11	7	6	7	11	9	35.6	26.6	26.6	69.602	623	623	0	117.71	4.0407	1.7108	24.137	68	23	Leave out requantified	4.2771	4.3106	5.1974	3.7698
198	sp|O60568|PLOD3_HUMAN	sp|O60568|PLOD3_HUMAN	2	2	2	sp|O60568|PLOD3_HUMAN Multifunctional procollagen lysine hydroxylase and glycosyltransferase LH3 OS=Homo sapiens OX=9606 GN=PLOD3 PE=1 SV=1	1	2	2	2	1	1	2	1	0	1	1	1	1	2	1	0	1	1	1	1	2	1	0	1	1	3.1	3.1	3.1	84.784	738	738	0	15.307	0.16215	0.059081	99.642	7	7	Median	0.13296	0.11707	0.58784	0.12886
199	sp|O60610|DIAP1_HUMAN	sp|O60610|DIAP1_HUMAN	19	19	19	sp|O60610|DIAP1_HUMAN Protein diaphanous homolog 1 OS=Homo sapiens OX=9606 GN=DIAPH1 PE=1 SV=2	1	19	19	19	10	10	10	12	13	11	12	10	10	10	12	13	11	12	10	10	10	12	13	11	12	17.4	17.4	17.4	141.35	1272	1272	0	77.225	1.7804	0.75378	56.34	80	27	Leave out requantified	1.8237	1.606	2.0045	1.8893
200	sp|O60664|PLIN3_HUMAN	sp|O60664|PLIN3_HUMAN	15	15	15	sp|O60664|PLIN3_HUMAN Perilipin-3 OS=Homo sapiens OX=9606 GN=PLIN3 PE=1 SV=3	1	15	15	15	14	14	12	12	14	14	13	14	14	12	12	14	14	13	14	14	12	12	14	14	13	50.2	50.2	50.2	47.074	434	434	0	308.86	1.5513	0.67348	25.002	119	23	Leave out requantified	1.5507	1.6132	2.0001	1.7131
201	sp|O60684|IMA7_HUMAN;sp|O15131|IMA6_HUMAN	sp|O60684|IMA7_HUMAN;sp|O15131|IMA6_HUMAN	6;5	6;5	2;1	sp|O60684|IMA7_HUMAN Importin subunit alpha-7 OS=Homo sapiens OX=9606 GN=KPNA6 PE=1 SV=1;sp|O15131|IMA6_HUMAN Importin subunit alpha-6 OS=Homo sapiens OX=9606 GN=KPNA5 PE=1 SV=2	2	6	6	2	2	5	2	4	3	2	2	2	5	2	4	3	2	2	1	2	1	1	1	1	1	11.6	11.6	4.7	60.029	536	536;536	0	26.691	2.9139	1.1878	37.118	25	11	Leave out requantified	3.2357	3.4941	4.9085	2.6643
202	sp|O60701|UGDH_HUMAN	sp|O60701|UGDH_HUMAN	4	4	4	sp|O60701|UGDH_HUMAN UDP-glucose 6-dehydrogenase OS=Homo sapiens OX=9606 GN=UGDH PE=1 SV=1	1	4	4	4	1	1	3	2	2	1	1	1	1	3	2	2	1	1	1	1	3	2	2	1	1	10.7	10.7	10.7	55.023	494	494	0	10.366	2.8139	1.2917	24.94	10	8	Median	2.7971	2.8308	2.3268	2.9187
203	sp|O60749|SNX2_HUMAN	sp|O60749|SNX2_HUMAN	9	9	8	sp|O60749|SNX2_HUMAN Sorting nexin-2 OS=Homo sapiens OX=9606 GN=SNX2 PE=1 SV=2	1	9	9	8	4	4	4	2	3	2	3	4	4	4	2	3	2	3	4	4	4	1	3	2	3	20.6	20.6	18.5	58.47	519	519	0	18.123	1.8733	0.8066	11.598	22	4	Leave out requantified	1.9219	1.8377	1.8266	1.6735
204	sp|O60763|USO1_HUMAN;REV__sp|Q5VZ89|DEN4C_HUMAN	sp|O60763|USO1_HUMAN	11;1	11;1	11;1	sp|O60763|USO1_HUMAN General vesicular transport factor p115 OS=Homo sapiens OX=9606 GN=USO1 PE=1 SV=2	2	11	11	11	6	4	5	4	7	6	5	6	4	5	4	7	6	5	6	4	5	4	7	6	5	13	13	13	107.89	962	962;1909	0	26.971	3.3668	1.4932	27.095	30	19	Leave out requantified	2.4954	3.7936	2.4017	2.6382
205	sp|Q99879|H2B1M_HUMAN;sp|Q99877|H2B1N_HUMAN;sp|Q93079|H2B1H_HUMAN;sp|Q5QNW6|H2B2F_HUMAN;sp|P62807|H2B1C_HUMAN;sp|P58876|H2B1D_HUMAN;sp|O60814|H2B1K_HUMAN;sp|Q99880|H2B1L_HUMAN;sp|P57053|H2BFS_HUMAN;sp|Q96A08|H2B1A_HUMAN;sp|A0A2R8Y619|H2BE1_HUMAN	sp|Q99879|H2B1M_HUMAN;sp|Q99877|H2B1N_HUMAN;sp|Q93079|H2B1H_HUMAN;sp|Q5QNW6|H2B2F_HUMAN;sp|P62807|H2B1C_HUMAN;sp|P58876|H2B1D_HUMAN;sp|O60814|H2B1K_HUMAN;sp|Q99880|H2B1L_HUMAN;sp|P57053|H2BFS_HUMAN	9;9;9;9;9;9;9;8;8;4;2	9;9;9;9;9;9;9;8;8;4;2	2;2;2;2;2;2;2;2;2;0;0	sp|Q99879|H2B1M_HUMAN Histone H2B type 1-M OS=Homo sapiens OX=9606 GN=H2BC14 PE=1 SV=3;sp|Q99877|H2B1N_HUMAN Histone H2B type 1-N OS=Homo sapiens OX=9606 GN=H2BC15 PE=1 SV=3;sp|Q93079|H2B1H_HUMAN Histone H2B type 1-H OS=Homo sapiens OX=9606 GN=H2BC9 PE=1 S	11	9	9	2	8	9	7	6	8	9	6	8	9	7	6	8	9	6	1	2	0	1	2	2	2	58.7	58.7	7.9	13.989	126	126;126;126;126;126;126;126;126;126;127;122	0	60.386	2.7253	1.273	25.359	77	14	Leave out requantified	2.8138	2.8129	3.0295	2.8415
207	sp|O60841|IF2P_HUMAN	sp|O60841|IF2P_HUMAN	6	6	6	sp|O60841|IF2P_HUMAN Eukaryotic translation initiation factor 5B OS=Homo sapiens OX=9606 GN=EIF5B PE=1 SV=4	1	6	6	6	2	1	1	1	2	3	1	2	1	1	1	2	3	1	2	1	1	1	2	3	1	8.3	8.3	8.3	138.83	1220	1220	0	39.333	2.7713	1.317	16.625	11	6	Leave out requantified	3.0165	3.3339	6.3535	1.5258
209	sp|Q9BZK7|TBL1R_HUMAN;sp|O60907|TBL1X_HUMAN;sp|Q9BQ87|TBL1Y_HUMAN	sp|Q9BZK7|TBL1R_HUMAN;sp|O60907|TBL1X_HUMAN;sp|Q9BQ87|TBL1Y_HUMAN	2;2;1	2;2;1	2;2;1	sp|Q9BZK7|TBL1R_HUMAN F-box-like/WD repeat-containing protein TBL1XR1 OS=Homo sapiens OX=9606 GN=TBL1XR1 PE=1 SV=1;sp|O60907|TBL1X_HUMAN F-box-like/WD repeat-containing protein TBL1X OS=Homo sapiens OX=9606 GN=TBL1X PE=1 SV=3;sp|Q9BQ87|TBL1Y_HUMAN F-box-li	3	2	2	2	1	0	1	0	0	1	0	1	0	1	0	0	1	0	1	0	1	0	0	1	0	4.5	4.5	4.5	55.594	514	514;577;522	0.0023162	1.5156	3.2805	1.3332	34.067	3	1	Median	3.2805		3.5511
210	sp|O75083|WDR1_HUMAN	sp|O75083|WDR1_HUMAN	32	32	32	sp|O75083|WDR1_HUMAN WD repeat-containing protein 1 OS=Homo sapiens OX=9606 GN=WDR1 PE=1 SV=4	1	32	32	32	19	24	22	22	25	28	23	19	24	22	22	25	28	23	19	24	22	22	25	28	23	72.4	72.4	72.4	66.193	606	606	0	323.31	3.62	1.4462	29.518	209	55	Leave out requantified	3.5741	3.6843	4.1469	3.6363
211	sp|O75116|ROCK2_HUMAN	sp|O75116|ROCK2_HUMAN	2	2	2	sp|O75116|ROCK2_HUMAN Rho-associated protein kinase 2 OS=Homo sapiens OX=9606 GN=ROCK2 PE=1 SV=4	1	2	2	2	1	1	0	0	1	0	0	1	1	0	0	1	0	0	1	1	0	0	1	0	0	2.1	2.1	2.1	160.9	1388	1388	0	2.518	0.86166	0.39831	59.291	3	3	Median	0.86166	0.84503
212	sp|O75131|CPNE3_HUMAN;sp|Q96FN4|CPNE2_HUMAN;sp|Q8IYJ1|CPNE9_HUMAN;sp|Q96A23|CPNE4_HUMAN;sp|O95741|CPNE6_HUMAN;sp|Q86YQ8|CPNE8_HUMAN;sp|Q9HCH3|CPNE5_HUMAN;sp|Q9UBL6|CPNE7_HUMAN	sp|O75131|CPNE3_HUMAN	7;1;1;1;1;1;1;1	7;1;1;1;1;1;1;1	7;1;1;1;1;1;1;1	sp|O75131|CPNE3_HUMAN Copine-3 OS=Homo sapiens OX=9606 GN=CPNE3 PE=1 SV=1	8	7	7	7	2	2	3	1	5	4	2	2	2	3	1	5	4	2	2	2	3	1	5	4	2	15.8	15.8	15.8	60.13	537	537;548;553;557;557;564;593;633	0	12.574	4.3094	1.8179	34.844	12	8	Leave out requantified	4.3274	2.5377	2.3567	3.011
213	sp|O75170|PP6R2_HUMAN	sp|O75170|PP6R2_HUMAN	2	2	2	sp|O75170|PP6R2_HUMAN Serine/threonine-protein phosphatase 6 regulatory subunit 2 OS=Homo sapiens OX=9606 GN=PPP6R2 PE=1 SV=2	1	2	2	2	1	1	2	1	1	0	1	1	1	2	1	1	0	1	1	1	2	1	1	0	1	2.1	2.1	2.1	104.94	966	966	0	2.1008	1.1474	0.49119	52.821	7	1	Median	0.83437	2.205	2.5973	1.1474
214	sp|O75190|DNJB6_HUMAN;sp|Q8WWF6|DNJB3_HUMAN	sp|O75190|DNJB6_HUMAN;sp|Q8WWF6|DNJB3_HUMAN	2;1	2;1	2;1	sp|O75190|DNJB6_HUMAN DnaJ homolog subfamily B member 6 OS=Homo sapiens OX=9606 GN=DNAJB6 PE=1 SV=2;sp|Q8WWF6|DNJB3_HUMAN DnaJ homolog subfamily B member 3 OS=Homo sapiens OX=9606 GN=DNAJB3 PE=1 SV=1	2	2	2	2	0	0	1	1	0	0	1	0	0	1	1	0	0	1	0	0	1	1	0	0	1	11.3	11.3	11.3	36.087	326	326;145	0	14.384	2.4619	0.81179	13.962	3	1	Median			2.4672	2.4619
215	sp|O75223|GGCT_HUMAN	sp|O75223|GGCT_HUMAN	4	4	4	sp|O75223|GGCT_HUMAN Gamma-glutamylcyclotransferase OS=Homo sapiens OX=9606 GN=GGCT PE=1 SV=1	1	4	4	4	2	2	2	2	2	2	4	2	2	2	2	2	2	4	2	2	2	2	2	2	4	22.3	22.3	22.3	21.007	188	188	0	8.0334	1.649	0.7465	22.271	13	4	Leave out requantified	1.4589	0.74616	2.0381	1.2706
217	sp|O75312|ZPR1_HUMAN	sp|O75312|ZPR1_HUMAN	6	6	6	sp|O75312|ZPR1_HUMAN Zinc finger protein ZPR1 OS=Homo sapiens OX=9606 GN=ZPR1 PE=1 SV=1	1	6	6	6	3	4	3	4	2	3	3	3	4	3	4	2	3	3	3	4	3	4	2	3	3	20	20	20	50.925	459	459	0	12.96	1.4369	0.64762	29.58	22	3	Leave out requantified	1.6516	1.7681	1.9589	1.4573
218	sp|O75340|PDCD6_HUMAN	sp|O75340|PDCD6_HUMAN	1	1	1	sp|O75340|PDCD6_HUMAN Programmed cell death protein 6 OS=Homo sapiens OX=9606 GN=PDCD6 PE=1 SV=1	1	1	1	1	1	1	1	1	1	1	1	1	1	1	1	1	1	1	1	1	1	1	1	1	1	5.8	5.8	5.8	21.868	191	191	0	3.3347	1.7994	0.73694	46.374	7	5	Median	2.0442	0.56262	1.9445	1.7994
219	sp|O75352|MPU1_HUMAN	sp|O75352|MPU1_HUMAN	2	2	2	sp|O75352|MPU1_HUMAN Mannose-P-dolichol utilization defect 1 protein OS=Homo sapiens OX=9606 GN=MPDU1 PE=1 SV=2	1	2	2	2	2	0	1	1	1	1	1	2	0	1	1	1	1	1	2	0	1	1	1	1	1	8.1	8.1	8.1	26.638	247	247	0	2.6961	0.71491	0.34472	46.237	7	4	Median	1.0283		0.69877	0.71491
220	sp|O75369|FLNB_HUMAN	sp|O75369|FLNB_HUMAN	166	166	150	sp|O75369|FLNB_HUMAN Filamin-B OS=Homo sapiens OX=9606 GN=FLNB PE=1 SV=2	1	166	166	150	136	142	140	136	140	143	143	136	142	140	136	140	143	143	126	129	127	125	128	131	132	80.6	80.6	76.6	278.16	2602	2602	0	323.31	1.5965	0.71697	30.362	1349	186	Leave out requantified	1.626	1.6552	1.7825	1.7061
221	sp|O75390|CISY_HUMAN	sp|O75390|CISY_HUMAN	15	15	15	sp|O75390|CISY_HUMAN Citrate synthase, mitochondrial OS=Homo sapiens OX=9606 GN=CS PE=1 SV=2	1	15	15	15	11	10	12	9	11	8	8	11	10	12	9	11	8	8	11	10	12	9	11	8	8	47.4	47.4	47.4	51.712	466	466	0	124.72	3.1335	1.228	21.818	73	24	Leave out requantified	3.4225	3.1335	3.9764	3.2422
222	sp|O75396|SC22B_HUMAN	sp|O75396|SC22B_HUMAN	7	7	7	sp|O75396|SC22B_HUMAN Vesicle-trafficking protein SEC22b OS=Homo sapiens OX=9606 GN=SEC22B PE=1 SV=4	1	7	7	7	4	4	5	2	2	4	4	4	4	5	2	2	4	4	4	4	5	2	2	4	4	37.7	37.7	37.7	24.593	215	215	0	34.105	2.9417	1.3557	54.298	24	9	Leave out requantified	3.1087	2.4031	1.8032	3.0697
224	sp|O75436|VP26A_HUMAN;sp|Q4G0F5|VP26B_HUMAN	sp|O75436|VP26A_HUMAN	12;1	12;1	12;1	sp|O75436|VP26A_HUMAN Vacuolar protein sorting-associated protein 26A OS=Homo sapiens OX=9606 GN=VPS26A PE=1 SV=2	2	12	12	12	7	6	4	6	7	5	8	7	6	4	6	7	5	8	7	6	4	6	7	5	8	48.3	48.3	48.3	38.169	327	327;336	0	47.484	2.4354	1.0082	38.537	43	19	Leave out requantified	1.8554	2.5205	3.9233	2.0449
225	sp|O75439|MPPB_HUMAN	sp|O75439|MPPB_HUMAN	3	3	3	sp|O75439|MPPB_HUMAN Mitochondrial-processing peptidase subunit beta OS=Homo sapiens OX=9606 GN=PMPCB PE=1 SV=2	1	3	3	3	2	3	2	2	0	2	0	2	3	2	2	0	2	0	2	3	2	2	0	2	0	9.4	9.4	9.4	54.366	489	489	0	20.699	1.4107	0.69493	77.34	10	10	Median	1.7488	1.6598	1.5159	0.19253
226	sp|O75489|NDUS3_HUMAN	sp|O75489|NDUS3_HUMAN	3	3	3	sp|O75489|NDUS3_HUMAN NADH dehydrogenase [ubiquinone] iron-sulfur protein 3, mitochondrial OS=Homo sapiens OX=9606 GN=NDUFS3 PE=1 SV=1	1	3	3	3	1	2	2	1	1	1	0	1	2	2	1	1	1	0	1	2	2	1	1	1	0	16.3	16.3	16.3	30.241	264	264	0	11.007	0.65914	0.24789	70.69	8	7	Median	0.88984	0.68998	0.63565	0.48824
228	sp|O75521|ECI2_HUMAN	sp|O75521|ECI2_HUMAN	4	4	4	sp|O75521|ECI2_HUMAN Enoyl-CoA delta isomerase 2 OS=Homo sapiens OX=9606 GN=ECI2 PE=1 SV=4	1	4	4	4	0	2	2	2	2	2	1	0	2	2	2	2	2	1	0	2	2	2	2	2	1	11.9	11.9	11.9	43.585	394	394	0	10.019	3.2385	1.4866	0.30141	11	5	Leave out requantified		2.6213	2.9341	1.7498
229	sp|O75531|BAF_HUMAN	sp|O75531|BAF_HUMAN	1	1	1	sp|O75531|BAF_HUMAN Barrier-to-autointegration factor OS=Homo sapiens OX=9606 GN=BANF1 PE=1 SV=1	1	1	1	1	0	1	1	1	1	1	1	0	1	1	1	1	1	1	0	1	1	1	1	1	1	13.5	13.5	13.5	10.058	89	89	0	5.393	2.866	1.1694	8.0882	6	0	Median		2.8179	2.915	3.1709
230	sp|O75533|SF3B1_HUMAN	sp|O75533|SF3B1_HUMAN	17	17	17	sp|O75533|SF3B1_HUMAN Splicing factor 3B subunit 1 OS=Homo sapiens OX=9606 GN=SF3B1 PE=1 SV=3	1	17	17	17	9	7	7	7	7	4	8	9	7	7	7	7	4	8	9	7	7	7	7	4	8	18.9	18.9	18.9	145.83	1304	1304	0	49.11	3.0035	1.5989	37.392	43	29	Leave out requantified	1.4577	2.3171	3.008	1.4385
231	sp|O75534|CSDE1_HUMAN	sp|O75534|CSDE1_HUMAN	15	15	15	sp|O75534|CSDE1_HUMAN Cold shock domain-containing protein E1 OS=Homo sapiens OX=9606 GN=CSDE1 PE=1 SV=2	1	15	15	15	4	4	3	7	5	6	8	4	4	3	7	5	6	8	4	4	3	7	5	6	8	21.7	21.7	21.7	88.884	798	798	0	24.045	3.3879	1.7379	49.869	31	15	Leave out requantified	3.5655	2.9639	3.5218	2.5573
234	sp|O75643|U520_HUMAN	sp|O75643|U520_HUMAN	14	14	14	sp|O75643|U520_HUMAN U5 small nuclear ribonucleoprotein 200 kDa helicase OS=Homo sapiens OX=9606 GN=SNRNP200 PE=1 SV=2	1	14	14	14	4	5	7	3	3	7	6	4	5	7	3	3	7	6	4	5	7	3	3	7	6	8.4	8.4	8.4	244.5	2136	2136	0	41.903	1.0075	0.51982	60.198	28	24	Leave out requantified	2.9372	2.5729	1.7474	1.0857
235	sp|O75663|TIPRL_HUMAN	sp|O75663|TIPRL_HUMAN	5	5	5	sp|O75663|TIPRL_HUMAN TIP41-like protein OS=Homo sapiens OX=9606 GN=TIPRL PE=1 SV=2	1	5	5	5	2	0	2	1	1	3	0	2	0	2	1	1	3	0	2	0	2	1	1	3	0	25.7	25.7	25.7	31.444	272	272	0	9.2667	1.2076	0.59354	13.688	6	2	Leave out requantified	1.5565		1.2195
236	sp|O75694|NU155_HUMAN	sp|O75694|NU155_HUMAN	6	6	6	sp|O75694|NU155_HUMAN Nuclear pore complex protein Nup155 OS=Homo sapiens OX=9606 GN=NUP155 PE=1 SV=1	1	6	6	6	3	2	1	4	2	2	3	3	2	1	4	2	2	3	3	2	1	4	2	2	3	6.2	6.2	6.2	155.2	1391	1391	0	16.615	3.5033	1.2948	68.677	9	9	Median	3.9305	5.2797	3.5033	1.5593
237	sp|O75718|CRTAP_HUMAN	sp|O75718|CRTAP_HUMAN	4	4	4	sp|O75718|CRTAP_HUMAN Cartilage-associated protein OS=Homo sapiens OX=9606 GN=CRTAP PE=1 SV=1	1	4	4	4	3	2	2	4	2	2	3	3	2	2	4	2	2	3	3	2	2	4	2	2	3	14.5	14.5	14.5	46.561	401	401	0	9.1228	2.5581	1.358	120.55	15	11	Median	1.4159	4.6859	0.34888	2.9444
238	sp|O75821|EIF3G_HUMAN	sp|O75821|EIF3G_HUMAN	8	8	8	sp|O75821|EIF3G_HUMAN Eukaryotic translation initiation factor 3 subunit G OS=Homo sapiens OX=9606 GN=EIF3G PE=1 SV=2	1	8	8	8	5	5	5	5	5	5	5	5	5	5	5	5	5	5	5	5	5	5	5	5	5	25	25	25	35.611	320	320	0	32.448	2.6549	1.2427	39.462	40	13	Leave out requantified	2.8062	3.0701	3.7447	3.1786
239	sp|O75822|EIF3J_HUMAN	sp|O75822|EIF3J_HUMAN	4	4	4	sp|O75822|EIF3J_HUMAN Eukaryotic translation initiation factor 3 subunit J OS=Homo sapiens OX=9606 GN=EIF3J PE=1 SV=2	1	4	4	4	2	3	2	2	1	4	3	2	3	2	2	1	4	3	2	3	2	2	1	4	3	24	24	24	29.062	258	258	0	14.379	1.5534	0.77213	105.63	9	1	Leave out requantified	2.3448	1.6442	2.6895	1.4676
240	sp|O75828|CBR3_HUMAN	sp|O75828|CBR3_HUMAN	8	6	6	sp|O75828|CBR3_HUMAN Carbonyl reductase [NADPH] 3 OS=Homo sapiens OX=9606 GN=CBR3 PE=1 SV=3	1	8	6	6	6	4	5	4	4	4	5	4	2	3	2	2	2	3	4	2	3	2	2	2	3	35.7	25.3	25.3	30.85	277	277	0	10.911	1.7304	0.81762	52.353	17	7	Leave out requantified	2.2722	3.0551	4.1895	2.8208
241	sp|O75844|FACE1_HUMAN	sp|O75844|FACE1_HUMAN	6	6	6	sp|O75844|FACE1_HUMAN CAAX prenyl protease 1 homolog OS=Homo sapiens OX=9606 GN=ZMPSTE24 PE=1 SV=2	1	6	6	6	3	3	1	0	3	3	4	3	3	1	0	3	3	4	3	3	1	0	3	3	4	16	16	16	54.812	475	475	0	7.691	1.7251	0.9447	26.168	18	10	Leave out requantified	1.7639	1.528	2.3238
242	sp|O75874|IDHC_HUMAN	sp|O75874|IDHC_HUMAN	16	16	15	sp|O75874|IDHC_HUMAN Isocitrate dehydrogenase [NADP] cytoplasmic OS=Homo sapiens OX=9606 GN=IDH1 PE=1 SV=2	1	16	16	15	7	8	9	8	7	9	7	7	8	9	8	7	9	7	7	8	9	8	7	8	7	49.8	49.8	47.6	46.659	414	414	0	58.741	2.9409	1.2783	12.445	54	23	Leave out requantified	3.1565	2.8783	2.9526	2.6216
243	sp|O75909|CCNK_HUMAN	sp|O75909|CCNK_HUMAN	2	2	2	sp|O75909|CCNK_HUMAN Cyclin-K OS=Homo sapiens OX=9606 GN=CCNK PE=1 SV=2	1	2	2	2	1	1	2	1	1	1	0	1	1	2	1	1	1	0	1	1	2	1	1	1	0	5.5	5.5	5.5	64.239	580	580	0	2.4185	2.094	0.93948	16.767	7	5	Median	2.8667	2.1783	1.9805	2.0242
244	sp|O75915|PRAF3_HUMAN	sp|O75915|PRAF3_HUMAN	6	6	6	sp|O75915|PRAF3_HUMAN PRA1 family protein 3 OS=Homo sapiens OX=9606 GN=ARL6IP5 PE=1 SV=1	1	6	6	6	6	4	3	4	5	3	3	6	4	3	4	5	3	3	6	4	3	4	5	3	3	28.7	28.7	28.7	21.614	188	188	0	136.47	1.7477	0.66161	27.646	33	9	Leave out requantified	1.8482	1.7827	2.1172	1.7776
246	sp|O75955|FLOT1_HUMAN	sp|O75955|FLOT1_HUMAN	5	5	5	sp|O75955|FLOT1_HUMAN Flotillin-1 OS=Homo sapiens OX=9606 GN=FLOT1 PE=1 SV=3	1	5	5	5	1	3	2	2	3	1	2	1	3	2	2	3	1	2	1	3	2	2	3	1	2	16.9	16.9	16.9	47.355	427	427	0	20.588	1.9783	0.89503	28.132	14	14	Median	2.3017	2.0176	1.9656	2.1867
247	sp|O75976|CBPD_HUMAN	sp|O75976|CBPD_HUMAN	6	6	6	sp|O75976|CBPD_HUMAN Carboxypeptidase D OS=Homo sapiens OX=9606 GN=CPD PE=1 SV=2	1	6	6	6	3	4	2	2	2	2	2	3	4	2	2	2	2	2	3	4	2	2	2	2	2	5.1	5.1	5.1	152.93	1380	1380	0	8.2264	1.8454	0.80074	37.354	17	5	Leave out requantified	1.996	2.2461	2.1905	1.2206
248	sp|O76003|GLRX3_HUMAN	sp|O76003|GLRX3_HUMAN	6	6	6	sp|O76003|GLRX3_HUMAN Glutaredoxin-3 OS=Homo sapiens OX=9606 GN=GLRX3 PE=1 SV=2	1	6	6	6	2	2	4	2	0	2	2	2	2	4	2	0	2	2	2	2	4	2	0	2	2	28.7	28.7	28.7	37.432	335	335	0	34.222	1.5857	0.73971	17.862	11	2	Leave out requantified	1.8835	1.4639	2.201	1.5259
249	sp|O76021|RL1D1_HUMAN	sp|O76021|RL1D1_HUMAN	1	1	1	sp|O76021|RL1D1_HUMAN Ribosomal L1 domain-containing protein 1 OS=Homo sapiens OX=9606 GN=RSL1D1 PE=1 SV=3	1	1	1	1	1	0	1	1	0	1	0	1	0	1	1	0	1	0	1	0	1	1	0	1	0	2.7	2.7	2.7	54.972	490	490	0	6.6061	1.5472	0.54564	22.553	4	4	Median	2.1183		1.8514	1.293
250	sp|O76094|SRP72_HUMAN	sp|O76094|SRP72_HUMAN	4	4	4	sp|O76094|SRP72_HUMAN Signal recognition particle subunit SRP72 OS=Homo sapiens OX=9606 GN=SRP72 PE=1 SV=3	1	4	4	4	1	2	2	1	2	1	0	1	2	2	1	2	1	0	1	2	2	1	2	1	0	7.3	7.3	7.3	74.605	671	671	0	4.3483	1.7136	0.75028	37.98	6	6	Median		1.8705	2.4908	1.4933
251	sp|O94760|DDAH1_HUMAN	sp|O94760|DDAH1_HUMAN	5	4	4	sp|O94760|DDAH1_HUMAN N(G),N(G)-dimethylarginine dimethylaminohydrolase 1 OS=Homo sapiens OX=9606 GN=DDAH1 PE=1 SV=3	1	5	4	4	2	3	2	2	5	3	2	1	2	1	1	4	2	1	1	2	1	1	4	2	1	21.8	18.9	18.9	31.121	285	285	0	4.9505	1.6378	0.79277	16.693	12	3	Leave out requantified	2.2298	1.3928	2.1213	1.8213
252	sp|O94776|MTA2_HUMAN	sp|O94776|MTA2_HUMAN	3	3	3	sp|O94776|MTA2_HUMAN Metastasis-associated protein MTA2 OS=Homo sapiens OX=9606 GN=MTA2 PE=1 SV=1	1	3	3	3	1	1	1	2	1	2	1	1	1	1	2	1	2	1	1	1	1	2	1	2	1	4.2	4.2	4.2	75.022	668	668	0	4.9376	3.1602	1.2882	35.667	8	0	Leave out requantified	3.8329	3.9507	3.5289	3.3216
253	sp|O94804|STK10_HUMAN	sp|O94804|STK10_HUMAN	1	1	1	sp|O94804|STK10_HUMAN Serine/threonine-protein kinase 10 OS=Homo sapiens OX=9606 GN=STK10 PE=1 SV=1	1	1	1	1	0	1	1	0	0	1	1	0	1	1	0	0	1	1	0	1	1	0	0	1	1	1.2	1.2	1.2	112.13	968	968	0	4.4733	0.82128	0.33149	72.944	3	3	Median		0.82128
254	sp|O94826|TOM70_HUMAN	sp|O94826|TOM70_HUMAN	7	7	7	sp|O94826|TOM70_HUMAN Mitochondrial import receptor subunit TOM70 OS=Homo sapiens OX=9606 GN=TOMM70 PE=1 SV=1	1	7	7	7	5	1	3	2	3	4	4	5	1	3	2	3	4	4	5	1	3	2	3	4	4	13.7	13.7	13.7	67.454	608	608	0	7.1943	1.8892	0.78851	26.203	17	10	Leave out requantified	1.6396	0.256	0.72756	0.41156
255	sp|O94855|SC24D_HUMAN	sp|O94855|SC24D_HUMAN	4	4	4	sp|O94855|SC24D_HUMAN Protein transport protein Sec24D OS=Homo sapiens OX=9606 GN=SEC24D PE=1 SV=2	1	4	4	4	1	0	2	1	1	0	0	1	0	2	1	1	0	0	1	0	2	1	1	0	0	5.1	5.1	5.1	113.01	1032	1032	0	3.2064	0.34431	0.15207	127.5	4	4	Median			0.29653	0.35147
256	sp|O94905|ERLN2_HUMAN;sp|O75477|ERLN1_HUMAN	sp|O94905|ERLN2_HUMAN;sp|O75477|ERLN1_HUMAN	2;1	2;1	2;1	sp|O94905|ERLN2_HUMAN Erlin-2 OS=Homo sapiens OX=9606 GN=ERLIN2 PE=1 SV=1;sp|O75477|ERLN1_HUMAN Erlin-1 OS=Homo sapiens OX=9606 GN=ERLIN1 PE=1 SV=2	2	2	2	2	1	1	1	1	2	1	1	1	1	1	1	2	1	1	1	1	1	1	2	1	1	7.1	7.1	7.1	37.839	339	339;348	0	10.471	3.0903	1.4197	63.253	7	4	Median	3.6996	3.4858	3.0903	1.9103
258	sp|O94925|GLSK_HUMAN	sp|O94925|GLSK_HUMAN	5	5	5	sp|O94925|GLSK_HUMAN Glutaminase kidney isoform, mitochondrial OS=Homo sapiens OX=9606 GN=GLS PE=1 SV=1	1	5	5	5	3	3	3	1	3	3	2	3	3	3	1	3	3	2	3	3	3	1	3	3	2	11.2	11.2	11.2	73.46	669	669	0	18.045	1.7478	0.71277	41.31	11	10	Median	1.713	1.9098	1.5554
259	sp|O94973|AP2A2_HUMAN	sp|O94973|AP2A2_HUMAN	7	3	3	sp|O94973|AP2A2_HUMAN AP-2 complex subunit alpha-2 OS=Homo sapiens OX=9606 GN=AP2A2 PE=1 SV=2	1	7	3	3	1	6	2	2	4	3	5	0	2	0	0	2	1	2	0	2	0	0	2	1	2	10.9	5.5	5.5	103.96	939	939	0	9.9701	2.4616	1.0144	42.564	7	6	Median		2.9189
260	sp|O94979|SC31A_HUMAN	sp|O94979|SC31A_HUMAN	6	6	6	sp|O94979|SC31A_HUMAN Protein transport protein Sec31A OS=Homo sapiens OX=9606 GN=SEC31A PE=1 SV=3	1	6	6	6	2	1	2	2	2	3	3	2	1	2	2	2	3	3	2	1	2	2	2	3	3	6.1	6.1	6.1	133.01	1220	1220	0	7.2114	1.905	0.81884	177.79	15	12	Median	1.3835	0.056866	0.47908	0.74641
261	sp|O95159|ZFPL1_HUMAN	sp|O95159|ZFPL1_HUMAN	1	1	1	sp|O95159|ZFPL1_HUMAN Zinc finger protein-like 1 OS=Homo sapiens OX=9606 GN=ZFPL1 PE=1 SV=2	1	1	1	1	0	1	0	1	0	0	1	0	1	0	1	0	0	1	0	1	0	1	0	0	1	4.8	4.8	4.8	34.114	310	310	0.0096515	0.99881	3.7322	1.5097	87.615	3	1	Plateau		3.1679		3.7322
262	sp|O95202|LETM1_HUMAN	sp|O95202|LETM1_HUMAN	2	2	2	sp|O95202|LETM1_HUMAN Mitochondrial proton/calcium exchanger protein OS=Homo sapiens OX=9606 GN=LETM1 PE=1 SV=1	1	2	2	2	1	2	1	1	1	1	2	1	2	1	1	1	1	2	1	2	1	1	1	1	2	2.7	2.7	2.7	83.353	739	739	0	4.2236	2.5842	1.1916	25.809	9	7	Median	2.5842	2.325	3.1376	2.8568
263	sp|O95219|SNX4_HUMAN	sp|O95219|SNX4_HUMAN	2	2	2	sp|O95219|SNX4_HUMAN Sorting nexin-4 OS=Homo sapiens OX=9606 GN=SNX4 PE=1 SV=1	1	2	2	2	0	2	0	0	2	1	1	0	2	0	0	2	1	1	0	2	0	0	2	1	1	3.8	3.8	3.8	51.908	450	450	0	2.1708	1.043	0.4567	34.814	5	2	Median		0.93813
265	sp|O95302|FKBP9_HUMAN;sp|Q75LS8|FKB9L_HUMAN	sp|O95302|FKBP9_HUMAN	4;1	4;1	4;1	sp|O95302|FKBP9_HUMAN Peptidyl-prolyl cis-trans isomerase FKBP9 OS=Homo sapiens OX=9606 GN=FKBP9 PE=1 SV=2	2	4	4	4	1	2	2	1	0	1	0	1	2	2	1	0	1	0	1	2	2	1	0	1	0	9.5	9.5	9.5	63.083	570	570;142	0	3.2026	2.6071	1.0511	74.436	6	0	Leave out requantified	3.4219	2.9369	2.7709	3.1781
266	sp|O95336|6PGL_HUMAN	sp|O95336|6PGL_HUMAN	8	8	8	sp|O95336|6PGL_HUMAN 6-phosphogluconolactonase OS=Homo sapiens OX=9606 GN=PGLS PE=1 SV=2	1	8	8	8	4	1	2	4	4	6	1	4	1	2	4	4	6	1	4	1	2	4	4	6	1	47.3	47.3	47.3	27.547	258	258	0	15.594	2.1164	0.85663	28.257	22	9	Leave out requantified	2.1164	1.6153	1.8826	2.0256
268	sp|O95347|SMC2_HUMAN	sp|O95347|SMC2_HUMAN	11	11	11	sp|O95347|SMC2_HUMAN Structural maintenance of chromosomes protein 2 OS=Homo sapiens OX=9606 GN=SMC2 PE=1 SV=2	1	11	11	11	3	5	3	4	3	3	4	3	5	3	4	3	3	4	3	5	3	4	3	3	4	12.9	12.9	12.9	135.65	1197	1197	0	23.37	2.1224	0.8949	58.827	17	15	Median	1.2526	2.5988	1.8933	2.1224
270	sp|O95373|IPO7_HUMAN	sp|O95373|IPO7_HUMAN	18	18	17	sp|O95373|IPO7_HUMAN Importin-7 OS=Homo sapiens OX=9606 GN=IPO7 PE=1 SV=1	1	18	18	17	11	13	10	10	10	10	14	11	13	10	10	10	10	14	10	12	9	9	9	9	13	22.4	22.4	21.5	119.52	1038	1038	0	80.164	3.4486	1.5111	27.498	69	32	Leave out requantified	3.7542	3.3826	4.7643	4.353
271	sp|O95394|AGM1_HUMAN	sp|O95394|AGM1_HUMAN	3	3	3	sp|O95394|AGM1_HUMAN Phosphoacetylglucosamine mutase OS=Homo sapiens OX=9606 GN=PGM3 PE=1 SV=1	1	3	3	3	2	2	2	2	2	2	2	2	2	2	2	2	2	2	2	2	2	2	2	2	2	5	5	5	59.851	542	542	0	2.5247	1.9703	0.84637	46.479	18	13	Leave out requantified	1.8744	2.196	1.8947	1.521
272	sp|O95399|UTS2_HUMAN	sp|O95399|UTS2_HUMAN	1	1	1	sp|O95399|UTS2_HUMAN Urotensin-2 OS=Homo sapiens OX=9606 GN=UTS2 PE=1 SV=1	1	1	1	1	1	0	1	0	1	0	1	1	0	1	0	1	0	1	1	0	1	0	1	0	1	6.5	6.5	6.5	14.295	124	124	0.0056085	1.2775	1.5526	0.64396	7.449	4	1	Median	1.5428		1.5624
273	sp|O95433|AHSA1_HUMAN	sp|O95433|AHSA1_HUMAN	7	7	7	sp|O95433|AHSA1_HUMAN Activator of 90 kDa heat shock protein ATPase homolog 1 OS=Homo sapiens OX=9606 GN=AHSA1 PE=1 SV=1	1	7	7	7	3	5	6	5	4	6	5	3	5	6	5	4	6	5	3	5	6	5	4	6	5	28.1	28.1	28.1	38.274	338	338	0	62.19	2.2166	0.9235	31.32	34	10	Leave out requantified	2.2912	2.2705	2.8825	2.2033
274	sp|O95456|PSMG1_HUMAN	sp|O95456|PSMG1_HUMAN	3	3	3	sp|O95456|PSMG1_HUMAN Proteasome assembly chaperone 1 OS=Homo sapiens OX=9606 GN=PSMG1 PE=1 SV=1	1	3	3	3	1	1	1	1	2	2	3	1	1	1	1	2	2	3	1	1	1	1	2	2	3	12.5	12.5	12.5	32.854	288	288	0	6.75	2.5686	1.2154	14.283	10	0	Leave out requantified	3.0602	2.7127	3.2195	2.9933
276	sp|O95573|ACSL3_HUMAN	sp|O95573|ACSL3_HUMAN	11	11	10	sp|O95573|ACSL3_HUMAN Long-chain-fatty-acid--CoA ligase 3 OS=Homo sapiens OX=9606 GN=ACSL3 PE=1 SV=3	1	11	11	10	6	6	3	6	7	6	7	6	6	3	6	7	6	7	5	6	3	6	6	5	6	23.2	23.2	20.7	80.419	720	720	0	44.738	2.3785	1.1881	35.05	36	28	Leave out requantified	3.5028	2.1451	3.3227	2.0175
277	sp|O95747|OXSR1_HUMAN;sp|Q9UEW8|STK39_HUMAN	sp|O95747|OXSR1_HUMAN	8;1	8;1	8;1	sp|O95747|OXSR1_HUMAN Serine/threonine-protein kinase OSR1 OS=Homo sapiens OX=9606 GN=OXSR1 PE=1 SV=1	2	8	8	8	5	5	1	2	2	5	2	5	5	1	2	2	5	2	5	5	1	2	2	5	2	17.8	17.8	17.8	58.022	527	527;545	0	23.7	4.9109	1.7864	20.921	18	11	Leave out requantified	3.8811	0.86544	4.4241	5.3421
278	sp|O95757|HS74L_HUMAN	sp|O95757|HS74L_HUMAN	10	7	7	sp|O95757|HS74L_HUMAN Heat shock 70 kDa protein 4L OS=Homo sapiens OX=9606 GN=HSPA4L PE=1 SV=3	1	10	7	7	5	4	4	6	8	7	4	4	1	1	3	6	4	2	4	1	1	3	6	4	2	16.7	11.4	11.4	94.511	839	839	0	35.394	1.8015	0.7391	25.057	19	6	Leave out requantified	1.7202	1.7577	0.40855	1.9729
279	sp|O95777|LSM8_HUMAN	sp|O95777|LSM8_HUMAN	2	2	2	sp|O95777|LSM8_HUMAN U6 snRNA-associated Sm-like protein LSm8 OS=Homo sapiens OX=9606 GN=LSM8 PE=1 SV=3	1	2	2	2	0	1	1	0	1	1	0	0	1	1	0	1	1	0	0	1	1	0	1	1	0	27.1	27.1	27.1	10.403	96	96	0.0081477	1.0684	0.92824	0.39003	51.042	4	1	Median		1.1277	2.362
280	sp|O95782|AP2A1_HUMAN	sp|O95782|AP2A1_HUMAN	11	11	7	sp|O95782|AP2A1_HUMAN AP-2 complex subunit alpha-1 OS=Homo sapiens OX=9606 GN=AP2A1 PE=1 SV=3	1	11	11	7	4	9	5	4	6	5	7	4	9	5	4	6	5	7	3	5	3	2	4	3	4	16	16	10.8	107.54	977	977	0	32.396	3.6487	1.5233	34.589	33	27	Leave out requantified	2.8879	2.4588	3.8362	4.0331
281	sp|O95810|CAVN2_HUMAN	sp|O95810|CAVN2_HUMAN	2	2	2	sp|O95810|CAVN2_HUMAN Caveolae-associated protein 2 OS=Homo sapiens OX=9606 GN=CAVIN2 PE=1 SV=3	1	2	2	2	0	1	1	0	1	0	1	0	1	1	0	1	0	1	0	1	1	0	1	0	1	5.9	5.9	5.9	47.173	425	425	0	6.7705	2.1139	0.91597	31.693	4	2	Median		2.2227	1.3999
282	sp|O95816|BAG2_HUMAN	sp|O95816|BAG2_HUMAN	6	6	6	sp|O95816|BAG2_HUMAN BAG family molecular chaperone regulator 2 OS=Homo sapiens OX=9606 GN=BAG2 PE=1 SV=1	1	6	6	6	4	3	3	4	4	3	4	4	3	3	4	4	3	4	4	3	3	4	4	3	4	36.5	36.5	36.5	23.772	211	211	0	21.324	2.3597	0.99865	21.036	24	9	Leave out requantified	2.3184	2.4227	2.9512	2.0302
283	sp|O95831|AIFM1_HUMAN	sp|O95831|AIFM1_HUMAN	8	8	8	sp|O95831|AIFM1_HUMAN Apoptosis-inducing factor 1, mitochondrial OS=Homo sapiens OX=9606 GN=AIFM1 PE=1 SV=1	1	8	8	8	3	3	3	3	1	0	2	3	3	3	3	1	0	2	3	3	3	3	1	0	2	17.3	17.3	17.3	66.9	613	613	0	6.4562	2.4227	1.1193	30.966	14	6	Leave out requantified	1.9762	2.4735	2.516	1.5569
284	sp|O95861|BPNT1_HUMAN	sp|O95861|BPNT1_HUMAN	3	3	3	sp|O95861|BPNT1_HUMAN 3(2),5-bisphosphate nucleotidase 1 OS=Homo sapiens OX=9606 GN=BPNT1 PE=1 SV=1	1	3	3	3	3	3	2	3	1	1	2	3	3	2	3	1	1	2	3	3	2	3	1	1	2	8.4	8.4	8.4	33.392	308	308	0	3.6969	2.4277	0.98303	17.767	15	1	Leave out requantified	2.3916	2.6826	2.759	2.4642
285	sp|O95864|FADS2_HUMAN	sp|O95864|FADS2_HUMAN	4	4	4	sp|O95864|FADS2_HUMAN Acyl-CoA 6-desaturase OS=Homo sapiens OX=9606 GN=FADS2 PE=1 SV=1	1	4	4	4	1	1	1	2	2	1	3	1	1	1	2	2	1	3	1	1	1	2	2	1	3	9.5	9.5	9.5	52.259	444	444	0	6.4924	3.0486	1.3714	96.27	10	9	Median	0.40042	2.2322	2.9685	1.4417
286	sp|O95865|DDAH2_HUMAN	sp|O95865|DDAH2_HUMAN	5	5	4	sp|O95865|DDAH2_HUMAN N(G),N(G)-dimethylarginine dimethylaminohydrolase 2 OS=Homo sapiens OX=9606 GN=DDAH2 PE=1 SV=1	1	5	5	4	2	4	2	3	3	3	2	2	4	2	3	3	3	2	1	3	1	2	2	2	1	24.9	24.9	22.1	29.644	285	285	0	20.186	2.5507	1.1426	17.36	19	10	Leave out requantified	2.4203	2.6817	2.0964	2.7596
290	sp|O96008|TOM40_HUMAN	sp|O96008|TOM40_HUMAN	6	6	6	sp|O96008|TOM40_HUMAN Mitochondrial import receptor subunit TOM40 homolog OS=Homo sapiens OX=9606 GN=TOMM40 PE=1 SV=1	1	6	6	6	3	3	3	3	2	2	2	3	3	3	3	2	2	2	3	3	3	3	2	2	2	32.1	32.1	32.1	37.893	361	361	0	11.28	1.2769	0.61283	50.016	17	14	Leave out requantified	1.2769	1.6846	1.5419	1.5305
291	sp|O96019|ACL6A_HUMAN;sp|O94805|ACL6B_HUMAN	sp|O96019|ACL6A_HUMAN	5;1	5;1	5;1	sp|O96019|ACL6A_HUMAN Actin-like protein 6A OS=Homo sapiens OX=9606 GN=ACTL6A PE=1 SV=1	2	5	5	5	2	4	2	2	3	3	2	2	4	2	2	3	3	2	2	4	2	2	3	3	2	19.6	19.6	19.6	47.46	429	429;426	0	34.352	2.6105	0.99852	7.6933	17	11	Leave out requantified	2.7558	2.2356	3.3876	2.7346
292	sp|P00338|LDHA_HUMAN;sp|Q6ZMR3|LDH6A_HUMAN;sp|P07864|LDHC_HUMAN	sp|P00338|LDHA_HUMAN	27;1;1	27;1;1	25;0;0	sp|P00338|LDHA_HUMAN L-lactate dehydrogenase A chain OS=Homo sapiens OX=9606 GN=LDHA PE=1 SV=2	3	27	27	25	22	22	23	22	23	24	23	22	22	23	22	23	24	23	21	21	22	21	22	22	22	79.8	79.8	74.1	36.688	332	332;332;332	0	323.31	3.0805	1.7409	33.049	292	66	Leave out requantified	3.1155	3.0496	3.3607	3.1648
293	sp|P00367|DHE3_HUMAN;sp|P49448|DHE4_HUMAN	sp|P00367|DHE3_HUMAN;sp|P49448|DHE4_HUMAN	26;17	26;17	26;17	sp|P00367|DHE3_HUMAN Glutamate dehydrogenase 1, mitochondrial OS=Homo sapiens OX=9606 GN=GLUD1 PE=1 SV=2;sp|P49448|DHE4_HUMAN Glutamate dehydrogenase 2, mitochondrial OS=Homo sapiens OX=9606 GN=GLUD2 PE=1 SV=2	2	26	26	26	18	20	17	17	16	22	19	18	20	17	17	16	22	19	18	20	17	17	16	22	19	59.9	59.9	59.9	61.397	558	558;558	0	134.59	2.7676	1.2695	34.769	145	32	Leave out requantified	3.262	3.2238	3.6908	3.333
294	sp|P00374|DYR_HUMAN	sp|P00374|DYR_HUMAN	1	1	1	sp|P00374|DYR_HUMAN Dihydrofolate reductase OS=Homo sapiens OX=9606 GN=DHFR PE=1 SV=2	1	1	1	1	1	1	1	1	0	0	1	1	1	1	1	0	0	1	1	1	1	1	0	0	1	8.6	8.6	8.6	21.452	187	187	0	2.6109	1.116	0.47717	18.756	5	5	Median	0.88941	0.83906	1.1729	1.2083
295	sp|P00387|NB5R3_HUMAN	sp|P00387|NB5R3_HUMAN	11	11	11	sp|P00387|NB5R3_HUMAN NADH-cytochrome b5 reductase 3 OS=Homo sapiens OX=9606 GN=CYB5R3 PE=1 SV=3	1	11	11	11	7	6	8	9	9	9	8	7	6	8	9	9	9	8	7	6	8	9	9	9	8	52.8	52.8	52.8	34.234	301	301	0	137.01	1.6706	0.85765	29.688	64	24	Leave out requantified	1.5221	1.8341	2.364	1.8739
296	sp|P00390|GSHR_HUMAN	sp|P00390|GSHR_HUMAN	2	2	2	sp|P00390|GSHR_HUMAN Glutathione reductase, mitochondrial OS=Homo sapiens OX=9606 GN=GSR PE=1 SV=2	1	2	2	2	1	2	1	1	1	2	2	1	2	1	1	1	2	2	1	2	1	1	1	2	2	6.3	6.3	6.3	56.256	522	522	0	11.296	1.5676	0.61504	46.035	10	7	Median	1.6829	1.9202	1.2105	1.7109
297	sp|P00403|COX2_HUMAN	sp|P00403|COX2_HUMAN	4	4	4	sp|P00403|COX2_HUMAN Cytochrome c oxidase subunit 2 OS=Homo sapiens OX=9606 GN=MT-CO2 PE=1 SV=1	1	4	4	4	3	2	3	3	2	2	3	3	2	3	3	2	2	3	3	2	3	3	2	2	3	23.3	23.3	23.3	25.565	227	227	0	20.722	2.7775	1.1468	41.272	18	14	Leave out requantified	0.56273	0.51896	0.75581	0.53753
298	sp|P00441|SODC_HUMAN	sp|P00441|SODC_HUMAN	2	2	2	sp|P00441|SODC_HUMAN Superoxide dismutase [Cu-Zn] OS=Homo sapiens OX=9606 GN=SOD1 PE=1 SV=2	1	2	2	2	1	1	0	1	0	0	0	1	1	0	1	0	0	0	1	1	0	1	0	0	0	27.9	27.9	27.9	15.936	154	154	0.0091447	1.0309	1.0262	0.49346	142.84	3	2	Median	3.4962	0.22848		1.0262
299	sp|P00491|PNPH_HUMAN	sp|P00491|PNPH_HUMAN	12	12	12	sp|P00491|PNPH_HUMAN Purine nucleoside phosphorylase OS=Homo sapiens OX=9606 GN=PNP PE=1 SV=2	1	12	12	12	7	4	6	6	6	8	7	7	4	6	6	6	8	7	7	4	6	6	6	8	7	55	55	55	32.118	289	289	0	71.736	3.084	1.3531	19.534	44	9	Leave out requantified	3.0171	3.6332	3.581	3.084
300	sp|P00492|HPRT_HUMAN	sp|P00492|HPRT_HUMAN	8	8	8	sp|P00492|HPRT_HUMAN Hypoxanthine-guanine phosphoribosyltransferase OS=Homo sapiens OX=9606 GN=HPRT1 PE=1 SV=2	1	8	8	8	5	7	4	4	4	3	3	5	7	4	4	4	3	3	5	7	4	4	4	3	3	51.4	51.4	51.4	24.579	218	218	0	38.818	2.9063	1.1007	23.91	29	11	Leave out requantified	2.1545	2.8473	2.9666	2.7296
301	sp|P00505|AATM_HUMAN	sp|P00505|AATM_HUMAN	11	11	11	sp|P00505|AATM_HUMAN Aspartate aminotransferase, mitochondrial OS=Homo sapiens OX=9606 GN=GOT2 PE=1 SV=3	1	11	11	11	9	8	8	7	5	8	9	9	8	8	7	5	8	9	9	8	8	7	5	8	9	32.6	32.6	32.6	47.517	430	430	0	58.486	4.2596	1.837	13.098	53	28	Leave out requantified	4.5472	5.5083	4.6006	4.5552
302	sp|P00533|EGFR_HUMAN	sp|P00533|EGFR_HUMAN	11	11	11	sp|P00533|EGFR_HUMAN Epidermal growth factor receptor OS=Homo sapiens OX=9606 GN=EGFR PE=1 SV=2	1	11	11	11	7	8	6	7	5	6	4	7	8	6	7	5	6	4	7	8	6	7	5	6	4	11.7	11.7	11.7	134.28	1210	1210	0	24.608	2.9499	1.111	27.488	38	17	Leave out requantified	3.394	2.4194	2.234	2.0181
303	sp|P00558|PGK1_HUMAN;sp|P07205|PGK2_HUMAN	sp|P00558|PGK1_HUMAN	37;7	37;7	37;7	sp|P00558|PGK1_HUMAN Phosphoglycerate kinase 1 OS=Homo sapiens OX=9606 GN=PGK1 PE=1 SV=3	2	37	37	37	34	34	32	35	33	32	31	34	34	32	35	33	32	31	34	34	32	35	33	32	31	83.7	83.7	83.7	44.614	417	417;417	0	323.31	2.2023	1.0094	24.712	372	47	Leave out requantified	2.278	2.2628	2.4054	2.183
304	sp|P00568|KAD1_HUMAN	sp|P00568|KAD1_HUMAN	5	5	5	sp|P00568|KAD1_HUMAN Adenylate kinase isoenzyme 1 OS=Homo sapiens OX=9606 GN=AK1 PE=1 SV=3	1	5	5	5	3	2	5	3	2	3	3	3	2	5	3	2	3	3	3	2	5	3	2	3	3	28.9	28.9	28.9	21.635	194	194	0	19.435	2.4718	0.97687	19.023	22	7	Leave out requantified	2.6444	2.5856	2.2141	2.3568
305	sp|P01112|RASH_HUMAN;sp|P01116|RASK_HUMAN;sp|P01111|RASN_HUMAN	sp|P01112|RASH_HUMAN;sp|P01116|RASK_HUMAN;sp|P01111|RASN_HUMAN	3;2;2	3;2;2	3;2;2	sp|P01112|RASH_HUMAN GTPase HRas OS=Homo sapiens OX=9606 GN=HRAS PE=1 SV=1;sp|P01116|RASK_HUMAN GTPase KRas OS=Homo sapiens OX=9606 GN=KRAS PE=1 SV=1;sp|P01111|RASN_HUMAN GTPase NRas OS=Homo sapiens OX=9606 GN=NRAS PE=1 SV=1	3	3	3	3	1	2	1	2	2	2	2	1	2	1	2	2	2	2	1	2	1	2	2	2	2	23.8	23.8	23.8	21.298	189	189;189;189	0	20.649	1.9123	0.78917	23.174	12	10	Median	2.047	2.2718	1.9391	1.5816
306	sp|P01130|LDLR_HUMAN	sp|P01130|LDLR_HUMAN	6	6	6	sp|P01130|LDLR_HUMAN Low-density lipoprotein receptor OS=Homo sapiens OX=9606 GN=LDLR PE=1 SV=1	1	6	6	6	2	2	3	3	2	1	3	2	2	3	3	2	1	3	2	2	3	3	2	1	3	10.2	10.2	10.2	95.375	860	860	0	30.116	1.8466	0.68713	22.444	14	6	Leave out requantified	1.7625	1.7546	1.9018	1.5995
307	sp|P01889|HLAB_HUMAN	sp|P01889|HLAB_HUMAN	4	2	2	sp|P01889|HLAB_HUMAN HLA class I histocompatibility antigen, B alpha chain OS=Homo sapiens OX=9606 GN=HLA-B PE=1 SV=3	1	4	2	2	2	2	2	2	2	3	4	2	2	2	2	1	2	2	2	2	2	2	1	2	2	14.9	8.8	8.8	40.46	362	362	0	18.077	1.8562	0.92141	21.448	12	1	Leave out requantified	2.1405	1.4176	2.3261	2.0311
308	sp|P02545|LMNA_HUMAN	sp|P02545|LMNA_HUMAN	42	42	40	sp|P02545|LMNA_HUMAN Prelamin-A/C OS=Homo sapiens OX=9606 GN=LMNA PE=1 SV=1	1	42	42	40	29	28	30	32	31	24	27	29	28	30	32	31	24	27	28	27	30	31	30	24	27	64	64	62.7	74.139	664	664	0	228.84	2.9858	1.3049	28.187	250	65	Leave out requantified	3.0679	3.0828	3.8484	3.4502
310	sp|P02786|TFR1_HUMAN	sp|P02786|TFR1_HUMAN	24	24	24	sp|P02786|TFR1_HUMAN Transferrin receptor protein 1 OS=Homo sapiens OX=9606 GN=TFRC PE=1 SV=2	1	24	24	24	19	18	17	19	16	21	17	19	18	17	19	16	21	17	19	18	17	19	16	21	17	39.6	39.6	39.6	84.87	760	760	0	128.7	2.2186	0.86511	22.724	127	29	Leave out requantified	2.1259	2.0871	2.3959	2.2303
311	sp|P02792|FRIL_HUMAN	sp|P02792|FRIL_HUMAN	8	8	8	sp|P02792|FRIL_HUMAN Ferritin light chain OS=Homo sapiens OX=9606 GN=FTL PE=1 SV=2	1	8	8	8	4	2	5	4	5	7	4	4	2	5	4	5	7	4	4	2	5	4	5	7	4	46.3	46.3	46.3	20.019	175	175	0	19.045	1.7379	0.7274	19.072	35	5	Leave out requantified	1.6496	1.671	1.8691	1.9196
312	sp|P02794|FRIH_HUMAN	sp|P02794|FRIH_HUMAN	7	7	7	sp|P02794|FRIH_HUMAN Ferritin heavy chain OS=Homo sapiens OX=9606 GN=FTH1 PE=1 SV=2	1	7	7	7	4	3	3	5	5	4	3	4	3	3	5	5	4	3	4	3	3	5	5	4	3	44.3	44.3	44.3	21.225	183	183	0	13.271	1.5687	0.7239	4.0843	25	6	Leave out requantified	1.976	1.8945	2.027	1.8144
314	sp|P04040|CATA_HUMAN	sp|P04040|CATA_HUMAN	6	6	6	sp|P04040|CATA_HUMAN Catalase OS=Homo sapiens OX=9606 GN=CAT PE=1 SV=3	1	6	6	6	3	4	2	3	3	3	4	3	4	2	3	3	3	4	3	4	2	3	3	3	4	13.9	13.9	13.9	59.755	527	527	0	18.464	1.8346	1.0052	15.873	18	7	Leave out requantified	1.7768	1.8293	1.7238	1.7625
315	sp|P04062|GLCM_HUMAN	sp|P04062|GLCM_HUMAN	3	3	3	sp|P04062|GLCM_HUMAN Lysosomal acid glucosylceramidase OS=Homo sapiens OX=9606 GN=GBA PE=1 SV=3	1	3	3	3	1	1	2	1	1	1	1	1	1	2	1	1	1	1	1	1	2	1	1	1	1	6.2	6.2	6.2	59.716	536	536	0	5.1332	1.9094	0.82285	22.285	8	3	Leave out requantified	1.0646	2.3428	1.0563	1.624
316	sp|P04075|ALDOA_HUMAN;sp|P05062|ALDOB_HUMAN	sp|P04075|ALDOA_HUMAN	36;1	36;1	29;0	sp|P04075|ALDOA_HUMAN Fructose-bisphosphate aldolase A OS=Homo sapiens OX=9606 GN=ALDOA PE=1 SV=2	2	36	36	29	31	32	29	32	31	28	30	31	32	29	32	31	28	30	26	25	25	28	26	25	26	92.6	92.6	78.8	39.42	364	364;364	0	323.31	3.6642	1.6801	37.036	320	93	Leave out requantified	3.9221	3.7472	4.018	3.5656
317	sp|P04080|CYTB_HUMAN	sp|P04080|CYTB_HUMAN	2	2	2	sp|P04080|CYTB_HUMAN Cystatin-B OS=Homo sapiens OX=9606 GN=CSTB PE=1 SV=2	1	2	2	2	0	0	2	2	2	2	1	0	0	2	2	2	2	1	0	0	2	2	2	2	1	33.7	33.7	33.7	11.139	98	98	0	9.3346	2.0327	0.88544	2.1911	10	4	Leave out requantified			2.2866	1.8296
318	sp|P04083|ANXA1_HUMAN	sp|P04083|ANXA1_HUMAN	31	31	31	sp|P04083|ANXA1_HUMAN Annexin A1 OS=Homo sapiens OX=9606 GN=ANXA1 PE=1 SV=2	1	31	31	31	26	25	27	28	29	24	27	26	25	27	28	29	24	27	26	25	27	28	29	24	27	76.6	76.6	76.6	38.714	346	346	0	323.31	3.2555	1.4989	28.655	285	36	Leave out requantified	3.3595	3.2529	3.5595	3.4333
319	sp|P04114|APOB_HUMAN	sp|P04114|APOB_HUMAN	5	4	4	sp|P04114|APOB_HUMAN Apolipoprotein B-100 OS=Homo sapiens OX=9606 GN=APOB PE=1 SV=2	1	5	4	4	4	4	4	3	2	5	2	3	3	3	2	1	4	1	3	3	3	2	1	4	1	1.1	0.8	0.8	515.6	4563	4563	0	6.6109	0.39109	0.16119	34.986	14	14	Median	0.33469	0.37903	0.29703	0.35278
320	sp|P04156|PRIO_HUMAN	sp|P04156|PRIO_HUMAN	3	3	3	sp|P04156|PRIO_HUMAN Major prion protein OS=Homo sapiens OX=9606 GN=PRNP PE=1 SV=1	1	3	3	3	1	3	2	2	2	2	1	1	3	2	2	2	2	1	1	3	2	2	2	2	1	12.6	12.6	12.6	27.661	253	253	0	23.078	2.3691	0.8615	18.36	14	0	Leave out requantified	2.1348	2.3691	2.516	2.319
321	sp|P04181|OAT_HUMAN	sp|P04181|OAT_HUMAN	14	14	14	sp|P04181|OAT_HUMAN Ornithine aminotransferase, mitochondrial OS=Homo sapiens OX=9606 GN=OAT PE=1 SV=1	1	14	14	14	7	8	5	7	6	9	9	7	8	5	7	6	9	9	7	8	5	7	6	9	9	40.1	40.1	40.1	48.534	439	439	0	99.993	3.838	2.2302	50.271	51	33	Leave out requantified	6.1801	5.7365	3.4606	3.8096
322	sp|P04183|KITH_HUMAN	sp|P04183|KITH_HUMAN	3	3	3	sp|P04183|KITH_HUMAN Thymidine kinase, cytosolic OS=Homo sapiens OX=9606 GN=TK1 PE=1 SV=2	1	3	3	3	0	2	0	1	1	2	0	0	2	0	1	1	2	0	0	2	0	1	1	2	0	19.2	19.2	19.2	25.468	234	234	0.0017432	1.5411	2.1978	1.2001	107.9	6	3	Plateau		1.6563		0.23062
325	sp|P04406|G3P_HUMAN	sp|P04406|G3P_HUMAN	28	28	27	sp|P04406|G3P_HUMAN Glyceraldehyde-3-phosphate dehydrogenase OS=Homo sapiens OX=9606 GN=GAPDH PE=1 SV=3	1	28	28	27	24	22	25	25	24	21	22	24	22	25	25	24	21	22	23	21	24	24	23	20	21	83.3	83.3	81.2	36.053	335	335	0	323.31	3.5102	1.9213	29.747	444	94	Leave out requantified	3.5496	3.4323	3.7404	3.6247
326	sp|P04439|HLAA_HUMAN;sp|P01893|HLAH_HUMAN;sp|P30511|HLAF_HUMAN;sp|P17693|HLAG_HUMAN;sp|P13747|HLAE_HUMAN	sp|P04439|HLAA_HUMAN;sp|P01893|HLAH_HUMAN	8;4;2;1;1	8;4;2;1;1	4;0;0;0;0	sp|P04439|HLAA_HUMAN HLA class I histocompatibility antigen, A alpha chain OS=Homo sapiens OX=9606 GN=HLA-A PE=1 SV=2;sp|P01893|HLAH_HUMAN Putative HLA class I histocompatibility antigen, alpha chain H OS=Homo sapiens OX=9606 GN=HLA-H PE=5 SV=3	5	8	8	4	5	5	6	6	5	5	4	5	5	6	6	5	5	4	3	2	3	4	3	3	1	24.7	24.7	11.2	40.84	365	365;362;346;338;358	0	55.67	1.8506	0.99195	22.626	31	9	Leave out requantified	2.3171	1.8738	2.5702	2.2876
327	sp|P04632|CPNS1_HUMAN;sp|Q96L46|CPNS2_HUMAN	sp|P04632|CPNS1_HUMAN	11;2	11;2	11;2	sp|P04632|CPNS1_HUMAN Calpain small subunit 1 OS=Homo sapiens OX=9606 GN=CAPNS1 PE=1 SV=1	2	11	11	11	8	8	10	9	8	6	8	8	8	10	9	8	6	8	8	8	10	9	8	6	8	69.4	69.4	69.4	28.315	268	268;248	0	148.73	3.2437	1.259	42.803	81	30	Leave out requantified	3.3121	3.1615	3.7345	3.2878
328	sp|P04637|P53_HUMAN	sp|P04637|P53_HUMAN	1	1	1	sp|P04637|P53_HUMAN Cellular tumor antigen p53 OS=Homo sapiens OX=9606 GN=TP53 PE=1 SV=4	1	1	1	1	1	1	1	1	1	1	1	1	1	1	1	1	1	1	1	1	1	1	1	1	1	4.8	4.8	4.8	43.653	393	393	0	11.507	3.912	2.3035	33.038	7	6	Median	4.1047	1.7222	4.0408	3.4037
329	sp|P04792|HSPB1_HUMAN	sp|P04792|HSPB1_HUMAN	11	11	11	sp|P04792|HSPB1_HUMAN Heat shock protein beta-1 OS=Homo sapiens OX=9606 GN=HSPB1 PE=1 SV=2	1	11	11	11	8	8	7	7	8	8	8	8	8	7	7	8	8	8	8	8	7	7	8	8	8	67.3	67.3	67.3	22.782	205	205	0	66.785	1.865	0.80021	32.158	54	10	Leave out requantified	1.8612	1.9541	2.4394	1.7827
330	sp|P04818|TYSY_HUMAN	sp|P04818|TYSY_HUMAN	2	2	2	sp|P04818|TYSY_HUMAN Thymidylate synthase OS=Homo sapiens OX=9606 GN=TYMS PE=1 SV=3	1	2	2	2	1	2	1	0	0	0	2	1	2	1	0	0	0	2	1	2	1	0	0	0	2	9.6	9.6	9.6	35.716	313	313	0	12.904	0.19106	0.065857	30.86	4	4	Median	0.17172	0.14497	0.21259
331	sp|P04843|RPN1_HUMAN	sp|P04843|RPN1_HUMAN	22	22	22	sp|P04843|RPN1_HUMAN Dolichyl-diphosphooligosaccharide--protein glycosyltransferase subunit 1 OS=Homo sapiens OX=9606 GN=RPN1 PE=1 SV=1	1	22	22	22	12	13	11	8	11	10	13	12	13	11	8	11	10	13	12	13	11	8	11	10	13	44.8	44.8	44.8	68.569	607	607	0	71.9	3.2319	1.4716	25.383	86	39	Leave out requantified	3.1554	3.5726	3.5936	3.2328
332	sp|P04844|RPN2_HUMAN	sp|P04844|RPN2_HUMAN	15	15	15	sp|P04844|RPN2_HUMAN Dolichyl-diphosphooligosaccharide--protein glycosyltransferase subunit 2 OS=Homo sapiens OX=9606 GN=RPN2 PE=1 SV=3	1	15	15	15	7	10	10	9	8	10	9	7	10	10	9	8	10	9	7	10	10	9	8	10	9	37.4	37.4	37.4	69.283	631	631	0	148.69	2.6068	1.2303	22.947	76	49	Leave out requantified	0.89467	2.4134	3.3061	1.1528
333	sp|P04899|GNAI2_HUMAN;sp|P63096|GNAI1_HUMAN;sp|P11488|GNAT1_HUMAN;sp|P19087|GNAT2_HUMAN;sp|A8MTJ3|GNAT3_HUMAN;sp|P09471|GNAO_HUMAN	sp|P04899|GNAI2_HUMAN	12;5;2;2;2;2	12;5;2;2;2;2	7;0;0;0;0;0	sp|P04899|GNAI2_HUMAN Guanine nucleotide-binding protein G(i) subunit alpha-2 OS=Homo sapiens OX=9606 GN=GNAI2 PE=1 SV=3	6	12	12	7	6	7	10	8	9	6	8	6	7	10	8	9	6	8	3	4	7	4	5	4	5	45.1	45.1	28.5	40.45	355	355;354;350;354;354;354	0	104.31	2.9571	1.422	22.727	59	34	Leave out requantified	3.5561	3.373	2.2639	4.0857
334	sp|P05023|AT1A1_HUMAN;sp|P13637|AT1A3_HUMAN;sp|P50993|AT1A2_HUMAN;sp|Q13733|AT1A4_HUMAN;sp|P20648|ATP4A_HUMAN;sp|P54707|AT12A_HUMAN	sp|P05023|AT1A1_HUMAN	40;19;17;10;5;5	40;19;17;10;5;5	40;19;17;10;5;5	sp|P05023|AT1A1_HUMAN Sodium/potassium-transporting ATPase subunit alpha-1 OS=Homo sapiens OX=9606 GN=ATP1A1 PE=1 SV=1	6	40	40	40	27	29	26	28	31	28	28	27	29	26	28	31	28	28	27	29	26	28	31	28	28	42	42	42	112.89	1023	1023;1013;1020;1029;1035;1039	0	323.31	2.287	0.94141	21.514	223	77	Leave out requantified	2.3205	2.2631	2.6098	2.4558
335	sp|P05026|AT1B1_HUMAN	sp|P05026|AT1B1_HUMAN	10	10	10	sp|P05026|AT1B1_HUMAN Sodium/potassium-transporting ATPase subunit beta-1 OS=Homo sapiens OX=9606 GN=ATP1B1 PE=1 SV=1	1	10	10	10	9	8	5	8	5	6	6	9	8	5	8	5	6	6	9	8	5	8	5	6	6	35	35	35	35.061	303	303	0	28.05	1.9889	0.99956	38.051	48	14	Leave out requantified	1.904	1.7323	1.7963	1.8729
337	sp|P05091|ALDH2_HUMAN;sp|P00352|AL1A1_HUMAN;sp|P47895|AL1A3_HUMAN;sp|O94788|AL1A2_HUMAN	sp|P05091|ALDH2_HUMAN	16;3;1;1	16;3;1;1	15;2;0;0	sp|P05091|ALDH2_HUMAN Aldehyde dehydrogenase, mitochondrial OS=Homo sapiens OX=9606 GN=ALDH2 PE=1 SV=2	4	16	16	15	10	8	9	7	8	7	6	10	8	9	7	8	7	6	9	8	8	7	8	6	6	32.5	32.5	30.9	56.381	517	517;501;512;518	0	45.786	2.2503	0.92701	19.414	62	19	Leave out requantified	2.3889	2.2974	2.5692	2.3235
338	sp|P05141|ADT2_HUMAN	sp|P05141|ADT2_HUMAN	14	5	5	sp|P05141|ADT2_HUMAN ADP/ATP translocase 2 OS=Homo sapiens OX=9606 GN=SLC25A5 PE=1 SV=7	1	14	5	5	11	12	12	12	10	11	11	4	4	5	3	4	4	4	4	4	5	3	4	4	4	45	19.5	19.5	32.852	298	298	0	18.634	4.8333	1.8855	16.23	35	16	Leave out requantified	4.5635	3.747	5.1934	5.6617
339	sp|P05161|ISG15_HUMAN	sp|P05161|ISG15_HUMAN	5	5	5	sp|P05161|ISG15_HUMAN Ubiquitin-like protein ISG15 OS=Homo sapiens OX=9606 GN=ISG15 PE=1 SV=5	1	5	5	5	3	4	4	4	4	4	4	3	4	4	4	4	4	4	3	4	4	4	4	4	4	41.2	41.2	41.2	17.887	165	165	0	66.44	2.7744	1.1785	14.069	34	20	Leave out requantified	3.0897	3.0077	3.5078	3.224
340	sp|P05198|IF2A_HUMAN	sp|P05198|IF2A_HUMAN	17	17	17	sp|P05198|IF2A_HUMAN Eukaryotic translation initiation factor 2 subunit 1 OS=Homo sapiens OX=9606 GN=EIF2S1 PE=1 SV=3	1	17	17	17	10	12	11	13	9	9	11	10	12	11	13	9	9	11	10	12	11	13	9	9	11	65.1	65.1	65.1	36.112	315	315	0	118.14	2.4718	1.1887	29.557	79	23	Leave out requantified	2.5739	2.5307	2.9182	2.6667
342	sp|P05388|RLA0_HUMAN;sp|Q8NHW5|RLA0L_HUMAN	sp|P05388|RLA0_HUMAN;sp|Q8NHW5|RLA0L_HUMAN	15;9	15;9	15;9	sp|P05388|RLA0_HUMAN 60S acidic ribosomal protein P0 OS=Homo sapiens OX=9606 GN=RPLP0 PE=1 SV=1;sp|Q8NHW5|RLA0L_HUMAN 60S acidic ribosomal protein P0-like OS=Homo sapiens OX=9606 GN=RPLP0P6 PE=5 SV=1	2	15	15	15	11	10	9	10	10	11	12	11	10	9	10	10	11	12	11	10	9	10	10	11	12	58	58	58	34.273	317	317;317	0	99.448	3.1653	1.2626	27.091	82	31	Leave out requantified	3.4913	2.8944	3.2588	3.2369
343	sp|P05455|LA_HUMAN	sp|P05455|LA_HUMAN	19	19	19	sp|P05455|LA_HUMAN Lupus La protein OS=Homo sapiens OX=9606 GN=SSB PE=1 SV=2	1	19	19	19	12	11	14	11	12	11	13	12	11	14	11	12	11	13	12	11	14	11	12	11	13	52.5	52.5	52.5	46.836	408	408	0	91.833	1.8656	1.0079	42.03	85	21	Leave out requantified	1.7303	1.7339	2.4453	1.5685
344	sp|P05556|ITB1_HUMAN	sp|P05556|ITB1_HUMAN	25	25	25	sp|P05556|ITB1_HUMAN Integrin beta-1 OS=Homo sapiens OX=9606 GN=ITGB1 PE=1 SV=2	1	25	25	25	20	17	20	23	22	21	21	20	17	20	23	22	21	21	20	17	20	23	22	21	21	35.7	35.7	35.7	88.414	798	798	0	188.09	1.5582	0.67406	29.251	184	20	Leave out requantified	1.5267	1.5481	1.7326	1.6572
345	sp|P05783|K1C18_HUMAN;CON__H-INV:HIT000015463;CON__Q92764;CON__Q497I4;sp|Q92764|KRT35_HUMAN;CON__A2AB72;CON__O76014;CON__O76013;sp|O76013|KRT36_HUMAN;CON__O76015;sp|O76015|KRT38_HUMAN;sp|Q14532|K1H2_HUMAN;sp|O76014|KRT37_HUMAN;CON__Q14525;CON__Q14532;CON__Q15323;sp|Q15323|K1H1_HUMAN;CON__A2A5Y0;CON__Q9UE12;sp|Q14525|KT33B_HUMAN;CON__REFSEQ:XP_986630	sp|P05783|K1C18_HUMAN	29;2;2;2;2;1;1;1;1;1;1;1;1;1;1;1;1;1;1;1;1	28;2;1;1;1;0;0;0;0;0;0;0;0;0;0;0;0;0;0;0;0	19;2;1;1;1;0;0;0;0;0;0;0;0;0;0;0;0;0;0;0;0	sp|P05783|K1C18_HUMAN Keratin, type I cytoskeletal 18 OS=Homo sapiens OX=9606 GN=KRT18 PE=1 SV=2	21	29	28	19	18	16	16	20	20	19	20	17	15	15	19	19	18	19	12	10	10	13	13	10	12	71.9	70.2	52.8	48.057	430	430;295;425;455;455;453;471;467;467;456;456;448;449;404;448;416;416;416;416;404;476	0	173.24	3.9744	1.8468	21.734	125	46	Leave out requantified	4.4293	3.9727	4.6945	4.2689
346	sp|P05976|MYL1_HUMAN;sp|P08590|MYL3_HUMAN	sp|P05976|MYL1_HUMAN;sp|P08590|MYL3_HUMAN	2;2	2;2	2;2	sp|P05976|MYL1_HUMAN Myosin light chain 1/3, skeletal muscle isoform OS=Homo sapiens OX=9606 GN=MYL1 PE=1 SV=3;sp|P08590|MYL3_HUMAN Myosin light chain 3 OS=Homo sapiens OX=9606 GN=MYL3 PE=1 SV=3	2	2	2	2	1	2	1	1	1	1	2	1	2	1	1	1	1	2	1	2	1	1	1	1	2	8.2	8.2	8.2	21.145	194	194;195	0	9.7413	1.9722	0.97235	20.117	8	2	Leave out requantified	2.2078		2.1376	2.196
349	sp|P06493|CDK1_HUMAN	sp|P06493|CDK1_HUMAN	8	8	7	sp|P06493|CDK1_HUMAN Cyclin-dependent kinase 1 OS=Homo sapiens OX=9606 GN=CDK1 PE=1 SV=3	1	8	8	7	4	3	6	5	4	4	3	4	3	6	5	4	4	3	3	3	5	4	4	4	3	30	30	27.3	34.095	297	297	0	22.993	3.9528	1.5461	37.002	28	15	Leave out requantified	1.9927	3.6936	2.5687	4.3558
350	sp|P06576|ATPB_HUMAN	sp|P06576|ATPB_HUMAN	18	18	18	sp|P06576|ATPB_HUMAN ATP synthase subunit beta, mitochondrial OS=Homo sapiens OX=9606 GN=ATP5F1B PE=1 SV=3	1	18	18	18	15	16	16	15	13	14	15	15	16	16	15	13	14	15	15	16	16	15	13	14	15	51.4	51.4	51.4	56.559	529	529	0	201.93	2.5934	1.1062	26.291	146	41	Leave out requantified	2.7307	2.6772	3.1848	3.2263
351	sp|P06702|S10A9_HUMAN	sp|P06702|S10A9_HUMAN	1	1	1	sp|P06702|S10A9_HUMAN Protein S100-A9 OS=Homo sapiens OX=9606 GN=S100A9 PE=1 SV=1	1	1	1	1	1	1	0	1	0	0	1	1	1	0	1	0	0	1	1	1	0	1	0	0	1	13.2	13.2	13.2	13.242	114	114	0	6.1999	0.53937	0.2227	82.979	5	2	Median	0.32999	0.59013		0.53937
352	sp|P06703|S10A6_HUMAN	sp|P06703|S10A6_HUMAN	8	8	8	sp|P06703|S10A6_HUMAN Protein S100-A6 OS=Homo sapiens OX=9606 GN=S100A6 PE=1 SV=1	1	8	8	8	5	5	6	6	5	6	4	5	5	6	6	5	6	4	5	5	6	6	5	6	4	64.4	64.4	64.4	10.18	90	90	0	33.982	2.3062	1.1319	18.602	43	3	Leave out requantified	2.2241	2.1057	2.3605	2.3558
353	sp|P06730|IF4E_HUMAN;sp|A6NMX2|I4E1B_HUMAN	sp|P06730|IF4E_HUMAN	5;1	5;1	5;1	sp|P06730|IF4E_HUMAN Eukaryotic translation initiation factor 4E OS=Homo sapiens OX=9606 GN=EIF4E PE=1 SV=2	2	5	5	5	5	3	2	3	2	3	1	5	3	2	3	2	3	1	5	3	2	3	2	3	1	21.7	21.7	21.7	25.097	217	217;242	0	12.142	3.1994	1.2153	8.2539	19	7	Leave out requantified	3.3465	1.8671	3.4375	3.2985
354	sp|P06733|ENOA_HUMAN	sp|P06733|ENOA_HUMAN	46	46	43	sp|P06733|ENOA_HUMAN Alpha-enolase OS=Homo sapiens OX=9606 GN=ENO1 PE=1 SV=2	1	46	46	43	38	37	38	38	37	40	37	38	37	38	38	37	40	37	36	35	36	36	35	37	35	85.5	85.5	77	47.168	434	434	0	323.31	3.2956	1.9007	32.297	505	102	Leave out requantified	3.215	3.4284	3.5656	3.4515
355	sp|P06737|PYGL_HUMAN	sp|P06737|PYGL_HUMAN	17	10	9	sp|P06737|PYGL_HUMAN Glycogen phosphorylase, liver form OS=Homo sapiens OX=9606 GN=PYGL PE=1 SV=4	1	17	10	9	8	11	10	7	9	9	7	3	4	4	2	4	5	2	3	4	4	2	3	5	2	22	13.8	12.5	97.147	847	847	0	17.682	1.7324	0.73056	49.987	20	12	Leave out requantified	1.5732	1.583	2.3452	1.3925
356	sp|P06744|G6PI_HUMAN;sp|Q8N196|SIX5_HUMAN	sp|P06744|G6PI_HUMAN	22;1	22;1	17;1	sp|P06744|G6PI_HUMAN Glucose-6-phosphate isomerase OS=Homo sapiens OX=9606 GN=GPI PE=1 SV=4	2	22	22	17	12	12	13	14	13	11	12	12	12	13	14	13	11	12	8	8	8	10	9	7	8	46.8	46.8	37.3	63.146	558	558;739	0	93.943	3.7502	1.6182	21.3	107	50	Leave out requantified	4.4091	3.9003	4.5454	4.112
357	sp|P06748|NPM_HUMAN	sp|P06748|NPM_HUMAN	24	24	24	sp|P06748|NPM_HUMAN Nucleophosmin OS=Homo sapiens OX=9606 GN=NPM1 PE=1 SV=2	1	24	24	24	16	18	15	14	12	16	15	16	18	15	14	12	16	15	16	18	15	14	12	16	15	70.1	70.1	70.1	32.575	294	294	0	323.31	3.0082	1.6651	27.951	160	22	Leave out requantified	3.1278	3.0509	3.3337	3.2188
358	sp|P06753|TPM3_HUMAN;sp|P09493|TPM1_HUMAN	sp|P06753|TPM3_HUMAN	20;9	9;0	8;0	sp|P06753|TPM3_HUMAN Tropomyosin alpha-3 chain OS=Homo sapiens OX=9606 GN=TPM3 PE=1 SV=2	2	20	9	8	17	17	14	14	13	15	14	7	7	6	5	5	6	6	6	7	6	5	5	6	6	42.5	25.3	22.8	32.95	285	285;284	0	27.269	1.8434	1.1597	39.399	43	11	Leave out requantified	1.8434	1.7458	1.888	1.9176
359	sp|P06756|ITAV_HUMAN	sp|P06756|ITAV_HUMAN	2	2	2	sp|P06756|ITAV_HUMAN Integrin alpha-V OS=Homo sapiens OX=9606 GN=ITGAV PE=1 SV=2	1	2	2	2	0	0	0	1	2	1	0	0	0	0	1	2	1	0	0	0	0	1	2	1	0	2	2	2	116.04	1048	1048	0	5.9293	1.7074	0.7363	34.512	4	2	Linear				0.76342
360	sp|Q16778|H2B2E_HUMAN;sp|P33778|H2B1B_HUMAN;sp|P23527|H2B1O_HUMAN;sp|P06899|H2B1J_HUMAN;sp|Q8N257|H2B3B_HUMAN;sp|Q6DRA6|H2B2D_HUMAN;sp|Q6DN03|H2B2C_HUMAN	sp|Q16778|H2B2E_HUMAN;sp|P33778|H2B1B_HUMAN;sp|P23527|H2B1O_HUMAN;sp|P06899|H2B1J_HUMAN;sp|Q8N257|H2B3B_HUMAN	9;9;9;9;7;4;4	2;2;2;2;2;2;2	2;2;2;2;2;2;2	sp|Q16778|H2B2E_HUMAN Histone H2B type 2-E OS=Homo sapiens OX=9606 GN=H2BC21 PE=1 SV=3;sp|P33778|H2B1B_HUMAN Histone H2B type 1-B OS=Homo sapiens OX=9606 GN=H2BC3 PE=1 SV=2;sp|P23527|H2B1O_HUMAN Histone H2B type 1-O OS=Homo sapiens OX=9606 GN=H2BC17 PE=1 S	7	9	2	2	7	7	9	6	6	8	5	0	0	2	1	0	1	1	0	0	2	1	0	1	1	58.7	7.9	7.9	13.92	126	126;126;126;126;126;164;193	0	2.267	3.6513	1.3235	27.482	5	4	Plateau			3.2089	1.7003
361	sp|P07099|HYEP_HUMAN	sp|P07099|HYEP_HUMAN	10	10	10	sp|P07099|HYEP_HUMAN Epoxide hydrolase 1 OS=Homo sapiens OX=9606 GN=EPHX1 PE=1 SV=1	1	10	10	10	5	4	3	6	5	6	6	5	4	3	6	5	6	6	5	4	3	6	5	6	6	32.1	32.1	32.1	52.948	455	455	0	21.796	1.7016	0.66622	27.487	35	11	Leave out requantified	1.7589	1.7387	1.6988	1.9488
362	sp|P07195|LDHB_HUMAN	sp|P07195|LDHB_HUMAN	21	19	19	sp|P07195|LDHB_HUMAN L-lactate dehydrogenase B chain OS=Homo sapiens OX=9606 GN=LDHB PE=1 SV=2	1	21	19	19	17	16	18	18	19	18	17	16	15	17	17	18	16	16	16	15	17	17	18	16	16	53	47.3	47.3	36.638	334	334	0	209.52	2.2881	1.1753	30.455	186	20	Leave out requantified	2.4517	2.4764	2.4293	2.3454
363	sp|P07203|GPX1_HUMAN	sp|P07203|GPX1_HUMAN	3	3	3	sp|P07203|GPX1_HUMAN Glutathione peroxidase 1 OS=Homo sapiens OX=9606 GN=GPX1 PE=1 SV=4	1	3	3	3	0	2	1	2	1	2	0	0	2	1	2	1	2	0	0	2	1	2	1	2	0	23.2	23.2	23.2	22.088	203	203	0	5.2041	1.4196	0.64633	41.943	8	3	Median		1.5932	2.6961	1.7514
364	sp|P07237|PDIA1_HUMAN	sp|P07237|PDIA1_HUMAN	39	39	39	sp|P07237|PDIA1_HUMAN Protein disulfide-isomerase OS=Homo sapiens OX=9606 GN=P4HB PE=1 SV=3	1	39	39	39	30	27	33	30	33	30	32	30	27	33	30	33	30	32	30	27	33	30	33	30	32	71.9	71.9	71.9	57.116	508	508	0	323.31	1.7969	0.80801	24.885	320	25	Leave out requantified	1.9024	1.8748	2.0535	1.9992
365	sp|P07339|CATD_HUMAN	sp|P07339|CATD_HUMAN	20	20	20	sp|P07339|CATD_HUMAN Cathepsin D OS=Homo sapiens OX=9606 GN=CTSD PE=1 SV=1	1	20	20	20	16	18	18	19	17	17	17	16	18	18	19	17	17	17	16	18	18	19	17	17	17	50	50	50	44.552	412	412	0	253.19	1.9799	0.87212	29.834	198	16	Leave out requantified	2.0137	1.9037	2.1081	2.0995
366	sp|P07355|ANXA2_HUMAN;sp|A6NMY6|AXA2L_HUMAN	sp|P07355|ANXA2_HUMAN;sp|A6NMY6|AXA2L_HUMAN	33;24	33;24	33;24	sp|P07355|ANXA2_HUMAN Annexin A2 OS=Homo sapiens OX=9606 GN=ANXA2 PE=1 SV=2;sp|A6NMY6|AXA2L_HUMAN Putative annexin A2-like protein OS=Homo sapiens OX=9606 GN=ANXA2P2 PE=5 SV=2	2	33	33	33	26	28	29	30	26	27	27	26	28	29	30	26	27	27	26	28	29	30	26	27	27	74.6	74.6	74.6	38.604	339	339;339	0	323.31	3.0163	1.4232	28.136	285	54	Leave out requantified	3.075	2.9522	3.3213	3.1414
367	sp|P07384|CAN1_HUMAN	sp|P07384|CAN1_HUMAN	18	18	18	sp|P07384|CAN1_HUMAN Calpain-1 catalytic subunit OS=Homo sapiens OX=9606 GN=CAPN1 PE=1 SV=1	1	18	18	18	10	12	9	10	11	14	13	10	12	9	10	11	14	13	10	12	9	10	11	14	13	31.5	31.5	31.5	81.889	714	714	0	58.506	2.5332	1.1352	24.748	74	36	Leave out requantified	2.9642	2.6735	3.5091	2.8101
368	sp|P07437|TBB5_HUMAN;sp|A6NNZ2|TBB8B_HUMAN;sp|Q9H4B7|TBB1_HUMAN;CON__ENSEMBL:ENSBTAP00000025008	sp|P07437|TBB5_HUMAN	25;8;5;5	6;0;0;0	5;0;0;0	sp|P07437|TBB5_HUMAN Tubulin beta chain OS=Homo sapiens OX=9606 GN=TUBB PE=1 SV=2	4	25	6	5	22	23	24	23	22	21	22	4	4	5	5	4	5	6	3	3	4	4	3	4	5	63.7	20.3	16.9	49.67	444	444;444;451;536	0	136.52	5.4775	2.8687	34.765	69	18	Leave out requantified	5.8066	5.8302	7.3404	6.2339
369	sp|P07602|SAP_HUMAN	sp|P07602|SAP_HUMAN	3	3	3	sp|P07602|SAP_HUMAN Prosaposin OS=Homo sapiens OX=9606 GN=PSAP PE=1 SV=2	1	3	3	3	1	1	2	2	3	0	1	1	1	2	2	3	0	1	1	1	2	2	3	0	1	6.5	6.5	6.5	58.112	524	524	0	5.0905	1.0194	0.48273	38.628	10	2	Leave out requantified	0.97072	1.1775	1.2247	0.94399
371	sp|P07737|PROF1_HUMAN;CON__P02584	sp|P07737|PROF1_HUMAN	14;4	14;4	14;4	sp|P07737|PROF1_HUMAN Profilin-1 OS=Homo sapiens OX=9606 GN=PFN1 PE=1 SV=2	2	14	14	14	12	12	12	13	12	12	13	12	12	12	13	12	12	13	12	12	12	13	12	12	13	79.3	79.3	79.3	15.054	140	140;140	0	150.92	3.3881	1.8583	24.977	183	26	Leave out requantified	3.4796	3.2053	3.8156	3.3704
372	sp|P07741|APT_HUMAN	sp|P07741|APT_HUMAN	3	3	3	sp|P07741|APT_HUMAN Adenine phosphoribosyltransferase OS=Homo sapiens OX=9606 GN=APRT PE=1 SV=2	1	3	3	3	3	2	1	1	2	2	1	3	2	1	1	2	2	1	3	2	1	1	2	2	1	25.6	25.6	25.6	19.608	180	180	0	28.117	1.1976	0.5411	13.658	7	0	Median	1.2745	1.3779	1.2061	1.1976
373	sp|P07814|SYEP_HUMAN	sp|P07814|SYEP_HUMAN	19	19	19	sp|P07814|SYEP_HUMAN Bifunctional glutamate/proline--tRNA ligase OS=Homo sapiens OX=9606 GN=EPRS1 PE=1 SV=5	1	19	19	19	11	10	12	9	7	9	9	11	10	12	9	7	9	9	11	10	12	9	7	9	9	18.1	18.1	18.1	170.59	1512	1512	0	59.697	3.9568	1.7112	61.487	51	32	Leave out requantified	3.0162	2.8209	3.0594	4.0169
374	sp|P07858|CATB_HUMAN	sp|P07858|CATB_HUMAN	6	6	6	sp|P07858|CATB_HUMAN Cathepsin B OS=Homo sapiens OX=9606 GN=CTSB PE=1 SV=3	1	6	6	6	4	4	2	2	4	6	6	4	4	2	2	4	6	6	4	4	2	2	4	6	6	24.2	24.2	24.2	37.821	339	339	0	28.859	2.0906	0.80253	28.525	24	4	Leave out requantified	2.086	2.101	1.3055	1.4628
375	sp|P07900|HS90A_HUMAN;sp|Q58FG0|HS905_HUMAN;sp|Q14568|HS902_HUMAN;sp|Q58FG1|HS904_HUMAN	sp|P07900|HS90A_HUMAN	65;10;9;2	43;6;3;1	43;6;3;1	sp|P07900|HS90A_HUMAN Heat shock protein HSP 90-alpha OS=Homo sapiens OX=9606 GN=HSP90AA1 PE=1 SV=5	4	65	43	43	60	58	61	59	58	57	56	39	38	41	38	39	37	37	39	38	41	38	39	37	37	66.1	46.3	46.3	84.659	732	732;334;343;418	0	323.31	1.5488	0.8213	40.162	473	32	Leave out requantified	1.5363	1.5546	1.7283	1.633
376	sp|P07910|HNRPC_HUMAN;sp|P0DMR1|HNRC4_HUMAN;sp|O60812|HNRC1_HUMAN;sp|B7ZW38|HNRC3_HUMAN;sp|B2RXH8|HNRC2_HUMAN;sp|Q86SE5|RALYL_HUMAN	sp|P07910|HNRPC_HUMAN	14;6;6;6;6;1	14;6;6;6;6;1	14;6;6;6;6;1	sp|P07910|HNRPC_HUMAN Heterogeneous nuclear ribonucleoproteins C1/C2 OS=Homo sapiens OX=9606 GN=HNRNPC PE=1 SV=4	6	14	14	14	10	12	12	12	12	12	13	10	12	12	12	12	12	13	10	12	12	12	12	12	13	42.5	42.5	42.5	33.67	306	306;293;293;293;293;291	0	72.91	4.4599	2.1192	40.304	116	33	Leave out requantified	4.5096	4.7594	5.6223	5.2431
378	sp|P07954|FUMH_HUMAN	sp|P07954|FUMH_HUMAN	16	16	16	sp|P07954|FUMH_HUMAN Fumarate hydratase, mitochondrial OS=Homo sapiens OX=9606 GN=FH PE=1 SV=3	1	16	16	16	7	8	8	7	11	7	11	7	8	8	7	11	7	11	7	8	8	7	11	7	11	44.3	44.3	44.3	54.636	510	510	0	98.583	2.7187	1.1991	25.483	63	16	Leave out requantified	3.1649	2.9514	3.3084	2.7577
380	sp|P08133|ANXA6_HUMAN	sp|P08133|ANXA6_HUMAN	45	45	45	sp|P08133|ANXA6_HUMAN Annexin A6 OS=Homo sapiens OX=9606 GN=ANXA6 PE=1 SV=3	1	45	45	45	32	34	31	31	31	34	32	32	34	31	31	31	34	32	32	34	31	31	31	34	32	68.5	68.5	68.5	75.872	673	673	0	295.37	2.1408	0.8983	18.481	263	44	Leave out requantified	2.3083	2.2891	2.3613	2.2323
382	sp|P08174|DAF_HUMAN	sp|P08174|DAF_HUMAN	2	2	2	sp|P08174|DAF_HUMAN Complement decay-accelerating factor OS=Homo sapiens OX=9606 GN=CD55 PE=1 SV=4	1	2	2	2	2	1	0	1	0	1	0	2	1	0	1	0	1	0	2	1	0	1	0	1	0	4.2	4.2	4.2	41.4	381	381	0.0065538	1.0909	0.4379	0.22682	71.392	5	1	Median	0.82842	0.59167		0.32348
383	sp|P08195|4F2_HUMAN	sp|P08195|4F2_HUMAN	13	13	13	sp|P08195|4F2_HUMAN 4F2 cell-surface antigen heavy chain OS=Homo sapiens OX=9606 GN=SLC3A2 PE=1 SV=3	1	13	13	13	8	6	8	9	6	9	7	8	6	8	9	6	9	7	8	6	8	9	6	9	7	27.6	27.6	27.6	67.993	630	630	0	57.136	1.9718	0.97023	42.017	52	18	Leave out requantified	1.9397	1.989	2.2029	1.9722
385	sp|P08238|HS90B_HUMAN;sp|Q58FF7|H90B3_HUMAN	sp|P08238|HS90B_HUMAN	67;28	67;28	36;10	sp|P08238|HS90B_HUMAN Heat shock protein HSP 90-beta OS=Homo sapiens OX=9606 GN=HSP90AB1 PE=1 SV=4	2	67	67	36	60	59	61	61	57	57	56	60	59	61	61	57	57	56	31	31	33	32	30	31	30	74.3	74.3	46.1	83.263	724	724;597	0	323.31	1.6345	0.9786	40.02	753	79	Leave out requantified	1.639	1.637	1.7844	1.7205
386	sp|P08243|ASNS_HUMAN	sp|P08243|ASNS_HUMAN	5	5	5	sp|P08243|ASNS_HUMAN Asparagine synthetase [glutamine-hydrolyzing] OS=Homo sapiens OX=9606 GN=ASNS PE=1 SV=4	1	5	5	5	4	5	4	4	3	4	3	4	5	4	4	3	4	3	4	5	4	4	3	4	3	12.3	12.3	12.3	64.369	561	561	0	16.614	4.2971	2.0945	37.515	21	15	Leave out requantified	4.2205	2.4936	6.6286	5.4038
387	sp|P08559|ODPA_HUMAN;sp|P29803|ODPAT_HUMAN	sp|P08559|ODPA_HUMAN	10;1	10;1	10;1	sp|P08559|ODPA_HUMAN Pyruvate dehydrogenase E1 component subunit alpha, somatic form, mitochondrial OS=Homo sapiens OX=9606 GN=PDHA1 PE=1 SV=3	2	10	10	10	4	6	4	8	3	4	4	4	6	4	8	3	4	4	4	6	4	8	3	4	4	40	40	40	43.295	390	390;388	0	35.912	3.4915	1.2632	18.284	33	15	Leave out requantified	2.6517	3.5385	0.89778	3.4113
389	sp|P08579|RU2B_HUMAN	sp|P08579|RU2B_HUMAN	3	3	2	sp|P08579|RU2B_HUMAN U2 small nuclear ribonucleoprotein B OS=Homo sapiens OX=9606 GN=SNRPB2 PE=1 SV=1	1	3	3	2	2	1	1	1	3	1	0	2	1	1	1	3	1	0	1	1	0	0	2	1	0	16.4	16.4	13.3	25.486	225	225	0	4.7594	2.2893	0.99381	97.025	9	7	Median	2.3986	2.2592	2.2893	2.3716
390	sp|P08621|RU17_HUMAN	sp|P08621|RU17_HUMAN	8	8	8	sp|P08621|RU17_HUMAN U1 small nuclear ribonucleoprotein 70 kDa OS=Homo sapiens OX=9606 GN=SNRNP70 PE=1 SV=2	1	8	8	8	5	6	2	4	2	2	4	5	6	2	4	2	2	4	5	6	2	4	2	2	4	19	19	19	51.556	437	437	0	12.663	2.1793	1.1082	35.993	21	18	Median	1.7426	2.0167	3.0247	2.3401
391	sp|P08670|VIME_HUMAN;sp|P17661|DESM_HUMAN;sp|P41219|PERI_HUMAN;sp|P14136|GFAP_HUMAN;sp|Q16352|AINX_HUMAN;sp|P07197|NFM_HUMAN;sp|P78386|KRT85_HUMAN;CON__P78386;sp|P07196|NFL_HUMAN;sp|P12036|NFH_HUMAN	sp|P08670|VIME_HUMAN	57;6;4;2;2;2;1;1;1;1	57;6;4;2;2;2;1;1;1;1	54;4;2;1;2;2;0;0;1;1	sp|P08670|VIME_HUMAN Vimentin OS=Homo sapiens OX=9606 GN=VIM PE=1 SV=4	10	57	57	54	43	42	50	46	44	44	42	43	42	50	46	44	44	42	40	39	48	43	41	41	39	89.3	89.3	86.1	53.651	466	466;470;470;432;499;916;507;507;543;1026	0	323.31	4.4598	2.2478	37.908	454	103	Leave out requantified	4.4361	4.7122	5.7399	5.0167
392	sp|P08708|RS17_HUMAN	sp|P08708|RS17_HUMAN	8	8	8	sp|P08708|RS17_HUMAN 40S ribosomal protein S17 OS=Homo sapiens OX=9606 GN=RPS17 PE=1 SV=2	1	8	8	8	6	5	6	6	7	6	6	6	5	6	6	7	6	6	6	5	6	6	7	6	6	60	60	60	15.55	135	135	0	121.74	3.8746	1.819	18.982	61	30	Leave out requantified	4.0957	3.9255	4.5469	4.2361
393	sp|P08754|GNAI3_HUMAN	sp|P08754|GNAI3_HUMAN	7	2	2	sp|P08754|GNAI3_HUMAN Guanine nucleotide-binding protein G(i) subunit alpha-3 OS=Homo sapiens OX=9606 GN=GNAI3 PE=1 SV=3	1	7	2	2	4	4	5	5	4	3	5	1	1	2	1	0	1	2	1	1	2	1	0	1	2	25.7	9	9	40.532	354	354	0	11.059	1.9059	0.83111	39.156	6	5	Median	2.2964	2.0066		2.0956
394	sp|P08758|ANXA5_HUMAN	sp|P08758|ANXA5_HUMAN	31	31	31	sp|P08758|ANXA5_HUMAN Annexin A5 OS=Homo sapiens OX=9606 GN=ANXA5 PE=1 SV=2	1	31	31	31	24	24	24	24	25	25	25	24	24	24	24	25	25	25	24	24	24	24	25	25	25	79.1	79.1	79.1	35.936	320	320	0	323.31	2.4849	1.1886	29.92	223	43	Leave out requantified	2.4886	2.4543	2.6928	2.5787
395	sp|P08865|RSSA_HUMAN	sp|P08865|RSSA_HUMAN	13	13	13	sp|P08865|RSSA_HUMAN 40S ribosomal protein SA OS=Homo sapiens OX=9606 GN=RPSA PE=1 SV=4	1	13	13	13	12	11	11	10	11	11	12	12	11	11	10	11	11	12	12	11	11	10	11	11	12	58.6	58.6	58.6	32.854	295	295	0	186.89	3.0717	1.2778	31.014	103	33	Leave out requantified	3.244	3.2752	3.4626	3.0969
396	sp|P08962|CD63_HUMAN	sp|P08962|CD63_HUMAN	4	4	4	sp|P08962|CD63_HUMAN CD63 antigen OS=Homo sapiens OX=9606 GN=CD63 PE=1 SV=2	1	4	4	4	3	4	2	3	4	3	3	3	4	2	3	4	3	3	3	4	2	3	4	3	3	17.6	17.6	17.6	25.636	238	238	0	33.081	1.3481	0.61872	16.698	29	1	Leave out requantified	1.5132	1.2967	1.6705	1.3825
397	sp|P09012|SNRPA_HUMAN	sp|P09012|SNRPA_HUMAN	3	2	2	sp|P09012|SNRPA_HUMAN U1 small nuclear ribonucleoprotein A OS=Homo sapiens OX=9606 GN=SNRPA PE=1 SV=3	1	3	2	2	2	0	1	1	1	2	1	1	0	0	0	0	2	1	1	0	0	0	0	2	1	15.6	13.1	13.1	31.279	282	282	0	3.5365	1.6464	0.85612	29.91	4	0	Leave out requantified	1.7061
398	sp|P09104|ENOG_HUMAN	sp|P09104|ENOG_HUMAN	16	13	13	sp|P09104|ENOG_HUMAN Gamma-enolase OS=Homo sapiens OX=9606 GN=ENO2 PE=1 SV=3	1	16	13	13	11	9	10	7	10	10	8	9	7	8	5	8	7	6	9	7	8	5	8	7	6	64.3	51.6	51.6	47.268	434	434	0	131.8	2.4276	1.0013	39.629	48	26	Leave out requantified	2.8562	3.0724	2.8497	3.0675
399	sp|P09110|THIK_HUMAN	sp|P09110|THIK_HUMAN	1	1	1	sp|P09110|THIK_HUMAN 3-ketoacyl-CoA thiolase, peroxisomal OS=Homo sapiens OX=9606 GN=ACAA1 PE=1 SV=2	1	1	1	1	0	0	1	1	1	0	1	0	0	1	1	1	0	1	0	0	1	1	1	0	1	5	5	5	44.292	424	424	0	2.0693	0.71723	0.34771	7.1826	3	3	Median				0.74762
401	sp|P09211|GSTP1_HUMAN	sp|P09211|GSTP1_HUMAN	12	12	12	sp|P09211|GSTP1_HUMAN Glutathione S-transferase P OS=Homo sapiens OX=9606 GN=GSTP1 PE=1 SV=2	1	12	12	12	9	11	8	11	9	10	10	9	11	8	11	9	10	10	9	11	8	11	9	10	10	69.5	69.5	69.5	23.356	210	210	0	323.31	1.9848	1.1672	28.243	91	9	Leave out requantified	2.0232	2.2208	2.747	2.3907
402	sp|P09382|LEG1_HUMAN	sp|P09382|LEG1_HUMAN	10	10	10	sp|P09382|LEG1_HUMAN Galectin-1 OS=Homo sapiens OX=9606 GN=LGALS1 PE=1 SV=2	1	10	10	10	8	9	9	9	9	9	8	8	9	9	9	9	9	8	8	9	9	9	9	9	8	94.1	94.1	94.1	14.716	135	135	0	140.33	1.7396	0.77682	16.969	83	14	Leave out requantified	1.8229	1.7889	1.7913	1.837
403	sp|P09417|DHPR_HUMAN	sp|P09417|DHPR_HUMAN	1	1	1	sp|P09417|DHPR_HUMAN Dihydropteridine reductase OS=Homo sapiens OX=9606 GN=QDPR PE=1 SV=2	1	1	1	1	1	1	1	1	1	0	0	1	1	1	1	1	0	0	1	1	1	1	1	0	0	5.3	5.3	5.3	25.789	244	244	0	2.803	0.29153	0.12221	5.433	5	5	Median	0.28143	0.31036	0.27817	0.29153
404	sp|P09429|HMGB1_HUMAN;sp|B2RPK0|HGB1A_HUMAN;sp|P26583|HMGB2_HUMAN	sp|P09429|HMGB1_HUMAN;sp|B2RPK0|HGB1A_HUMAN	7;4;2	7;4;2	5;2;2	sp|P09429|HMGB1_HUMAN High mobility group protein B1 OS=Homo sapiens OX=9606 GN=HMGB1 PE=1 SV=3;sp|B2RPK0|HGB1A_HUMAN Putative high mobility group protein B1-like 1 OS=Homo sapiens OX=9606 GN=HMGB1P1 PE=5 SV=1	3	7	7	5	5	3	3	6	4	2	3	5	3	3	6	4	2	3	4	1	2	4	2	1	2	33	33	25.6	24.893	215	215;211;209	0	12.345	1.9649	1.0869	36.397	30	5	Leave out requantified	2.6171	2.7846	3.0983	2.3339
406	sp|Q03013|GSTM4_HUMAN;sp|P09488|GSTM1_HUMAN	sp|Q03013|GSTM4_HUMAN;sp|P09488|GSTM1_HUMAN	2;2	2;2	0;0	sp|Q03013|GSTM4_HUMAN Glutathione S-transferase Mu 4 OS=Homo sapiens OX=9606 GN=GSTM4 PE=1 SV=3;sp|P09488|GSTM1_HUMAN Glutathione S-transferase Mu 1 OS=Homo sapiens OX=9606 GN=GSTM1 PE=1 SV=3	2	2	2	0	2	2	2	2	2	2	2	2	2	2	2	2	2	2	0	0	0	0	0	0	0	13.8	13.8	0	25.561	218	218;218	0	15.506	3.1165	1.267	22.793	13	6	Leave out requantified	3.6639	1.3595	1.2255	1.9398
407	sp|P09525|ANXA4_HUMAN	sp|P09525|ANXA4_HUMAN	10	10	10	sp|P09525|ANXA4_HUMAN Annexin A4 OS=Homo sapiens OX=9606 GN=ANXA4 PE=1 SV=4	1	10	10	10	7	5	6	7	7	6	8	7	5	6	7	7	6	8	7	5	6	7	7	6	8	40.1	40.1	40.1	35.882	319	319	0	75.414	1.8102	0.74601	26.462	47	17	Leave out requantified	2.076	2.1032	2.045	1.832
408	sp|P09622|DLDH_HUMAN	sp|P09622|DLDH_HUMAN	14	14	14	sp|P09622|DLDH_HUMAN Dihydrolipoyl dehydrogenase, mitochondrial OS=Homo sapiens OX=9606 GN=DLD PE=1 SV=2	1	14	14	14	10	13	12	12	11	11	14	10	13	12	12	11	11	14	10	13	12	12	11	11	14	39.3	39.3	39.3	54.177	509	509	0	75.297	1.9274	0.85988	29.054	89	35	Leave out requantified	1.9759	1.9913	2.3074	2.2214
409	sp|P09651|ROA1_HUMAN;sp|Q32P51|RA1L2_HUMAN	sp|P09651|ROA1_HUMAN;sp|Q32P51|RA1L2_HUMAN	26;17	25;16	24;15	sp|P09651|ROA1_HUMAN Heterogeneous nuclear ribonucleoprotein A1 OS=Homo sapiens OX=9606 GN=HNRNPA1 PE=1 SV=5;sp|Q32P51|RA1L2_HUMAN Heterogeneous nuclear ribonucleoprotein A1-like 2 OS=Homo sapiens OX=9606 GN=HNRNPA1L2 PE=2 SV=2	2	26	25	24	21	22	22	22	20	20	21	20	21	21	21	19	19	20	20	20	20	21	19	19	19	53.8	53.8	51.9	38.746	372	372;320	0	323.31	4.6056	2.1183	24.928	237	47	Leave out requantified	4.2988	4.523	5.4275	4.8519
410	sp|P09661|RU2A_HUMAN	sp|P09661|RU2A_HUMAN	3	3	3	sp|P09661|RU2A_HUMAN U2 small nuclear ribonucleoprotein A OS=Homo sapiens OX=9606 GN=SNRPA1 PE=1 SV=2	1	3	3	3	1	1	1	1	0	1	1	1	1	1	1	0	1	1	1	1	1	1	0	1	1	12.9	12.9	12.9	28.415	255	255	0	26.891	1.5449	0.59371	30.347	7	5	Median	1.2288	1.9396	1.4011
414	sp|P09960|LKHA4_HUMAN	sp|P09960|LKHA4_HUMAN	18	18	18	sp|P09960|LKHA4_HUMAN Leukotriene A-4 hydrolase OS=Homo sapiens OX=9606 GN=LTA4H PE=1 SV=2	1	18	18	18	11	13	13	8	13	7	10	11	13	13	8	13	7	10	11	13	13	8	13	7	10	43.2	43.2	43.2	69.284	611	611	0	110.41	1.9802	0.83875	30.451	77	31	Leave out requantified	2.2894	2.7196	2.1997	2.2385
415	sp|P09972|ALDOC_HUMAN	sp|P09972|ALDOC_HUMAN	9	2	2	sp|P09972|ALDOC_HUMAN Fructose-bisphosphate aldolase C OS=Homo sapiens OX=9606 GN=ALDOC PE=1 SV=2	1	9	2	2	7	9	6	6	7	5	6	2	2	2	2	2	2	2	2	2	2	2	2	2	2	20.9	7.1	7.1	39.455	364	364	0	49.04	2.74	1.1965	13.43	19	7	Leave out requantified	2.6905	2.907	2.9867	2.8713
416	sp|Q71UI9|H2AV_HUMAN;sp|P0C0S5|H2AZ_HUMAN	sp|Q71UI9|H2AV_HUMAN;sp|P0C0S5|H2AZ_HUMAN	5;5	3;3	3;3	sp|Q71UI9|H2AV_HUMAN Histone H2A.V OS=Homo sapiens OX=9606 GN=H2AZ2 PE=1 SV=3;sp|P0C0S5|H2AZ_HUMAN Histone H2A.Z OS=Homo sapiens OX=9606 GN=H2AZ1 PE=1 SV=2	2	5	3	3	3	3	1	4	3	2	3	2	1	0	3	1	1	2	2	1	0	3	1	1	2	31.2	24.2	24.2	13.509	128	128;128	0	3.3513	3.0588	1.2616	33.811	12	3	Leave out requantified	3.0452	4.0121		3.5688
417	sp|Q99878|H2A1J_HUMAN;sp|Q96KK5|H2A1H_HUMAN;sp|Q9BTM1|H2AJ_HUMAN;sp|Q93077|H2A1C_HUMAN;sp|P0C0S8|H2A1_HUMAN;sp|Q16777|H2A2C_HUMAN;sp|Q7L7L0|H2A3_HUMAN;sp|P20671|H2A1D_HUMAN;sp|P04908|H2A1B_HUMAN;sp|Q6FI13|H2A2A_HUMAN;REV__sp|Q8NB25|F184A_HUMAN	sp|Q99878|H2A1J_HUMAN;sp|Q96KK5|H2A1H_HUMAN;sp|Q9BTM1|H2AJ_HUMAN;sp|Q93077|H2A1C_HUMAN;sp|P0C0S8|H2A1_HUMAN;sp|Q16777|H2A2C_HUMAN;sp|Q7L7L0|H2A3_HUMAN;sp|P20671|H2A1D_HUMAN;sp|P04908|H2A1B_HUMAN;sp|Q6FI13|H2A2A_HUMAN	6;6;6;6;6;5;5;5;5;5;1	6;6;6;6;6;5;5;5;5;5;1	1;1;1;1;1;1;1;1;1;1;0	sp|Q99878|H2A1J_HUMAN Histone H2A type 1-J OS=Homo sapiens OX=9606 GN=H2AC14 PE=1 SV=3;sp|Q96KK5|H2A1H_HUMAN Histone H2A type 1-H OS=Homo sapiens OX=9606 GN=H2AC12 PE=1 SV=3;sp|Q9BTM1|H2AJ_HUMAN Histone H2A.J OS=Homo sapiens OX=9606 GN=H2AJ PE=1 SV=1;sp|Q9	11	6	6	1	3	5	2	3	3	2	4	3	5	2	3	3	2	4	1	1	1	1	1	1	1	60.9	60.9	14.8	13.936	128	128;128;129;130;130;129;130;130;130;130;1140	0	40.715	1.9831	0.787	33.709	30	14	Leave out requantified	2.0322	1.9831	2.2701	1.8091
421	sp|P0DMV9|HS71B_HUMAN;sp|P0DMV8|HS71A_HUMAN	sp|P0DMV9|HS71B_HUMAN;sp|P0DMV8|HS71A_HUMAN	34;34	28;28	16;16	sp|P0DMV9|HS71B_HUMAN Heat shock 70 kDa protein 1B OS=Homo sapiens OX=9606 GN=HSPA1B PE=1 SV=1;sp|P0DMV8|HS71A_HUMAN Heat shock 70 kDa protein 1A OS=Homo sapiens OX=9606 GN=HSPA1A PE=1 SV=1	2	34	28	16	24	23	24	23	23	24	27	19	18	20	18	18	20	21	10	8	11	9	9	10	11	61.8	55.1	31.2	70.051	641	641;641	0	192.44	2.1639	0.92378	40.212	163	35	Leave out requantified	2.4676	2.3943	2.5736	2.3301
422	sp|Q01081|U2AF1_HUMAN;sp|P0DN76|U2AF5_HUMAN	sp|Q01081|U2AF1_HUMAN;sp|P0DN76|U2AF5_HUMAN	3;3	3;3	3;3	sp|Q01081|U2AF1_HUMAN Splicing factor U2AF 35 kDa subunit OS=Homo sapiens OX=9606 GN=U2AF1 PE=1 SV=3;sp|P0DN76|U2AF5_HUMAN Splicing factor U2AF 35 kDa subunit-like protein OS=Homo sapiens OX=9606 GN=U2AF1L5 PE=1 SV=1	2	3	3	3	0	2	2	2	0	3	2	0	2	2	2	0	3	2	0	2	2	2	0	3	2	22.9	22.9	22.9	27.872	240	240;240	0	9.5375	3.4048	1.676	40.131	7	7	Median		4.0436	3.6862	5.6682
423	sp|P0DP25|CALM3_HUMAN;sp|P0DP24|CALM2_HUMAN;sp|P0DP23|CALM1_HUMAN	sp|P0DP25|CALM3_HUMAN;sp|P0DP24|CALM2_HUMAN;sp|P0DP23|CALM1_HUMAN	4;4;4	4;4;4	4;4;4	sp|P0DP25|CALM3_HUMAN Calmodulin-3 OS=Homo sapiens OX=9606 GN=CALM3 PE=1 SV=1;sp|P0DP24|CALM2_HUMAN Calmodulin-2 OS=Homo sapiens OX=9606 GN=CALM2 PE=1 SV=1;sp|P0DP23|CALM1_HUMAN Calmodulin-1 OS=Homo sapiens OX=9606 GN=CALM1 PE=1 SV=1	3	4	4	4	0	0	2	1	3	3	0	0	0	2	1	3	3	0	0	0	2	1	3	3	0	36.9	36.9	36.9	16.837	149	149;149;149	0	19.063	1.7852	0.98366	19.635	8	6	Median			1.8881	1.7062
424	sp|P10155|RO60_HUMAN	sp|P10155|RO60_HUMAN	6	6	6	sp|P10155|RO60_HUMAN 60 kDa SS-A/Ro ribonucleoprotein OS=Homo sapiens OX=9606 GN=RO60 PE=1 SV=2	1	6	6	6	2	3	4	2	1	3	2	2	3	4	2	1	3	2	2	3	4	2	1	3	2	14.1	14.1	14.1	60.67	538	538	0	14.686	2.3822	1.0755	35.204	17	2	Leave out requantified	2.3651	2.4536	3.3304	2.3159
425	sp|P10301|RRAS_HUMAN	sp|P10301|RRAS_HUMAN	5	5	3	sp|P10301|RRAS_HUMAN Ras-related protein R-Ras OS=Homo sapiens OX=9606 GN=RRAS PE=1 SV=1	1	5	5	3	2	2	2	2	3	3	2	2	2	2	2	3	3	2	1	1	0	1	1	1	0	30.3	30.3	17.9	23.48	218	218	0	11.345	7.9983	1.2571	85.69	14	6	Linear	1.3883	2.4663	2.3378	3.3294
426	sp|P10321|HLAC_HUMAN	sp|P10321|HLAC_HUMAN	7	4	3	sp|P10321|HLAC_HUMAN HLA class I histocompatibility antigen, C alpha chain OS=Homo sapiens OX=9606 GN=HLA-C PE=1 SV=3	1	7	4	3	4	5	5	4	6	5	6	2	2	2	2	4	3	4	2	2	2	2	3	2	3	23.5	13.7	11.2	40.648	366	366	0	19.941	1.8372	0.762	9.5355	21	7	Leave out requantified	1.9129	1.8809	2.1419	1.746
427	sp|P10515|ODP2_HUMAN	sp|P10515|ODP2_HUMAN	15	15	15	sp|P10515|ODP2_HUMAN Dihydrolipoyllysine-residue acetyltransferase component of pyruvate dehydrogenase complex, mitochondrial OS=Homo sapiens OX=9606 GN=DLAT PE=1 SV=3	1	15	15	15	8	9	7	10	10	9	9	8	9	7	10	10	9	9	8	9	7	10	10	9	9	36.2	36.2	36.2	68.996	647	647	0	93.507	1.0829	0.45811	31.649	72	11	Leave out requantified	1.4537	1.2414	1.3078	1.0383
428	sp|P10523|ARRS_HUMAN	sp|P10523|ARRS_HUMAN	1	1	1	sp|P10523|ARRS_HUMAN S-arrestin OS=Homo sapiens OX=9606 GN=SAG PE=1 SV=3	1	1	1	1	0	0	1	1	1	1	0	0	0	1	1	1	1	0	0	0	1	1	1	1	0	1.7	1.7	1.7	45.119	405	405	0.0056243	1.2952	3.3738	1.2572	5.286	3	2	Plateau			3.3525	2.8389
429	sp|P10599|THIO_HUMAN	sp|P10599|THIO_HUMAN	9	9	9	sp|P10599|THIO_HUMAN Thioredoxin OS=Homo sapiens OX=9606 GN=TXN PE=1 SV=3	1	9	9	9	6	4	5	7	5	5	7	6	4	5	7	5	5	7	6	4	5	7	5	5	7	65.7	65.7	65.7	11.737	105	105	0	43.505	2.5429	1.065	14.592	34	7	Leave out requantified	2.4609	2.349	2.7205	2.3197
430	sp|P10619|PPGB_HUMAN	sp|P10619|PPGB_HUMAN	5	5	5	sp|P10619|PPGB_HUMAN Lysosomal protective protein OS=Homo sapiens OX=9606 GN=CTSA PE=1 SV=2	1	5	5	5	5	4	3	4	4	2	3	5	4	3	4	4	2	3	5	4	3	4	4	2	3	13.1	13.1	13.1	54.465	480	480	0	33.627	2.0626	0.92858	13.761	25	4	Leave out requantified	2.0485	2.2612	2.4055	1.9242
431	sp|P10620|MGST1_HUMAN	sp|P10620|MGST1_HUMAN	2	2	2	sp|P10620|MGST1_HUMAN Microsomal glutathione S-transferase 1 OS=Homo sapiens OX=9606 GN=MGST1 PE=1 SV=1	1	2	2	2	1	2	1	1	1	1	2	1	2	1	1	1	1	2	1	2	1	1	1	1	2	18.1	18.1	18.1	17.598	155	155	0	10.83	2.0194	0.74681	6.0461	9	2	Leave out requantified	2.4142	2.0065	1.6288	2.4713
432	sp|P10644|KAP0_HUMAN	sp|P10644|KAP0_HUMAN	10	10	10	sp|P10644|KAP0_HUMAN cAMP-dependent protein kinase type I-alpha regulatory subunit OS=Homo sapiens OX=9606 GN=PRKAR1A PE=1 SV=1	1	10	10	10	4	4	5	3	2	3	5	4	4	5	3	2	3	5	4	4	5	3	2	3	5	31.5	31.5	31.5	42.981	381	381	0	37.626	3.099	1.5638	20.953	23	13	Leave out requantified	3.4643	2.8518	2.2413	2.2118
433	sp|P10767|FGF6_HUMAN	sp|P10767|FGF6_HUMAN	1	1	1	sp|P10767|FGF6_HUMAN Fibroblast growth factor 6 OS=Homo sapiens OX=9606 GN=FGF6 PE=1 SV=4	1	1	1	1	1	0	1	0	0	1	1	1	0	1	0	0	1	1	1	0	1	0	0	1	1	5.3	5.3	5.3	22.904	208	208	0.0056054	1.2725	1.9816	1.1825	21.865	4	0	Median	1.9765		2.6601
434	sp|P10768|ESTD_HUMAN	sp|P10768|ESTD_HUMAN	2	2	2	sp|P10768|ESTD_HUMAN S-formylglutathione hydrolase OS=Homo sapiens OX=9606 GN=ESD PE=1 SV=2	1	2	2	2	1	1	1	2	1	1	1	1	1	1	2	1	1	1	1	1	1	2	1	1	1	11.7	11.7	11.7	31.462	282	282	0	3.7146	2.7745	1.0509	49.306	7	6	Median	1.1772	6.1046	3.1854	2.7745
435	sp|P10809|CH60_HUMAN	sp|P10809|CH60_HUMAN	44	44	44	sp|P10809|CH60_HUMAN 60 kDa heat shock protein, mitochondrial OS=Homo sapiens OX=9606 GN=HSPD1 PE=1 SV=2	1	44	44	44	38	33	35	39	35	37	35	38	33	35	39	35	37	35	38	33	35	39	35	37	35	73.8	73.8	73.8	61.054	573	573	0	323.31	2.5794	1.2225	40.528	380	69	Leave out requantified	2.7164	2.582	2.8729	2.703
436	sp|P11021|BIP_HUMAN	sp|P11021|BIP_HUMAN	48	46	46	sp|P11021|BIP_HUMAN Endoplasmic reticulum chaperone BiP OS=Homo sapiens OX=9606 GN=HSPA5 PE=1 SV=2	1	48	46	46	41	43	41	41	43	40	39	39	41	40	39	41	38	37	39	41	40	39	41	38	37	63.8	62.7	62.7	72.332	654	654	0	323.31	1.6131	0.7529	32.228	399	51	Leave out requantified	1.6207	1.5907	1.6962	1.65
437	sp|P11117|PPAL_HUMAN	sp|P11117|PPAL_HUMAN	2	2	2	sp|P11117|PPAL_HUMAN Lysosomal acid phosphatase OS=Homo sapiens OX=9606 GN=ACP2 PE=1 SV=3	1	2	2	2	0	2	2	0	2	2	1	0	2	2	0	2	2	1	0	2	2	0	2	2	1	5.2	5.2	5.2	48.344	423	423	0	7.8793	0.68417	0.29767	54.476	9	8	Median		0.74424	0.62884
438	sp|P11142|HSP7C_HUMAN;sp|P54652|HSP72_HUMAN	sp|P11142|HSP7C_HUMAN	48;16	48;16	38;7	sp|P11142|HSP7C_HUMAN Heat shock cognate 71 kDa protein OS=Homo sapiens OX=9606 GN=HSPA8 PE=1 SV=1	2	48	48	38	43	42	42	42	39	40	43	43	42	42	42	39	40	43	34	33	34	33	31	33	34	64.6	64.6	55.9	70.897	646	646;639	0	323.31	1.9878	1.003	56.389	480	39	Leave out requantified	2.0391	2.0055	2.0796	2.0901
439	sp|P11166|GTR1_HUMAN	sp|P11166|GTR1_HUMAN	7	7	7	sp|P11166|GTR1_HUMAN Solute carrier family 2, facilitated glucose transporter member 1 OS=Homo sapiens OX=9606 GN=SLC2A1 PE=1 SV=2	1	7	7	7	6	5	6	6	6	6	6	6	5	6	6	6	6	6	6	5	6	6	6	6	6	14.4	14.4	14.4	54.083	492	492	0	45.887	2.8772	1.1448	43.834	53	6	Leave out requantified	2.8463	2.7043	3.3092	2.9624
441	sp|P11177|ODPB_HUMAN	sp|P11177|ODPB_HUMAN	11	11	11	sp|P11177|ODPB_HUMAN Pyruvate dehydrogenase E1 component subunit beta, mitochondrial OS=Homo sapiens OX=9606 GN=PDHB PE=1 SV=3	1	11	11	11	5	7	7	6	7	6	6	5	7	7	6	7	6	6	5	7	7	6	7	6	6	40.9	40.9	40.9	39.233	359	359	0	37.018	2.9777	1.2381	29.784	44	17	Leave out requantified	3.0366	3.2849	3.4789	3.3507
442	sp|P11216|PYGB_HUMAN	sp|P11216|PYGB_HUMAN	48	48	37	sp|P11216|PYGB_HUMAN Glycogen phosphorylase, brain form OS=Homo sapiens OX=9606 GN=PYGB PE=1 SV=5	1	48	48	37	28	32	28	30	29	29	34	28	32	28	30	29	29	34	22	24	21	25	23	24	27	59.5	59.5	47.1	96.695	843	843	0	246.29	2.565	1.1508	38.532	220	91	Leave out requantified	2.6719	3.2193	3.1902	2.6544
443	sp|P11217|PYGM_HUMAN	sp|P11217|PYGM_HUMAN	14	2	2	sp|P11217|PYGM_HUMAN Glycogen phosphorylase, muscle form OS=Homo sapiens OX=9606 GN=PYGM PE=1 SV=6	1	14	2	2	8	9	8	5	8	5	7	2	1	1	0	1	0	0	2	1	1	0	1	0	0	18.4	3.3	3.3	97.091	842	842	0	2.5879	3.447	1.2126	59.132	5	3	Median	2.267	3.447	3.6503
444	sp|P11234|RALB_HUMAN;sp|P11233|RALA_HUMAN	sp|P11234|RALB_HUMAN;sp|P11233|RALA_HUMAN	3;3	3;3	3;3	sp|P11234|RALB_HUMAN Ras-related protein Ral-B OS=Homo sapiens OX=9606 GN=RALB PE=1 SV=1;sp|P11233|RALA_HUMAN Ras-related protein Ral-A OS=Homo sapiens OX=9606 GN=RALA PE=1 SV=1	2	3	3	3	2	2	2	2	1	1	1	2	2	2	2	1	1	1	2	2	2	2	1	1	1	11.2	11.2	11.2	23.408	206	206;206	0	3.3234	3.0475	1.2464	6.5032	11	1	Leave out requantified	2.8009	3.125	3.7812	3.3978
445	sp|P11279|LAMP1_HUMAN	sp|P11279|LAMP1_HUMAN	5	5	5	sp|P11279|LAMP1_HUMAN Lysosome-associated membrane glycoprotein 1 OS=Homo sapiens OX=9606 GN=LAMP1 PE=1 SV=3	1	5	5	5	4	4	3	1	5	3	4	4	4	3	1	5	3	4	4	4	3	1	5	3	4	12	12	12	44.882	417	417	0	20.14	1.5493	0.62193	39.948	16	1	Leave out requantified	1.6204	1.5493	1.2598
447	sp|P11413|G6PD_HUMAN	sp|P11413|G6PD_HUMAN	35	35	35	sp|P11413|G6PD_HUMAN Glucose-6-phosphate 1-dehydrogenase OS=Homo sapiens OX=9606 GN=G6PD PE=1 SV=4	1	35	35	35	23	19	22	25	25	20	18	23	19	22	25	25	20	18	23	19	22	25	25	20	18	82.9	82.9	82.9	59.256	515	515	0	172.17	3.8134	1.5204	21.339	177	53	Leave out requantified	3.6803	3.5048	4.212	3.6966
448	sp|P11498|PYC_HUMAN	sp|P11498|PYC_HUMAN	18	18	18	sp|P11498|PYC_HUMAN Pyruvate carboxylase, mitochondrial OS=Homo sapiens OX=9606 GN=PC PE=1 SV=2	1	18	18	18	7	9	9	10	9	8	6	7	9	9	10	9	8	6	7	9	9	10	9	8	6	24.6	24.6	24.6	129.63	1178	1178	0	76.068	3.8266	1.6326	36.163	48	41	Leave out requantified	2.837	1.6453	2.0528	1.0021
449	sp|P11586|C1TC_HUMAN	sp|P11586|C1TC_HUMAN	21	21	21	sp|P11586|C1TC_HUMAN C-1-tetrahydrofolate synthase, cytoplasmic OS=Homo sapiens OX=9606 GN=MTHFD1 PE=1 SV=4	1	21	21	21	12	11	13	13	12	11	11	12	11	13	13	12	11	11	12	11	13	13	12	11	11	27.4	27.4	27.4	101.53	935	935	0	58.551	4.5489	1.9812	31.098	83	62	Leave out requantified	5.881	5.432	2.0648	2.8689
450	sp|P11717|MPRI_HUMAN	sp|P11717|MPRI_HUMAN	4	4	4	sp|P11717|MPRI_HUMAN Cation-independent mannose-6-phosphate receptor OS=Homo sapiens OX=9606 GN=IGF2R PE=1 SV=3	1	4	4	4	1	2	2	0	1	2	1	1	2	2	0	1	2	1	1	2	2	0	1	2	1	2.1	2.1	2.1	274.37	2491	2491	0	1.9876	0.16188	0.071255	115.65	9	9	Median	0.10929	0.32925	0.13675
451	sp|P11766|ADHX_HUMAN	sp|P11766|ADHX_HUMAN	11	11	11	sp|P11766|ADHX_HUMAN Alcohol dehydrogenase class-3 OS=Homo sapiens OX=9606 GN=ADH5 PE=1 SV=4	1	11	11	11	5	9	4	3	7	9	4	5	9	4	3	7	9	4	5	9	4	3	7	9	4	34	34	34	39.724	374	374	0	35.425	2.4775	1.0868	37.14	45	21	Leave out requantified	2.6795	2.4563	1.975	2.4742
452	sp|P11908|PRPS2_HUMAN	sp|P11908|PRPS2_HUMAN	6	2	2	sp|P11908|PRPS2_HUMAN Ribose-phosphate pyrophosphokinase 2 OS=Homo sapiens OX=9606 GN=PRPS2 PE=1 SV=2	1	6	2	2	4	4	5	5	4	4	4	2	2	2	2	2	2	2	2	2	2	2	2	2	2	23	7.9	7.9	34.769	318	318	0	16.232	2.648	1.6104	33.187	13	6	Linear	2.9028	2.8704	2.1168	2.3117
453	sp|P11940|PABP1_HUMAN;sp|Q9H361|PABP3_HUMAN;sp|Q4VXU2|PAP1L_HUMAN;sp|Q5JQF8|PAP1M_HUMAN	sp|P11940|PABP1_HUMAN;sp|Q9H361|PABP3_HUMAN	29;17;6;1	29;17;6;1	19;14;3;1	sp|P11940|PABP1_HUMAN Polyadenylate-binding protein 1 OS=Homo sapiens OX=9606 GN=PABPC1 PE=1 SV=2;sp|Q9H361|PABP3_HUMAN Polyadenylate-binding protein 3 OS=Homo sapiens OX=9606 GN=PABPC3 PE=1 SV=2	4	29	29	19	18	18	15	19	18	19	19	18	18	15	19	18	19	19	11	11	10	13	13	12	12	47.8	47.8	29.1	70.67	636	636;631;614;200	0	139.42	3.3027	1.3786	23.733	137	53	Leave out requantified	3.6722	3.2799	4.1419	3.4645
454	sp|P12004|PCNA_HUMAN	sp|P12004|PCNA_HUMAN	14	14	14	sp|P12004|PCNA_HUMAN Proliferating cell nuclear antigen OS=Homo sapiens OX=9606 GN=PCNA PE=1 SV=1	1	14	14	14	13	14	13	14	14	14	14	13	14	13	14	14	14	14	13	14	13	14	14	14	14	72.8	72.8	72.8	28.768	261	261	0	206.65	2.2738	0.91253	19.782	136	20	Leave out requantified	2.3349	2.2365	2.333	2.3695
455	sp|P12081|HARS1_HUMAN;sp|P49590|SYHM_HUMAN	sp|P12081|HARS1_HUMAN	14;1	14;1	14;1	sp|P12081|HARS1_HUMAN Histidine--tRNA ligase, cytoplasmic OS=Homo sapiens OX=9606 GN=HARS1 PE=1 SV=2	2	14	14	14	4	6	7	7	4	7	5	4	6	7	7	4	7	5	4	6	7	7	4	7	5	30.1	30.1	30.1	57.41	509	509;506	0	34.029	1.722	0.89351	40.672	39	24	Leave out requantified	1.4222	2.6109	2.136	1.5553
456	sp|P12236|ADT3_HUMAN;sp|P12235|ADT1_HUMAN;sp|Q9H0C2|ADT4_HUMAN	sp|P12236|ADT3_HUMAN;sp|P12235|ADT1_HUMAN	18;12;3	18;12;3	9;4;0	sp|P12236|ADT3_HUMAN ADP/ATP translocase 3 OS=Homo sapiens OX=9606 GN=SLC25A6 PE=1 SV=4;sp|P12235|ADT1_HUMAN ADP/ATP translocase 1 OS=Homo sapiens OX=9606 GN=SLC25A4 PE=1 SV=4	3	18	18	9	12	16	13	16	14	12	13	12	16	13	16	14	12	13	5	8	6	7	8	5	6	61.4	61.4	35.9	32.866	298	298;298;315	0	87.178	4.5346	1.8179	18.982	120	29	Leave out requantified	4.8145	4.3963	5.1724	4.581
457	sp|P12268|IMDH2_HUMAN;sp|P20839|IMDH1_HUMAN	sp|P12268|IMDH2_HUMAN	19;2	19;2	19;2	sp|P12268|IMDH2_HUMAN Inosine-5-monophosphate dehydrogenase 2 OS=Homo sapiens OX=9606 GN=IMPDH2 PE=1 SV=2	2	19	19	19	14	14	13	11	15	13	13	14	14	13	11	15	13	13	14	14	13	11	15	13	13	46.5	46.5	46.5	55.804	514	514;514	0	114.65	4.9484	2.2818	20.338	97	44	Leave out requantified	4.6879	5.4277	5.0907	5.2826
458	sp|P12270|TPR_HUMAN	sp|P12270|TPR_HUMAN	26	26	26	sp|P12270|TPR_HUMAN Nucleoprotein TPR OS=Homo sapiens OX=9606 GN=TPR PE=1 SV=3	1	26	26	26	14	16	16	14	14	17	19	14	16	16	14	14	17	19	14	16	16	14	14	17	19	15	15	15	267.29	2363	2363	0	130.28	1.8828	0.9045	39.765	107	41	Leave out requantified	1.9797	1.7273	2.326	1.8641
459	sp|P12429|ANXA3_HUMAN	sp|P12429|ANXA3_HUMAN	18	18	18	sp|P12429|ANXA3_HUMAN Annexin A3 OS=Homo sapiens OX=9606 GN=ANXA3 PE=1 SV=3	1	18	18	18	13	13	11	12	10	14	10	13	13	11	12	10	14	10	13	13	11	12	10	14	10	61.9	61.9	61.9	36.375	323	323	0	88.15	2.796	1.1502	24.684	89	9	Leave out requantified	2.8439	2.9096	3.0762	3.0794
460	sp|P12814|ACTN1_HUMAN;sp|P35609|ACTN2_HUMAN;sp|Q08043|ACTN3_HUMAN	sp|P12814|ACTN1_HUMAN	63;15;10	43;3;1	43;3;1	sp|P12814|ACTN1_HUMAN Alpha-actinin-1 OS=Homo sapiens OX=9606 GN=ACTN1 PE=1 SV=2	3	63	43	43	55	54	53	51	52	55	53	38	37	34	35	35	35	36	38	37	34	35	35	35	36	73	53.9	53.9	103.06	892	892;894;901	0	323.31	1.8162	0.83078	34.631	387	63	Leave out requantified	1.8656	1.7999	1.9647	1.8625
461	sp|P12955|PEPD_HUMAN	sp|P12955|PEPD_HUMAN	8	8	8	sp|P12955|PEPD_HUMAN Xaa-Pro dipeptidase OS=Homo sapiens OX=9606 GN=PEPD PE=1 SV=3	1	8	8	8	3	4	4	1	1	4	1	3	4	4	1	1	4	1	3	4	4	1	1	4	1	24.7	24.7	24.7	54.548	493	493	0	12.586	2.171	1.0304	17.147	14	1	Leave out requantified	2.4285	2.4714	2.171	2.0927
462	sp|P12956|XRCC6_HUMAN	sp|P12956|XRCC6_HUMAN	27	27	27	sp|P12956|XRCC6_HUMAN X-ray repair cross-complementing protein 6 OS=Homo sapiens OX=9606 GN=XRCC6 PE=1 SV=2	1	27	27	27	17	18	17	18	20	18	21	17	18	17	18	20	18	21	17	18	17	18	20	18	21	50.4	50.4	50.4	69.842	609	609	0	143.56	2.1077	0.99479	26.378	144	27	Leave out requantified	2.3343	2.151	2.5596	2.1697
463	sp|P13010|XRCC5_HUMAN	sp|P13010|XRCC5_HUMAN	29	29	29	sp|P13010|XRCC5_HUMAN X-ray repair cross-complementing protein 5 OS=Homo sapiens OX=9606 GN=XRCC5 PE=1 SV=3	1	29	29	29	18	18	18	20	20	19	20	18	18	18	20	20	19	20	18	18	18	20	20	19	20	51.4	51.4	51.4	82.704	732	732	0	187.68	2.113	0.9919	44.007	154	41	Leave out requantified	2.3566	1.9477	2.2188	2.3873
464	sp|P13164|IFM1_HUMAN;sp|Q01629|IFM2_HUMAN;sp|Q01628|IFM3_HUMAN	sp|P13164|IFM1_HUMAN;sp|Q01629|IFM2_HUMAN;sp|Q01628|IFM3_HUMAN	1;1;1	1;1;1	1;1;1	sp|P13164|IFM1_HUMAN Interferon-induced transmembrane protein 1 OS=Homo sapiens OX=9606 GN=IFITM1 PE=1 SV=3;sp|Q01629|IFM2_HUMAN Interferon-induced transmembrane protein 2 OS=Homo sapiens OX=9606 GN=IFITM2 PE=1 SV=2;sp|Q01628|IFM3_HUMAN Interferon-induced	3	1	1	1	1	0	0	1	0	1	1	1	0	0	1	0	1	1	1	0	0	1	0	1	1	12.8	12.8	12.8	13.964	125	125;132;133	0	9.9106	1.6859	0.77622	5.2089	4	0	Median	1.7676			1.9395
465	sp|P13473|LAMP2_HUMAN	sp|P13473|LAMP2_HUMAN	4	4	4	sp|P13473|LAMP2_HUMAN Lysosome-associated membrane glycoprotein 2 OS=Homo sapiens OX=9606 GN=LAMP2 PE=1 SV=2	1	4	4	4	3	2	4	3	3	4	3	3	2	4	3	3	4	3	3	2	4	3	3	4	3	8.8	8.8	8.8	44.96	410	410	0	13.862	1.9135	0.7534	13.432	20	0	Leave out requantified	1.9343	1.9038	1.9135	1.851
466	sp|P13489|RINI_HUMAN	sp|P13489|RINI_HUMAN	22	22	22	sp|P13489|RINI_HUMAN Ribonuclease inhibitor OS=Homo sapiens OX=9606 GN=RNH1 PE=1 SV=2	1	22	22	22	16	20	15	17	18	17	13	16	20	15	17	18	17	13	16	20	15	17	18	17	13	65.9	65.9	65.9	49.973	461	461	0	315.88	2.2632	0.90515	25.258	123	15	Leave out requantified	2.2377	2.1594	2.703	2.4658
467	sp|P13639|EF2_HUMAN	sp|P13639|EF2_HUMAN	55	55	54	sp|P13639|EF2_HUMAN Elongation factor 2 OS=Homo sapiens OX=9606 GN=EEF2 PE=1 SV=4	1	55	55	54	42	44	42	42	39	43	44	42	44	42	42	39	43	44	41	43	41	41	38	42	43	65.2	65.2	64	95.337	858	858	0	323.31	2.6221	1.0969	30.77	419	109	Leave out requantified	2.7875	2.7275	2.9526	2.7142
468	sp|P13667|PDIA4_HUMAN	sp|P13667|PDIA4_HUMAN	15	15	15	sp|P13667|PDIA4_HUMAN Protein disulfide-isomerase A4 OS=Homo sapiens OX=9606 GN=PDIA4 PE=1 SV=2	1	15	15	15	7	10	9	7	12	9	10	7	10	9	7	12	9	10	7	10	9	7	12	9	10	27.9	27.9	27.9	72.932	645	645	0	62.078	2.361	1.1635	14.322	64	24	Leave out requantified	2.6283	2.9016	3.15	3.3012
469	sp|P13674|P4HA1_HUMAN	sp|P13674|P4HA1_HUMAN	8	8	8	sp|P13674|P4HA1_HUMAN Prolyl 4-hydroxylase subunit alpha-1 OS=Homo sapiens OX=9606 GN=P4HA1 PE=1 SV=2	1	8	8	8	3	1	1	3	3	0	4	3	1	1	3	3	0	4	3	1	1	3	3	0	4	19.7	19.7	19.7	61.049	534	534	0	12.607	1.713	0.81174	26.69	14	3	Leave out requantified	2.463	1.6274	1.7178	1.5247
470	sp|P13693|TCTP_HUMAN;sp|Q9HAU6|TCTP8_HUMAN;sp|Q56UQ5|TPT1L_HUMAN	sp|P13693|TCTP_HUMAN	11;2;2	11;2;2	11;2;2	sp|P13693|TCTP_HUMAN Translationally-controlled tumor protein OS=Homo sapiens OX=9606 GN=TPT1 PE=1 SV=1	3	11	11	11	8	10	10	8	9	8	8	8	10	10	8	9	8	8	8	10	10	8	9	8	8	50	50	50	19.595	172	172;139;140	0	51.994	2.482	1.2001	31.415	82	21	Leave out requantified	2.5822	2.4502	2.6779	2.4335
472	sp|P13726|TF_HUMAN	sp|P13726|TF_HUMAN	5	5	5	sp|P13726|TF_HUMAN Tissue factor OS=Homo sapiens OX=9606 GN=F3 PE=1 SV=1	1	5	5	5	3	4	5	5	4	5	5	3	4	5	5	4	5	5	3	4	5	5	4	5	5	30.8	30.8	30.8	33.067	295	295	0	39.879	1.4306	0.65391	5.4543	31	3	Leave out requantified	1.5784	1.5208	1.4204	1.4939
473	sp|P13797|PLST_HUMAN;sp|P13796|PLSL_HUMAN	sp|P13797|PLST_HUMAN	32;7	32;7	30;6	sp|P13797|PLST_HUMAN Plastin-3 OS=Homo sapiens OX=9606 GN=PLS3 PE=1 SV=4	2	32	32	30	22	24	22	25	24	26	23	22	24	22	25	24	26	23	20	22	21	23	22	24	21	59.5	59.5	55.9	70.81	630	630;627	0	200.99	1.7561	0.76325	25.53	165	40	Leave out requantified	1.8964	1.7921	2.1389	2.0667
474	sp|P13798|ACPH_HUMAN	sp|P13798|ACPH_HUMAN	4	4	4	sp|P13798|ACPH_HUMAN Acylamino-acid-releasing enzyme OS=Homo sapiens OX=9606 GN=APEH PE=1 SV=4	1	4	4	4	2	1	1	1	2	1	2	2	1	1	1	2	1	2	2	1	1	1	2	1	2	9.7	9.7	9.7	81.224	732	732	0	5.7036	0.84966	0.3653	88.877	10	8	Median	0.85169	0.43467	2.2992	0.35357
475	sp|P13804|ETFA_HUMAN	sp|P13804|ETFA_HUMAN	6	6	6	sp|P13804|ETFA_HUMAN Electron transfer flavoprotein subunit alpha, mitochondrial OS=Homo sapiens OX=9606 GN=ETFA PE=1 SV=1	1	6	6	6	5	5	4	5	6	4	5	5	5	4	5	6	4	5	5	5	4	5	6	4	5	25.2	25.2	25.2	35.079	333	333	0	16.253	2.5477	1.1792	36.894	28	15	Median	4.3186	3.0497	2.179	2.3382
476	sp|P13861|KAP2_HUMAN	sp|P13861|KAP2_HUMAN	15	15	15	sp|P13861|KAP2_HUMAN cAMP-dependent protein kinase type II-alpha regulatory subunit OS=Homo sapiens OX=9606 GN=PRKAR2A PE=1 SV=2	1	15	15	15	9	8	10	6	6	6	7	9	8	10	6	6	6	7	9	8	10	6	6	6	7	41.6	41.6	41.6	45.518	404	404	0	41.754	1.9509	0.82202	48.892	50	11	Leave out requantified	1.8935	2.0547	2.1453	2.209
477	sp|P13987|CD59_HUMAN	sp|P13987|CD59_HUMAN	3	3	3	sp|P13987|CD59_HUMAN CD59 glycoprotein OS=Homo sapiens OX=9606 GN=CD59 PE=1 SV=1	1	3	3	3	2	1	1	2	2	2	2	2	1	1	2	2	2	2	2	1	1	2	2	2	2	25	25	25	14.177	128	128	0	10.353	1.9851	0.86842	6.3	20	2	Leave out requantified	2.2968	2.1244	2.2579	2.3166
478	sp|P14174|MIF_HUMAN	sp|P14174|MIF_HUMAN	2	2	2	sp|P14174|MIF_HUMAN Macrophage migration inhibitory factor OS=Homo sapiens OX=9606 GN=MIF PE=1 SV=4	1	2	2	2	0	1	1	1	1	1	1	0	1	1	1	1	1	1	0	1	1	1	1	1	1	26.1	26.1	26.1	12.476	115	115	0	5.8024	3.9055	1.5222	43.553	5	4	Median		4.2611	3.4213	3.6839
479	sp|P14314|GLU2B_HUMAN	sp|P14314|GLU2B_HUMAN	14	14	14	sp|P14314|GLU2B_HUMAN Glucosidase 2 subunit beta OS=Homo sapiens OX=9606 GN=PRKCSH PE=1 SV=2	1	14	14	14	9	6	9	10	10	11	8	9	6	9	10	10	11	8	9	6	9	10	10	11	8	31.2	31.2	31.2	59.425	528	528	0	71.618	2.8958	1.5073	37.42	74	15	Leave out requantified	2.8793	2.7004	3.4588	3.355
480	sp|P14324|FPPS_HUMAN	sp|P14324|FPPS_HUMAN	9	9	9	sp|P14324|FPPS_HUMAN Farnesyl pyrophosphate synthase OS=Homo sapiens OX=9606 GN=FDPS PE=1 SV=4	1	9	9	9	7	6	9	8	8	6	7	7	6	9	8	8	6	7	7	6	9	8	8	6	7	28.4	28.4	28.4	48.275	419	419	0	43.667	2.8011	1.0675	25.388	59	10	Leave out requantified	2.9499	2.5019	2.8376	2.597
481	sp|P14550|AK1A1_HUMAN	sp|P14550|AK1A1_HUMAN	3	3	3	sp|P14550|AK1A1_HUMAN Aldo-keto reductase family 1 member A1 OS=Homo sapiens OX=9606 GN=AKR1A1 PE=1 SV=3	1	3	3	3	1	3	2	1	1	1	1	1	3	2	1	1	1	1	1	3	2	1	1	1	1	11.1	11.1	11.1	36.573	325	325	0	10.509	2.0366	0.87297	33.303	10	3	Median	2.3656	2.411	2.0331	2.7161
482	sp|P14618|KPYM_HUMAN;sp|P30613|KPYR_HUMAN	sp|P14618|KPYM_HUMAN	59;1	59;1	59;1	sp|P14618|KPYM_HUMAN Pyruvate kinase PKM OS=Homo sapiens OX=9606 GN=PKM PE=1 SV=4	2	59	59	59	50	54	54	53	57	54	56	50	54	54	53	57	54	56	50	54	54	53	57	54	56	86.8	86.8	86.8	57.936	531	531;574	0	323.31	2.9293	1.6348	30.417	716	148	Leave out requantified	3.1893	2.9109	3.3411	3.1132
483	sp|P14625|ENPL_HUMAN;sp|Q58FF3|ENPLL_HUMAN	sp|P14625|ENPL_HUMAN	56;6	54;6	54;6	sp|P14625|ENPL_HUMAN Endoplasmin OS=Homo sapiens OX=9606 GN=HSP90B1 PE=1 SV=1	2	56	54	54	49	47	48	48	48	49	49	47	45	46	46	46	47	47	47	45	46	46	46	47	47	61.8	60	60	92.468	803	803;399	0	323.31	1.6373	0.81036	31.263	486	46	Leave out requantified	1.6878	1.5432	1.7686	1.7126
484	sp|P14678|RSMB_HUMAN;sp|P63162|RSMN_HUMAN	sp|P14678|RSMB_HUMAN;sp|P63162|RSMN_HUMAN	9;8	9;8	9;8	sp|P14678|RSMB_HUMAN Small nuclear ribonucleoprotein-associated proteins B and B OS=Homo sapiens OX=9606 GN=SNRPB PE=1 SV=2;sp|P63162|RSMN_HUMAN Small nuclear ribonucleoprotein-associated protein N OS=Homo sapiens OX=9606 GN=SNRPN PE=1 SV=1	2	9	9	9	7	7	6	7	6	6	5	7	7	6	7	6	6	5	7	7	6	7	6	6	5	33.3	33.3	33.3	24.61	240	240;240	0	19.098	2.5854	1.0931	24.649	44	19	Leave out requantified	2.8273	2.8301	3.6438	2.1683
485	sp|P14735|IDE_HUMAN	sp|P14735|IDE_HUMAN	4	4	4	sp|P14735|IDE_HUMAN Insulin-degrading enzyme OS=Homo sapiens OX=9606 GN=IDE PE=1 SV=4	1	4	4	4	1	2	2	1	1	1	0	1	2	2	1	1	1	0	1	2	2	1	1	1	0	5.9	5.9	5.9	117.97	1019	1019	0	4.3567	1.3789	0.71388	34.011	8	6	Median	1.9181	1.1105	1.6603	2.1028
486	sp|P14866|HNRPL_HUMAN	sp|P14866|HNRPL_HUMAN	19	19	18	sp|P14866|HNRPL_HUMAN Heterogeneous nuclear ribonucleoprotein L OS=Homo sapiens OX=9606 GN=HNRNPL PE=1 SV=2	1	19	19	18	10	10	15	14	14	13	13	10	10	15	14	14	13	13	10	10	14	13	14	12	12	52.6	52.6	51.4	64.132	589	589	0	164.22	4.0966	1.8446	36.374	86	43	Leave out requantified	4.5118	3.9257	5.3473	4.9945
487	sp|P14868|SYDC_HUMAN	sp|P14868|SYDC_HUMAN	17	17	17	sp|P14868|SYDC_HUMAN Aspartate--tRNA ligase, cytoplasmic OS=Homo sapiens OX=9606 GN=DARS1 PE=1 SV=2	1	17	17	17	9	9	8	8	9	8	11	9	9	8	8	9	8	11	9	9	8	8	9	8	11	38.1	38.1	38.1	57.136	501	501	0	45.908	5.4019	2.1313	17.802	58	27	Leave out requantified	5.805	5.4614	6.1561	6.1414
488	sp|P14923|PLAK_HUMAN	sp|P14923|PLAK_HUMAN	4	4	4	sp|P14923|PLAK_HUMAN Junction plakoglobin OS=Homo sapiens OX=9606 GN=JUP PE=1 SV=3	1	4	4	4	4	1	1	3	2	2	1	4	1	1	3	2	2	1	4	1	1	3	2	2	1	6.6	6.6	6.6	81.744	745	745	0	20.197	0.35972	0.1756	36.142	14	3	Leave out requantified	0.21928	0.52155	0.53222	0.15398
489	sp|P15121|ALDR_HUMAN;sp|C9JRZ8|AK1BF_HUMAN	sp|P15121|ALDR_HUMAN	11;1	11;1	11;1	sp|P15121|ALDR_HUMAN Aldo-keto reductase family 1 member B1 OS=Homo sapiens OX=9606 GN=AKR1B1 PE=1 SV=3	2	11	11	11	8	8	9	8	7	9	8	8	8	9	8	7	9	8	8	8	9	8	7	9	8	53.5	53.5	53.5	35.853	316	316;316	0	105.05	2.3144	1.0785	27.527	64	21	Leave out requantified	2.6099	2.4907	3.156	2.6259
490	sp|P15153|RAC2_HUMAN	sp|P15153|RAC2_HUMAN	6	2	2	sp|P15153|RAC2_HUMAN Ras-related C3 botulinum toxin substrate 2 OS=Homo sapiens OX=9606 GN=RAC2 PE=1 SV=1	1	6	2	2	3	5	4	5	5	6	4	1	2	2	2	2	2	1	1	2	2	2	2	2	1	33.3	12	12	21.429	192	192	0	4.3805	3.9156	1.5483	87.525	12	5	Plateau	4.1394	1.7048	1.7433	2.0431
491	sp|P15170|ERF3A_HUMAN	sp|P15170|ERF3A_HUMAN	10	10	5	sp|P15170|ERF3A_HUMAN Eukaryotic peptide chain release factor GTP-binding subunit ERF3A OS=Homo sapiens OX=9606 GN=GSPT1 PE=1 SV=1	1	10	10	5	6	5	5	4	5	5	6	6	5	5	4	5	5	6	3	2	2	1	2	1	2	27.9	27.9	15.8	55.755	499	499	0	24.649	1.8944	0.89594	38.172	36	14	Leave out requantified	2.4267	1.9517	1.4731	1.7505
492	sp|P15311|EZRI_HUMAN	sp|P15311|EZRI_HUMAN	30	21	20	sp|P15311|EZRI_HUMAN Ezrin OS=Homo sapiens OX=9606 GN=EZR PE=1 SV=4	1	30	21	20	18	19	22	20	18	20	20	10	11	13	11	10	12	12	10	11	12	11	10	12	11	54.8	40.8	39.6	69.412	586	586	0	63.005	3.7347	1.6962	24.016	77	25	Leave out requantified	3.7481	3.6515	4.1992	5.2192
493	sp|P15374|UCHL3_HUMAN	sp|P15374|UCHL3_HUMAN	7	7	7	sp|P15374|UCHL3_HUMAN Ubiquitin carboxyl-terminal hydrolase isozyme L3 OS=Homo sapiens OX=9606 GN=UCHL3 PE=1 SV=1	1	7	7	7	3	3	5	3	2	4	2	3	3	5	3	2	4	2	3	3	5	3	2	4	2	43.9	43.9	43.9	26.182	230	230	0	25.932	1.9799	1.0001	27.269	19	7	Leave out requantified	1.4621	1.7488	1.2225	1.6301
494	sp|P15531|NDKA_HUMAN	sp|P15531|NDKA_HUMAN	11	6	6	sp|P15531|NDKA_HUMAN Nucleoside diphosphate kinase A OS=Homo sapiens OX=9606 GN=NME1 PE=1 SV=1	1	11	6	6	9	10	9	9	7	11	9	5	6	4	4	3	6	4	5	6	4	4	3	6	4	70.4	39.5	39.5	17.149	152	152	0	17.703	2.2719	1.0233	51.102	35	8	Leave out requantified	1.8898	1.849	2.3495	2.5036
495	sp|P15880|RS2_HUMAN	sp|P15880|RS2_HUMAN	14	14	14	sp|P15880|RS2_HUMAN 40S ribosomal protein S2 OS=Homo sapiens OX=9606 GN=RPS2 PE=1 SV=2	1	14	14	14	10	11	10	9	11	10	9	10	11	10	9	11	10	9	10	11	10	9	11	10	9	50.9	50.9	50.9	31.324	293	293	0	76.673	5.42	2.3396	15.621	79	36	Leave out requantified	5.4954	5.3811	6.6557	6.0599
496	sp|P15924|DESP_HUMAN	sp|P15924|DESP_HUMAN	10	10	10	sp|P15924|DESP_HUMAN Desmoplakin OS=Homo sapiens OX=9606 GN=DSP PE=1 SV=3	1	10	10	10	7	0	1	7	4	0	0	7	0	1	7	4	0	0	7	0	1	7	4	0	0	4.5	4.5	4.5	331.77	2871	2871	0	25.533	0.40458	0.18288	53.702	16	15	Median	0.46147		0.6009	0.42718
497	sp|P15927|RFA2_HUMAN	sp|P15927|RFA2_HUMAN	3	3	3	sp|P15927|RFA2_HUMAN Replication protein A 32 kDa subunit OS=Homo sapiens OX=9606 GN=RPA2 PE=1 SV=1	1	3	3	3	3	2	2	2	2	2	2	3	2	2	2	2	2	2	3	2	2	2	2	2	2	13.3	13.3	13.3	29.247	270	270	0	26.923	1.319	0.5274	45.093	14	5	Median	1.1819	1.8359	1.3119	1.8104
498	sp|P16070|CD44_HUMAN	sp|P16070|CD44_HUMAN	11	11	11	sp|P16070|CD44_HUMAN CD44 antigen OS=Homo sapiens OX=9606 GN=CD44 PE=1 SV=3	1	11	11	11	10	7	9	9	9	9	8	10	7	9	9	9	9	8	10	7	9	9	9	9	8	14.3	14.3	14.3	81.537	742	742	0	53.507	1.8749	0.79211	19.695	75	7	Leave out requantified	1.8786	1.727	1.9698	2.1085
499	sp|P16144|ITB4_HUMAN	sp|P16144|ITB4_HUMAN	7	7	7	sp|P16144|ITB4_HUMAN Integrin beta-4 OS=Homo sapiens OX=9606 GN=ITGB4 PE=1 SV=5	1	7	7	7	3	3	3	2	3	4	5	3	3	3	2	3	4	5	3	3	3	2	3	4	5	6.3	6.3	6.3	202.16	1822	1822	0	22.407	2.0351	1.093	27.439	22	13	Leave out requantified	1.9578	0.89932	1.9581	0.24384
500	sp|P16152|CBR1_HUMAN	sp|P16152|CBR1_HUMAN	13	13	11	sp|P16152|CBR1_HUMAN Carbonyl reductase [NADPH] 1 OS=Homo sapiens OX=9606 GN=CBR1 PE=1 SV=3	1	13	13	11	12	11	10	10	10	10	11	12	11	10	10	10	10	11	10	9	8	8	8	8	9	62.1	62.1	51.6	30.375	277	277	0	119.19	2.7566	1.1258	23.429	73	13	Leave out requantified	2.9353	2.9419	3.1337	3.1214
501	sp|P16435|NCPR_HUMAN	sp|P16435|NCPR_HUMAN	4	4	4	sp|P16435|NCPR_HUMAN NADPH--cytochrome P450 reductase OS=Homo sapiens OX=9606 GN=POR PE=1 SV=2	1	4	4	4	2	2	2	2	1	2	1	2	2	2	2	1	2	1	2	2	2	2	1	2	1	9.2	9.2	9.2	76.689	677	677	0	7.9413	1.797	0.70066	94.225	12	3	Leave out requantified	1.6404	2.4041	0.93192	3.6933
502	sp|P16615|AT2A2_HUMAN;sp|Q93084|AT2A3_HUMAN;sp|O14983|AT2A1_HUMAN	sp|P16615|AT2A2_HUMAN	20;4;3	20;4;3	20;4;3	sp|P16615|AT2A2_HUMAN Sarcoplasmic/endoplasmic reticulum calcium ATPase 2 OS=Homo sapiens OX=9606 GN=ATP2A2 PE=1 SV=1	3	20	20	20	11	9	8	8	10	10	5	11	9	8	8	10	10	5	11	9	8	8	10	10	5	24.2	24.2	24.2	114.76	1042	1042;999;1001	0	43.695	2.9554	1.4	29.106	53	31	Leave out requantified	3.9937	3.676	5.8501	1.8908
503	sp|P16930|FAAA_HUMAN	sp|P16930|FAAA_HUMAN	3	3	3	sp|P16930|FAAA_HUMAN Fumarylacetoacetase OS=Homo sapiens OX=9606 GN=FAH PE=1 SV=2	1	3	3	3	2	3	2	2	2	2	1	2	3	2	2	2	2	1	2	3	2	2	2	2	1	8.8	8.8	8.8	46.374	419	419	0	11.731	1.9723	0.87612	30.957	13	13	Median	1.454	2.8208	2.0978	1.7635
505	sp|P17066|HSP76_HUMAN;sp|P48741|HSP77_HUMAN	sp|P17066|HSP76_HUMAN;sp|P48741|HSP77_HUMAN	12;7	1;1	1;1	sp|P17066|HSP76_HUMAN Heat shock 70 kDa protein 6 OS=Homo sapiens OX=9606 GN=HSPA6 PE=1 SV=2;sp|P48741|HSP77_HUMAN Putative heat shock 70 kDa protein 7 OS=Homo sapiens OX=9606 GN=HSPA7 PE=5 SV=2	2	12	1	1	10	11	11	10	8	8	9	1	1	1	1	1	1	1	1	1	1	1	1	1	1	16.3	1.7	1.7	71.027	643	643;367	0	9.0616	2.1611	1.3173	44.764	9	1	Median	2.1913	2.1611	1.6701	1.7855
506	sp|P17174|AATC_HUMAN	sp|P17174|AATC_HUMAN	5	5	5	sp|P17174|AATC_HUMAN Aspartate aminotransferase, cytoplasmic OS=Homo sapiens OX=9606 GN=GOT1 PE=1 SV=3	1	5	5	5	2	4	2	0	3	1	3	2	4	2	0	3	1	3	2	4	2	0	3	1	3	24.7	24.7	24.7	46.247	413	413	0	37.364	1.9055	0.86474	57.425	16	9	Leave out requantified	1.2475	2.4347	2.7985
508	sp|P17301|ITA2_HUMAN	sp|P17301|ITA2_HUMAN	25	25	25	sp|P17301|ITA2_HUMAN Integrin alpha-2 OS=Homo sapiens OX=9606 GN=ITGA2 PE=1 SV=1	1	25	25	25	17	17	16	18	17	19	17	17	17	16	18	17	19	17	17	17	16	18	17	19	17	30.6	30.6	30.6	129.29	1181	1181	0	129.24	1.7389	0.68974	25.665	121	33	Leave out requantified	1.8344	1.6571	2.1198	1.9174
509	sp|P17612|KAPCA_HUMAN;sp|P22694|KAPCB_HUMAN	sp|P17612|KAPCA_HUMAN;sp|P22694|KAPCB_HUMAN	5;3	5;3	5;3	sp|P17612|KAPCA_HUMAN cAMP-dependent protein kinase catalytic subunit alpha OS=Homo sapiens OX=9606 GN=PRKACA PE=1 SV=2;sp|P22694|KAPCB_HUMAN cAMP-dependent protein kinase catalytic subunit beta OS=Homo sapiens OX=9606 GN=PRKACB PE=1 SV=2	2	5	5	5	3	3	4	2	2	3	1	3	3	4	2	2	3	1	3	3	4	2	2	3	1	21.1	21.1	21.1	40.589	351	351;351	0	12.308	3.101	1.1644	22.093	18	7	Leave out requantified	2.2827	3.4788	2.431	0.82367
510	sp|P17655|CAN2_HUMAN	sp|P17655|CAN2_HUMAN	32	32	32	sp|P17655|CAN2_HUMAN Calpain-2 catalytic subunit OS=Homo sapiens OX=9606 GN=CAPN2 PE=1 SV=6	1	32	32	32	23	23	20	24	22	24	24	23	23	20	24	22	24	24	23	23	20	24	22	24	24	54.3	54.3	54.3	79.994	700	700	0	323.31	3.1605	1.3878	29.493	188	49	Leave out requantified	3.4651	3.2622	3.6747	3.2835
511	sp|P17812|PYRG1_HUMAN;sp|Q9NRF8|PYRG2_HUMAN	sp|P17812|PYRG1_HUMAN	6;1	6;1	6;1	sp|P17812|PYRG1_HUMAN CTP synthase 1 OS=Homo sapiens OX=9606 GN=CTPS1 PE=1 SV=2	2	6	6	6	3	4	1	2	3	4	5	3	4	1	2	3	4	5	3	4	1	2	3	4	5	14.9	14.9	14.9	66.69	591	591;586	0	31.278	3.018	1.2898	26.061	21	6	Leave out requantified	2.2359	3.6664	4.9435	3.3705
512	sp|P17844|DDX5_HUMAN	sp|P17844|DDX5_HUMAN	16	15	12	sp|P17844|DDX5_HUMAN Probable ATP-dependent RNA helicase DDX5 OS=Homo sapiens OX=9606 GN=DDX5 PE=1 SV=1	1	16	15	12	12	10	11	12	7	12	12	12	9	11	11	6	11	11	9	7	9	9	5	9	9	29.8	28	22.1	69.147	614	614	0	68.334	4.9049	2.3607	77.408	76	46	Leave out requantified	2.8277	2.973	7.7247	4.8893
513	sp|P17858|PFKAL_HUMAN	sp|P17858|PFKAL_HUMAN	7	5	4	sp|P17858|PFKAL_HUMAN ATP-dependent 6-phosphofructokinase, liver type OS=Homo sapiens OX=9606 GN=PFKL PE=1 SV=6	1	7	5	4	5	6	4	4	6	4	5	3	4	2	2	4	2	3	2	3	2	1	3	1	2	12.9	9.4	8.2	85.018	780	780	0	25.934	2.9729	1.1572	42.105	13	8	Median	3.0489	6.586		2.1022
514	sp|P17931|LEG3_HUMAN	sp|P17931|LEG3_HUMAN	6	6	6	sp|P17931|LEG3_HUMAN Galectin-3 OS=Homo sapiens OX=9606 GN=LGALS3 PE=1 SV=5	1	6	6	6	2	3	4	4	5	5	3	2	3	4	4	5	5	3	2	3	4	4	5	5	3	28	28	28	26.152	250	250	0	11.992	3.1721	1.403	4.9419	26	11	Leave out requantified	3.3515	3.3352	3.6218	3.9444
515	sp|P17980|PRS6A_HUMAN	sp|P17980|PRS6A_HUMAN	18	18	18	sp|P17980|PRS6A_HUMAN 26S proteasome regulatory subunit 6A OS=Homo sapiens OX=9606 GN=PSMC3 PE=1 SV=3	1	18	18	18	10	11	9	12	10	7	9	10	11	9	12	10	7	9	10	11	9	12	10	7	9	49.9	49.9	49.9	49.203	439	439	0	152.19	2.8156	1.2634	75.211	73	35	Leave out requantified	2.69	2.8283	3.5617	2.8593
516	sp|P17987|TCPA_HUMAN	sp|P17987|TCPA_HUMAN	24	24	24	sp|P17987|TCPA_HUMAN T-complex protein 1 subunit alpha OS=Homo sapiens OX=9606 GN=TCP1 PE=1 SV=1	1	24	24	24	14	14	15	16	16	19	18	14	14	15	16	16	19	18	14	14	15	16	16	19	18	53.1	53.1	53.1	60.343	556	556	0	189.36	3.2874	1.4779	22.274	120	59	Leave out requantified	4.8388	3.5529	4.6141	4.0495
517	sp|P18031|PTN1_HUMAN	sp|P18031|PTN1_HUMAN	6	6	6	sp|P18031|PTN1_HUMAN Tyrosine-protein phosphatase non-receptor type 1 OS=Homo sapiens OX=9606 GN=PTPN1 PE=1 SV=1	1	6	6	6	3	5	1	0	2	3	3	3	5	1	0	2	3	3	3	5	1	0	2	3	3	18.4	18.4	18.4	49.966	435	435	0	11.517	3.4477	1.404	18.008	14	7	Leave out requantified	3.364	3.8157	2.5331
518	sp|P18077|RL35A_HUMAN	sp|P18077|RL35A_HUMAN	3	3	3	sp|P18077|RL35A_HUMAN 60S ribosomal protein L35a OS=Homo sapiens OX=9606 GN=RPL35A PE=1 SV=2	1	3	3	3	1	1	2	2	2	2	1	1	1	2	2	2	2	1	1	1	2	2	2	2	1	18.2	18.2	18.2	12.538	110	110	0.0055556	1.2208	3.5755	2.3065	86.428	4	1	Median			4.3972	0.94633
519	sp|P18085|ARF4_HUMAN	sp|P18085|ARF4_HUMAN	10	5	5	sp|P18085|ARF4_HUMAN ADP-ribosylation factor 4 OS=Homo sapiens OX=9606 GN=ARF4 PE=1 SV=3	1	10	5	5	8	7	5	6	8	5	8	4	4	2	2	4	1	4	4	4	2	2	4	1	4	57.2	27.2	27.2	20.511	180	180	0	17.224	5.0209	1.9846	13.591	22	13	Leave out requantified	5.9679	5.718	5.3519	5.0152
520	sp|P18124|RL7_HUMAN	sp|P18124|RL7_HUMAN	14	14	14	sp|P18124|RL7_HUMAN 60S ribosomal protein L7 OS=Homo sapiens OX=9606 GN=RPL7 PE=1 SV=1	1	14	14	14	9	7	5	7	4	5	5	9	7	5	7	4	5	5	9	7	5	7	4	5	5	49.6	49.6	49.6	29.225	248	248	0	39.875	4.9948	2.7803	59.954	47	30	Leave out requantified	5.417	3.8381	6.3084	6.4432
521	sp|P18206|VINC_HUMAN	sp|P18206|VINC_HUMAN	56	56	56	sp|P18206|VINC_HUMAN Vinculin OS=Homo sapiens OX=9606 GN=VCL PE=1 SV=4	1	56	56	56	40	39	40	39	36	42	38	40	39	40	39	36	42	38	40	39	40	39	36	42	38	54.4	54.4	54.4	123.8	1134	1134	0	323.31	2.4888	1.0903	27.255	313	107	Leave out requantified	2.6752	2.5475	2.9263	2.6773
522	sp|P18564|ITB6_HUMAN	sp|P18564|ITB6_HUMAN	1	1	1	sp|P18564|ITB6_HUMAN Integrin beta-6 OS=Homo sapiens OX=9606 GN=ITGB6 PE=1 SV=2	1	1	1	1	1	1	1	1	1	1	1	1	1	1	1	1	1	1	1	1	1	1	1	1	1	1.1	1.1	1.1	85.935	788	788	0	2.302	1.6886	0.80591	9.7349	7	0	Median	1.6886	1.6398	1.8441	1.7667
523	sp|P18621|RL17_HUMAN	sp|P18621|RL17_HUMAN	5	5	5	sp|P18621|RL17_HUMAN 60S ribosomal protein L17 OS=Homo sapiens OX=9606 GN=RPL17 PE=1 SV=3	1	5	5	5	3	4	3	3	4	4	2	3	4	3	3	4	4	2	3	4	3	3	4	4	2	26.6	26.6	26.6	21.397	184	184	0	34.045	6.7369	2.7449	10.479	35	20	Leave out requantified	5.6637	6.6739	5.5833	6.765
524	sp|P18669|PGAM1_HUMAN;sp|P15259|PGAM2_HUMAN;sp|Q8N0Y7|PGAM4_HUMAN	sp|P18669|PGAM1_HUMAN	16;5;4	16;5;4	16;5;4	sp|P18669|PGAM1_HUMAN Phosphoglycerate mutase 1 OS=Homo sapiens OX=9606 GN=PGAM1 PE=1 SV=2	3	16	16	16	13	14	14	14	15	15	13	13	14	14	14	15	15	13	13	14	14	14	15	15	13	77.6	77.6	77.6	28.804	254	254;253;254	0	166.08	2.7514	1.2233	34.054	138	25	Leave out requantified	2.952	3.0585	3.1341	3.035
525	sp|P18754|RCC1_HUMAN	sp|P18754|RCC1_HUMAN	6	6	6	sp|P18754|RCC1_HUMAN Regulator of chromosome condensation OS=Homo sapiens OX=9606 GN=RCC1 PE=1 SV=1	1	6	6	6	5	4	4	3	4	5	4	5	4	4	3	4	5	4	5	4	4	3	4	5	4	23	23	23	44.969	421	421	0	14.46	3.4637	1.3961	41.349	21	14	Leave out requantified	4.4729	3.2427	2.2439	1.6331
526	sp|P19338|NUCL_HUMAN	sp|P19338|NUCL_HUMAN	20	20	20	sp|P19338|NUCL_HUMAN Nucleolin OS=Homo sapiens OX=9606 GN=NCL PE=1 SV=3	1	20	20	20	13	14	15	8	14	13	12	13	14	15	8	14	13	12	13	14	15	8	14	13	12	32	32	32	76.613	710	710	0	159.34	3.8485	1.7661	24.701	98	47	Leave out requantified	3.9002	3.8485	4.3184	4.1762
527	sp|P19367|HXK1_HUMAN;sp|Q2TB90|HKDC1_HUMAN	sp|P19367|HXK1_HUMAN	26;4	26;4	22;3	sp|P19367|HXK1_HUMAN Hexokinase-1 OS=Homo sapiens OX=9606 GN=HK1 PE=1 SV=3	2	26	26	22	15	20	14	13	12	14	14	15	20	14	13	12	14	14	12	16	11	10	11	10	11	34.6	34.6	30.4	102.48	917	917;917	0	115.92	3.8123	1.5631	30.51	94	58	Leave out requantified	4.2144	4.0459	4.3544	3.9017
531	sp|P19623|SPEE_HUMAN	sp|P19623|SPEE_HUMAN	8	8	8	sp|P19623|SPEE_HUMAN Spermidine synthase OS=Homo sapiens OX=9606 GN=SRM PE=1 SV=1	1	8	8	8	3	5	4	3	4	5	4	3	5	4	3	4	5	4	3	5	4	3	4	5	4	37.7	37.7	37.7	33.824	302	302	0	22.597	2.541	1.0256	22.329	25	7	Leave out requantified	0.91269	2.1091	6.0632	2.7008
532	sp|P20042|IF2B_HUMAN	sp|P20042|IF2B_HUMAN	5	5	5	sp|P20042|IF2B_HUMAN Eukaryotic translation initiation factor 2 subunit 2 OS=Homo sapiens OX=9606 GN=EIF2S2 PE=1 SV=2	1	5	5	5	3	4	4	3	4	3	4	3	4	4	3	4	3	4	3	4	4	3	4	3	4	16.5	16.5	16.5	38.388	333	333	0	12.621	2.7633	1.1871	13.73	25	6	Leave out requantified	2.8396	3.093	2.9404	2.6383
533	sp|P20073|ANXA7_HUMAN	sp|P20073|ANXA7_HUMAN	15	15	15	sp|P20073|ANXA7_HUMAN Annexin A7 OS=Homo sapiens OX=9606 GN=ANXA7 PE=1 SV=3	1	15	15	15	9	11	10	8	11	11	11	9	11	10	8	11	11	11	9	11	10	8	11	11	11	36.9	36.9	36.9	52.739	488	488	0	67.167	2.9103	1.2194	15.898	65	40	Leave out requantified	3.1155	3.3421	3.8175	2.9027
534	sp|P20290|BTF3_HUMAN	sp|P20290|BTF3_HUMAN	2	2	2	sp|P20290|BTF3_HUMAN Transcription factor BTF3 OS=Homo sapiens OX=9606 GN=BTF3 PE=1 SV=1	1	2	2	2	2	0	1	0	2	1	1	2	0	1	0	2	1	1	2	0	1	0	2	1	1	22.8	22.8	22.8	22.168	206	206	0	16.65	1.8198	0.74499	29.558	7	6	Median	1.463		1.8198
535	sp|P20339|RAB5A_HUMAN	sp|P20339|RAB5A_HUMAN	5	2	2	sp|P20339|RAB5A_HUMAN Ras-related protein Rab-5A OS=Homo sapiens OX=9606 GN=RAB5A PE=1 SV=2	1	5	2	2	4	3	5	5	5	5	4	1	1	2	2	2	2	2	1	1	2	2	2	2	2	30.2	15.3	15.3	23.658	215	215	0	17.616	2.1925	0.96092	25.66	12	4	Leave out requantified	2.7633	1.0507	1.2085	1.0571
536	sp|P20340|RAB6A_HUMAN;sp|Q9NRW1|RAB6B_HUMAN;sp|Q14964|RB39A_HUMAN	sp|P20340|RAB6A_HUMAN;sp|Q9NRW1|RAB6B_HUMAN	5;4;1	5;4;1	4;3;1	sp|P20340|RAB6A_HUMAN Ras-related protein Rab-6A OS=Homo sapiens OX=9606 GN=RAB6A PE=1 SV=3;sp|Q9NRW1|RAB6B_HUMAN Ras-related protein Rab-6B OS=Homo sapiens OX=9606 GN=RAB6B PE=1 SV=1	3	5	5	4	3	3	4	3	5	4	5	3	3	4	3	5	4	5	3	3	3	3	4	3	4	23.6	23.6	20.2	23.593	208	208;208;217	0	24.338	2.7759	1.2518	24.059	26	5	Leave out requantified	2.856	2.7629	3.3951	3.0557
537	sp|P20618|PSB1_HUMAN	sp|P20618|PSB1_HUMAN	9	9	9	sp|P20618|PSB1_HUMAN Proteasome subunit beta type-1 OS=Homo sapiens OX=9606 GN=PSMB1 PE=1 SV=2	1	9	9	9	6	4	6	7	5	4	3	6	4	6	7	5	4	3	6	4	6	7	5	4	3	46.5	46.5	46.5	26.489	241	241	0	63.414	2.1717	0.87984	36.006	38	14	Leave out requantified	2.2823	2.1105	1.8401	1.9988
538	sp|P20700|LMNB1_HUMAN	sp|P20700|LMNB1_HUMAN	13	11	10	sp|P20700|LMNB1_HUMAN Lamin-B1 OS=Homo sapiens OX=9606 GN=LMNB1 PE=1 SV=2	1	13	11	10	5	4	5	5	6	8	3	4	3	5	4	5	8	3	3	3	5	4	5	8	3	28.2	26.6	25.3	66.408	586	586	0	71.701	2.5011	1.2505	32.518	25	17	Leave out requantified	1.3065	1.3299	2.9582	2.316
540	sp|P20936|RASA1_HUMAN	sp|P20936|RASA1_HUMAN	1	1	1	sp|P20936|RASA1_HUMAN Ras GTPase-activating protein 1 OS=Homo sapiens OX=9606 GN=RASA1 PE=1 SV=1	1	1	1	1	1	1	1	0	1	1	0	1	1	1	0	1	1	0	1	1	1	0	1	1	0	0.9	0.9	0.9	116.4	1047	1047	0.00059382	1.7543	0.79029	0.33781	97.041	5	3	Median	0.79029	0.73754	5.9382
541	sp|P21266|GSTM3_HUMAN	sp|P21266|GSTM3_HUMAN	10	10	9	sp|P21266|GSTM3_HUMAN Glutathione S-transferase Mu 3 OS=Homo sapiens OX=9606 GN=GSTM3 PE=1 SV=3	1	10	10	9	4	6	5	5	6	7	5	4	6	5	5	6	7	5	3	5	4	4	5	6	4	48	48	44	26.559	225	225	0	27.764	2.9415	1.4553	20.731	38	17	Leave out requantified	3.0174	2.8842	3.4323	3.2779
542	sp|P21281|VATB2_HUMAN	sp|P21281|VATB2_HUMAN	4	4	4	sp|P21281|VATB2_HUMAN V-type proton ATPase subunit B, brain isoform OS=Homo sapiens OX=9606 GN=ATP6V1B2 PE=1 SV=3	1	4	4	4	1	2	2	1	2	1	1	1	2	2	1	2	1	1	1	2	2	1	2	1	1	12.1	12.1	12.1	56.5	511	511	0	10.051	0.67355	0.31079	86.098	7	6	Median	1.2949	4.6449	0.61917	0.50594
543	sp|P21283|VATC1_HUMAN	sp|P21283|VATC1_HUMAN	3	3	3	sp|P21283|VATC1_HUMAN V-type proton ATPase subunit C 1 OS=Homo sapiens OX=9606 GN=ATP6V1C1 PE=1 SV=4	1	3	3	3	2	1	1	0	3	3	2	2	1	1	0	3	3	2	2	1	1	0	3	3	2	9.2	9.2	9.2	43.941	382	382	0	6.7064	1.5754	0.58883	66.377	10	8	Median	2.2127		1.4623
544	sp|P21291|CSRP1_HUMAN	sp|P21291|CSRP1_HUMAN	6	6	6	sp|P21291|CSRP1_HUMAN Cysteine and glycine-rich protein 1 OS=Homo sapiens OX=9606 GN=CSRP1 PE=1 SV=3	1	6	6	6	4	4	5	4	3	4	2	4	4	5	4	3	4	2	4	4	5	4	3	4	2	50.8	50.8	50.8	20.567	193	193	0	24.899	2.4526	1.1137	29.827	22	10	Leave out requantified	2.3299	2.6125	4.053	2.5637
545	sp|P21333|FLNA_HUMAN	sp|P21333|FLNA_HUMAN	151	140	137	sp|P21333|FLNA_HUMAN Filamin-A OS=Homo sapiens OX=9606 GN=FLNA PE=1 SV=4	1	151	140	137	126	130	126	128	128	127	133	119	121	117	120	119	117	124	116	118	114	117	116	114	122	68.8	66	65.4	280.74	2647	2647	0	323.31	1.7714	0.76744	31.565	1197	168	Leave out requantified	1.8037	1.7999	1.9501	1.8601
546	sp|P21399|ACOC_HUMAN	sp|P21399|ACOC_HUMAN	9	9	9	sp|P21399|ACOC_HUMAN Cytoplasmic aconitate hydratase OS=Homo sapiens OX=9606 GN=ACO1 PE=1 SV=3	1	9	9	9	4	4	3	4	3	5	5	4	4	3	4	3	5	5	4	4	3	4	3	5	5	17.7	17.7	17.7	98.398	889	889	0	30.048	2.3413	1.0824	43.356	27	19	Leave out requantified	2.2919	2.4348	1.7792	1.7374
547	sp|P21589|5NTD_HUMAN	sp|P21589|5NTD_HUMAN	16	16	16	sp|P21589|5NTD_HUMAN 5-nucleotidase OS=Homo sapiens OX=9606 GN=NT5E PE=1 SV=1	1	16	16	16	11	10	11	10	9	9	9	11	10	11	10	9	9	9	11	10	11	10	9	9	9	43	43	43	63.367	574	574	0	159.95	2.185	0.84952	21.652	75	17	Leave out requantified	2.2753	2.1274	2.2865	2.27
548	sp|P21796|VDAC1_HUMAN	sp|P21796|VDAC1_HUMAN	18	18	18	sp|P21796|VDAC1_HUMAN Voltage-dependent anion-selective channel protein 1 OS=Homo sapiens OX=9606 GN=VDAC1 PE=1 SV=2	1	18	18	18	15	15	15	15	16	17	17	15	15	15	15	16	17	17	15	15	15	15	16	17	17	79.5	79.5	79.5	30.772	283	283	0	173.25	2.8052	1.2039	17.886	114	35	Leave out requantified	3.1936	3.021	3.3129	3.1855
549	sp|P21912|SDHB_HUMAN	sp|P21912|SDHB_HUMAN	3	3	3	sp|P21912|SDHB_HUMAN Succinate dehydrogenase [ubiquinone] iron-sulfur subunit, mitochondrial OS=Homo sapiens OX=9606 GN=SDHB PE=1 SV=3	1	3	3	3	0	0	2	0	1	2	2	0	0	2	0	1	2	2	0	0	2	0	1	2	2	10	10	10	31.629	280	280	0	3.3865	1.9968	0.97342	11.994	7	1	Leave out requantified			2.2461
550	sp|P21926|CD9_HUMAN	sp|P21926|CD9_HUMAN	5	5	5	sp|P21926|CD9_HUMAN CD9 antigen OS=Homo sapiens OX=9606 GN=CD9 PE=1 SV=4	1	5	5	5	5	4	5	4	3	4	2	5	4	5	4	3	4	2	5	4	5	4	3	4	2	25.4	25.4	25.4	25.416	228	228	0	39.778	1.5264	0.66777	27.813	27	1	Leave out requantified	1.5441	1.4933	1.5088	1.6038
552	sp|P21980|TGM2_HUMAN;sp|P49221|TGM4_HUMAN;sp|O43548|TGM5_HUMAN	sp|P21980|TGM2_HUMAN	29;1;1	29;1;1	29;1;1	sp|P21980|TGM2_HUMAN Protein-glutamine gamma-glutamyltransferase 2 OS=Homo sapiens OX=9606 GN=TGM2 PE=1 SV=2	3	29	29	29	22	22	22	24	22	23	23	22	22	22	24	22	23	23	22	22	22	24	22	23	23	52.4	52.4	52.4	77.328	687	687;684;720	0	308.83	3.2789	1.4189	31.567	187	58	Leave out requantified	3.5141	3.3766	4.1242	3.5124
553	sp|P22059|OSBP1_HUMAN	sp|P22059|OSBP1_HUMAN	6	6	6	sp|P22059|OSBP1_HUMAN Oxysterol-binding protein 1 OS=Homo sapiens OX=9606 GN=OSBP PE=1 SV=1	1	6	6	6	3	2	2	3	4	3	4	3	2	2	3	4	3	4	3	2	2	3	4	3	4	10.8	10.8	10.8	89.42	807	807	0	11.623	1.9653	0.94636	28.548	20	4	Leave out requantified	2.2029	2.0294	2.0937	2.0748
554	sp|P22061|PIMT_HUMAN	sp|P22061|PIMT_HUMAN	8	8	8	sp|P22061|PIMT_HUMAN Protein-L-isoaspartate(D-aspartate) O-methyltransferase OS=Homo sapiens OX=9606 GN=PCMT1 PE=1 SV=4	1	8	8	8	5	3	5	5	6	5	5	5	3	5	5	6	5	5	5	3	5	5	6	5	5	58.1	58.1	58.1	24.636	227	227	0	40.263	2.0829	0.93695	30.838	35	22	Leave out requantified	1.763	1.1949	1.0988	1.839
556	sp|P22102|PUR2_HUMAN	sp|P22102|PUR2_HUMAN	20	20	20	sp|P22102|PUR2_HUMAN Trifunctional purine biosynthetic protein adenosine-3 OS=Homo sapiens OX=9606 GN=GART PE=1 SV=1	1	20	20	20	9	13	10	10	9	12	9	9	13	10	10	9	12	9	9	13	10	10	9	12	9	25.9	25.9	25.9	107.77	1010	1010	0	61.465	2.4063	1.0239	25.718	72	15	Leave out requantified	2.4269	2.6281	2.7965	2.4449
557	sp|P22234|PUR6_HUMAN	sp|P22234|PUR6_HUMAN	24	24	24	sp|P22234|PUR6_HUMAN Multifunctional protein ADE2 OS=Homo sapiens OX=9606 GN=PAICS PE=1 SV=3	1	24	24	24	13	17	16	13	20	16	20	13	17	16	13	20	16	20	13	17	16	13	20	16	20	56.5	56.5	56.5	47.079	425	425	0	182.86	2.7809	1.2392	20.223	141	46	Leave out requantified	2.9726	2.8621	3.1685	2.8583
558	sp|P22307|SCP2_HUMAN	sp|P22307|SCP2_HUMAN	4	4	4	sp|P22307|SCP2_HUMAN Sterol carrier protein 2 OS=Homo sapiens OX=9606 GN=SCP2 PE=1 SV=2	1	4	4	4	4	4	3	4	4	4	4	4	4	3	4	4	4	4	4	4	3	4	4	4	4	9.1	9.1	9.1	58.993	547	547	0	27.438	1.973	0.98163	15.942	25	4	Leave out requantified	2.1833	2.529	2.5975	2.1153
559	sp|P22314|UBA1_HUMAN	sp|P22314|UBA1_HUMAN	44	44	44	sp|P22314|UBA1_HUMAN Ubiquitin-like modifier-activating enzyme 1 OS=Homo sapiens OX=9606 GN=UBA1 PE=1 SV=3	1	44	44	44	30	31	37	33	31	33	30	30	31	37	33	31	33	30	30	31	37	33	31	33	30	53.9	53.9	53.9	117.85	1058	1058	0	323.31	2.5167	1.0159	24.316	281	44	Leave out requantified	2.7199	2.5309	2.8201	2.5205
560	sp|P22392|NDKB_HUMAN;sp|O60361|NDK8_HUMAN	sp|P22392|NDKB_HUMAN;sp|O60361|NDK8_HUMAN	14;8	14;8	9;6	sp|P22392|NDKB_HUMAN Nucleoside diphosphate kinase B OS=Homo sapiens OX=9606 GN=NME2 PE=1 SV=1;sp|O60361|NDK8_HUMAN Putative nucleoside diphosphate kinase OS=Homo sapiens OX=9606 GN=NME2P1 PE=5 SV=1	2	14	14	9	12	12	13	12	12	12	11	12	12	13	12	12	12	11	8	8	8	7	8	7	6	84.2	84.2	53.3	17.298	152	152;137	0	91.567	2.9537	1.5615	23.568	127	21	Leave out requantified	2.9068	2.8587	3.2021	2.8444
561	sp|P22413|ENPP1_HUMAN	sp|P22413|ENPP1_HUMAN	4	4	4	sp|P22413|ENPP1_HUMAN Ectonucleotide pyrophosphatase/phosphodiesterase family member 1 OS=Homo sapiens OX=9606 GN=ENPP1 PE=1 SV=2	1	4	4	4	2	1	1	2	2	3	2	2	1	1	2	2	3	2	2	1	1	2	2	3	2	5.7	5.7	5.7	104.92	925	925	0	10.132	1.6069	0.64791	12.255	13	1	Leave out requantified	1.7743	1.4207	1.7513	1.5252
562	sp|P22626|ROA2_HUMAN	sp|P22626|ROA2_HUMAN	34	34	33	sp|P22626|ROA2_HUMAN Heterogeneous nuclear ribonucleoproteins A2/B1 OS=Homo sapiens OX=9606 GN=HNRNPA2B1 PE=1 SV=2	1	34	34	33	26	27	26	28	30	29	30	26	27	26	28	30	29	30	25	26	25	27	29	28	29	75.9	75.9	75.9	37.429	353	353	0	323.31	4.3113	2.1129	32.153	308	87	Leave out requantified	4.9319	4.6962	5.374	4.9096
563	sp|P22676|CALB2_HUMAN;sp|P05937|CALB1_HUMAN	sp|P22676|CALB2_HUMAN	3;1	3;1	3;1	sp|P22676|CALB2_HUMAN Calretinin OS=Homo sapiens OX=9606 GN=CALB2 PE=2 SV=2	2	3	3	3	2	2	3	2	2	2	2	2	2	3	2	2	2	2	2	2	3	2	2	2	2	11.1	11.1	11.1	31.54	271	271;261	0	7.7258	1.9966	0.84384	20.685	15	2	Leave out requantified	1.8013	2.0578	1.8004	2.0992
565	sp|P22695|QCR2_HUMAN	sp|P22695|QCR2_HUMAN	6	6	6	sp|P22695|QCR2_HUMAN Cytochrome b-c1 complex subunit 2, mitochondrial OS=Homo sapiens OX=9606 GN=UQCRC2 PE=1 SV=3	1	6	6	6	2	1	3	1	2	2	3	2	1	3	1	2	2	3	2	1	3	1	2	2	3	16.6	16.6	16.6	48.442	453	453	0	21.997	2.3346	0.93414	16.66	13	6	Leave out requantified	2.6026	2.8178	2.4538	3.5075
566	sp|P23229|ITA6_HUMAN	sp|P23229|ITA6_HUMAN	13	13	13	sp|P23229|ITA6_HUMAN Integrin alpha-6 OS=Homo sapiens OX=9606 GN=ITGA6 PE=1 SV=5	1	13	13	13	6	6	6	6	10	8	5	6	6	6	6	10	8	5	6	6	6	6	10	8	5	16.7	16.7	16.7	126.6	1130	1130	0	37.515	1.5136	0.68475	41.201	45	19	Leave out requantified	1.947	1.7885	2.0839	1.9407
567	sp|P23246|SFPQ_HUMAN	sp|P23246|SFPQ_HUMAN	5	5	4	sp|P23246|SFPQ_HUMAN Splicing factor, proline- and glutamine-rich OS=Homo sapiens OX=9606 GN=SFPQ PE=1 SV=2	1	5	5	4	1	3	3	2	2	0	0	1	3	3	2	2	0	0	1	2	2	1	1	0	0	8.2	8.2	7.1	76.149	707	707	0	5.634	1.9895	0.70734	59.992	11	9	Median	1.5824	2.0961	2.5013	1.1434
568	sp|P23284|PPIB_HUMAN	sp|P23284|PPIB_HUMAN	12	12	12	sp|P23284|PPIB_HUMAN Peptidyl-prolyl cis-trans isomerase B OS=Homo sapiens OX=9606 GN=PPIB PE=1 SV=2	1	12	12	12	11	12	8	9	11	11	9	11	12	8	9	11	11	9	11	12	8	9	11	11	9	55.1	55.1	55.1	23.742	216	216	0	54.275	2.9502	1.2537	22.922	84	16	Leave out requantified	3.0568	3.2559	3.6659	3.3435
569	sp|P23368|MAOM_HUMAN;sp|Q16798|MAON_HUMAN	sp|P23368|MAOM_HUMAN;sp|Q16798|MAON_HUMAN	2;1	2;1	2;1	sp|P23368|MAOM_HUMAN NAD-dependent malic enzyme, mitochondrial OS=Homo sapiens OX=9606 GN=ME2 PE=1 SV=1;sp|Q16798|MAON_HUMAN NADP-dependent malic enzyme, mitochondrial OS=Homo sapiens OX=9606 GN=ME3 PE=2 SV=2	2	2	2	2	0	1	1	2	1	0	1	0	1	1	2	1	0	1	0	1	1	2	1	0	1	2.9	2.9	2.9	65.443	584	584;604	0.0096567	1.0043	1.6443	0.70055	44.994	6	5	Median		2.8157	1.767	1.1344
570	sp|P23381|SYWC_HUMAN	sp|P23381|SYWC_HUMAN	12	12	12	sp|P23381|SYWC_HUMAN Tryptophan--tRNA ligase, cytoplasmic OS=Homo sapiens OX=9606 GN=WARS1 PE=1 SV=2	1	12	12	12	7	5	7	6	6	9	7	7	5	7	6	6	9	7	7	5	7	6	6	9	7	31.8	31.8	31.8	53.165	471	471	0	60.265	2.8254	1.0068	37.398	47	24	Leave out requantified	3.0654	3.0202	2.8735	2.0744
571	sp|P23396|RS3_HUMAN	sp|P23396|RS3_HUMAN	19	19	19	sp|P23396|RS3_HUMAN 40S ribosomal protein S3 OS=Homo sapiens OX=9606 GN=RPS3 PE=1 SV=2	1	19	19	19	8	11	13	13	12	12	14	8	11	13	13	12	12	14	8	11	13	13	12	12	14	74.9	74.9	74.9	26.688	243	243	0	94.954	4.9812	1.9693	32.764	90	35	Leave out requantified	4.5153	4.2853	5.5291	5.6358
572	sp|P23497|SP100_HUMAN;sp|Q9H930|SP14L_HUMAN	sp|P23497|SP100_HUMAN	5;1	3;1	3;1	sp|P23497|SP100_HUMAN Nuclear autoantigen Sp-100 OS=Homo sapiens OX=9606 GN=SP100 PE=1 SV=3	2	5	3	3	2	2	2	3	2	2	2	1	0	1	1	0	1	1	1	0	1	1	0	1	1	6.7	4.9	4.9	100.42	879	879;580	0.0023135	1.5063	1.2711	0.64371	109.3	3	3	Median	0.29426			1.6835
573	sp|P23526|SAHH_HUMAN	sp|P23526|SAHH_HUMAN	22	22	22	sp|P23526|SAHH_HUMAN Adenosylhomocysteinase OS=Homo sapiens OX=9606 GN=AHCY PE=1 SV=4	1	22	22	22	15	16	15	15	14	15	12	15	16	15	15	14	15	12	15	16	15	15	14	15	12	50	50	50	47.716	432	432	0	82.034	3.4994	1.4037	26.201	115	45	Leave out requantified	3.6884	3.4322	4.2183	3.9492
574	sp|P23528|COF1_HUMAN	sp|P23528|COF1_HUMAN	21	21	17	sp|P23528|COF1_HUMAN Cofilin-1 OS=Homo sapiens OX=9606 GN=CFL1 PE=1 SV=3	1	21	21	17	17	19	18	18	19	19	20	17	19	18	18	19	19	20	13	15	14	14	15	15	16	89.8	89.8	66.9	18.502	166	166	0	323.31	2.0723	1.2579	31.049	225	19	Leave out requantified	2.1523	2.1238	2.3561	2.3227
575	sp|P23634|AT2B4_HUMAN;sp|P20020|AT2B1_HUMAN;sp|Q16720|AT2B3_HUMAN;sp|Q01814|AT2B2_HUMAN	sp|P23634|AT2B4_HUMAN;sp|P20020|AT2B1_HUMAN;sp|Q16720|AT2B3_HUMAN;sp|Q01814|AT2B2_HUMAN	6;5;4;3	6;5;4;3	6;5;4;3	sp|P23634|AT2B4_HUMAN Plasma membrane calcium-transporting ATPase 4 OS=Homo sapiens OX=9606 GN=ATP2B4 PE=1 SV=2;sp|P20020|AT2B1_HUMAN Plasma membrane calcium-transporting ATPase 1 OS=Homo sapiens OX=9606 GN=ATP2B1 PE=1 SV=4;sp|Q16720|AT2B3_HUMAN Plasma mem	4	6	6	6	4	4	2	1	1	3	5	4	4	2	1	1	3	5	4	4	2	1	1	3	5	6.5	6.5	6.5	137.92	1241	1241;1220;1220;1243	0	12.432	1.5319	0.75276	94.412	19	17	Median	1.7095	1.5894	0.45846	2.2641
576	sp|P23919|KTHY_HUMAN	sp|P23919|KTHY_HUMAN	6	6	6	sp|P23919|KTHY_HUMAN Thymidylate kinase OS=Homo sapiens OX=9606 GN=DTYMK PE=1 SV=4	1	6	6	6	1	1	2	1	2	3	3	1	1	2	1	2	3	3	1	1	2	1	2	3	3	27.8	27.8	27.8	23.819	212	212	0	6.5854	2.2037	1.0457	55.93	13	11	Median	2.4144	1.5971	2.7496	2.2037
577	sp|P24390|ERD21_HUMAN	sp|P24390|ERD21_HUMAN	2	1	1	sp|P24390|ERD21_HUMAN ER lumen protein-retaining receptor 1 OS=Homo sapiens OX=9606 GN=KDELR1 PE=1 SV=1	1	2	1	1	2	0	2	1	1	1	0	1	0	1	1	1	0	0	1	0	1	1	1	0	0	14.2	9	9	24.542	212	212	0	14.083	4.005	1.0561	32.868	6	5	Linear	2.5598		3.2491	2.8417
578	sp|P24534|EF1B_HUMAN	sp|P24534|EF1B_HUMAN	10	8	8	sp|P24534|EF1B_HUMAN Elongation factor 1-beta OS=Homo sapiens OX=9606 GN=EEF1B2 PE=1 SV=3	1	10	8	8	8	6	7	9	9	6	7	7	4	7	8	7	4	5	7	4	7	8	7	4	5	48.9	44.9	44.9	24.763	225	225	0	142	2.076	0.9875	29.982	45	12	Leave out requantified	2.1402	2.2351	2.3389	2.076
579	sp|P24539|AT5F1_HUMAN	sp|P24539|AT5F1_HUMAN	3	3	3	sp|P24539|AT5F1_HUMAN ATP synthase F(0) complex subunit B1, mitochondrial OS=Homo sapiens OX=9606 GN=ATP5PB PE=1 SV=2	1	3	3	3	1	1	1	2	2	1	0	1	1	1	2	2	1	0	1	1	1	2	2	1	0	15.2	15.2	15.2	28.908	256	256	0	2.491	2.5452	1.1791	40.538	8	7	Median	2.8365	2.6321	1.5174	1.6199
580	sp|P24752|THIL_HUMAN	sp|P24752|THIL_HUMAN	19	19	19	sp|P24752|THIL_HUMAN Acetyl-CoA acetyltransferase, mitochondrial OS=Homo sapiens OX=9606 GN=ACAT1 PE=1 SV=1	1	19	19	19	12	13	14	13	16	14	14	12	13	14	13	16	14	14	12	13	14	13	16	14	14	57.4	57.4	57.4	45.199	427	427	0	187.64	2.5524	1.2022	35.863	115	18	Leave out requantified	3.0576	2.7633	3.1895	3.3533
581	sp|P24844|MYL9_HUMAN	sp|P24844|MYL9_HUMAN	6	2	2	sp|P24844|MYL9_HUMAN Myosin regulatory light polypeptide 9 OS=Homo sapiens OX=9606 GN=MYL9 PE=1 SV=4	1	6	2	2	5	6	3	5	5	5	5	1	2	1	1	1	1	1	1	2	1	1	1	1	1	50.6	17.4	17.4	19.827	172	172	0	5.5424	4.8527	1.4253	37.258	8	5	Plateau	2.9883	2.2598	3.9312	2.0058
582	sp|P25205|MCM3_HUMAN	sp|P25205|MCM3_HUMAN	15	15	15	sp|P25205|MCM3_HUMAN DNA replication licensing factor MCM3 OS=Homo sapiens OX=9606 GN=MCM3 PE=1 SV=3	1	15	15	15	10	8	7	7	11	9	8	10	8	7	7	11	9	8	10	8	7	7	11	9	8	21.7	21.7	21.7	90.98	808	808	0	48.157	3.9834	1.8206	13.95	64	40	Leave out requantified	4.1912	4.8984	2.5621	3.0319
583	sp|P25398|RS12_HUMAN	sp|P25398|RS12_HUMAN	7	7	7	sp|P25398|RS12_HUMAN 40S ribosomal protein S12 OS=Homo sapiens OX=9606 GN=RPS12 PE=1 SV=3	1	7	7	7	6	6	5	4	6	5	4	6	6	5	4	6	5	4	6	6	5	4	6	5	4	57.6	57.6	57.6	14.515	132	132	0	37.413	2.8068	1.1289	41.895	47	10	Leave out requantified	2.9399	2.4582	3.087	3.1763
584	sp|P25685|DNJB1_HUMAN	sp|P25685|DNJB1_HUMAN	7	7	6	sp|P25685|DNJB1_HUMAN DnaJ homolog subfamily B member 1 OS=Homo sapiens OX=9606 GN=DNAJB1 PE=1 SV=4	1	7	7	6	5	5	5	3	5	4	3	5	5	5	3	5	4	3	5	4	5	3	5	4	3	23.5	23.5	20	38.044	340	340	0	21.893	2.8869	1.2518	35.44	22	6	Leave out requantified	2.9624	3.0903	3.6054	1.368
585	sp|P25705|ATPA_HUMAN	sp|P25705|ATPA_HUMAN	22	22	22	sp|P25705|ATPA_HUMAN ATP synthase subunit alpha, mitochondrial OS=Homo sapiens OX=9606 GN=ATP5F1A PE=1 SV=1	1	22	22	22	19	17	15	17	14	16	15	19	17	15	17	14	16	15	19	17	15	17	14	16	15	46.7	46.7	46.7	59.75	553	553	0	162.47	3.6532	1.4107	41.41	113	35	Leave out requantified	3.5696	3.6223	3.9393	3.6965
586	sp|P25786|PSA1_HUMAN	sp|P25786|PSA1_HUMAN	19	19	19	sp|P25786|PSA1_HUMAN Proteasome subunit alpha type-1 OS=Homo sapiens OX=9606 GN=PSMA1 PE=1 SV=1	1	19	19	19	14	16	12	14	12	15	11	14	16	12	14	12	15	11	14	16	12	14	12	15	11	81	81	81	29.555	263	263	0	94.698	2.2317	1.0089	25.577	115	12	Leave out requantified	2.4888	2.2824	2.4057	2.4716
587	sp|P25787|PSA2_HUMAN	sp|P25787|PSA2_HUMAN	11	11	11	sp|P25787|PSA2_HUMAN Proteasome subunit alpha type-2 OS=Homo sapiens OX=9606 GN=PSMA2 PE=1 SV=2	1	11	11	11	7	5	8	8	9	6	8	7	5	8	8	9	6	8	7	5	8	8	9	6	8	63.7	63.7	63.7	25.898	234	234	0	129.43	2.0871	0.95623	28.944	66	17	Leave out requantified	2.1532	2.4602	2.085	1.9324
588	sp|P25788|PSA3_HUMAN	sp|P25788|PSA3_HUMAN	12	12	12	sp|P25788|PSA3_HUMAN Proteasome subunit alpha type-3 OS=Homo sapiens OX=9606 GN=PSMA3 PE=1 SV=2	1	12	12	12	10	10	7	7	8	6	8	10	10	7	7	8	6	8	10	10	7	7	8	6	8	46.3	46.3	46.3	28.433	255	255	0	46.979	1.9912	0.88537	19.921	62	7	Leave out requantified	2.1001	1.9439	2.3625	2.2806
589	sp|P25789|PSA4_HUMAN	sp|P25789|PSA4_HUMAN	13	13	13	sp|P25789|PSA4_HUMAN Proteasome subunit alpha type-4 OS=Homo sapiens OX=9606 GN=PSMA4 PE=1 SV=1	1	13	13	13	8	10	11	7	9	7	8	8	10	11	7	9	7	8	8	10	11	7	9	7	8	62.1	62.1	62.1	29.483	261	261	0	205.22	2.249	0.90689	25.166	71	6	Leave out requantified	2.2961	2.302	2.3547	2.2631
590	sp|P26006|ITA3_HUMAN	sp|P26006|ITA3_HUMAN	24	24	24	sp|P26006|ITA3_HUMAN Integrin alpha-3 OS=Homo sapiens OX=9606 GN=ITGA3 PE=1 SV=5	1	24	24	24	20	23	21	21	22	22	21	20	23	21	21	22	22	21	20	23	21	21	22	22	21	26.2	26.2	26.2	116.61	1051	1051	0	179.09	1.6396	0.62919	21.928	197	17	Leave out requantified	1.6896	1.4928	1.6976	1.7144
591	sp|P26038|MOES_HUMAN	sp|P26038|MOES_HUMAN	47	47	36	sp|P26038|MOES_HUMAN Moesin OS=Homo sapiens OX=9606 GN=MSN PE=1 SV=3	1	47	47	36	39	38	36	32	36	36	35	39	38	36	32	36	36	35	29	28	26	21	27	26	25	74.2	74.2	56.2	67.819	577	577	0	323.31	4.395	1.9863	42.019	309	114	Leave out requantified	4.5803	4.2429	5.3364	4.8046
592	sp|P26196|DDX6_HUMAN	sp|P26196|DDX6_HUMAN	10	10	10	sp|P26196|DDX6_HUMAN Probable ATP-dependent RNA helicase DDX6 OS=Homo sapiens OX=9606 GN=DDX6 PE=1 SV=2	1	10	10	10	3	6	3	5	6	2	6	3	6	3	5	6	2	6	3	6	3	5	6	2	6	26.9	26.9	26.9	54.416	483	483	0	30.724	2.6508	1.0761	56.825	30	10	Leave out requantified	2.5946	2.3488	3.1386	2.9971
593	sp|P26232|CTNA2_HUMAN	sp|P26232|CTNA2_HUMAN	4	1	1	sp|P26232|CTNA2_HUMAN Catenin alpha-2 OS=Homo sapiens OX=9606 GN=CTNNA2 PE=1 SV=5	1	4	1	1	3	2	3	4	3	3	3	1	1	1	1	1	0	1	1	1	1	1	1	0	1	6.5	1.9	1.9	105.31	953	953	0	6.4943	2.4993	0.88421	17.183	10	3	Linear	2.141	2.0837	1.4462	2.1358
595	sp|P26368|U2AF2_HUMAN	sp|P26368|U2AF2_HUMAN	5	5	5	sp|P26368|U2AF2_HUMAN Splicing factor U2AF 65 kDa subunit OS=Homo sapiens OX=9606 GN=U2AF2 PE=1 SV=4	1	5	5	5	1	3	1	2	3	3	1	1	3	1	2	3	3	1	1	3	1	2	3	3	1	16.8	16.8	16.8	53.5	475	475	0	51.15	2.3462	0.9508	39.165	7	5	Median		2.1818	2.6161
596	sp|P26373|RL13_HUMAN	sp|P26373|RL13_HUMAN	6	6	6	sp|P26373|RL13_HUMAN 60S ribosomal protein L13 OS=Homo sapiens OX=9606 GN=RPL13 PE=1 SV=4	1	6	6	6	5	4	4	4	5	4	4	5	4	4	4	5	4	4	5	4	4	4	5	4	4	30.8	30.8	30.8	24.261	211	211	0	28.218	5.7551	2.4735	17.539	37	6	Leave out requantified	5.8294	5.456	7.0878	6.3254
597	sp|P26447|S10A4_HUMAN	sp|P26447|S10A4_HUMAN	6	6	6	sp|P26447|S10A4_HUMAN Protein S100-A4 OS=Homo sapiens OX=9606 GN=S100A4 PE=1 SV=1	1	6	6	6	5	5	5	4	6	5	5	5	5	5	4	6	5	5	5	5	5	4	6	5	5	36.6	36.6	36.6	11.728	101	101	0	12.988	2.3562	1.0369	6.4241	52	3	Leave out requantified	2.3926	2.4905	2.5217	2.2385
598	sp|P26599|PTBP1_HUMAN;sp|O95758|PTBP3_HUMAN	sp|P26599|PTBP1_HUMAN	18;3	18;3	18;3	sp|P26599|PTBP1_HUMAN Polypyrimidine tract-binding protein 1 OS=Homo sapiens OX=9606 GN=PTBP1 PE=1 SV=1	2	18	18	18	14	13	10	10	14	10	11	14	13	10	10	14	10	11	14	13	10	10	14	10	11	58	58	58	57.221	531	531;552	0	208.2	3.7144	1.647	17.49	105	39	Leave out requantified	3.6878	4.0114	5.3718	4.1903
599	sp|P26639|SYTC_HUMAN;sp|A2RTX5|SYTC2_HUMAN	sp|P26639|SYTC_HUMAN	34;5	34;5	34;5	sp|P26639|SYTC_HUMAN Threonine--tRNA ligase 1, cytoplasmic OS=Homo sapiens OX=9606 GN=TARS1 PE=1 SV=3	2	34	34	34	19	25	18	23	25	29	30	19	25	18	23	25	29	30	19	25	18	23	25	29	30	51.9	51.9	51.9	83.434	723	723;802	0	244.88	2.5268	1.1228	26.634	185	46	Leave out requantified	3.0363	2.6358	3.0025	2.6794
600	sp|P26640|SYVC_HUMAN	sp|P26640|SYVC_HUMAN	30	30	30	sp|P26640|SYVC_HUMAN Valine--tRNA ligase OS=Homo sapiens OX=9606 GN=VARS1 PE=1 SV=4	1	30	30	30	16	15	14	13	15	17	12	16	15	14	13	15	17	12	16	15	14	13	15	17	12	27.2	27.2	27.2	140.47	1264	1264	0	86.362	3.1906	1.2873	27.799	102	40	Leave out requantified	3.2698	3.3763	3.7546	3.4107
601	sp|P26641|EF1G_HUMAN	sp|P26641|EF1G_HUMAN	27	27	27	sp|P26641|EF1G_HUMAN Elongation factor 1-gamma OS=Homo sapiens OX=9606 GN=EEF1G PE=1 SV=3	1	27	27	27	25	22	23	24	23	25	24	25	22	23	24	23	25	24	25	22	23	24	23	25	24	61.8	61.8	61.8	50.118	437	437	0	248.17	2.5679	1.1264	31.96	248	41	Leave out requantified	2.7123	2.5492	2.8212	2.6597
602	sp|P27144|KAD4_HUMAN	sp|P27144|KAD4_HUMAN	2	2	2	sp|P27144|KAD4_HUMAN Adenylate kinase 4, mitochondrial OS=Homo sapiens OX=9606 GN=AK4 PE=1 SV=1	1	2	2	2	1	0	1	1	0	0	0	1	0	1	1	0	0	0	1	0	1	1	0	0	0	11.7	11.7	11.7	25.268	223	223	0.00058893	1.6857	0.75788	0.29124	124.37	3	3	Median	5.712		0.75788	0.51038
603	sp|P27348|1433T_HUMAN	sp|P27348|1433T_HUMAN	22	17	16	sp|P27348|1433T_HUMAN 14-3-3 protein theta OS=Homo sapiens OX=9606 GN=YWHAQ PE=1 SV=1	1	22	17	16	17	19	19	19	16	18	18	12	14	14	14	12	13	14	11	13	13	13	11	12	13	72.7	61.6	58.8	27.764	245	245	0	220.94	2.0027	0.9123	23.879	127	21	Leave out requantified	2.012	2.0023	2.1865	2.0449
604	sp|P27635|RL10_HUMAN;sp|Q96L21|RL10L_HUMAN	sp|P27635|RL10_HUMAN	10;4	10;4	10;4	sp|P27635|RL10_HUMAN 60S ribosomal protein L10 OS=Homo sapiens OX=9606 GN=RPL10 PE=1 SV=4	2	10	10	10	6	10	7	8	4	7	8	6	10	7	8	4	7	8	6	10	7	8	4	7	8	43	43	43	24.604	214	214;214	0	54.231	5.998	2.3179	18.812	49	30	Leave out requantified	6.0774	6.2289	5.3064	5.9689
605	sp|P27694|RFA1_HUMAN	sp|P27694|RFA1_HUMAN	16	16	16	sp|P27694|RFA1_HUMAN Replication protein A 70 kDa DNA-binding subunit OS=Homo sapiens OX=9606 GN=RPA1 PE=1 SV=2	1	16	16	16	9	9	9	5	7	9	7	9	9	9	5	7	9	7	9	9	9	5	7	9	7	36.2	36.2	36.2	68.137	616	616	0	98.312	1.9091	0.89406	26.831	58	23	Leave out requantified	1.9555	1.9907	2.1792	1.9806
606	sp|P27695|APEX1_HUMAN	sp|P27695|APEX1_HUMAN	11	11	11	sp|P27695|APEX1_HUMAN DNA-(apurinic or apyrimidinic site) endonuclease OS=Homo sapiens OX=9606 GN=APEX1 PE=1 SV=2	1	11	11	11	5	7	5	5	4	5	3	5	7	5	5	4	5	3	5	7	5	5	4	5	3	55.7	55.7	55.7	35.554	318	318	0	63.492	2.756	1.3055	39.364	37	16	Leave out requantified	2.2458	2.9547	2.4187	3.0594
607	sp|P27701|CD82_HUMAN	sp|P27701|CD82_HUMAN	4	4	4	sp|P27701|CD82_HUMAN CD82 antigen OS=Homo sapiens OX=9606 GN=CD82 PE=1 SV=1	1	4	4	4	1	1	2	3	3	2	4	1	1	2	3	3	2	4	1	1	2	3	3	2	4	18.7	18.7	18.7	29.625	267	267	0	11.181	1.4431	0.60973	21.389	18	3	Leave out requantified	1.4367	1.3548	1.6159	1.353
608	sp|P27708|PYR1_HUMAN	sp|P27708|PYR1_HUMAN	16	16	16	sp|P27708|PYR1_HUMAN CAD protein OS=Homo sapiens OX=9606 GN=CAD PE=1 SV=3	1	16	16	16	11	8	7	6	13	8	9	11	8	7	6	13	8	9	11	8	7	6	13	8	9	10.2	10.2	10.2	242.98	2225	2225	0	41.731	4.4832	1.883	63.069	61	45	Leave out requantified	4.6782	6.5355	3.5581	5.0864
609	sp|P27797|CALR_HUMAN	sp|P27797|CALR_HUMAN	20	20	20	sp|P27797|CALR_HUMAN Calreticulin OS=Homo sapiens OX=9606 GN=CALR PE=1 SV=1	1	20	20	20	14	18	18	14	16	15	15	14	18	18	14	16	15	15	14	18	18	14	16	15	15	61.2	61.2	61.2	48.141	417	417	0	149.58	2.6383	1.1869	58.355	161	16	Leave out requantified	2.6493	2.4869	2.9042	2.4668
610	sp|P27816|MAP4_HUMAN	sp|P27816|MAP4_HUMAN	6	6	6	sp|P27816|MAP4_HUMAN Microtubule-associated protein 4 OS=Homo sapiens OX=9606 GN=MAP4 PE=1 SV=3	1	6	6	6	2	3	5	4	5	1	3	2	3	5	4	5	1	3	2	3	5	4	5	1	3	7.2	7.2	7.2	121	1152	1152	0	14.726	2.371	1.0577	40.247	21	11	Leave out requantified	2.667	1.9876	2.1124	2.0639
611	sp|P27824|CALX_HUMAN	sp|P27824|CALX_HUMAN	28	28	27	sp|P27824|CALX_HUMAN Calnexin OS=Homo sapiens OX=9606 GN=CANX PE=1 SV=2	1	28	28	27	19	22	18	21	19	23	24	19	22	18	21	19	23	24	19	22	17	20	19	23	24	44.4	44.4	43.4	67.567	592	592	0	173.82	1.9891	0.98059	34.753	165	22	Leave out requantified	1.9467	1.9189	2.3205	2.2054
612	sp|P28062|PSB8_HUMAN	sp|P28062|PSB8_HUMAN	1	1	1	sp|P28062|PSB8_HUMAN Proteasome subunit beta type-8 OS=Homo sapiens OX=9606 GN=PSMB8 PE=1 SV=3	1	1	1	1	1	1	1	1	1	1	1	1	1	1	1	1	1	1	1	1	1	1	1	1	1	4	4	4	30.354	276	276	0	2.676	2.3409	0.85498	9.5358	7	0	Median	2.4157	2.3409	2.759	1.8636
613	sp|P28065|PSB9_HUMAN	sp|P28065|PSB9_HUMAN	3	3	3	sp|P28065|PSB9_HUMAN Proteasome subunit beta type-9 OS=Homo sapiens OX=9606 GN=PSMB9 PE=1 SV=2	1	3	3	3	1	1	1	0	3	0	1	1	1	1	0	3	0	1	1	1	1	0	3	0	1	18.3	18.3	18.3	23.264	219	219	0	4.1861	1.5888	0.63558	24.218	7	2	Leave out requantified	1.3994	0.56199	1.6612
614	sp|P28066|PSA5_HUMAN	sp|P28066|PSA5_HUMAN	11	11	11	sp|P28066|PSA5_HUMAN Proteasome subunit alpha type-5 OS=Homo sapiens OX=9606 GN=PSMA5 PE=1 SV=3	1	11	11	11	7	9	6	8	10	9	9	7	9	6	8	10	9	9	7	9	6	8	10	9	9	60.6	60.6	60.6	26.411	241	241	0	74.777	1.924	0.82489	22.247	63	12	Leave out requantified	2.0645	1.7981	1.708	2.0906
615	sp|P28070|PSB4_HUMAN	sp|P28070|PSB4_HUMAN	8	8	8	sp|P28070|PSB4_HUMAN Proteasome subunit beta type-4 OS=Homo sapiens OX=9606 GN=PSMB4 PE=1 SV=4	1	8	8	8	5	8	7	7	8	5	6	5	8	7	7	8	5	6	5	8	7	7	8	5	6	48.5	48.5	48.5	29.204	264	264	0	92.858	2.0713	0.80501	9.0582	49	13	Leave out requantified	2.2646	1.9962	2.279	2.1734
616	sp|P28072|PSB6_HUMAN	sp|P28072|PSB6_HUMAN	7	7	7	sp|P28072|PSB6_HUMAN Proteasome subunit beta type-6 OS=Homo sapiens OX=9606 GN=PSMB6 PE=1 SV=4	1	7	7	7	7	7	6	6	6	6	5	7	7	6	6	6	6	5	7	7	6	6	6	6	5	45.2	45.2	45.2	25.357	239	239	0	72.042	2.0289	0.80619	23.855	46	10	Leave out requantified	2.0143	2.0409	2.1163	2.0515
617	sp|P28074|PSB5_HUMAN	sp|P28074|PSB5_HUMAN	13	13	13	sp|P28074|PSB5_HUMAN Proteasome subunit beta type-5 OS=Homo sapiens OX=9606 GN=PSMB5 PE=1 SV=3	1	13	13	13	12	8	11	11	8	10	7	12	8	11	11	8	10	7	12	8	11	11	8	10	7	55.9	55.9	55.9	28.48	263	263	0	89.161	2.1604	0.86978	50.492	68	22	Leave out requantified	2.227	2.3937	2.2924	2.4068
618	sp|P28288|ABCD3_HUMAN	sp|P28288|ABCD3_HUMAN	2	2	2	sp|P28288|ABCD3_HUMAN ATP-binding cassette sub-family D member 3 OS=Homo sapiens OX=9606 GN=ABCD3 PE=1 SV=1	1	2	2	2	1	1	1	2	1	1	1	1	1	1	2	1	1	1	1	1	1	2	1	1	1	3.9	3.9	3.9	75.475	659	659	0	4.6912	2.6238	1.0757	40.628	7	7	Median		4.1724	3.0446	1.7496
619	sp|P28331|NDUS1_HUMAN	sp|P28331|NDUS1_HUMAN	3	3	3	sp|P28331|NDUS1_HUMAN NADH-ubiquinone oxidoreductase 75 kDa subunit, mitochondrial OS=Homo sapiens OX=9606 GN=NDUFS1 PE=1 SV=3	1	3	3	3	1	0	0	1	0	1	1	1	0	0	1	0	1	1	1	0	0	1	0	1	1	5.2	5.2	5.2	79.467	727	727	0	3.5545	0.92337	0.39362	81.855	4	4	Median	2.1516			0.87531
620	sp|P28370|SMCA1_HUMAN	sp|P28370|SMCA1_HUMAN	5	5	1	sp|P28370|SMCA1_HUMAN Probable global transcription activator SNF2L1 OS=Homo sapiens OX=9606 GN=SMARCA1 PE=1 SV=2	1	5	5	1	1	0	1	2	2	1	1	1	0	1	2	2	1	1	1	0	1	1	0	1	0	4	4	0.9	122.6	1054	1054	0	5.3852	1.3276	0.69599	27.439	8	8	Median	1.2531		1.1474	1.5982
621	sp|P28482|MK01_HUMAN;sp|P27361|MK03_HUMAN;sp|P31152|MK04_HUMAN;sp|Q16659|MK06_HUMAN	sp|P28482|MK01_HUMAN	9;1;1;1	9;1;1;1	9;1;1;1	sp|P28482|MK01_HUMAN Mitogen-activated protein kinase 1 OS=Homo sapiens OX=9606 GN=MAPK1 PE=1 SV=3	4	9	9	9	1	5	3	3	4	2	3	1	5	3	3	4	2	3	1	5	3	3	4	2	3	42.2	42.2	42.2	41.389	360	360;379;587;721	0	13.612	2.367	1.1911	35.454	18	10	Leave out requantified	3.8657	2.3325	0.75224	2.56
622	sp|P28838|AMPL_HUMAN	sp|P28838|AMPL_HUMAN	16	16	16	sp|P28838|AMPL_HUMAN Cytosol aminopeptidase OS=Homo sapiens OX=9606 GN=LAP3 PE=1 SV=3	1	16	16	16	11	13	11	13	9	12	13	11	13	11	13	9	12	13	11	13	11	13	9	12	13	43	43	43	56.166	519	519	0	87.131	3.2127	1.3006	51.575	80	33	Leave out requantified	3.4022	3.0842	4.2307	4.1619
623	sp|P29034|S10A2_HUMAN	sp|P29034|S10A2_HUMAN	1	1	1	sp|P29034|S10A2_HUMAN Protein S100-A2 OS=Homo sapiens OX=9606 GN=S100A2 PE=1 SV=3	1	1	1	1	1	1	1	1	1	1	0	1	1	1	1	1	1	0	1	1	1	1	1	1	0	10.2	10.2	10.2	11.117	98	98	0.00059067	1.7022	2.2556	1.2971	15.825	8	2	Median	2.3354	1.8157	2.4471	2.116
624	sp|P29218|IMPA1_HUMAN	sp|P29218|IMPA1_HUMAN	2	2	2	sp|P29218|IMPA1_HUMAN Inositol monophosphatase 1 OS=Homo sapiens OX=9606 GN=IMPA1 PE=1 SV=1	1	2	2	2	1	0	0	0	0	1	1	1	0	0	0	0	1	1	1	0	0	0	0	1	1	7.6	7.6	7.6	30.188	277	277	0	1.8585	2.4012	1.1094	12.639	3	0	Plateau	2.5282
625	sp|P29317|EPHA2_HUMAN;sp|P54762|EPHB1_HUMAN;sp|P54764|EPHA4_HUMAN;sp|P54760|EPHB4_HUMAN;sp|Q15375|EPHA7_HUMAN;sp|P54753|EPHB3_HUMAN;sp|Q9UF33|EPHA6_HUMAN;sp|P29323|EPHB2_HUMAN	sp|P29317|EPHA2_HUMAN	8;1;1;1;1;1;1;1	8;1;1;1;1;1;1;1	8;1;1;1;1;1;1;1	sp|P29317|EPHA2_HUMAN Ephrin type-A receptor 2 OS=Homo sapiens OX=9606 GN=EPHA2 PE=1 SV=2	8	8	8	8	6	2	3	5	3	5	3	6	2	3	5	3	5	3	6	2	3	5	3	5	3	10.2	10.2	10.2	108.27	976	976;984;986;987;998;998;1036;1055	0	21.98	3.0515	1.2121	22.826	25	11	Leave out requantified	2.8461	2.6971	2.7264	2.0529
626	sp|P29401|TKT_HUMAN	sp|P29401|TKT_HUMAN	17	17	17	sp|P29401|TKT_HUMAN Transketolase OS=Homo sapiens OX=9606 GN=TKT PE=1 SV=3	1	17	17	17	11	12	10	12	12	11	11	11	12	10	12	12	11	11	11	12	10	12	12	11	11	40.3	40.3	40.3	67.877	623	623	0	106.97	2.5679	1.2996	43.344	82	18	Leave out requantified	2.6078	3.0048	2.994	2.5163
627	sp|P29590|PML_HUMAN	sp|P29590|PML_HUMAN	9	9	9	sp|P29590|PML_HUMAN Protein PML OS=Homo sapiens OX=9606 GN=PML PE=1 SV=3	1	9	9	9	3	4	3	3	1	5	0	3	4	3	3	1	5	0	3	4	3	3	1	5	0	14.7	14.7	14.7	97.55	882	882	0	45.274	2.0792	1.0618	7.6111	17	11	Leave out requantified	1.4174	1.8552	2.0425	1.9757
628	sp|P29692|EF1D_HUMAN	sp|P29692|EF1D_HUMAN	15	15	13	sp|P29692|EF1D_HUMAN Elongation factor 1-delta OS=Homo sapiens OX=9606 GN=EEF1D PE=1 SV=5	1	15	15	13	12	11	10	12	11	12	10	12	11	10	12	11	12	10	11	9	10	11	9	10	8	56.2	56.2	53	31.121	281	281	0	146.81	2.0059	1.0584	59.574	104	22	Leave out requantified	2.221	2.0994	2.3705	2.0196
629	sp|P29992|GNA11_HUMAN;sp|O95837|GNA14_HUMAN;sp|P50148|GNAQ_HUMAN	sp|P29992|GNA11_HUMAN;sp|O95837|GNA14_HUMAN;sp|P50148|GNAQ_HUMAN	2;1;1	2;1;1	2;1;1	sp|P29992|GNA11_HUMAN Guanine nucleotide-binding protein subunit alpha-11 OS=Homo sapiens OX=9606 GN=GNA11 PE=1 SV=2;sp|O95837|GNA14_HUMAN Guanine nucleotide-binding protein subunit alpha-14 OS=Homo sapiens OX=9606 GN=GNA14 PE=1 SV=1;sp|P50148|GNAQ_HUMAN G	3	2	2	2	0	1	1	1	1	1	1	0	1	1	1	1	1	1	0	1	1	1	1	1	1	7	7	7	42.123	359	359;355;359	0	1.8273	1.1863	0.412	83.14	6	3	Median		3.4343	1.7252	0.78242
630	sp|P30040|ERP29_HUMAN	sp|P30040|ERP29_HUMAN	8	8	8	sp|P30040|ERP29_HUMAN Endoplasmic reticulum resident protein 29 OS=Homo sapiens OX=9606 GN=ERP29 PE=1 SV=4	1	8	8	8	7	6	6	5	5	5	4	7	6	6	5	5	5	4	7	6	6	5	5	5	4	42.9	42.9	42.9	28.993	261	261	0	24.856	2.1712	0.90039	46.392	39	18	Leave out requantified	2.2552	2.2528	2.262	2.1747
631	sp|P30041|PRDX6_HUMAN	sp|P30041|PRDX6_HUMAN	12	12	12	sp|P30041|PRDX6_HUMAN Peroxiredoxin-6 OS=Homo sapiens OX=9606 GN=PRDX6 PE=1 SV=3	1	12	12	12	9	8	6	8	8	9	9	9	8	6	8	8	9	9	9	8	6	8	8	9	9	62.9	62.9	62.9	25.035	224	224	0	102.75	2.5576	1.033	35.149	67	13	Leave out requantified	2.7468	2.2831	2.7179	2.644
632	sp|P30043|BLVRB_HUMAN	sp|P30043|BLVRB_HUMAN	5	5	5	sp|P30043|BLVRB_HUMAN Flavin reductase (NADPH) OS=Homo sapiens OX=9606 GN=BLVRB PE=1 SV=3	1	5	5	5	4	2	4	4	4	2	3	4	2	4	4	4	2	3	4	2	4	4	4	2	3	30.6	30.6	30.6	22.119	206	206	0	23.495	3.1694	1.4283	19.091	24	20	Leave out requantified	3.96	3.1488	1.0582	2.3117
633	sp|P30044|PRDX5_HUMAN	sp|P30044|PRDX5_HUMAN	2	2	2	sp|P30044|PRDX5_HUMAN Peroxiredoxin-5, mitochondrial OS=Homo sapiens OX=9606 GN=PRDX5 PE=1 SV=4	1	2	2	2	1	2	2	2	2	2	1	1	2	2	2	2	2	1	1	2	2	2	2	2	1	10.3	10.3	10.3	22.086	214	214	0	2.8109	2.3036	1.0149	33.509	8	4	Leave out requantified		2.047	2.1619	1.9073
634	sp|P30046|DOPD_HUMAN;sp|A6NHG4|DDTL_HUMAN	sp|P30046|DOPD_HUMAN;sp|A6NHG4|DDTL_HUMAN	5;3	5;3	5;3	sp|P30046|DOPD_HUMAN D-dopachrome decarboxylase OS=Homo sapiens OX=9606 GN=DDT PE=1 SV=3;sp|A6NHG4|DDTL_HUMAN D-dopachrome decarboxylase-like protein OS=Homo sapiens OX=9606 GN=DDTL PE=2 SV=1	2	5	5	5	2	1	2	2	2	3	1	2	1	2	2	2	3	1	2	1	2	2	2	3	1	39.8	39.8	39.8	12.712	118	118;134	0	10.806	1.7924	0.65106	59.508	8	6	Median	1.8415	2.8161		1.7458
635	sp|P30048|PRDX3_HUMAN	sp|P30048|PRDX3_HUMAN	13	13	13	sp|P30048|PRDX3_HUMAN Thioredoxin-dependent peroxide reductase, mitochondrial OS=Homo sapiens OX=9606 GN=PRDX3 PE=1 SV=3	1	13	13	13	8	10	11	12	10	9	11	8	10	11	12	10	9	11	8	10	11	12	10	9	11	55.9	55.9	55.9	27.692	256	256	0	100.69	2.5627	1.0945	37.966	92	26	Leave out requantified	2.7895	2.5296	2.8587	2.6357
636	sp|P30050|RL12_HUMAN	sp|P30050|RL12_HUMAN	8	8	8	sp|P30050|RL12_HUMAN 60S ribosomal protein L12 OS=Homo sapiens OX=9606 GN=RPL12 PE=1 SV=1	1	8	8	8	6	5	5	6	4	6	7	6	5	5	6	4	6	7	6	5	5	6	4	6	7	64.2	64.2	64.2	17.818	165	165	0	70.978	4.0366	1.6211	20.734	38	8	Leave out requantified	3.8036	4.6041	4.5905	4.4487
637	sp|P30084|ECHM_HUMAN	sp|P30084|ECHM_HUMAN	6	6	6	sp|P30084|ECHM_HUMAN Enoyl-CoA hydratase, mitochondrial OS=Homo sapiens OX=9606 GN=ECHS1 PE=1 SV=4	1	6	6	6	5	4	4	5	4	4	4	5	4	4	5	4	4	4	5	4	4	5	4	4	4	30	30	30	31.387	290	290	0	53.39	2.2044	0.92344	22.551	40	16	Leave out requantified	2.4871	2.2536	2.4469	2.0128
638	sp|P30085|KCY_HUMAN	sp|P30085|KCY_HUMAN	6	6	6	sp|P30085|KCY_HUMAN UMP-CMP kinase OS=Homo sapiens OX=9606 GN=CMPK1 PE=1 SV=3	1	6	6	6	2	3	3	4	3	4	3	2	3	3	4	3	4	3	2	3	3	4	3	4	3	34.7	34.7	34.7	22.222	196	196	0	17.227	2.2211	1.01	8.3908	20	6	Leave out requantified	2.3157	2.9462	2.4155	2.3288
639	sp|P30086|PEBP1_HUMAN	sp|P30086|PEBP1_HUMAN	10	10	10	sp|P30086|PEBP1_HUMAN Phosphatidylethanolamine-binding protein 1 OS=Homo sapiens OX=9606 GN=PEBP1 PE=1 SV=3	1	10	10	10	7	10	8	8	7	8	7	7	10	8	8	7	8	7	7	10	8	8	7	8	7	73.3	73.3	73.3	21.057	187	187	0	119.92	2.9307	1.0939	47.997	62	20	Leave out requantified	3.1379	2.6096	3.2407	3.265
640	sp|P30101|PDIA3_HUMAN	sp|P30101|PDIA3_HUMAN	37	37	37	sp|P30101|PDIA3_HUMAN Protein disulfide-isomerase A3 OS=Homo sapiens OX=9606 GN=PDIA3 PE=1 SV=4	1	37	37	37	28	32	31	30	31	30	29	28	32	31	30	31	30	29	28	32	31	30	31	30	29	67.1	67.1	67.1	56.782	505	505	0	323.31	2.3179	1.0663	32.288	254	57	Leave out requantified	2.3264	2.3185	2.7375	2.2934
641	sp|P30153|2AAA_HUMAN;sp|P30154|2AAB_HUMAN	sp|P30153|2AAA_HUMAN	27;5	27;5	27;5	sp|P30153|2AAA_HUMAN Serine/threonine-protein phosphatase 2A 65 kDa regulatory subunit A alpha isoform OS=Homo sapiens OX=9606 GN=PPP2R1A PE=1 SV=4	2	27	27	27	18	16	16	16	16	19	18	18	16	16	16	16	19	18	18	16	16	16	16	19	18	54.8	54.8	54.8	65.308	589	589;601	0	152.61	2.3039	1.0496	23.351	136	48	Leave out requantified	2.7167	2.5547	2.9599	2.7548
642	sp|P30408|T4S1_HUMAN	sp|P30408|T4S1_HUMAN	1	1	1	sp|P30408|T4S1_HUMAN Transmembrane 4 L6 family member 1 OS=Homo sapiens OX=9606 GN=TM4SF1 PE=1 SV=1	1	1	1	1	1	1	1	1	1	1	1	1	1	1	1	1	1	1	1	1	1	1	1	1	1	4.5	4.5	4.5	21.632	202	202	0	2.2433	1.7143	0.79623	24.709	12	0	Median	1.8485	1.9731	1.6902	1.7748
643	sp|P30419|NMT1_HUMAN	sp|P30419|NMT1_HUMAN	7	7	5	sp|P30419|NMT1_HUMAN Glycylpeptide N-tetradecanoyltransferase 1 OS=Homo sapiens OX=9606 GN=NMT1 PE=1 SV=2	1	7	7	5	3	2	5	1	5	3	3	3	2	5	1	5	3	3	2	2	4	1	3	2	2	21.2	21.2	14.5	56.806	496	496	0	24.885	5.6341	2.4322	93.034	17	15	Linear	3.7899	0.53743	0.97776	2.8449
644	sp|P30519|HMOX2_HUMAN	sp|P30519|HMOX2_HUMAN	3	3	3	sp|P30519|HMOX2_HUMAN Heme oxygenase 2 OS=Homo sapiens OX=9606 GN=HMOX2 PE=1 SV=2	1	3	3	3	1	2	1	2	2	1	1	1	2	1	2	2	1	1	1	2	1	2	2	1	1	17.7	17.7	17.7	36.032	316	316	0	25.409	1.0544	0.46165	95.599	8	7	Median	1.8669	0.81946	0.86437	0.19504
645	sp|P30520|PURA2_HUMAN	sp|P30520|PURA2_HUMAN	13	13	13	sp|P30520|PURA2_HUMAN Adenylosuccinate synthetase isozyme 2 OS=Homo sapiens OX=9606 GN=ADSS2 PE=1 SV=3	1	13	13	13	10	9	8	8	7	8	5	10	9	8	8	7	8	5	10	9	8	8	7	8	5	38.2	38.2	38.2	50.097	456	456	0	63.949	2.5922	1.0632	46.494	62	13	Leave out requantified	2.8697	2.9706	3.1093	2.9226
647	sp|P30533|AMRP_HUMAN	sp|P30533|AMRP_HUMAN	2	2	2	sp|P30533|AMRP_HUMAN Alpha-2-macroglobulin receptor-associated protein OS=Homo sapiens OX=9606 GN=LRPAP1 PE=1 SV=1	1	2	2	2	1	1	1	2	1	1	0	1	1	1	2	1	1	0	1	1	1	2	1	1	0	5.3	5.3	5.3	41.465	357	357	0.0055432	1.1899	0.49233	0.20249	72.085	7	7	Median	0.65503	0.45164	0.36593	1.0542
648	sp|P30566|PUR8_HUMAN	sp|P30566|PUR8_HUMAN	11	11	11	sp|P30566|PUR8_HUMAN Adenylosuccinate lyase OS=Homo sapiens OX=9606 GN=ADSL PE=1 SV=2	1	11	11	11	5	8	6	8	7	7	9	5	8	6	8	7	7	9	5	8	6	8	7	7	9	40.7	40.7	40.7	54.889	484	484	0	66.561	2.2299	1.0317	40.53	51	23	Leave out requantified	4.1227	2.5057	3.6211	2.8122
649	sp|P30622|CLIP1_HUMAN	sp|P30622|CLIP1_HUMAN	2	2	2	sp|P30622|CLIP1_HUMAN CAP-Gly domain-containing linker protein 1 OS=Homo sapiens OX=9606 GN=CLIP1 PE=1 SV=2	1	2	2	2	1	0	0	1	0	1	0	1	0	0	1	0	1	0	1	0	0	1	0	1	0	2.3	2.3	2.3	162.24	1438	1438	0	5.0008	1.42	0.75225	127.95	3	3	Plateau	0.68427			0.45117
651	sp|P30740|ILEU_HUMAN	sp|P30740|ILEU_HUMAN	7	6	6	sp|P30740|ILEU_HUMAN Leukocyte elastase inhibitor OS=Homo sapiens OX=9606 GN=SERPINB1 PE=1 SV=1	1	7	6	6	1	4	3	2	3	4	5	1	3	3	2	3	4	5	1	3	3	2	3	4	5	23.2	20.6	20.6	42.741	379	379	0	17.318	3.0086	1.2806	25.293	20	8	Leave out requantified	2.7387	3.1148	3.5923	2.902
653	sp|P30837|AL1B1_HUMAN	sp|P30837|AL1B1_HUMAN	7	6	6	sp|P30837|AL1B1_HUMAN Aldehyde dehydrogenase X, mitochondrial OS=Homo sapiens OX=9606 GN=ALDH1B1 PE=1 SV=3	1	7	6	6	2	3	2	3	4	1	1	1	3	1	3	4	0	1	1	3	1	3	4	0	1	20.3	18.8	18.8	57.206	517	517	0	34.476	2.5318	1.3057	25.928	10	4	Leave out requantified	2.3499	2.3513	2.3006	2.6306
654	sp|P31040|SDHA_HUMAN	sp|P31040|SDHA_HUMAN	13	13	13	sp|P31040|SDHA_HUMAN Succinate dehydrogenase [ubiquinone] flavoprotein subunit, mitochondrial OS=Homo sapiens OX=9606 GN=SDHA PE=1 SV=2	1	13	13	13	13	9	11	8	10	8	3	13	9	11	8	10	8	3	13	9	11	8	10	8	3	28	28	28	72.691	664	664	0	69.964	2.8531	1.1403	35.492	58	36	Leave out requantified	2.8754	2.4316	2.3675	2.8531
655	sp|P31150|GDIA_HUMAN	sp|P31150|GDIA_HUMAN	22	13	13	sp|P31150|GDIA_HUMAN Rab GDP dissociation inhibitor alpha OS=Homo sapiens OX=9606 GN=GDI1 PE=1 SV=2	1	22	13	13	14	15	14	13	12	17	12	6	8	6	5	5	9	5	6	8	6	5	5	9	5	69.8	46.8	46.8	50.582	447	447	0	76.087	1.9211	0.76198	27.771	43	11	Leave out requantified	1.896	2.1185	2.0206	1.6391
657	sp|P31153|METK2_HUMAN;sp|Q00266|METK1_HUMAN	sp|P31153|METK2_HUMAN	7;1	7;1	7;1	sp|P31153|METK2_HUMAN S-adenosylmethionine synthase isoform type-2 OS=Homo sapiens OX=9606 GN=MAT2A PE=1 SV=1	2	7	7	7	5	5	6	6	5	6	5	5	5	6	6	5	6	5	5	5	6	6	5	6	5	21	21	21	43.66	395	395;395	0	27.858	2.8613	1.0899	34.341	43	19	Leave out requantified	2.3553	3.1064	2.8604	2.9162
659	sp|P31689|DNJA1_HUMAN	sp|P31689|DNJA1_HUMAN	6	6	6	sp|P31689|DNJA1_HUMAN DnaJ homolog subfamily A member 1 OS=Homo sapiens OX=9606 GN=DNAJA1 PE=1 SV=2	1	6	6	6	5	6	5	3	5	6	6	5	6	5	3	5	6	6	5	6	5	3	5	6	6	21.4	21.4	21.4	44.868	397	397	0	48.365	3.6659	1.4946	37.371	39	17	Leave out requantified	4.1782	3.8575	3.9316	2.7711
660	sp|P31751|AKT2_HUMAN	sp|P31751|AKT2_HUMAN	2	2	1	sp|P31751|AKT2_HUMAN RAC-beta serine/threonine-protein kinase OS=Homo sapiens OX=9606 GN=AKT2 PE=1 SV=2	1	2	2	1	1	0	1	0	0	1	0	1	0	1	0	0	1	0	0	0	1	0	0	0	0	5	5	3.3	55.768	481	481	0.0011669	1.596	1.4984	0.48141	58.268	3	2	Plateau	2.3676		0.94829
661	sp|P31930|QCR1_HUMAN	sp|P31930|QCR1_HUMAN	5	5	5	sp|P31930|QCR1_HUMAN Cytochrome b-c1 complex subunit 1, mitochondrial OS=Homo sapiens OX=9606 GN=UQCRC1 PE=1 SV=3	1	5	5	5	1	2	2	2	1	2	5	1	2	2	2	1	2	5	1	2	2	2	1	2	5	19.6	19.6	19.6	52.645	480	480	0	16.064	2.4882	1.1315	9.6704	15	3	Leave out requantified	2.1437	3.2561	2.6024	2.148
663	sp|P31939|PUR9_HUMAN	sp|P31939|PUR9_HUMAN	15	15	15	sp|P31939|PUR9_HUMAN Bifunctional purine biosynthesis protein ATIC OS=Homo sapiens OX=9606 GN=ATIC PE=1 SV=3	1	15	15	15	8	9	4	7	5	5	3	8	9	4	7	5	5	3	8	9	4	7	5	5	3	31.6	31.6	31.6	64.615	592	592	0	44.078	4.2438	1.7629	40.415	38	29	Leave out requantified	2.6605	2.475	2.1174	2.8425
664	sp|P31942|HNRH3_HUMAN	sp|P31942|HNRH3_HUMAN	7	6	6	sp|P31942|HNRH3_HUMAN Heterogeneous nuclear ribonucleoprotein H3 OS=Homo sapiens OX=9606 GN=HNRNPH3 PE=1 SV=2	1	7	6	6	2	4	2	3	5	1	3	2	4	2	3	5	1	2	2	4	2	3	5	1	2	26	23.7	23.7	36.926	346	346	0	27.184	3.9404	1.7726	51.048	18	14	Leave out requantified	3.5733	3.6033	1.5832	2.0888
665	sp|P31943|HNRH1_HUMAN	sp|P31943|HNRH1_HUMAN	16	16	8	sp|P31943|HNRH1_HUMAN Heterogeneous nuclear ribonucleoprotein H OS=Homo sapiens OX=9606 GN=HNRNPH1 PE=1 SV=4	1	16	16	8	10	10	11	10	11	10	13	10	10	11	10	11	10	13	4	3	6	5	6	5	6	49.4	49.4	28.1	49.229	449	449	0	176.79	4.7823	1.7584	32.364	101	29	Leave out requantified	4.7819	5.3922	5.0717	5.1093
666	sp|P31946|1433B_HUMAN	sp|P31946|1433B_HUMAN	20	14	12	sp|P31946|1433B_HUMAN 14-3-3 protein beta/alpha OS=Homo sapiens OX=9606 GN=YWHAB PE=1 SV=3	1	20	14	12	17	16	20	19	15	16	14	11	10	14	13	10	10	9	9	8	12	11	8	8	7	72	58.1	51.6	28.082	246	246	0	293.02	1.8328	0.81501	28.807	102	21	Leave out requantified	1.8585	1.7865	2.0414	1.7899
667	sp|P31947|1433S_HUMAN	sp|P31947|1433S_HUMAN	11	7	7	sp|P31947|1433S_HUMAN 14-3-3 protein sigma OS=Homo sapiens OX=9606 GN=SFN PE=1 SV=1	1	11	7	7	8	9	11	8	8	11	8	4	5	7	4	5	7	5	4	5	7	4	5	7	5	47.2	34.3	34.3	27.774	248	248	0	18.179	1.8776	0.94339	25.345	44	4	Leave out requantified	1.8101	1.7719	2.1071	1.8721
668	sp|P31948|STIP1_HUMAN	sp|P31948|STIP1_HUMAN	32	32	32	sp|P31948|STIP1_HUMAN Stress-induced-phosphoprotein 1 OS=Homo sapiens OX=9606 GN=STIP1 PE=1 SV=1	1	32	32	32	21	22	21	21	24	20	23	21	22	21	21	24	20	23	21	22	21	21	24	20	23	51.9	51.9	51.9	62.639	543	543	0	175.48	1.8582	0.83675	29.288	166	19	Leave out requantified	2.0479	1.9941	1.9542	2.0174
669	sp|P31949|S10AB_HUMAN	sp|P31949|S10AB_HUMAN	5	5	5	sp|P31949|S10AB_HUMAN Protein S100-A11 OS=Homo sapiens OX=9606 GN=S100A11 PE=1 SV=2	1	5	5	5	2	3	4	3	2	2	3	2	3	4	3	2	2	3	2	3	4	3	2	2	3	49.5	49.5	49.5	11.74	105	105	0	30.32	1.9699	0.79535	33.109	19	1	Leave out requantified	1.8281	1.7069	1.8843	2.355
671	sp|P32119|PRDX2_HUMAN	sp|P32119|PRDX2_HUMAN	13	12	12	sp|P32119|PRDX2_HUMAN Peroxiredoxin-2 OS=Homo sapiens OX=9606 GN=PRDX2 PE=1 SV=5	1	13	12	12	11	12	11	11	11	11	10	10	11	10	10	10	10	9	10	11	10	10	10	10	9	53	47.5	47.5	21.892	198	198	0	74.763	2.3273	0.92839	20.02	75	5	Leave out requantified	2.3831	2.4524	2.5098	2.4925
672	sp|P32321|DCTD_HUMAN	sp|P32321|DCTD_HUMAN	4	4	4	sp|P32321|DCTD_HUMAN Deoxycytidylate deaminase OS=Homo sapiens OX=9606 GN=DCTD PE=1 SV=2	1	4	4	4	2	3	4	1	4	2	1	2	3	4	1	4	2	1	2	3	4	1	4	2	1	29.2	29.2	29.2	20.016	178	178	0	5.8539	1.9326	1.0778	7.7183	15	4	Leave out requantified	2.0319	2.2226	2.1456	1.9396
673	sp|P32455|GBP1_HUMAN;sp|Q9H0R5|GBP3_HUMAN	sp|P32455|GBP1_HUMAN;sp|Q9H0R5|GBP3_HUMAN	2;1	2;1	2;1	sp|P32455|GBP1_HUMAN Guanylate-binding protein 1 OS=Homo sapiens OX=9606 GN=GBP1 PE=1 SV=2;sp|Q9H0R5|GBP3_HUMAN Guanylate-binding protein 3 OS=Homo sapiens OX=9606 GN=GBP3 PE=1 SV=3	2	2	2	2	1	2	1	1	2	1	0	1	2	1	1	2	1	0	1	2	1	1	2	1	0	3.9	3.9	3.9	67.93	592	592;595	0	2.9107	0.50754	0.2465	64.156	3	2	Plateau		0.14946
674	sp|P32969|RL9_HUMAN	sp|P32969|RL9_HUMAN	8	8	8	sp|P32969|RL9_HUMAN 60S ribosomal protein L9 OS=Homo sapiens OX=9606 GN=RPL9 PE=1 SV=1	1	8	8	8	6	5	6	7	4	8	4	6	5	6	7	4	8	4	6	5	6	7	4	8	4	47.9	47.9	47.9	21.863	192	192	0	78.317	6.0584	2.8095	29.692	53	29	Leave out requantified	6.4437	6.399	3.9415	7.0526
675	sp|P33121|ACSL1_HUMAN	sp|P33121|ACSL1_HUMAN	4	4	4	sp|P33121|ACSL1_HUMAN Long-chain-fatty-acid--CoA ligase 1 OS=Homo sapiens OX=9606 GN=ACSL1 PE=1 SV=1	1	4	4	4	1	1	3	1	2	1	1	1	1	3	1	2	1	1	1	1	3	1	2	1	1	6.2	6.2	6.2	77.942	698	698	0.00059559	1.7705	1.247	0.4996	46.414	9	8	Median	1.5459	1.5251	0.75976	0.96244
676	sp|P33176|KINH_HUMAN;sp|O60282|KIF5C_HUMAN;sp|Q12840|KIF5A_HUMAN	sp|P33176|KINH_HUMAN	24;6;4	24;6;4	24;6;4	sp|P33176|KINH_HUMAN Kinesin-1 heavy chain OS=Homo sapiens OX=9606 GN=KIF5B PE=1 SV=1	3	24	24	24	13	14	11	11	14	18	12	13	14	11	11	14	18	12	13	14	11	11	14	18	12	32.2	32.2	32.2	109.68	963	963;957;1032	0	181.03	3.859	1.6842	23.833	88	51	Leave out requantified	3.6806	4.5148	5.4895	3.5914
678	sp|P33947|ERD22_HUMAN;sp|O43731|ERD23_HUMAN	sp|P33947|ERD22_HUMAN	3;1	3;1	2;1	sp|P33947|ERD22_HUMAN ER lumen protein-retaining receptor 2 OS=Homo sapiens OX=9606 GN=KDELR2 PE=1 SV=1	2	3	3	2	3	0	2	0	1	1	1	3	0	2	0	1	1	1	2	0	1	0	1	0	1	18.9	18.9	13.7	24.422	212	212;214	0	14.555	2.3653	0.95234	22.858	7	5	Median	2.2929		2.9814
679	sp|P33991|MCM4_HUMAN	sp|P33991|MCM4_HUMAN	7	7	7	sp|P33991|MCM4_HUMAN DNA replication licensing factor MCM4 OS=Homo sapiens OX=9606 GN=MCM4 PE=1 SV=5	1	7	7	7	4	2	3	1	4	1	3	4	2	3	1	4	1	3	4	2	3	1	4	1	3	9.6	9.6	9.6	96.557	863	863	0	11.681	1.0477	0.49884	86.081	15	13	Median	0.76046	2.9604	0.90406	1.0477
680	sp|P33992|MCM5_HUMAN	sp|P33992|MCM5_HUMAN	6	6	6	sp|P33992|MCM5_HUMAN DNA replication licensing factor MCM5 OS=Homo sapiens OX=9606 GN=MCM5 PE=1 SV=5	1	6	6	6	2	2	2	2	3	2	2	2	2	2	2	3	2	2	2	2	2	2	3	2	2	8.9	8.9	8.9	82.285	734	734	0	10.232	4.3024	1.8143	17.728	15	10	Leave out requantified	3.2973	4.5654	4.807	2.6366
681	sp|P33993|MCM7_HUMAN	sp|P33993|MCM7_HUMAN	8	8	8	sp|P33993|MCM7_HUMAN DNA replication licensing factor MCM7 OS=Homo sapiens OX=9606 GN=MCM7 PE=1 SV=4	1	8	8	8	2	4	3	2	3	4	3	2	4	3	2	3	4	3	2	4	3	2	3	4	3	14.9	14.9	14.9	81.307	719	719	0	19.887	1.6571	0.85124	86.212	18	16	Median	1.4098	3.0679	4.5295	3.1497
682	sp|P34810|CD68_HUMAN	sp|P34810|CD68_HUMAN	1	1	1	sp|P34810|CD68_HUMAN Macrosialin OS=Homo sapiens OX=9606 GN=CD68 PE=1 SV=2	1	1	1	1	0	0	1	0	1	1	1	0	0	1	0	1	1	1	0	0	1	0	1	1	1	6.2	6.2	6.2	37.408	354	354	0	2.621	1.0871	0.43373	9.2564	4	1	Median			1.2111
683	sp|P34896|GLYC_HUMAN	sp|P34896|GLYC_HUMAN	3	2	2	sp|P34896|GLYC_HUMAN Serine hydroxymethyltransferase, cytosolic OS=Homo sapiens OX=9606 GN=SHMT1 PE=1 SV=1	1	3	2	2	1	0	3	2	1	2	2	0	0	2	2	0	1	2	0	0	2	2	0	1	2	8.7	5.8	5.8	53.082	483	483	0	5.7881	0.95253	0.40842	97.712	6	4	Median			0.61762	1.4888
684	sp|P34897|GLYM_HUMAN	sp|P34897|GLYM_HUMAN	17	17	16	sp|P34897|GLYM_HUMAN Serine hydroxymethyltransferase, mitochondrial OS=Homo sapiens OX=9606 GN=SHMT2 PE=1 SV=3	1	17	17	16	8	10	11	11	8	9	10	8	10	11	11	8	9	10	7	10	10	11	7	8	10	44.4	44.4	41.7	55.992	504	504	0	93.585	3.774	1.8367	48.677	70	39	Leave out requantified	4.8548	4.9488	4.8757	4.7821
685	sp|P34932|HSP74_HUMAN	sp|P34932|HSP74_HUMAN	46	46	43	sp|P34932|HSP74_HUMAN Heat shock 70 kDa protein 4 OS=Homo sapiens OX=9606 GN=HSPA4 PE=1 SV=4	1	46	46	43	31	31	31	33	37	36	31	31	31	31	33	37	36	31	29	29	28	31	34	33	29	71.2	71.2	68.6	94.33	840	840	0	323.31	1.5293	0.68684	31.654	269	41	Leave out requantified	1.6242	1.6864	1.7729	1.6876
686	sp|P35221|CTNA1_HUMAN	sp|P35221|CTNA1_HUMAN	17	17	14	sp|P35221|CTNA1_HUMAN Catenin alpha-1 OS=Homo sapiens OX=9606 GN=CTNNA1 PE=1 SV=1	1	17	17	14	9	9	12	11	7	9	8	9	9	12	11	7	9	8	7	8	10	8	5	6	6	32.3	32.3	27.5	100.07	906	906	0	118.88	2.2661	0.94493	21.547	63	20	Leave out requantified	2.5196	2.2347	2.7143	2.5846
687	sp|P35222|CTNB1_HUMAN	sp|P35222|CTNB1_HUMAN	2	2	2	sp|P35222|CTNB1_HUMAN Catenin beta-1 OS=Homo sapiens OX=9606 GN=CTNNB1 PE=1 SV=1	1	2	2	2	0	1	1	1	1	1	0	0	1	1	1	1	1	0	0	1	1	1	1	1	0	2.8	2.8	2.8	85.496	781	781	0	2.3534	2.4678	1.1594	11.229	3	2	Plateau		2.4678		2.3702
688	sp|P35232|PHB_HUMAN	sp|P35232|PHB_HUMAN	13	13	13	sp|P35232|PHB_HUMAN Prohibitin OS=Homo sapiens OX=9606 GN=PHB PE=1 SV=1	1	13	13	13	9	10	6	10	12	9	8	9	10	6	10	12	9	8	9	10	6	10	12	9	8	61.8	61.8	61.8	29.804	272	272	0	101.67	3.0879	1.1218	34.158	69	13	Leave out requantified	2.8872	3.1592	3.1866	3.225
689	sp|P35237|SPB6_HUMAN	sp|P35237|SPB6_HUMAN	12	12	11	sp|P35237|SPB6_HUMAN Serpin B6 OS=Homo sapiens OX=9606 GN=SERPINB6 PE=1 SV=3	1	12	12	11	7	10	4	8	6	7	7	7	10	4	8	6	7	7	6	9	4	8	5	6	6	41.2	41.2	39.1	42.621	376	376	0	98.744	2.8063	0.99367	26.139	48	18	Leave out requantified	2.3359	2.3298	2.1325	2.0193
691	sp|P35268|RL22_HUMAN	sp|P35268|RL22_HUMAN	4	4	4	sp|P35268|RL22_HUMAN 60S ribosomal protein L22 OS=Homo sapiens OX=9606 GN=RPL22 PE=1 SV=2	1	4	4	4	3	4	4	4	3	4	3	3	4	4	4	3	4	3	3	4	4	4	3	4	3	50.8	50.8	50.8	14.787	128	128	0	44.065	4.7092	1.9326	11.404	21	10	Leave out requantified	3.8063	4.3189	4.8515	3.7575
693	sp|P35270|SPRE_HUMAN	sp|P35270|SPRE_HUMAN	1	1	1	sp|P35270|SPRE_HUMAN Sepiapterin reductase OS=Homo sapiens OX=9606 GN=SPR PE=1 SV=1	1	1	1	1	1	1	1	1	1	1	0	1	1	1	1	1	1	0	1	1	1	1	1	1	0	5.7	5.7	5.7	28.048	261	261	0	6.8952	2.9785	1.1651	8.9346	6	0	Median	2.9283	3.0637	3.0296	3.0349
695	sp|P35579|MYH9_HUMAN;sp|P35749|MYH11_HUMAN	sp|P35579|MYH9_HUMAN	100;13	100;13	81;2	sp|P35579|MYH9_HUMAN Myosin-9 OS=Homo sapiens OX=9606 GN=MYH9 PE=1 SV=4	2	100	100	81	56	59	58	52	56	46	54	56	59	58	52	56	46	54	44	46	50	44	44	38	44	55.6	55.6	47.4	226.53	1960	1960;1972	0	323.31	4.5345	2.1413	37.347	391	220	Leave out requantified	5.3759	5.1227	7.1782	5.1428
697	sp|P35606|COPB2_HUMAN	sp|P35606|COPB2_HUMAN	22	22	22	sp|P35606|COPB2_HUMAN Coatomer subunit beta OS=Homo sapiens OX=9606 GN=COPB2 PE=1 SV=2	1	22	22	22	13	11	13	11	13	13	9	13	11	13	11	13	13	9	13	11	13	11	13	13	9	34.3	34.3	34.3	102.49	906	906	0	124.22	4.492	1.7706	25.041	81	38	Leave out requantified	5.1505	5.1198	5.0779	5.5131
698	sp|P35610|SOAT1_HUMAN	sp|P35610|SOAT1_HUMAN	3	3	3	sp|P35610|SOAT1_HUMAN Sterol O-acyltransferase 1 OS=Homo sapiens OX=9606 GN=SOAT1 PE=1 SV=3	1	3	3	3	2	3	1	1	2	2	2	2	3	1	1	2	2	2	2	3	1	1	2	2	2	7.1	7.1	7.1	64.734	550	550	0	8.8565	3.5673	1.8328	21.939	13	5	Leave out requantified	3.3726	2.962	4.095	3.3027
699	sp|P35611|ADDA_HUMAN	sp|P35611|ADDA_HUMAN	3	3	3	sp|P35611|ADDA_HUMAN Alpha-adducin OS=Homo sapiens OX=9606 GN=ADD1 PE=1 SV=2	1	3	3	3	1	1	2	2	2	1	0	1	1	2	2	2	1	0	1	1	2	2	2	1	0	4.7	4.7	4.7	80.954	737	737	0	6.9619	1.9403	0.42748	38.461	9	7	Plateau	1.3703	1.9905	1.3708	0.74199
700	sp|P35613|BASI_HUMAN	sp|P35613|BASI_HUMAN	7	7	7	sp|P35613|BASI_HUMAN Basigin OS=Homo sapiens OX=9606 GN=BSG PE=1 SV=2	1	7	7	7	7	7	6	6	5	5	6	7	7	6	6	5	5	6	7	7	6	6	5	5	6	25.7	25.7	25.7	42.2	385	385	0	25.82	1.4881	0.68361	32.515	53	12	Leave out requantified	1.4645	1.4606	1.541	1.4849
701	sp|P35637|FUS_HUMAN	sp|P35637|FUS_HUMAN	3	3	2	sp|P35637|FUS_HUMAN RNA-binding protein FUS OS=Homo sapiens OX=9606 GN=FUS PE=1 SV=1	1	3	3	2	1	3	2	3	3	3	2	1	3	2	3	3	3	2	1	2	1	2	2	2	1	9.1	9.1	9.1	53.425	526	526	0	20.774	3.5704	1.6097	35.72	11	5	Leave out requantified	4.7386	3.5704	3.3027	2.7311
702	sp|P35659|DEK_HUMAN	sp|P35659|DEK_HUMAN	7	7	7	sp|P35659|DEK_HUMAN Protein DEK OS=Homo sapiens OX=9606 GN=DEK PE=1 SV=1	1	7	7	7	4	3	3	2	3	4	3	4	3	3	2	3	4	3	4	3	3	2	3	4	3	19.7	19.7	19.7	42.674	375	375	0	13.281	2.2366	1.1005	64.593	19	11	Leave out requantified	1.7784	2.6625	2.5184	3.6781
703	sp|P35813|PPM1A_HUMAN;sp|O75688|PPM1B_HUMAN	sp|P35813|PPM1A_HUMAN;sp|O75688|PPM1B_HUMAN	2;1	2;1	2;1	sp|P35813|PPM1A_HUMAN Protein phosphatase 1A OS=Homo sapiens OX=9606 GN=PPM1A PE=1 SV=1;sp|O75688|PPM1B_HUMAN Protein phosphatase 1B OS=Homo sapiens OX=9606 GN=PPM1B PE=1 SV=1	2	2	2	2	2	1	1	0	0	1	1	2	1	1	0	0	1	1	2	1	1	0	0	1	1	6.3	6.3	6.3	42.447	382	382;479	0	3.312	1.983	0.9054	25.425	6	2	Median	1.3796	2.0745	2.4203
704	sp|P35998|PRS7_HUMAN	sp|P35998|PRS7_HUMAN	23	23	23	sp|P35998|PRS7_HUMAN 26S proteasome regulatory subunit 7 OS=Homo sapiens OX=9606 GN=PSMC2 PE=1 SV=3	1	23	23	23	9	13	12	11	11	15	11	9	13	12	11	11	15	11	9	13	12	11	11	15	11	58.7	58.7	58.7	48.633	433	433	0	127.64	3.4685	1.3739	47.392	84	17	Leave out requantified	3.4844	3.5861	3.8235	3.9585
705	sp|P36404|ARL2_HUMAN	sp|P36404|ARL2_HUMAN	1	1	1	sp|P36404|ARL2_HUMAN ADP-ribosylation factor-like protein 2 OS=Homo sapiens OX=9606 GN=ARL2 PE=1 SV=4	1	1	1	1	1	1	0	1	1	0	1	1	1	0	1	1	0	1	1	1	0	1	1	0	1	5.4	5.4	5.4	20.878	184	184	0.008644	1.047	1.916	0.74076	8.8695	5	5	Median	2.0048	1.916		1.5747
706	sp|P36405|ARL3_HUMAN	sp|P36405|ARL3_HUMAN	3	3	3	sp|P36405|ARL3_HUMAN ADP-ribosylation factor-like protein 3 OS=Homo sapiens OX=9606 GN=ARL3 PE=1 SV=2	1	3	3	3	2	2	2	2	1	3	2	2	2	2	2	1	3	2	2	2	2	2	1	3	2	22	22	22	20.455	182	182	0	4.1598	2.4058	1.0672	37.802	10	4	Leave out requantified	2.7972	3.8706	1.6978	4.0815
707	sp|P36406|TRI23_HUMAN	sp|P36406|TRI23_HUMAN	1	1	1	sp|P36406|TRI23_HUMAN E3 ubiquitin-protein ligase TRIM23 OS=Homo sapiens OX=9606 GN=TRIM23 PE=1 SV=1	1	1	1	1	1	1	0	1	1	1	1	1	1	0	1	1	1	1	1	1	0	1	1	1	1	1.7	1.7	1.7	64.066	574	574	0	4.642	3.8942	1.6473	28.405	6	2	Median	4.0383	3.0381		5.2483
708	sp|P36507|MP2K2_HUMAN	sp|P36507|MP2K2_HUMAN	9	9	5	sp|P36507|MP2K2_HUMAN Dual specificity mitogen-activated protein kinase kinase 2 OS=Homo sapiens OX=9606 GN=MAP2K2 PE=1 SV=1	1	9	9	5	7	5	8	6	6	5	7	7	5	8	6	6	5	7	4	2	5	3	3	3	4	30	30	18.5	44.424	400	400	0	46.446	3.3242	1.7257	33.882	50	24	Leave out requantified	4.3107	3.0762	3.3846	4.5781
709	sp|P36542|ATPG_HUMAN	sp|P36542|ATPG_HUMAN	3	3	3	sp|P36542|ATPG_HUMAN ATP synthase subunit gamma, mitochondrial OS=Homo sapiens OX=9606 GN=ATP5F1C PE=1 SV=1	1	3	3	3	1	1	3	1	1	0	1	1	1	3	1	1	0	1	1	1	3	1	1	0	1	11.4	11.4	11.4	32.996	298	298	0	5.0766	3.6209	1.5466	48.029	5	1	Median		3.6209	2.8066	4.275
710	sp|P36543|VATE1_HUMAN	sp|P36543|VATE1_HUMAN	2	2	2	sp|P36543|VATE1_HUMAN V-type proton ATPase subunit E 1 OS=Homo sapiens OX=9606 GN=ATP6V1E1 PE=1 SV=1	1	2	2	2	0	1	1	0	0	1	0	0	1	1	0	0	1	0	0	1	1	0	0	1	0	11.1	11.1	11.1	26.145	226	226	0	4.1886	2.8152	1.4292	83.547	3	0	Median		2.8152	0.90087
711	sp|P36551|HEM6_HUMAN	sp|P36551|HEM6_HUMAN	11	11	11	sp|P36551|HEM6_HUMAN Oxygen-dependent coproporphyrinogen-III oxidase, mitochondrial OS=Homo sapiens OX=9606 GN=CPOX PE=1 SV=3	1	11	11	11	10	10	8	7	10	7	8	10	10	8	7	10	7	8	10	10	8	7	10	7	8	29.5	29.5	29.5	50.151	454	454	0	69.633	2.6245	1.1113	63.175	66	12	Leave out requantified	2.8778	2.714	3.4872	3.4807
712	sp|P36578|RL4_HUMAN	sp|P36578|RL4_HUMAN	19	19	19	sp|P36578|RL4_HUMAN 60S ribosomal protein L4 OS=Homo sapiens OX=9606 GN=RPL4 PE=1 SV=5	1	19	19	19	17	13	13	12	9	10	8	17	13	13	12	9	10	8	17	13	13	12	9	10	8	41	41	41	47.697	427	427	0	62.28	6.8678	2.7396	28.205	85	43	Leave out requantified	7.1254	6.8332	7.8211	7.5372
713	sp|P36776|LONM_HUMAN	sp|P36776|LONM_HUMAN	10	10	10	sp|P36776|LONM_HUMAN Lon protease homolog, mitochondrial OS=Homo sapiens OX=9606 GN=LONP1 PE=1 SV=2	1	10	10	10	3	4	4	4	2	5	4	3	4	4	4	2	5	4	3	4	4	4	2	5	4	14	14	14	106.49	959	959	0	41.949	4.0171	1.8201	21.219	25	18	Leave out requantified	4.1032	2.936	6.5474	8.238
714	sp|P36871|PGM1_HUMAN	sp|P36871|PGM1_HUMAN	9	9	9	sp|P36871|PGM1_HUMAN Phosphoglucomutase-1 OS=Homo sapiens OX=9606 GN=PGM1 PE=1 SV=3	1	9	9	9	7	7	7	6	7	7	4	7	7	7	6	7	7	4	7	7	7	6	7	7	4	19.2	19.2	19.2	61.448	562	562	0	20.517	2.2701	1.0556	28.755	43	20	Leave out requantified	2.1856	2.2271	2.5215	2.795
715	sp|P36873|PP1G_HUMAN	sp|P36873|PP1G_HUMAN	15	2	2	sp|P36873|PP1G_HUMAN Serine/threonine-protein phosphatase PP1-gamma catalytic subunit OS=Homo sapiens OX=9606 GN=PPP1CC PE=1 SV=1	1	15	2	2	10	10	9	11	8	10	8	1	1	1	1	0	0	0	1	1	1	1	0	0	0	57.3	7.4	7.4	36.983	323	323	0	10.537	3.1891	1.4874	23.925	4	2	Median	3.5257	2.8846	5.6906	2.4528
716	sp|P36957|ODO2_HUMAN	sp|P36957|ODO2_HUMAN	10	10	10	sp|P36957|ODO2_HUMAN Dihydrolipoyllysine-residue succinyltransferase component of 2-oxoglutarate dehydrogenase complex, mitochondrial OS=Homo sapiens OX=9606 GN=DLST PE=1 SV=4	1	10	10	10	6	5	5	4	4	4	6	6	5	5	4	4	4	6	6	5	5	4	4	4	6	30.5	30.5	30.5	48.755	453	453	0	61.502	2.1457	0.92193	23.621	30	4	Leave out requantified	1.9983	2.251	2.2291	2.2144
717	sp|P37108|SRP14_HUMAN	sp|P37108|SRP14_HUMAN	2	2	2	sp|P37108|SRP14_HUMAN Signal recognition particle 14 kDa protein OS=Homo sapiens OX=9606 GN=SRP14 PE=1 SV=2	1	2	2	2	0	2	2	2	2	2	2	0	2	2	2	2	2	2	0	2	2	2	2	2	2	31.6	31.6	31.6	14.57	136	136	0	15.082	3.7206	1.3213	7.0503	6	0	Median		3.5663	4.3878	3.8815
718	sp|P37235|HPCL1_HUMAN;sp|P84074|HPCA_HUMAN;sp|P61601|NCALD_HUMAN	sp|P37235|HPCL1_HUMAN	9;4;3	9;4;3	9;4;3	sp|P37235|HPCL1_HUMAN Hippocalcin-like protein 1 OS=Homo sapiens OX=9606 GN=HPCAL1 PE=1 SV=3	3	9	9	9	5	4	6	7	6	8	4	5	4	6	7	6	8	4	5	4	6	7	6	8	4	54.4	54.4	54.4	22.313	193	193;193;193	0	36.403	1.6788	0.70304	24.643	37	5	Leave out requantified	1.7657	1.8018	1.7224	1.9221
719	sp|P37268|FDFT_HUMAN	sp|P37268|FDFT_HUMAN	4	4	4	sp|P37268|FDFT_HUMAN Squalene synthase OS=Homo sapiens OX=9606 GN=FDFT1 PE=1 SV=1	1	4	4	4	1	1	2	2	1	2	1	1	1	2	2	1	2	1	1	1	2	2	1	2	1	13.4	13.4	13.4	48.115	417	417	0	21.392	1.9632	0.72379	93.639	7	7	Median	0.22939		1.9632	2.0271
720	sp|P37802|TAGL2_HUMAN;sp|Q9UI15|TAGL3_HUMAN	sp|P37802|TAGL2_HUMAN	12;1	12;1	12;1	sp|P37802|TAGL2_HUMAN Transgelin-2 OS=Homo sapiens OX=9606 GN=TAGLN2 PE=1 SV=3	2	12	12	12	11	10	11	8	11	10	11	11	10	11	8	11	10	11	11	10	11	8	11	10	11	64.8	64.8	64.8	22.391	199	199;199	0	144.6	2.1967	0.96586	30.008	102	15	Leave out requantified	2.1734	2.2734	2.5334	2.1927
721	sp|P37837|TALDO_HUMAN	sp|P37837|TALDO_HUMAN	20	20	20	sp|P37837|TALDO_HUMAN Transaldolase OS=Homo sapiens OX=9606 GN=TALDO1 PE=1 SV=2	1	20	20	20	14	18	19	13	15	15	16	14	18	19	13	15	15	16	14	18	19	13	15	15	16	51.3	51.3	51.3	37.54	337	337	0	58.143	1.9709	0.81056	19.204	120	12	Leave out requantified	2.0675	1.9533	2.0362	2.0053
722	sp|P37840|SYUA_HUMAN	sp|P37840|SYUA_HUMAN	4	4	4	sp|P37840|SYUA_HUMAN Alpha-synuclein OS=Homo sapiens OX=9606 GN=SNCA PE=1 SV=1	1	4	4	4	3	3	3	3	2	2	2	3	3	3	3	2	2	2	3	3	3	3	2	2	2	36.4	36.4	36.4	14.46	140	140	0	72.865	0.2104	0.10185	88.858	15	15	Median	0.111	0.22872	0.16563	0.1857
723	sp|P38117|ETFB_HUMAN	sp|P38117|ETFB_HUMAN	5	5	5	sp|P38117|ETFB_HUMAN Electron transfer flavoprotein subunit beta OS=Homo sapiens OX=9606 GN=ETFB PE=1 SV=3	1	5	5	5	3	2	5	3	3	3	1	3	2	5	3	3	3	1	3	2	5	3	3	3	1	20	20	20	27.843	255	255	0	3.4179	2.6578	1.119	18.502	20	12	Leave out requantified	2.4971	2.7396	2.5152	3.1935
724	sp|P38159|RBMX_HUMAN;sp|Q96E39|RMXL1_HUMAN;sp|O75526|RMXL2_HUMAN;sp|Q8N7X1|RMXL3_HUMAN	sp|P38159|RBMX_HUMAN;sp|Q96E39|RMXL1_HUMAN	9;5;2;1	9;5;2;1	9;5;2;1	sp|P38159|RBMX_HUMAN RNA-binding motif protein, X chromosome OS=Homo sapiens OX=9606 GN=RBMX PE=1 SV=3;sp|Q96E39|RMXL1_HUMAN RNA binding motif protein, X-linked-like-1 OS=Homo sapiens OX=9606 GN=RBMXL1 PE=1 SV=1	4	9	9	9	7	5	4	3	5	4	5	7	5	4	3	5	4	5	7	5	4	3	5	4	5	22.8	22.8	22.8	42.331	391	391;390;392;1067	0	32.797	2.7934	1.2085	21.292	31	11	Leave out requantified	2.982	2.7973	2.5044	2.7663
726	sp|P38606|VATA_HUMAN	sp|P38606|VATA_HUMAN	10	10	10	sp|P38606|VATA_HUMAN V-type proton ATPase catalytic subunit A OS=Homo sapiens OX=9606 GN=ATP6V1A PE=1 SV=2	1	10	10	10	4	4	3	5	3	4	2	4	4	3	5	3	4	2	4	4	3	5	3	4	2	23.3	23.3	23.3	68.303	617	617	0	24.009	2.1759	0.96118	21.295	16	10	Leave out requantified	0.91712	0.66399	2.3651	2.1398
727	sp|P38646|GRP75_HUMAN	sp|P38646|GRP75_HUMAN	47	46	46	sp|P38646|GRP75_HUMAN Stress-70 protein, mitochondrial OS=Homo sapiens OX=9606 GN=HSPA9 PE=1 SV=2	1	47	46	46	35	35	32	34	35	31	35	34	34	31	33	34	30	34	34	34	31	33	34	30	34	63	62	62	73.68	679	679	0	323.31	2.0249	0.89889	28.647	299	59	Leave out requantified	2.1659	1.9903	2.253	2.1825
728	sp|P38919|IF4A3_HUMAN	sp|P38919|IF4A3_HUMAN	11	8	8	sp|P38919|IF4A3_HUMAN Eukaryotic initiation factor 4A-III OS=Homo sapiens OX=9606 GN=EIF4A3 PE=1 SV=4	1	11	8	8	6	5	7	7	6	6	7	4	3	5	5	3	5	7	4	3	5	5	3	5	7	27.5	21.4	21.4	46.871	411	411	0	24.862	3.8996	1.833	25.386	35	17	Leave out requantified	3.8828	3.2684	3.3629	3.3055
729	sp|P39019|RS19_HUMAN	sp|P39019|RS19_HUMAN	12	12	12	sp|P39019|RS19_HUMAN 40S ribosomal protein S19 OS=Homo sapiens OX=9606 GN=RPS19 PE=1 SV=2	1	12	12	12	8	7	9	8	6	9	9	8	7	9	8	6	9	9	8	7	9	8	6	9	9	69	69	69	16.06	145	145	0	18.987	3.4531	1.337	17.254	57	6	Leave out requantified	3.3817	3.4252	3.7245	3.5986
730	sp|P39023|RL3_HUMAN;sp|Q92901|RL3L_HUMAN	sp|P39023|RL3_HUMAN	16;2	16;2	16;2	sp|P39023|RL3_HUMAN 60S ribosomal protein L3 OS=Homo sapiens OX=9606 GN=RPL3 PE=1 SV=2	2	16	16	16	11	13	12	11	12	12	12	11	13	12	11	12	12	12	11	13	12	11	12	12	12	40.2	40.2	40.2	46.108	403	403;407	0	72.994	6.8463	2.7639	21.012	76	39	Leave out requantified	6.9306	6.7297	8.982	7.2943
731	sp|P39656|OST48_HUMAN	sp|P39656|OST48_HUMAN	12	12	12	sp|P39656|OST48_HUMAN Dolichyl-diphosphooligosaccharide--protein glycosyltransferase 48 kDa subunit OS=Homo sapiens OX=9606 GN=DDOST PE=1 SV=4	1	12	12	12	7	9	10	9	9	7	9	7	9	10	9	9	7	9	7	9	10	9	9	7	9	41.9	41.9	41.9	50.8	456	456	0	105.76	3.1378	1.3527	18.847	55	13	Leave out requantified	3.4609	3.3977	3.7691	3.1422
732	sp|P39687|AN32A_HUMAN;sp|O43423|AN32C_HUMAN	sp|P39687|AN32A_HUMAN	6;1	4;1	4;1	sp|P39687|AN32A_HUMAN Acidic leucine-rich nuclear phosphoprotein 32 family member A OS=Homo sapiens OX=9606 GN=ANP32A PE=1 SV=1	2	6	4	4	3	4	4	4	4	6	3	1	2	2	2	2	4	1	1	2	2	2	2	4	1	25.3	16.1	16.1	28.585	249	249;234	0	8.8294	2.0642	0.91785	14.79	16	3	Leave out requantified	1.8282	1.7812	2.6027	2.3227
733	sp|P39748|FEN1_HUMAN	sp|P39748|FEN1_HUMAN	9	9	9	sp|P39748|FEN1_HUMAN Flap endonuclease 1 OS=Homo sapiens OX=9606 GN=FEN1 PE=1 SV=1	1	9	9	9	5	6	4	5	5	4	4	5	6	4	5	5	4	4	5	6	4	5	5	4	4	33.4	33.4	33.4	42.592	380	380	0	56.924	3.5146	1.5794	55.599	31	21	Leave out requantified	3.3553	2.6983	4.4104	1.2818
734	sp|P40121|CAPG_HUMAN	sp|P40121|CAPG_HUMAN	12	12	12	sp|P40121|CAPG_HUMAN Macrophage-capping protein OS=Homo sapiens OX=9606 GN=CAPG PE=1 SV=2	1	12	12	12	10	10	10	12	10	10	10	10	10	10	12	10	10	10	10	10	10	12	10	10	10	53.7	53.7	53.7	38.498	348	348	0	135.72	2.1757	1.0058	34.217	111	20	Leave out requantified	2.745	2.2476	2.7488	2.6323
735	sp|P40123|CAP2_HUMAN	sp|P40123|CAP2_HUMAN	3	2	2	sp|P40123|CAP2_HUMAN Adenylyl cyclase-associated protein 2 OS=Homo sapiens OX=9606 GN=CAP2 PE=1 SV=1	1	3	2	2	1	2	2	2	2	2	1	0	1	1	1	1	1	0	0	1	1	1	1	1	0	7.1	5.5	5.5	52.823	477	477	0	9.746	3.5369	1.3094	91.263	4	4	Linear		2.6144	2.0614
737	sp|P40227|TCPZ_HUMAN;sp|Q92526|TCPW_HUMAN	sp|P40227|TCPZ_HUMAN	23;6	23;6	23;6	sp|P40227|TCPZ_HUMAN T-complex protein 1 subunit zeta OS=Homo sapiens OX=9606 GN=CCT6A PE=1 SV=3	2	23	23	23	15	16	13	18	13	13	16	15	16	13	18	13	13	16	15	16	13	18	13	13	16	52.4	52.4	52.4	58.024	531	531;530	0	131.07	4.6319	1.7638	28.354	127	39	Leave out requantified	4.6291	4.3982	5.2882	4.5785
738	sp|P40261|NNMT_HUMAN	sp|P40261|NNMT_HUMAN	2	2	2	sp|P40261|NNMT_HUMAN Nicotinamide N-methyltransferase OS=Homo sapiens OX=9606 GN=NNMT PE=1 SV=1	1	2	2	2	2	1	1	0	2	1	2	2	1	1	0	2	1	2	2	1	1	0	2	1	2	9.8	9.8	9.8	29.574	264	264	0	14.826	1.9239	0.94136	21.695	7	7	Median	2.1559	1.8823	1.9239
740	sp|P40429|RL13A_HUMAN;sp|Q6NVV1|R13P3_HUMAN	sp|P40429|RL13A_HUMAN	8;3	8;3	8;3	sp|P40429|RL13A_HUMAN 60S ribosomal protein L13a OS=Homo sapiens OX=9606 GN=RPL13A PE=1 SV=2	2	8	8	8	5	7	6	6	6	4	6	5	7	6	6	6	4	6	5	7	6	6	6	4	6	37.4	37.4	37.4	23.577	203	203;102	0	31.611	7.1283	2.8449	26.326	50	22	Leave out requantified	6.2561	6.7905	8.5887	7.9757
741	sp|P40616|ARL1_HUMAN	sp|P40616|ARL1_HUMAN	4	4	4	sp|P40616|ARL1_HUMAN ADP-ribosylation factor-like protein 1 OS=Homo sapiens OX=9606 GN=ARL1 PE=1 SV=1	1	4	4	4	3	3	3	1	3	2	2	3	3	3	1	3	2	2	3	3	3	1	3	2	2	31.5	31.5	31.5	20.417	181	181	0	6.7422	4.8489	2.0003	4.6313	17	8	Leave out requantified	5.6695	5.4172	4.381	4.2298
742	sp|P40763|STAT3_HUMAN	sp|P40763|STAT3_HUMAN	2	2	2	sp|P40763|STAT3_HUMAN Signal transducer and activator of transcription 3 OS=Homo sapiens OX=9606 GN=STAT3 PE=1 SV=2	1	2	2	2	1	0	1	1	1	0	1	1	0	1	1	1	0	1	1	0	1	1	1	0	1	5.2	5.2	5.2	88.067	770	770	0	7.3708	2.2684	1.1744	20.952	3	3	Plateau	1.644			1.8161
743	sp|P40925|MDHC_HUMAN	sp|P40925|MDHC_HUMAN	15	15	15	sp|P40925|MDHC_HUMAN Malate dehydrogenase, cytoplasmic OS=Homo sapiens OX=9606 GN=MDH1 PE=1 SV=4	1	15	15	15	12	14	11	12	12	10	13	12	14	11	12	12	10	13	12	14	11	12	12	10	13	47	47	47	36.426	334	334	0	98.874	2.6652	1.1294	21.956	99	33	Leave out requantified	2.9619	2.8893	3.0135	3.0282
744	sp|P40926|MDHM_HUMAN	sp|P40926|MDHM_HUMAN	19	19	19	sp|P40926|MDHM_HUMAN Malate dehydrogenase, mitochondrial OS=Homo sapiens OX=9606 GN=MDH2 PE=1 SV=3	1	19	19	19	18	18	15	18	17	16	17	18	18	15	18	17	16	17	18	18	15	18	17	16	17	64.8	64.8	64.8	35.503	338	338	0	199.26	2.9638	1.1878	19.687	144	15	Leave out requantified	2.9435	3.0281	3.2947	3.0301
745	sp|P40937|RFC5_HUMAN	sp|P40937|RFC5_HUMAN	2	2	2	sp|P40937|RFC5_HUMAN Replication factor C subunit 5 OS=Homo sapiens OX=9606 GN=RFC5 PE=1 SV=1	1	2	2	2	1	1	1	1	0	0	1	1	1	1	1	0	0	1	1	1	1	1	0	0	1	6.2	6.2	6.2	38.496	340	340	0.0011662	1.588	1.5051	0.60953	73.483	4	4	Median	0.55505	1.0517	2.154	2.4175
746	sp|P40939|ECHA_HUMAN	sp|P40939|ECHA_HUMAN	18	18	18	sp|P40939|ECHA_HUMAN Trifunctional enzyme subunit alpha, mitochondrial OS=Homo sapiens OX=9606 GN=HADHA PE=1 SV=2	1	18	18	18	6	12	12	11	10	12	11	6	12	12	11	10	12	11	6	12	12	11	10	12	11	38.7	38.7	38.7	82.999	763	763	0	152.59	2.7903	1.2121	47.409	73	41	Leave out requantified	2.8275	3.0734	3.8542	2.2441
747	sp|P41091|IF2G_HUMAN;sp|Q2VIR3|IF2GL_HUMAN	sp|P41091|IF2G_HUMAN;sp|Q2VIR3|IF2GL_HUMAN	15;12	15;12	15;12	sp|P41091|IF2G_HUMAN Eukaryotic translation initiation factor 2 subunit 3 OS=Homo sapiens OX=9606 GN=EIF2S3 PE=1 SV=3;sp|Q2VIR3|IF2GL_HUMAN Eukaryotic translation initiation factor 2 subunit 3B OS=Homo sapiens OX=9606 GN=EIF2S3B PE=2 SV=2	2	15	15	15	9	10	11	10	10	11	10	9	10	11	10	10	11	10	9	10	11	10	10	11	10	43.6	43.6	43.6	51.109	472	472;472	0	96.348	3.2815	1.412	14.726	70	25	Leave out requantified	3.1909	3.0683	3.436	3.6452
748	sp|P41227|NAA10_HUMAN;sp|Q9BSU3|NAA11_HUMAN	sp|P41227|NAA10_HUMAN	5;1	5;1	5;1	sp|P41227|NAA10_HUMAN N-alpha-acetyltransferase 10 OS=Homo sapiens OX=9606 GN=NAA10 PE=1 SV=1	2	5	5	5	1	3	3	3	4	3	2	1	3	3	3	4	3	2	1	3	3	3	4	3	2	24.3	24.3	24.3	26.458	235	235;229	0	15.941	2.4022	0.98597	21.792	20	11	Leave out requantified	1.8635	2.0185	2.5771	1.2936
750	sp|P41250|GARS_HUMAN	sp|P41250|GARS_HUMAN	25	25	25	sp|P41250|GARS_HUMAN Glycine--tRNA ligase OS=Homo sapiens OX=9606 GN=GARS1 PE=1 SV=3	1	25	25	25	18	18	17	15	19	19	16	18	18	17	15	19	19	16	18	18	17	15	19	19	16	42.2	42.2	42.2	83.165	739	739	0	180.93	2.1992	0.86665	23.454	140	36	Leave out requantified	2.2802	2.1675	2.5186	2.1964
751	sp|P41252|SYIC_HUMAN	sp|P41252|SYIC_HUMAN	21	21	21	sp|P41252|SYIC_HUMAN Isoleucine--tRNA ligase, cytoplasmic OS=Homo sapiens OX=9606 GN=IARS1 PE=1 SV=2	1	21	21	21	13	11	11	11	10	13	13	13	11	11	11	10	13	13	13	11	11	11	10	13	13	22.2	22.2	22.2	144.5	1262	1262	0	111.23	3.7437	1.9837	32.266	75	37	Leave out requantified	5.1203	5.3475	7.4116	7.1398
752	sp|P41567|EIF1_HUMAN;sp|O60739|EIF1B_HUMAN	sp|P41567|EIF1_HUMAN	3;1	3;1	3;1	sp|P41567|EIF1_HUMAN Eukaryotic translation initiation factor 1 OS=Homo sapiens OX=9606 GN=EIF1 PE=1 SV=1	2	3	3	3	1	2	3	1	2	1	1	1	2	3	1	2	1	1	1	2	3	1	2	1	1	66.4	66.4	66.4	12.732	113	113;113	0	26.49	3.3027	1.62	69.896	11	11	Linear	0.58181	0.85379	1.5415	1.0964
753	sp|P42025|ACTY_HUMAN	sp|P42025|ACTY_HUMAN	5	1	1	sp|P42025|ACTY_HUMAN Beta-centractin OS=Homo sapiens OX=9606 GN=ACTR1B PE=1 SV=1	1	5	1	1	3	3	4	3	3	2	2	1	1	1	1	1	0	1	1	1	1	1	1	0	1	21.5	4	4	42.293	376	376	0	5.9586	2.7242	1.0954	8.7042	6	4	Median	2.5525	2.9075	2.9188	2.9547
754	sp|P42126|ECI1_HUMAN	sp|P42126|ECI1_HUMAN	4	4	4	sp|P42126|ECI1_HUMAN Enoyl-CoA delta isomerase 1, mitochondrial OS=Homo sapiens OX=9606 GN=ECI1 PE=1 SV=1	1	4	4	4	1	2	3	1	3	2	2	1	2	3	1	3	2	2	1	2	3	1	3	2	2	17.9	17.9	17.9	32.816	302	302	0	17.483	2.8751	1.2347	15.212	13	5	Leave out requantified	3.3446	1.2695	1.7545	1.6133
755	sp|P42166|LAP2A_HUMAN	sp|P42166|LAP2A_HUMAN	3	3	2	sp|P42166|LAP2A_HUMAN Lamina-associated polypeptide 2, isoform alpha OS=Homo sapiens OX=9606 GN=TMPO PE=1 SV=2	1	3	3	2	1	2	2	1	1	2	1	1	2	2	1	1	2	1	1	1	2	1	1	2	1	5.6	5.6	3.7	75.491	694	694	0	13.737	1.1579	0.48063	40.542	8	8	Median		0.94974	1.0834	0.61995
756	sp|P42224|STAT1_HUMAN	sp|P42224|STAT1_HUMAN	2	2	2	sp|P42224|STAT1_HUMAN Signal transducer and activator of transcription 1-alpha/beta OS=Homo sapiens OX=9606 GN=STAT1 PE=1 SV=2	1	2	2	2	0	2	0	1	1	0	1	0	2	0	1	1	0	1	0	2	0	1	1	0	1	4	4	4	87.334	750	750	0	8.8734	1.2891	0.48734	63.845	5	4	Median		2.4084		0.87208
758	sp|P42330|AK1C3_HUMAN;sp|Q04828|AK1C1_HUMAN;sp|P52895|AK1C2_HUMAN;sp|P17516|AK1C4_HUMAN	sp|P42330|AK1C3_HUMAN;sp|Q04828|AK1C1_HUMAN	6;4;2;2	6;4;2;2	6;4;2;2	sp|P42330|AK1C3_HUMAN Aldo-keto reductase family 1 member C3 OS=Homo sapiens OX=9606 GN=AKR1C3 PE=1 SV=4;sp|Q04828|AK1C1_HUMAN Aldo-keto reductase family 1 member C1 OS=Homo sapiens OX=9606 GN=AKR1C1 PE=1 SV=1	4	6	6	6	5	4	3	5	6	4	4	5	4	3	5	6	4	4	5	4	3	5	6	4	4	24.8	24.8	24.8	36.853	323	323;323;323;323	0	51.65	3.4433	1.5466	4.6236	26	17	Leave out requantified	2.8979	3.5521	4.126	4.0099
761	sp|Q71UM5|RS27L_HUMAN;sp|P42677|RS27_HUMAN	sp|Q71UM5|RS27L_HUMAN;sp|P42677|RS27_HUMAN	2;2	2;2	2;2	sp|Q71UM5|RS27L_HUMAN 40S ribosomal protein S27-like OS=Homo sapiens OX=9606 GN=RPS27L PE=1 SV=3;sp|P42677|RS27_HUMAN 40S ribosomal protein S27 OS=Homo sapiens OX=9606 GN=RPS27 PE=1 SV=3	2	2	2	2	2	2	2	2	2	2	2	2	2	2	2	2	2	2	2	2	2	2	2	2	2	25	25	25	9.4771	84	84;84	0	12.278	4.007	1.5543	20.108	17	5	Leave out requantified	3.6898	3.8702	4.2709	4.4778
762	sp|P42704|LPPRC_HUMAN	sp|P42704|LPPRC_HUMAN	43	43	43	sp|P42704|LPPRC_HUMAN Leucine-rich PPR motif-containing protein, mitochondrial OS=Homo sapiens OX=9606 GN=LRPPRC PE=1 SV=3	1	43	43	43	24	25	28	16	24	19	23	24	25	28	16	24	19	23	24	25	28	16	24	19	23	38.9	38.9	38.9	157.9	1394	1394	0	184.21	3.4067	1.4805	49.399	151	89	Leave out requantified	2.7959	3.3805	4.1018	5.9485
763	sp|P42766|RL35_HUMAN	sp|P42766|RL35_HUMAN	5	5	5	sp|P42766|RL35_HUMAN 60S ribosomal protein L35 OS=Homo sapiens OX=9606 GN=RPL35 PE=1 SV=2	1	5	5	5	3	3	3	4	3	2	3	3	3	3	4	3	2	3	3	3	3	4	3	2	3	32.5	32.5	32.5	14.551	123	123	0	15.605	5.8311	3.1681	83.046	23	9	Leave out requantified	4.1541	5.794	6.5974	6.766
764	sp|P42892|ECE1_HUMAN	sp|P42892|ECE1_HUMAN	10	10	10	sp|P42892|ECE1_HUMAN Endothelin-converting enzyme 1 OS=Homo sapiens OX=9606 GN=ECE1 PE=1 SV=2	1	10	10	10	3	4	4	3	5	4	4	3	4	4	3	5	4	4	3	4	4	3	5	4	4	16.5	16.5	16.5	87.163	770	770	0	23.41	1.6185	0.67659	21.263	26	9	Leave out requantified	1.7813	1.2531	0.60629	2.1008
765	sp|P43034|LIS1_HUMAN	sp|P43034|LIS1_HUMAN	7	7	7	sp|P43034|LIS1_HUMAN Platelet-activating factor acetylhydrolase IB subunit beta OS=Homo sapiens OX=9606 GN=PAFAH1B1 PE=1 SV=2	1	7	7	7	6	4	4	5	4	3	5	6	4	4	5	4	3	5	6	4	4	5	4	3	5	21.2	21.2	21.2	46.637	410	410	0	36.628	2.9222	1.4398	79.472	29	9	Leave out requantified	3.5991	2.9852	2.0637	2.433
766	sp|P43243|MATR3_HUMAN	sp|P43243|MATR3_HUMAN	17	17	17	sp|P43243|MATR3_HUMAN Matrin-3 OS=Homo sapiens OX=9606 GN=MATR3 PE=1 SV=2	1	17	17	17	10	12	12	13	10	11	12	10	12	12	13	10	11	12	10	12	12	13	10	11	12	30.6	30.6	30.6	94.622	847	847	0	134.54	3.5707	1.3895	65.567	91	41	Leave out requantified	4.0096	3.9076	4.4457	3.7271
767	sp|P43246|MSH2_HUMAN	sp|P43246|MSH2_HUMAN	3	3	3	sp|P43246|MSH2_HUMAN DNA mismatch repair protein Msh2 OS=Homo sapiens OX=9606 GN=MSH2 PE=1 SV=1	1	3	3	3	0	1	1	1	1	1	1	0	1	1	1	1	1	1	0	1	1	1	1	1	1	3.2	3.2	3.2	104.74	934	934	0	3.9282	0.66025	0.25299	50.716	6	6	Median		0.50264	0.6895	0.29814
768	sp|P43304|GPDM_HUMAN	sp|P43304|GPDM_HUMAN	7	7	7	sp|P43304|GPDM_HUMAN Glycerol-3-phosphate dehydrogenase, mitochondrial OS=Homo sapiens OX=9606 GN=GPD2 PE=1 SV=3	1	7	7	7	0	1	3	1	2	1	2	0	1	3	1	2	1	2	0	1	3	1	2	1	2	13.2	13.2	13.2	80.852	727	727	0	9.6208	1.4395	0.61354	20.921	9	5	Leave out requantified		0.97796	0.85185	1.4395
769	sp|P43307|SSRA_HUMAN	sp|P43307|SSRA_HUMAN	2	2	2	sp|P43307|SSRA_HUMAN Translocon-associated protein subunit alpha OS=Homo sapiens OX=9606 GN=SSR1 PE=1 SV=3	1	2	2	2	1	1	1	1	1	2	1	1	1	1	1	1	2	1	1	1	1	1	1	2	1	8	8	8	32.235	286	286	0	30.421	2.3977	1.0521	26.127	15	0	Leave out requantified	2.2476	1.8941	2.6725	2.5222
770	sp|P43487|RANG_HUMAN	sp|P43487|RANG_HUMAN	3	3	3	sp|P43487|RANG_HUMAN Ran-specific GTPase-activating protein OS=Homo sapiens OX=9606 GN=RANBP1 PE=1 SV=1	1	3	3	3	3	1	2	3	2	2	2	3	1	2	3	2	2	2	3	1	2	3	2	2	2	21.4	21.4	21.4	23.31	201	201	0	21.798	1.5042	0.69831	7.2956	19	6	Leave out requantified	2.0187	1.4461	1.845	1.7572
771	sp|P43490|NAMPT_HUMAN	sp|P43490|NAMPT_HUMAN	22	22	22	sp|P43490|NAMPT_HUMAN Nicotinamide phosphoribosyltransferase OS=Homo sapiens OX=9606 GN=NAMPT PE=1 SV=1	1	22	22	22	12	13	13	13	13	14	13	12	13	13	13	13	14	13	12	13	13	13	13	14	13	54	54	54	55.52	491	491	0	280.47	2.5517	1.1929	34.992	96	16	Leave out requantified	2.794	3.1167	3.113	3.3338
772	sp|P43686|PRS6B_HUMAN	sp|P43686|PRS6B_HUMAN	14	14	14	sp|P43686|PRS6B_HUMAN 26S proteasome regulatory subunit 6B OS=Homo sapiens OX=9606 GN=PSMC4 PE=1 SV=2	1	14	14	14	3	8	9	5	8	6	6	3	8	9	5	8	6	6	3	8	9	5	8	6	6	48.6	48.6	48.6	47.366	418	418	0	58.864	3.5992	1.5478	25.077	45	21	Leave out requantified	3.9458	3.8279	4.573	3.7025
773	sp|P45880|VDAC2_HUMAN	sp|P45880|VDAC2_HUMAN	16	16	16	sp|P45880|VDAC2_HUMAN Voltage-dependent anion-selective channel protein 2 OS=Homo sapiens OX=9606 GN=VDAC2 PE=1 SV=2	1	16	16	16	10	13	12	14	8	10	11	10	13	12	14	8	10	11	10	13	12	14	8	10	11	62.2	62.2	62.2	31.566	294	294	0	124.52	3.3274	1.4063	19.24	77	23	Leave out requantified	3.376	3.2258	3.9554	3.6462
774	sp|P45974|UBP5_HUMAN;sp|Q92995|UBP13_HUMAN	sp|P45974|UBP5_HUMAN	20;2	20;2	20;2	sp|P45974|UBP5_HUMAN Ubiquitin carboxyl-terminal hydrolase 5 OS=Homo sapiens OX=9606 GN=USP5 PE=1 SV=2	2	20	20	20	13	14	9	12	12	10	13	13	14	9	12	12	10	13	13	14	9	12	12	10	13	33.7	33.7	33.7	95.785	858	858;863	0	82.234	1.6723	0.71717	27.672	86	27	Leave out requantified	1.5648	1.7011	1.9458	1.7551
775	sp|P46060|RAGP1_HUMAN	sp|P46060|RAGP1_HUMAN	17	17	17	sp|P46060|RAGP1_HUMAN Ran GTPase-activating protein 1 OS=Homo sapiens OX=9606 GN=RANGAP1 PE=1 SV=1	1	17	17	17	9	13	7	8	7	12	10	9	13	7	8	7	12	10	9	13	7	8	7	12	10	34.2	34.2	34.2	63.541	587	587	0	91.282	2.3259	0.93266	24.983	65	12	Leave out requantified	2.2502	2.2024	2.7977	2.482
777	sp|P46379|BAG6_HUMAN	sp|P46379|BAG6_HUMAN	8	8	8	sp|P46379|BAG6_HUMAN Large proline-rich protein BAG6 OS=Homo sapiens OX=9606 GN=BAG6 PE=1 SV=2	1	8	8	8	3	5	3	3	5	2	1	3	5	3	3	5	2	1	3	5	3	3	5	2	1	10.2	10.2	10.2	119.41	1132	1132	0	35.151	1.5147	0.82656	41.577	22	7	Leave out requantified	2.0474	1.5257	1.6007	1.5201
778	sp|P46459|NSF_HUMAN	sp|P46459|NSF_HUMAN	5	5	5	sp|P46459|NSF_HUMAN Vesicle-fusing ATPase OS=Homo sapiens OX=9606 GN=NSF PE=1 SV=3	1	5	5	5	2	3	2	2	2	2	2	2	3	2	2	2	2	2	2	3	2	2	2	2	2	10.6	10.6	10.6	82.593	744	744	0	15.553	2.8134	1.4096	48.438	15	11	Leave out requantified	2.0076	0.96817	1.7255	1.7159
779	sp|P46776|RL27A_HUMAN	sp|P46776|RL27A_HUMAN	4	4	4	sp|P46776|RL27A_HUMAN 60S ribosomal protein L27a OS=Homo sapiens OX=9606 GN=RPL27A PE=1 SV=2	1	4	4	4	2	3	2	2	2	2	1	2	3	2	2	2	2	1	2	3	2	2	2	2	1	28.4	28.4	28.4	16.561	148	148	0	23.522	5.2837	2.3957	47.528	12	6	Median	5.5109	5.2911	8.2347	6.979
780	sp|P46777|RL5_HUMAN	sp|P46777|RL5_HUMAN	11	11	11	sp|P46777|RL5_HUMAN 60S ribosomal protein L5 OS=Homo sapiens OX=9606 GN=RPL5 PE=1 SV=3	1	11	11	11	8	7	5	8	8	7	6	8	7	5	8	8	7	6	8	7	5	8	8	7	6	38	38	38	34.362	297	297	0	39.379	4.6156	2.0962	29.057	44	18	Leave out requantified	5.9646	5.2967	7.5253	4.381
781	sp|P46778|RL21_HUMAN	sp|P46778|RL21_HUMAN	5	5	5	sp|P46778|RL21_HUMAN 60S ribosomal protein L21 OS=Homo sapiens OX=9606 GN=RPL21 PE=1 SV=2	1	5	5	5	3	2	4	3	3	3	4	3	2	4	3	3	3	4	3	2	4	3	3	3	4	34.4	34.4	34.4	18.565	160	160	0	37.824	5.9889	2.642	28.466	29	21	Leave out requantified	5.5287	7.2577	4.3519	4.459
782	sp|P46779|RL28_HUMAN	sp|P46779|RL28_HUMAN	8	8	8	sp|P46779|RL28_HUMAN 60S ribosomal protein L28 OS=Homo sapiens OX=9606 GN=RPL28 PE=1 SV=3	1	8	8	8	7	7	4	5	4	6	5	7	7	4	5	4	6	5	7	7	4	5	4	6	5	46	46	46	15.747	137	137	0	11.916	5.6742	2.4066	12.239	38	23	Leave out requantified	3.0711	7.0902	4.5081	5.5258
783	sp|P46781|RS9_HUMAN	sp|P46781|RS9_HUMAN	17	17	17	sp|P46781|RS9_HUMAN 40S ribosomal protein S9 OS=Homo sapiens OX=9606 GN=RPS9 PE=1 SV=3	1	17	17	17	11	10	12	12	11	14	9	11	10	12	12	11	14	9	11	10	12	12	11	14	9	58.8	58.8	58.8	22.591	194	194	0	21.578	6.3279	2.4774	21.423	88	24	Leave out requantified	6.3467	6.7108	7.3094	7.607
784	sp|P46782|RS5_HUMAN	sp|P46782|RS5_HUMAN	12	12	12	sp|P46782|RS5_HUMAN 40S ribosomal protein S5 OS=Homo sapiens OX=9606 GN=RPS5 PE=1 SV=4	1	12	12	12	9	9	7	9	9	11	8	9	9	7	9	9	11	8	9	9	7	9	9	11	8	57.8	57.8	57.8	22.876	204	204	0	111.57	4.286	1.6577	21.149	72	36	Leave out requantified	4.3459	4.6057	4.9964	5.439
785	sp|P46783|RS10_HUMAN;sp|Q9NQ39|RS10L_HUMAN	sp|P46783|RS10_HUMAN	10;4	10;4	10;4	sp|P46783|RS10_HUMAN 40S ribosomal protein S10 OS=Homo sapiens OX=9606 GN=RPS10 PE=1 SV=1	2	10	10	10	6	5	4	5	4	6	5	6	5	4	5	4	6	5	6	5	4	5	4	6	5	64.8	64.8	64.8	18.898	165	165;176	0	31.863	3.4327	2.1189	44.467	38	12	Leave out requantified	4.7575	4.014	4.6228	3.2456
786	sp|P46821|MAP1B_HUMAN	sp|P46821|MAP1B_HUMAN	9	9	9	sp|P46821|MAP1B_HUMAN Microtubule-associated protein 1B OS=Homo sapiens OX=9606 GN=MAP1B PE=1 SV=2	1	9	9	9	2	3	5	2	4	1	1	2	3	5	2	4	1	1	2	3	5	2	4	1	1	5.6	5.6	5.6	270.63	2468	2468	0	19.844	1.9957	0.77092	41.371	10	10	Median	2.4014	1.7864	2.2295	1.4641
787	sp|P46926|GNPI1_HUMAN;sp|Q8TDQ7|GNPI2_HUMAN	sp|P46926|GNPI1_HUMAN	9;3	9;3	9;3	sp|P46926|GNPI1_HUMAN Glucosamine-6-phosphate isomerase 1 OS=Homo sapiens OX=9606 GN=GNPDA1 PE=1 SV=1	2	9	9	9	5	5	2	2	5	3	4	5	5	2	2	5	3	4	5	5	2	2	5	3	4	43.3	43.3	43.3	32.668	289	289;276	0	22.09	2.9338	1.3462	28.139	27	17	Leave out requantified	1.7699	2.9	1.5007	3.5062
788	sp|P46939|UTRN_HUMAN;sp|P11532|DMD_HUMAN	sp|P46939|UTRN_HUMAN;sp|P11532|DMD_HUMAN	4;2	4;2	4;2	sp|P46939|UTRN_HUMAN Utrophin OS=Homo sapiens OX=9606 GN=UTRN PE=1 SV=2;sp|P11532|DMD_HUMAN Dystrophin OS=Homo sapiens OX=9606 GN=DMD PE=1 SV=3	2	4	4	4	1	2	2	2	3	3	1	1	2	2	2	3	3	1	1	2	2	2	3	3	1	1.2	1.2	1.2	394.46	3433	3433;3685	0	5.7249	1.6272	0.75368	49.209	12	7	Leave out requantified	1.7092	1.0692	1.4261	2.0135
789	sp|P46940|IQGA1_HUMAN;sp|Q13576|IQGA2_HUMAN	sp|P46940|IQGA1_HUMAN	57;1	57;1	55;0	sp|P46940|IQGA1_HUMAN Ras GTPase-activating-like protein IQGAP1 OS=Homo sapiens OX=9606 GN=IQGAP1 PE=1 SV=1	2	57	57	55	29	35	42	34	38	39	40	29	35	42	34	38	39	40	28	34	40	32	36	38	39	50.1	50.1	49.1	189.25	1657	1657;1575	0	323.31	3.117	1.3216	30.927	279	110	Leave out requantified	3.5308	3.2645	3.5782	3.2627
790	sp|P46976|GLYG_HUMAN	sp|P46976|GLYG_HUMAN	2	2	2	sp|P46976|GLYG_HUMAN Glycogenin-1 OS=Homo sapiens OX=9606 GN=GYG1 PE=1 SV=4	1	2	2	2	0	0	2	1	1	2	0	0	0	2	1	1	2	0	0	0	2	1	1	2	0	4.9	4.9	4.9	39.383	350	350	0.0011689	1.6042	1.9767	0.93477	26.091	6	3	Median			1.9767	1.6895
791	sp|P46977|STT3A_HUMAN	sp|P46977|STT3A_HUMAN	7	7	6	sp|P46977|STT3A_HUMAN Dolichyl-diphosphooligosaccharide--protein glycosyltransferase subunit STT3A OS=Homo sapiens OX=9606 GN=STT3A PE=1 SV=2	1	7	7	6	4	3	4	3	3	4	1	4	3	4	3	3	4	1	4	3	3	2	3	4	1	11.3	11.3	10.4	80.529	705	705	0	17.856	2.4583	0.94796	36.33	18	13	Leave out requantified	0.65887	2.3476	2.9224	2.6661
792	sp|P47755|CAZA2_HUMAN	sp|P47755|CAZA2_HUMAN	10	8	8	sp|P47755|CAZA2_HUMAN F-actin-capping protein subunit alpha-2 OS=Homo sapiens OX=9606 GN=CAPZA2 PE=1 SV=3	1	10	8	8	6	9	9	8	7	8	8	4	7	7	6	6	6	6	4	7	7	6	6	6	6	46.9	40.9	40.9	32.949	286	286	0	81.704	1.9781	0.8117	16.888	39	20	Leave out requantified	2.1226	2.2103	2.1782	2.0548
793	sp|P47756|CAPZB_HUMAN	sp|P47756|CAPZB_HUMAN	15	15	15	sp|P47756|CAPZB_HUMAN F-actin-capping protein subunit beta OS=Homo sapiens OX=9606 GN=CAPZB PE=1 SV=4	1	15	15	15	10	10	13	9	9	10	13	10	10	13	9	9	10	13	10	10	13	9	9	10	13	56	56	56	31.35	277	277	0	116.89	2.1839	0.88885	24.559	88	25	Leave out requantified	2.2708	2.0344	2.2419	2.2113
794	sp|P47897|SYQ_HUMAN	sp|P47897|SYQ_HUMAN	21	21	21	sp|P47897|SYQ_HUMAN Glutamine--tRNA ligase OS=Homo sapiens OX=9606 GN=QARS1 PE=1 SV=1	1	21	21	21	10	10	10	9	7	9	8	10	10	10	9	7	9	8	10	10	10	9	7	9	8	33	33	33	87.798	775	775	0	75.153	3.9659	1.81	30.622	61	32	Leave out requantified	4.6477	4.3644	5.5741	5.3048
795	sp|P47914|RL29_HUMAN	sp|P47914|RL29_HUMAN	2	2	2	sp|P47914|RL29_HUMAN 60S ribosomal protein L29 OS=Homo sapiens OX=9606 GN=RPL29 PE=1 SV=2	1	2	2	2	1	1	2	1	1	1	1	1	1	2	1	1	1	1	1	1	2	1	1	1	1	14.5	14.5	14.5	17.752	159	159	0	3.9699	2.708	1.0557	1.0911	8	0	Leave out requantified	2.5102	2.5864	2.7838	2.4299
796	sp|P48047|ATPO_HUMAN	sp|P48047|ATPO_HUMAN	5	5	5	sp|P48047|ATPO_HUMAN ATP synthase subunit O, mitochondrial OS=Homo sapiens OX=9606 GN=ATP5PO PE=1 SV=1	1	5	5	5	0	2	3	3	0	2	2	0	2	3	3	0	2	2	0	2	3	3	0	2	2	29.6	29.6	29.6	23.277	213	213	0	12.108	1.9233	0.80875	41.863	10	8	Median		1.943	1.9038	1.7339
798	sp|P48147|PPCE_HUMAN	sp|P48147|PPCE_HUMAN	5	5	5	sp|P48147|PPCE_HUMAN Prolyl endopeptidase OS=Homo sapiens OX=9606 GN=PREP PE=1 SV=2	1	5	5	5	3	3	3	3	3	3	3	3	3	3	3	3	3	3	3	3	3	3	3	3	3	10.7	10.7	10.7	80.699	710	710	0	34.051	2.0529	0.75986	31.619	21	10	Leave out requantified	1.9936	1.6429	2.6787	1.9238
800	sp|P48444|COPD_HUMAN	sp|P48444|COPD_HUMAN	16	16	16	sp|P48444|COPD_HUMAN Coatomer subunit delta OS=Homo sapiens OX=9606 GN=ARCN1 PE=1 SV=1	1	16	16	16	8	9	11	8	8	7	9	8	9	11	8	8	7	9	8	9	11	8	8	7	9	35.2	35.2	35.2	57.21	511	511	0	54.859	3.8313	1.6404	24.339	55	25	Leave out requantified	4.2491	3.9153	3.9077	4.3494
801	sp|P48449|LSS_HUMAN	sp|P48449|LSS_HUMAN	11	11	11	sp|P48449|LSS_HUMAN Lanosterol synthase OS=Homo sapiens OX=9606 GN=LSS PE=1 SV=1	1	11	11	11	6	11	6	5	4	6	6	6	11	6	5	4	6	6	6	11	6	5	4	6	6	18.7	18.7	18.7	83.308	732	732	0	37.849	2.0487	0.9653	21.841	39	14	Leave out requantified	2.126	2.0779	1.794	2.2694
802	sp|P48507|GSH0_HUMAN	sp|P48507|GSH0_HUMAN	3	3	3	sp|P48507|GSH0_HUMAN Glutamate--cysteine ligase regulatory subunit OS=Homo sapiens OX=9606 GN=GCLM PE=1 SV=1	1	3	3	3	2	0	1	1	1	2	1	2	0	1	1	1	2	1	2	0	1	1	1	2	1	13.9	13.9	13.9	30.727	274	274	0	9.0994	0.68698	0.24466	81.576	7	7	Median	1.7599		0.30707	0.49577
803	sp|P48509|CD151_HUMAN	sp|P48509|CD151_HUMAN	6	6	6	sp|P48509|CD151_HUMAN CD151 antigen OS=Homo sapiens OX=9606 GN=CD151 PE=1 SV=3	1	6	6	6	5	5	6	5	5	5	4	5	5	6	5	5	5	4	5	5	6	5	5	5	4	19.8	19.8	19.8	28.295	253	253	0	12.335	1.6137	0.66731	8.493	36	2	Leave out requantified	1.6666	1.6454	1.6818	1.7874
804	sp|P48556|PSMD8_HUMAN	sp|P48556|PSMD8_HUMAN	5	5	5	sp|P48556|PSMD8_HUMAN 26S proteasome non-ATPase regulatory subunit 8 OS=Homo sapiens OX=9606 GN=PSMD8 PE=1 SV=2	1	5	5	5	2	3	4	4	4	4	3	2	3	4	4	4	4	3	2	3	4	4	4	4	3	20.6	20.6	20.6	39.611	350	350	0	14.434	3.2469	1.2207	11.447	25	8	Leave out requantified	3.1554	3.16	2.1322	3.5029
805	sp|P48637|GSHB_HUMAN	sp|P48637|GSHB_HUMAN	4	4	4	sp|P48637|GSHB_HUMAN Glutathione synthetase OS=Homo sapiens OX=9606 GN=GSS PE=1 SV=1	1	4	4	4	1	1	3	1	2	2	2	1	1	3	1	2	2	2	1	1	3	1	2	2	2	11.4	11.4	11.4	52.384	474	474	0	11.743	0.8672	0.35853	55.136	11	10	Median	0.68727	0.64885	1.16	1.0586
806	sp|P48643|TCPE_HUMAN	sp|P48643|TCPE_HUMAN	30	30	30	sp|P48643|TCPE_HUMAN T-complex protein 1 subunit epsilon OS=Homo sapiens OX=9606 GN=CCT5 PE=1 SV=1	1	30	30	30	15	23	20	16	18	19	20	15	23	20	16	18	19	20	15	23	20	16	18	19	20	74.9	74.9	74.9	59.67	541	541	0	323.31	3.0194	1.4112	25.581	152	39	Leave out requantified	3.7916	3.5473	3.6775	3.3276
808	sp|P48723|HSP13_HUMAN	sp|P48723|HSP13_HUMAN	1	1	1	sp|P48723|HSP13_HUMAN Heat shock 70 kDa protein 13 OS=Homo sapiens OX=9606 GN=HSPA13 PE=1 SV=1	1	1	1	1	1	1	1	0	0	0	1	1	1	1	0	0	0	1	1	1	1	0	0	0	1	2.1	2.1	2.1	51.927	471	471	0.0039863	1.3779	2.0022	0.91877	16.317	3	2	Median	2.1105		1.8449
809	sp|Q8N752|KC1AL_HUMAN;sp|P48729|KC1A_HUMAN	sp|Q8N752|KC1AL_HUMAN;sp|P48729|KC1A_HUMAN	2;2	2;2	2;2	sp|Q8N752|KC1AL_HUMAN Casein kinase I isoform alpha-like OS=Homo sapiens OX=9606 GN=CSNK1A1L PE=2 SV=2;sp|P48729|KC1A_HUMAN Casein kinase I isoform alpha OS=Homo sapiens OX=9606 GN=CSNK1A1 PE=1 SV=2	2	2	2	2	1	1	1	1	1	2	1	1	1	1	1	1	2	1	1	1	1	1	1	2	1	6.5	6.5	6.5	39.085	337	337;337	0	4.945	2.9572	1.3473	57.119	8	6	Median	2.1288	1.6987	4.8616	4.6907
810	sp|P48735|IDHP_HUMAN	sp|P48735|IDHP_HUMAN	5	4	4	sp|P48735|IDHP_HUMAN Isocitrate dehydrogenase [NADP], mitochondrial OS=Homo sapiens OX=9606 GN=IDH2 PE=1 SV=2	1	5	4	4	3	4	3	1	3	4	2	3	4	3	1	3	3	2	3	4	3	1	3	3	2	11.3	9.3	9.3	50.909	452	452	0	3.9141	3.1856	1.3937	34.249	15	12	Median	3.6689	4.5835	2.9554	3.1856
811	sp|P48739|PIPNB_HUMAN	sp|P48739|PIPNB_HUMAN	5	5	5	sp|P48739|PIPNB_HUMAN Phosphatidylinositol transfer protein beta isoform OS=Homo sapiens OX=9606 GN=PITPNB PE=1 SV=2	1	5	5	5	2	0	2	0	3	3	3	2	0	2	0	3	3	3	2	0	2	0	3	3	3	23.6	23.6	23.6	31.54	271	271	0	6.2333	0.86933	0.40061	99.765	11	2	Leave out requantified	2.9043		0.73857
812	sp|P48960|AGRE5_HUMAN	sp|P48960|AGRE5_HUMAN	8	8	8	sp|P48960|AGRE5_HUMAN Adhesion G protein-coupled receptor E5 OS=Homo sapiens OX=9606 GN=ADGRE5 PE=1 SV=4	1	8	8	8	5	6	6	7	7	7	7	5	6	6	7	7	7	7	5	6	6	7	7	7	7	11.7	11.7	11.7	91.868	835	835	0	98.343	1.9131	0.84894	21.556	58	22	Leave out requantified	2.3566	2.073	2.4399	2.1966
813	sp|P49189|AL9A1_HUMAN	sp|P49189|AL9A1_HUMAN	11	11	11	sp|P49189|AL9A1_HUMAN 4-trimethylaminobutyraldehyde dehydrogenase OS=Homo sapiens OX=9606 GN=ALDH9A1 PE=1 SV=3	1	11	11	11	7	6	7	4	5	8	6	7	6	7	4	5	8	6	7	6	7	4	5	8	6	25.5	25.5	25.5	53.801	494	494	0	47.554	2.9904	1.4129	15.909	43	15	Leave out requantified	3.0948	3.099	3.6505	3.4211
814	sp|P49207|RL34_HUMAN	sp|P49207|RL34_HUMAN	5	5	5	sp|P49207|RL34_HUMAN 60S ribosomal protein L34 OS=Homo sapiens OX=9606 GN=RPL34 PE=1 SV=3	1	5	5	5	3	4	3	2	3	3	4	3	4	3	2	3	3	4	3	4	3	2	3	3	4	29.1	29.1	29.1	13.293	117	117	0	5.8592	4.8218	2.4124	10.528	20	16	Leave out requantified	4.8737	2.6372	2.0859	7.5015
815	sp|P49257|LMAN1_HUMAN	sp|P49257|LMAN1_HUMAN	4	4	4	sp|P49257|LMAN1_HUMAN Protein ERGIC-53 OS=Homo sapiens OX=9606 GN=LMAN1 PE=1 SV=2	1	4	4	4	0	3	3	3	4	1	1	0	3	3	3	4	1	1	0	3	3	3	4	1	1	15.7	15.7	15.7	57.548	510	510	0	10.328	0.53832	0.21083	57.089	10	8	Median		0.46396	0.57709	0.77311
816	sp|P49321|NASP_HUMAN	sp|P49321|NASP_HUMAN	11	11	11	sp|P49321|NASP_HUMAN Nuclear autoantigenic sperm protein OS=Homo sapiens OX=9606 GN=NASP PE=1 SV=2	1	11	11	11	5	5	4	5	6	7	4	5	5	4	5	6	7	4	5	5	4	5	6	7	4	21.1	21.1	21.1	85.237	788	788	0	46.479	1.6644	0.69871	34.709	43	15	Leave out requantified	1.5656	1.5698	1.6825	1.7081
817	sp|P49327|FAS_HUMAN	sp|P49327|FAS_HUMAN	114	114	114	sp|P49327|FAS_HUMAN Fatty acid synthase OS=Homo sapiens OX=9606 GN=FASN PE=1 SV=3	1	114	114	114	79	80	86	81	83	85	84	79	80	86	81	83	85	84	79	80	86	81	83	85	84	58.6	58.6	58.6	273.42	2511	2511	0	323.31	4.0672	1.7133	32.17	651	231	Leave out requantified	4.3567	4.1602	5.2074	4.6794
818	sp|P49366|DHYS_HUMAN	sp|P49366|DHYS_HUMAN	2	2	2	sp|P49366|DHYS_HUMAN Deoxyhypusine synthase OS=Homo sapiens OX=9606 GN=DHPS PE=1 SV=1	1	2	2	2	1	1	2	2	0	2	2	1	1	2	2	0	2	2	1	1	2	2	0	2	2	8.4	8.4	8.4	40.97	369	369	0	21.879	1.1072	0.47318	16.258	10	5	Median	1.7176	1.0425	1.1569	1.2679
819	sp|P49368|TCPG_HUMAN	sp|P49368|TCPG_HUMAN	27	27	27	sp|P49368|TCPG_HUMAN T-complex protein 1 subunit gamma OS=Homo sapiens OX=9606 GN=CCT3 PE=1 SV=4	1	27	27	27	15	18	18	16	15	20	16	15	18	18	16	15	20	16	15	18	18	16	15	20	16	55.6	55.6	55.6	60.533	545	545	0	146.45	3.8723	1.6916	38.812	146	57	Leave out requantified	4.5063	4.0772	4.8846	4.3124
821	sp|P49411|EFTU_HUMAN	sp|P49411|EFTU_HUMAN	12	12	12	sp|P49411|EFTU_HUMAN Elongation factor Tu, mitochondrial OS=Homo sapiens OX=9606 GN=TUFM PE=1 SV=2	1	12	12	12	8	7	9	5	8	6	7	8	7	9	5	8	6	7	8	7	9	5	8	6	7	32.7	32.7	32.7	49.541	452	452	0	86.499	5.6031	2.3105	22.863	45	23	Leave out requantified	5.7646	5.2789	6.6498	4.3803
822	sp|P49419|AL7A1_HUMAN	sp|P49419|AL7A1_HUMAN	13	13	13	sp|P49419|AL7A1_HUMAN Alpha-aminoadipic semialdehyde dehydrogenase OS=Homo sapiens OX=9606 GN=ALDH7A1 PE=1 SV=5	1	13	13	13	10	9	7	8	10	9	8	10	9	7	8	10	9	8	10	9	7	8	10	9	8	36.2	36.2	36.2	58.486	539	539	0	52.946	2.2055	0.98246	16.776	60	41	Leave out requantified	2.1275	2.7962	1.4053	1.4054
824	sp|P49454|CENPF_HUMAN	sp|P49454|CENPF_HUMAN	2	2	2	sp|P49454|CENPF_HUMAN Centromere protein F OS=Homo sapiens OX=9606 GN=CENPF PE=1 SV=3	1	2	2	2	0	0	1	1	2	0	0	0	0	1	1	2	0	0	0	0	1	1	2	0	0	0.6	0.6	0.6	357.52	3114	3114	0.0040046	1.4185	0.48219	0.18148	42.667	4	4	Median			0.31446	0.63621
825	sp|P49458|SRP09_HUMAN	sp|P49458|SRP09_HUMAN	3	3	3	sp|P49458|SRP09_HUMAN Signal recognition particle 9 kDa protein OS=Homo sapiens OX=9606 GN=SRP9 PE=1 SV=2	1	3	3	3	1	2	2	1	2	2	2	1	2	2	1	2	2	2	1	2	2	1	2	2	2	36	36	36	10.112	86	86	0	5.989	1.8807	0.72401	61.905	12	9	Median	1.9329	2.5628	1.1473	2.5695
827	sp|P49585|PCY1A_HUMAN;sp|Q9Y5K3|PCY1B_HUMAN	sp|P49585|PCY1A_HUMAN;sp|Q9Y5K3|PCY1B_HUMAN	2;1	2;1	2;1	sp|P49585|PCY1A_HUMAN Choline-phosphate cytidylyltransferase A OS=Homo sapiens OX=9606 GN=PCYT1A PE=1 SV=2;sp|Q9Y5K3|PCY1B_HUMAN Choline-phosphate cytidylyltransferase B OS=Homo sapiens OX=9606 GN=PCYT1B PE=1 SV=1	2	2	2	2	1	2	1	2	1	1	1	1	2	1	2	1	1	1	1	2	1	2	1	1	1	9.5	9.5	9.5	41.731	367	367;369	0	5.0918	2.4668	0.81861	73.588	10	4	Plateau	2.2839	1.7441	2.7487	1.9327
828	sp|P49588|SYAC_HUMAN	sp|P49588|SYAC_HUMAN	17	17	17	sp|P49588|SYAC_HUMAN Alanine--tRNA ligase, cytoplasmic OS=Homo sapiens OX=9606 GN=AARS1 PE=1 SV=2	1	17	17	17	5	5	5	7	8	5	7	5	5	5	7	8	5	7	5	5	5	7	8	5	7	21.4	21.4	21.4	106.81	968	968	0	46.254	2.3519	0.96978	29.383	40	12	Leave out requantified	1.7429	2.2977	2.1004	2.4279
829	sp|P49589|SYCC_HUMAN	sp|P49589|SYCC_HUMAN	8	8	8	sp|P49589|SYCC_HUMAN Cysteine--tRNA ligase, cytoplasmic OS=Homo sapiens OX=9606 GN=CARS1 PE=1 SV=3	1	8	8	8	4	5	3	3	3	3	4	4	5	3	3	3	3	4	4	5	3	3	3	3	4	12.2	12.2	12.2	85.472	748	748	0	24.715	1.7536	0.78991	60.253	24	22	Median	1.2981	2.0335	1.6499	2.6017
830	sp|P49591|SYSC_HUMAN	sp|P49591|SYSC_HUMAN	13	13	13	sp|P49591|SYSC_HUMAN Serine--tRNA ligase, cytoplasmic OS=Homo sapiens OX=9606 GN=SARS1 PE=1 SV=3	1	13	13	13	8	9	7	7	7	8	8	8	9	7	7	7	8	8	8	9	7	7	7	8	8	34.6	34.6	34.6	58.777	514	514	0	68.989	2.1268	1.1176	26.226	56	27	Leave out requantified	2.6326	1.81	3.1836	2.9743
831	sp|P49593|PPM1F_HUMAN	sp|P49593|PPM1F_HUMAN	5	5	5	sp|P49593|PPM1F_HUMAN Protein phosphatase 1F OS=Homo sapiens OX=9606 GN=PPM1F PE=1 SV=3	1	5	5	5	3	0	1	1	0	0	1	3	0	1	1	0	0	1	3	0	1	1	0	0	1	18.1	18.1	18.1	49.83	454	454	0	6.2544	1.3147	0.62902	40.741	5	3	Median	1.8249		2.7737	0.85764
832	sp|P49720|PSB3_HUMAN	sp|P49720|PSB3_HUMAN	8	8	8	sp|P49720|PSB3_HUMAN Proteasome subunit beta type-3 OS=Homo sapiens OX=9606 GN=PSMB3 PE=1 SV=2	1	8	8	8	8	8	7	7	8	8	8	8	8	7	7	8	8	8	8	8	7	7	8	8	8	46.8	46.8	46.8	22.949	205	205	0	117.94	2.1324	0.91718	28.316	75	9	Leave out requantified	2.3063	2.0664	2.1602	1.8484
833	sp|P49721|PSB2_HUMAN	sp|P49721|PSB2_HUMAN	7	7	7	sp|P49721|PSB2_HUMAN Proteasome subunit beta type-2 OS=Homo sapiens OX=9606 GN=PSMB2 PE=1 SV=1	1	7	7	7	5	6	5	6	5	5	5	5	6	5	6	5	5	5	5	6	5	6	5	5	5	39.8	39.8	39.8	22.836	201	201	0	43.511	2.2109	0.94334	17.019	39	7	Leave out requantified	2.3729	2.2951	2.343	2.3247
834	sp|P49736|MCM2_HUMAN	sp|P49736|MCM2_HUMAN	12	12	12	sp|P49736|MCM2_HUMAN DNA replication licensing factor MCM2 OS=Homo sapiens OX=9606 GN=MCM2 PE=1 SV=4	1	12	12	12	7	7	9	8	6	6	6	7	7	9	8	6	6	6	7	7	9	8	6	6	6	15.9	15.9	15.9	101.89	904	904	0	54.422	3.4626	1.4165	19.627	48	15	Leave out requantified	3.4158	3.3988	3.9185	3.3829
835	sp|P49748|ACADV_HUMAN	sp|P49748|ACADV_HUMAN	7	7	7	sp|P49748|ACADV_HUMAN Very long-chain specific acyl-CoA dehydrogenase, mitochondrial OS=Homo sapiens OX=9606 GN=ACADVL PE=1 SV=1	1	7	7	7	4	4	4	6	3	1	2	4	4	4	6	3	1	2	4	4	4	6	3	1	2	13	13	13	70.389	655	655	0	15.208	3.3054	1.3453	27.418	24	13	Leave out requantified	1.2551	2.0273	2.5014	3.5044
836	sp|P49755|TMEDA_HUMAN	sp|P49755|TMEDA_HUMAN	9	9	9	sp|P49755|TMEDA_HUMAN Transmembrane emp24 domain-containing protein 10 OS=Homo sapiens OX=9606 GN=TMED10 PE=1 SV=2	1	9	9	9	4	6	6	7	5	5	6	4	6	6	7	5	5	6	4	6	6	7	5	5	6	42.5	42.5	42.5	24.976	219	219	0	66.2	1.8806	1.007	27.044	61	9	Leave out requantified	2.0303	1.91	2.7451	2.1183
837	sp|P49756|RBM25_HUMAN	sp|P49756|RBM25_HUMAN	5	5	5	sp|P49756|RBM25_HUMAN RNA-binding protein 25 OS=Homo sapiens OX=9606 GN=RBM25 PE=1 SV=3	1	5	5	5	2	2	2	3	1	1	0	2	2	2	3	1	1	0	2	2	2	3	1	1	0	8.8	8.8	8.8	100.18	843	843	0	2.6665	1.968	0.9275	37.562	11	8	Median	1.0521	1.8609	2.4088	1.5689
838	sp|P49773|HINT1_HUMAN	sp|P49773|HINT1_HUMAN	10	10	10	sp|P49773|HINT1_HUMAN Histidine triad nucleotide-binding protein 1 OS=Homo sapiens OX=9606 GN=HINT1 PE=1 SV=2	1	10	10	10	7	7	9	8	9	6	7	7	7	9	8	9	6	7	7	7	9	8	9	6	7	84.9	84.9	84.9	13.802	126	126	0	90.612	2.3555	1.0555	17.688	81	18	Leave out requantified	2.5051	2.8176	2.9204	2.7804
839	sp|P49792|RBP2_HUMAN;sp|A6NKT7|RGPD3_HUMAN;sp|P0DJD0|RGPD1_HUMAN;sp|P0DJD1|RGPD2_HUMAN;sp|Q7Z3J3|RGPD4_HUMAN;sp|Q99666|RGPD5_HUMAN;sp|O14715|RGPD8_HUMAN	sp|P49792|RBP2_HUMAN	9;3;2;2;2;2;2	9;3;2;2;2;2;2	8;3;2;2;2;2;2	sp|P49792|RBP2_HUMAN E3 SUMO-protein ligase RanBP2 OS=Homo sapiens OX=9606 GN=RANBP2 PE=1 SV=2	7	9	9	8	3	2	6	2	3	0	0	3	2	6	2	3	0	0	2	2	5	2	2	0	0	3.1	3.1	2.9	358.2	3224	3224;1758;1748;1756;1758;1765;1765	0	7.118	2.9734	1.2026	28.585	12	9	Leave out requantified	2.3244	0.59762	1.9183	1.5525
840	sp|P49902|5NTC_HUMAN	sp|P49902|5NTC_HUMAN	3	3	3	sp|P49902|5NTC_HUMAN Cytosolic purine 5-nucleotidase OS=Homo sapiens OX=9606 GN=NT5C2 PE=1 SV=1	1	3	3	3	1	1	1	0	1	0	1	1	1	1	0	1	0	1	1	1	1	0	1	0	1	9.4	9.4	9.4	64.969	561	561	0	3.2791	3.468	1.5407	102.51	5	3	Median	0.41923	3.468	3.9748
841	sp|P49903|SPS1_HUMAN	sp|P49903|SPS1_HUMAN	3	3	3	sp|P49903|SPS1_HUMAN Selenide, water dikinase 1 OS=Homo sapiens OX=9606 GN=SEPHS1 PE=1 SV=2	1	3	3	3	1	1	0	2	2	1	1	1	1	0	2	2	1	1	1	1	0	2	2	1	1	8.4	8.4	8.4	42.91	392	392	0	2.4008	1.7564	0.84994	14.752	8	2	Leave out requantified	1.6165	1.6266		1.7287
842	sp|P49915|GUAA_HUMAN	sp|P49915|GUAA_HUMAN	10	10	10	sp|P49915|GUAA_HUMAN GMP synthase [glutamine-hydrolyzing] OS=Homo sapiens OX=9606 GN=GMPS PE=1 SV=1	1	10	10	10	3	3	4	3	6	3	5	3	3	4	3	6	3	5	3	3	4	3	6	3	5	21.4	21.4	21.4	76.715	693	693	0	23.08	1.3474	0.73822	38.196	27	14	Leave out requantified	2.3343	1.3469	1.0592	0.86262
844	sp|P50213|IDH3A_HUMAN	sp|P50213|IDH3A_HUMAN	4	4	4	sp|P50213|IDH3A_HUMAN Isocitrate dehydrogenase [NAD] subunit alpha, mitochondrial OS=Homo sapiens OX=9606 GN=IDH3A PE=1 SV=1	1	4	4	4	0	2	1	3	1	1	1	0	2	1	3	1	1	1	0	2	1	3	1	1	1	16.7	16.7	16.7	39.591	366	366	0	12.812	2.8338	1.0184	44.711	9	7	Median		1.5622	2.9252	2.8338
845	sp|P50281|MMP14_HUMAN	sp|P50281|MMP14_HUMAN	2	2	2	sp|P50281|MMP14_HUMAN Matrix metalloproteinase-14 OS=Homo sapiens OX=9606 GN=MMP14 PE=1 SV=3	1	2	2	2	1	1	1	1	2	1	1	1	1	1	1	2	1	1	1	1	1	1	2	1	1	4.6	4.6	4.6	65.893	582	582	0	7.2655	2.1186	0.83758	56.392	7	3	Median	3.1109	0.93732	0.96034	2.6557
846	sp|P50395|GDIB_HUMAN	sp|P50395|GDIB_HUMAN	34	34	25	sp|P50395|GDIB_HUMAN Rab GDP dissociation inhibitor beta OS=Homo sapiens OX=9606 GN=GDI2 PE=1 SV=2	1	34	34	25	22	23	23	25	25	27	27	22	23	23	25	25	27	27	14	16	15	17	18	19	20	87.6	87.6	64.5	50.663	445	445	0	305.67	2.3932	1.0426	27.887	193	48	Leave out requantified	2.4813	2.2689	2.8139	2.6081
847	sp|P50453|SPB9_HUMAN;sp|O75830|SPI2_HUMAN	sp|P50453|SPB9_HUMAN	14;1	14;1	12;0	sp|P50453|SPB9_HUMAN Serpin B9 OS=Homo sapiens OX=9606 GN=SERPINB9 PE=1 SV=1	2	14	14	12	8	7	5	8	8	10	8	8	7	5	8	8	10	8	7	5	4	7	7	9	8	47.3	47.3	41.5	42.403	376	376;405	0	57.367	2.0132	0.83068	28.885	54	13	Leave out requantified	2.0584	2.1395	1.9017	2.0156
848	sp|P50454|SERPH_HUMAN	sp|P50454|SERPH_HUMAN	13	13	13	sp|P50454|SERPH_HUMAN Serpin H1 OS=Homo sapiens OX=9606 GN=SERPINH1 PE=1 SV=2	1	13	13	13	9	8	11	11	10	9	10	9	8	11	11	10	9	10	9	8	11	11	10	9	10	41.4	41.4	41.4	46.44	418	418	0	125.16	3.489	1.6266	28.737	86	27	Leave out requantified	4.0485	3.8519	4.4887	4.1599
849	sp|P50502|F10A1_HUMAN;sp|Q8IZP2|ST134_HUMAN;sp|Q8NFI4|F10A5_HUMAN	sp|P50502|F10A1_HUMAN;sp|Q8IZP2|ST134_HUMAN;sp|Q8NFI4|F10A5_HUMAN	6;5;4	6;5;4	6;5;4	sp|P50502|F10A1_HUMAN Hsc70-interacting protein OS=Homo sapiens OX=9606 GN=ST13 PE=1 SV=2;sp|Q8IZP2|ST134_HUMAN Putative protein FAM10A4 OS=Homo sapiens OX=9606 GN=ST13P4 PE=5 SV=1;sp|Q8NFI4|F10A5_HUMAN Putative protein FAM10A5 OS=Homo sapiens OX=9606 GN=S	3	6	6	6	4	5	4	5	4	6	4	4	5	4	5	4	6	4	4	5	4	5	4	6	4	19.8	19.8	19.8	41.331	369	369;240;369	0	31.986	1.89	0.77692	17.098	32	0	Leave out requantified	2.1472	2.0989	2.03	1.8296
850	sp|P50552|VASP_HUMAN	sp|P50552|VASP_HUMAN	5	5	5	sp|P50552|VASP_HUMAN Vasodilator-stimulated phosphoprotein OS=Homo sapiens OX=9606 GN=VASP PE=1 SV=3	1	5	5	5	1	3	4	2	1	1	1	1	3	4	2	1	1	1	1	3	4	2	1	1	1	15	15	15	39.829	380	380	0	11.298	2.4803	1.1341	35.393	11	1	Leave out requantified	2.7083	2.4383	3.0133	2.1277
851	sp|P50570|DYN2_HUMAN;sp|Q05193|DYN1_HUMAN;sp|Q9UQ16|DYN3_HUMAN	sp|P50570|DYN2_HUMAN	18;3;3	18;3;3	18;3;3	sp|P50570|DYN2_HUMAN Dynamin-2 OS=Homo sapiens OX=9606 GN=DNM2 PE=1 SV=2	3	18	18	18	9	9	11	11	9	9	10	9	9	11	11	9	9	10	9	9	11	11	9	9	10	31.7	31.7	31.7	98.063	870	870;864;869	0	76.759	4.1484	1.5924	26.315	58	42	Leave out requantified	3.2188	3.8672	4.1403	1.3892
853	sp|P50914|RL14_HUMAN	sp|P50914|RL14_HUMAN	4	4	4	sp|P50914|RL14_HUMAN 60S ribosomal protein L14 OS=Homo sapiens OX=9606 GN=RPL14 PE=1 SV=4	1	4	4	4	3	4	3	3	3	3	3	3	4	3	3	3	3	3	3	4	3	3	3	3	3	19.1	19.1	19.1	23.432	215	215	0	18.101	7.1368	2.7517	11.276	29	8	Leave out requantified	7.6248	7.4886	8.4035	6.8016
854	sp|P50990|TCPQ_HUMAN	sp|P50990|TCPQ_HUMAN	34	34	34	sp|P50990|TCPQ_HUMAN T-complex protein 1 subunit theta OS=Homo sapiens OX=9606 GN=CCT8 PE=1 SV=4	1	34	34	34	25	33	22	25	23	29	23	25	33	22	25	23	29	23	25	33	22	25	23	29	23	68.6	68.6	68.6	59.62	548	548	0	190.87	3.0706	1.2796	14.981	215	46	Leave out requantified	3.2023	3.0903	3.5262	3.0312
855	sp|P50991|TCPD_HUMAN	sp|P50991|TCPD_HUMAN	28	28	28	sp|P50991|TCPD_HUMAN T-complex protein 1 subunit delta OS=Homo sapiens OX=9606 GN=CCT4 PE=1 SV=4	1	28	28	28	22	19	18	21	18	17	16	22	19	18	21	18	17	16	22	19	18	21	18	17	16	71.4	71.4	71.4	57.924	539	539	0	283.02	4.0675	1.516	31.142	135	68	Leave out requantified	4.1032	3.9657	4.2319	4.2688
856	sp|P50995|ANX11_HUMAN;sp|P27216|ANX13_HUMAN	sp|P50995|ANX11_HUMAN	18;1	18;1	18;1	sp|P50995|ANX11_HUMAN Annexin A11 OS=Homo sapiens OX=9606 GN=ANXA11 PE=1 SV=1	2	18	18	18	10	12	9	11	10	8	12	10	12	9	11	10	8	12	10	12	9	11	10	8	12	39	39	39	54.389	505	505;316	0	124.35	2.3966	1.138	30.247	80	26	Leave out requantified	3.0662	2.6801	2.581	2.8736
857	sp|P51114|FXR1_HUMAN	sp|P51114|FXR1_HUMAN	2	2	2	sp|P51114|FXR1_HUMAN Fragile X mental retardation syndrome-related protein 1 OS=Homo sapiens OX=9606 GN=FXR1 PE=1 SV=3	1	2	2	2	1	1	1	2	0	1	1	1	1	1	2	0	1	1	1	1	1	2	0	1	1	4.5	4.5	4.5	69.72	621	621	0.0028885	1.4893	1.905	0.88645	36.225	7	6	Median	1.8957	2.0402	1.8661	1.9257
859	sp|P51148|RAB5C_HUMAN	sp|P51148|RAB5C_HUMAN	10	10	7	sp|P51148|RAB5C_HUMAN Ras-related protein Rab-5C OS=Homo sapiens OX=9606 GN=RAB5C PE=1 SV=2	1	10	10	7	6	6	4	5	6	6	5	6	6	4	5	6	6	5	3	4	1	2	3	3	3	59.3	59.3	44.4	23.482	216	216	0	55.06	2.649	1.0138	40.258	38	16	Leave out requantified	2.8823	2.665	3.0111	3.0541
860	sp|P51149|RAB7A_HUMAN	sp|P51149|RAB7A_HUMAN	8	8	8	sp|P51149|RAB7A_HUMAN Ras-related protein Rab-7a OS=Homo sapiens OX=9606 GN=RAB7A PE=1 SV=1	1	8	8	8	3	5	4	4	6	6	3	3	5	4	4	6	6	3	3	5	4	4	6	6	3	47.8	47.8	47.8	23.489	207	207	0	49.136	2.591	1.0647	25.632	31	11	Leave out requantified	2.6414	2.4181	2.4952	2.5389
861	sp|P51571|SSRD_HUMAN	sp|P51571|SSRD_HUMAN	5	5	5	sp|P51571|SSRD_HUMAN Translocon-associated protein subunit delta OS=Homo sapiens OX=9606 GN=SSR4 PE=1 SV=1	1	5	5	5	3	3	3	3	4	4	4	3	3	3	3	4	4	4	3	3	3	3	4	4	4	36.4	36.4	36.4	18.998	173	173	0	17.968	2.2808	0.87911	18.588	26	2	Leave out requantified	2.111	2.2523	2.4588	2.3446
862	sp|P51572|BAP31_HUMAN	sp|P51572|BAP31_HUMAN	11	11	11	sp|P51572|BAP31_HUMAN B-cell receptor-associated protein 31 OS=Homo sapiens OX=9606 GN=BCAP31 PE=1 SV=3	1	11	11	11	11	8	10	9	10	7	8	11	8	10	9	10	7	8	11	8	10	9	10	7	8	41.5	41.5	41.5	27.991	246	246	0	55.696	1.8286	0.87761	17.651	90	7	Leave out requantified	1.8692	1.6596	2.0217	1.8504
863	sp|P51648|AL3A2_HUMAN	sp|P51648|AL3A2_HUMAN	3	3	3	sp|P51648|AL3A2_HUMAN Aldehyde dehydrogenase family 3 member A2 OS=Homo sapiens OX=9606 GN=ALDH3A2 PE=1 SV=1	1	3	3	3	3	1	2	2	1	2	1	3	1	2	2	1	2	1	3	1	2	2	1	2	1	7	7	7	54.847	485	485	0	4.1099	2.5989	1.3058	65.057	7	5	Median	2.1029		5.6366	4.9462
864	sp|P51659|DHB4_HUMAN	sp|P51659|DHB4_HUMAN	6	6	6	sp|P51659|DHB4_HUMAN Peroxisomal multifunctional enzyme type 2 OS=Homo sapiens OX=9606 GN=HSD17B4 PE=1 SV=3	1	6	6	6	3	1	1	2	2	4	3	3	1	1	2	2	4	3	3	1	1	2	2	4	3	9.5	9.5	9.5	79.685	736	736	0	10.7	3.6742	1.5759	13.017	15	5	Leave out requantified	1.4434	3.7232	0.44367	1.1337
865	sp|P51665|PSMD7_HUMAN	sp|P51665|PSMD7_HUMAN	12	12	12	sp|P51665|PSMD7_HUMAN 26S proteasome non-ATPase regulatory subunit 7 OS=Homo sapiens OX=9606 GN=PSMD7 PE=1 SV=2	1	12	12	12	8	11	9	10	9	9	8	8	11	9	10	9	9	8	8	11	9	10	9	9	8	48.5	48.5	48.5	37.025	324	324	0	119.81	2.4526	1.0406	10.891	86	24	Leave out requantified	2.4166	2.5923	2.5095	2.5919
866	sp|P51809|VAMP7_HUMAN	sp|P51809|VAMP7_HUMAN	3	3	3	sp|P51809|VAMP7_HUMAN Vesicle-associated membrane protein 7 OS=Homo sapiens OX=9606 GN=VAMP7 PE=1 SV=3	1	3	3	3	0	0	0	1	1	1	0	0	0	0	1	1	1	0	0	0	0	1	1	1	0	16.8	16.8	16.8	24.935	220	220	0	4.0454	1.5575	0.82308	70.251	3	2	Plateau				1.9233
867	sp|P51858|HDGF_HUMAN;sp|Q9Y3E1|HDGR3_HUMAN;sp|Q7Z4V5|HDGR2_HUMAN	sp|P51858|HDGF_HUMAN	6;1;1	6;1;1	5;0;0	sp|P51858|HDGF_HUMAN Hepatoma-derived growth factor OS=Homo sapiens OX=9606 GN=HDGF PE=1 SV=1	3	6	6	5	1	0	2	4	3	2	1	1	0	2	4	3	2	1	1	0	2	3	3	1	1	39.6	39.6	36.2	26.788	240	240;203;671	0	14.774	2.346	1.0656	42.107	13	7	Leave out requantified	0.54788		1.9945	1.8535
868	sp|P51965|UB2E1_HUMAN;sp|Q96LR5|UB2E2_HUMAN;sp|Q969T4|UB2E3_HUMAN	sp|P51965|UB2E1_HUMAN;sp|Q96LR5|UB2E2_HUMAN;sp|Q969T4|UB2E3_HUMAN	3;3;3	3;3;3	3;3;3	sp|P51965|UB2E1_HUMAN Ubiquitin-conjugating enzyme E2 E1 OS=Homo sapiens OX=9606 GN=UBE2E1 PE=1 SV=1;sp|Q96LR5|UB2E2_HUMAN Ubiquitin-conjugating enzyme E2 E2 OS=Homo sapiens OX=9606 GN=UBE2E2 PE=1 SV=1;sp|Q969T4|UB2E3_HUMAN Ubiquitin-conjugating enzyme E2	3	3	3	3	1	0	0	1	1	1	1	1	0	0	1	1	1	1	1	0	0	1	1	1	1	19.2	19.2	19.2	21.404	193	193;201;207	0	3.102	1.7511	0.79238	68.053	5	3	Median	1.4619			2.5576
869	sp|P51991|ROA3_HUMAN	sp|P51991|ROA3_HUMAN	20	19	19	sp|P51991|ROA3_HUMAN Heterogeneous nuclear ribonucleoprotein A3 OS=Homo sapiens OX=9606 GN=HNRNPA3 PE=1 SV=2	1	20	19	19	9	13	13	13	11	9	13	9	12	12	13	11	9	12	9	12	12	13	11	9	12	53.2	51.3	51.3	39.594	378	378	0	91.12	3.9082	1.849	36.63	91	49	Leave out requantified	2.7373	4.3248	5.5003	4.7529
870	sp|P52209|6PGD_HUMAN	sp|P52209|6PGD_HUMAN	22	22	22	sp|P52209|6PGD_HUMAN 6-phosphogluconate dehydrogenase, decarboxylating OS=Homo sapiens OX=9606 GN=PGD PE=1 SV=3	1	22	22	22	14	10	13	15	12	13	12	14	10	13	15	12	13	12	14	10	13	15	12	13	12	52	52	52	53.139	483	483	0	151.91	3.1308	1.2198	23.749	93	14	Leave out requantified	3.1549	3.0958	3.5395	3.359
871	sp|P52272|HNRPM_HUMAN	sp|P52272|HNRPM_HUMAN	34	34	34	sp|P52272|HNRPM_HUMAN Heterogeneous nuclear ribonucleoprotein M OS=Homo sapiens OX=9606 GN=HNRNPM PE=1 SV=3	1	34	34	34	20	19	16	15	20	21	19	20	19	16	15	20	21	19	20	19	16	15	20	21	19	55.2	55.2	55.2	77.515	730	730	0	109.37	4.4323	1.9436	32.289	127	59	Leave out requantified	4.0623	4.5048	5.229	4.7853
872	sp|P52292|IMA1_HUMAN	sp|P52292|IMA1_HUMAN	7	7	7	sp|P52292|IMA1_HUMAN Importin subunit alpha-1 OS=Homo sapiens OX=9606 GN=KPNA2 PE=1 SV=1	1	7	7	7	4	4	4	3	6	3	3	4	4	4	3	6	3	3	4	4	4	3	6	3	3	18.9	18.9	18.9	57.861	529	529	0	45.011	3.2437	1.4626	69.954	21	11	Leave out requantified	2.7302	4.3323	3.0577	4.3084
873	sp|P52306|GDS1_HUMAN	sp|P52306|GDS1_HUMAN	6	6	6	sp|P52306|GDS1_HUMAN Rap1 GTPase-GDP dissociation stimulator 1 OS=Homo sapiens OX=9606 GN=RAP1GDS1 PE=1 SV=3	1	6	6	6	2	2	3	2	2	3	2	2	2	3	2	2	3	2	2	2	3	2	2	3	2	12.7	12.7	12.7	66.316	607	607	0	7.621	1.7847	0.71911	18.63	15	4	Leave out requantified	1.6454	1.8364	1.8811	1.7942
874	sp|P52434|RPAB3_HUMAN	sp|P52434|RPAB3_HUMAN	3	3	3	sp|P52434|RPAB3_HUMAN DNA-directed RNA polymerases I, II, and III subunit RPABC3 OS=Homo sapiens OX=9606 GN=POLR2H PE=1 SV=4	1	3	3	3	2	2	2	2	2	2	3	2	2	2	2	2	2	3	2	2	2	2	2	2	3	27.3	27.3	27.3	17.143	150	150	0	8.1574	2.2222	0.93174	24.906	14	3	Leave out requantified	2.0146	2.4366	2.2251	2.0623
875	sp|P52565|GDIR1_HUMAN	sp|P52565|GDIR1_HUMAN	11	11	11	sp|P52565|GDIR1_HUMAN Rho GDP-dissociation inhibitor 1 OS=Homo sapiens OX=9606 GN=ARHGDIA PE=1 SV=3	1	11	11	11	10	9	11	10	9	9	8	10	9	11	10	9	9	8	10	9	11	10	9	9	8	59.3	59.3	59.3	23.207	204	204	0	197.21	1.8538	0.88526	45.177	127	15	Leave out requantified	1.9202	1.8302	2.0338	2.0235
876	sp|P52566|GDIR2_HUMAN	sp|P52566|GDIR2_HUMAN	9	9	9	sp|P52566|GDIR2_HUMAN Rho GDP-dissociation inhibitor 2 OS=Homo sapiens OX=9606 GN=ARHGDIB PE=1 SV=3	1	9	9	9	6	8	6	5	5	6	7	6	8	6	5	5	6	7	6	8	6	5	5	6	7	63.7	63.7	63.7	22.988	201	201	0	52.902	1.5695	0.64056	20.706	59	8	Leave out requantified	1.4532	1.3894	1.3835	1.5081
877	sp|P52597|HNRPF_HUMAN	sp|P52597|HNRPF_HUMAN	14	12	12	sp|P52597|HNRPF_HUMAN Heterogeneous nuclear ribonucleoprotein F OS=Homo sapiens OX=9606 GN=HNRNPF PE=1 SV=3	1	14	12	12	11	12	14	11	10	10	11	9	10	12	9	8	8	9	9	10	12	9	8	8	9	57.6	51.1	51.1	45.671	415	415	0	111.76	3.2486	1.6117	71.522	81	33	Leave out requantified	3.8002	3.7509	3.4668	4.0264
878	sp|P52701|MSH6_HUMAN	sp|P52701|MSH6_HUMAN	3	3	3	sp|P52701|MSH6_HUMAN DNA mismatch repair protein Msh6 OS=Homo sapiens OX=9606 GN=MSH6 PE=1 SV=2	1	3	3	3	3	0	1	1	0	2	2	3	0	1	1	0	2	2	3	0	1	1	0	2	2	3.3	3.3	3.3	152.78	1360	1360	0	13.607	2.2311	0.96909	28.309	7	7	Median	2.1343		1.8476	2.2456
880	sp|P52788|SPSY_HUMAN	sp|P52788|SPSY_HUMAN	16	16	16	sp|P52788|SPSY_HUMAN Spermine synthase OS=Homo sapiens OX=9606 GN=SMS PE=1 SV=2	1	16	16	16	12	13	12	13	13	15	11	12	13	12	13	13	15	11	12	13	12	13	13	15	11	65.6	65.6	65.6	41.268	366	366	0	318.17	1.8224	0.90341	32.513	107	21	Leave out requantified	1.8867	1.8361	2.1029	1.8486
881	sp|P52789|HXK2_HUMAN;sp|P52790|HXK3_HUMAN	sp|P52789|HXK2_HUMAN	9;3	5;1	5;1	sp|P52789|HXK2_HUMAN Hexokinase-2 OS=Homo sapiens OX=9606 GN=HK2 PE=1 SV=2	2	9	5	5	6	6	4	3	2	5	4	3	2	1	0	1	1	1	3	2	1	0	1	1	1	11.7	7.5	7.5	102.38	917	917;923	0	8.0127	1.5691	0.64097	38.25	8	5	Median	1.6305	1.4044
882	sp|P52888|THOP1_HUMAN	sp|P52888|THOP1_HUMAN	8	8	8	sp|P52888|THOP1_HUMAN Thimet oligopeptidase OS=Homo sapiens OX=9606 GN=THOP1 PE=1 SV=2	1	8	8	8	1	2	3	3	4	5	2	1	2	3	3	4	5	2	1	2	3	3	4	5	2	14.5	14.5	14.5	78.839	689	689	0	9.3699	1.8026	0.78041	24.215	20	9	Leave out requantified	1.6134	2.1114	2.5643	2.266
883	sp|P52907|CAZA1_HUMAN	sp|P52907|CAZA1_HUMAN	14	14	12	sp|P52907|CAZA1_HUMAN F-actin-capping protein subunit alpha-1 OS=Homo sapiens OX=9606 GN=CAPZA1 PE=1 SV=3	1	14	14	12	10	12	12	11	11	11	10	10	12	12	11	11	11	10	8	10	10	9	10	9	8	72	72	66.1	32.922	286	286	0	138.88	2.0649	0.83784	28.892	88	30	Leave out requantified	2.0283	1.7406	2.0414	2.0955
884	sp|P53004|BIEA_HUMAN	sp|P53004|BIEA_HUMAN	11	11	11	sp|P53004|BIEA_HUMAN Biliverdin reductase A OS=Homo sapiens OX=9606 GN=BLVRA PE=1 SV=2	1	11	11	11	5	6	4	5	8	7	6	5	6	4	5	8	7	6	5	6	4	5	8	7	6	43.9	43.9	43.9	33.428	296	296	0	26.305	2.9219	1.1033	14.411	38	19	Leave out requantified	2.973	1.9853	3.1621	2.9839
885	sp|P53007|TXTP_HUMAN	sp|P53007|TXTP_HUMAN	6	6	6	sp|P53007|TXTP_HUMAN Tricarboxylate transport protein, mitochondrial OS=Homo sapiens OX=9606 GN=SLC25A1 PE=1 SV=2	1	6	6	6	3	4	4	2	3	3	4	3	4	4	2	3	3	4	3	4	4	2	3	3	4	23.8	23.8	23.8	34.012	311	311	0	12.457	3.1437	1.2371	19.203	22	9	Leave out requantified	3.4979	3.6163	3.7207	3.6838
886	sp|P53041|PPP5_HUMAN;sp|E7EU14|PP5D1_HUMAN	sp|P53041|PPP5_HUMAN	9;1	9;1	9;1	sp|P53041|PPP5_HUMAN Serine/threonine-protein phosphatase 5 OS=Homo sapiens OX=9606 GN=PPP5C PE=1 SV=1	2	9	9	9	4	3	4	3	4	6	3	4	3	4	3	4	6	3	4	3	4	3	4	6	3	21.6	21.6	21.6	56.878	499	499;171	0	45.022	2.0863	0.92792	23.579	30	13	Leave out requantified	1.8968	1.7356	2.4126	2.0004
887	sp|P53396|ACLY_HUMAN	sp|P53396|ACLY_HUMAN	42	42	42	sp|P53396|ACLY_HUMAN ATP-citrate synthase OS=Homo sapiens OX=9606 GN=ACLY PE=1 SV=3	1	42	42	42	30	29	29	29	28	30	29	30	29	29	29	28	30	29	30	29	29	29	28	30	29	48.4	48.4	48.4	120.84	1101	1101	0	247.52	3.9547	1.7982	31.109	228	100	Leave out requantified	3.9748	3.9009	5.2291	4.405
889	sp|P53597|SUCA_HUMAN	sp|P53597|SUCA_HUMAN	2	2	2	sp|P53597|SUCA_HUMAN Succinate--CoA ligase [ADP/GDP-forming] subunit alpha, mitochondrial OS=Homo sapiens OX=9606 GN=SUCLG1 PE=1 SV=4	1	2	2	2	1	1	1	2	2	1	2	1	1	1	2	2	1	2	1	1	1	2	2	1	2	7.2	7.2	7.2	36.249	346	346	0	5.8514	0.16872	0.067254	132.17	10	10	Median	0.17017	0.16729	0.12939	0.52013
890	sp|P53618|COPB_HUMAN	sp|P53618|COPB_HUMAN	23	23	23	sp|P53618|COPB_HUMAN Coatomer subunit beta OS=Homo sapiens OX=9606 GN=COPB1 PE=1 SV=3	1	23	23	23	20	19	18	15	15	16	17	20	19	18	15	15	16	17	20	19	18	15	15	16	17	31.9	31.9	31.9	107.14	953	953	0	128.18	4.2698	1.7879	48.406	134	65	Leave out requantified	3.9244	4.5146	4.1945	5.0022
891	sp|P53621|COPA_HUMAN	sp|P53621|COPA_HUMAN	25	25	25	sp|P53621|COPA_HUMAN Coatomer subunit alpha OS=Homo sapiens OX=9606 GN=COPA PE=1 SV=2	1	25	25	25	13	16	15	13	9	11	13	13	16	15	13	9	11	13	13	16	15	13	9	11	13	26.2	26.2	26.2	138.34	1224	1224	0	103.26	5.1295	2.0414	26.344	89	59	Leave out requantified	5.8623	5.2766	6.7608	7.6712
892	sp|P53634|CATC_HUMAN	sp|P53634|CATC_HUMAN	5	5	5	sp|P53634|CATC_HUMAN Dipeptidyl peptidase 1 OS=Homo sapiens OX=9606 GN=CTSC PE=1 SV=2	1	5	5	5	2	2	2	3	1	2	1	2	2	2	3	1	2	1	2	2	2	3	1	2	1	14.5	14.5	14.5	51.853	463	463	0	8.0239	0.9917	0.43554	12.806	13	0	Leave out requantified	0.95464	1.0009	1.215	1.0674
893	sp|P53675|CLH2_HUMAN	sp|P53675|CLH2_HUMAN	17	1	1	sp|P53675|CLH2_HUMAN Clathrin heavy chain 2 OS=Homo sapiens OX=9606 GN=CLTCL1 PE=1 SV=2	1	17	1	1	13	13	9	13	14	13	12	1	1	0	0	1	1	1	1	1	0	0	1	1	1	10.3	0.7	0.7	187.03	1640	1640	0	4.7659	3.0892	1.4653	13.11	6	5	Median	3.2095	2.9057
894	sp|P53680|AP2S1_HUMAN	sp|P53680|AP2S1_HUMAN	2	2	2	sp|P53680|AP2S1_HUMAN AP-2 complex subunit sigma OS=Homo sapiens OX=9606 GN=AP2S1 PE=1 SV=2	1	2	2	2	0	1	1	0	1	2	1	0	1	1	0	1	2	1	0	1	1	0	1	2	1	13.4	13.4	13.4	17.018	142	142	0	3.748	3.9345	1.5347	23.903	6	3	Median		4.9124	4.5672
895	sp|P53801|PTTG_HUMAN	sp|P53801|PTTG_HUMAN	2	2	2	sp|P53801|PTTG_HUMAN Pituitary tumor-transforming gene 1 protein-interacting protein OS=Homo sapiens OX=9606 GN=PTTG1IP PE=1 SV=1	1	2	2	2	1	2	2	2	1	1	1	1	2	2	2	1	1	1	1	2	2	2	1	1	1	16.7	16.7	16.7	20.324	180	180	0	12.783	1.1034	0.47663	40.473	10	2	Leave out requantified	0.88148	0.89116	1.2361	1.3928
896	sp|P53992|SC24C_HUMAN	sp|P53992|SC24C_HUMAN	5	5	5	sp|P53992|SC24C_HUMAN Protein transport protein Sec24C OS=Homo sapiens OX=9606 GN=SEC24C PE=1 SV=3	1	5	5	5	1	2	1	3	3	1	3	1	2	1	3	3	1	3	1	2	1	3	3	1	3	5.9	5.9	5.9	118.32	1094	1094	0	10.156	2.7869	1.1758	9.6163	13	6	Leave out requantified	3.1828	2.5027	3.3964	1.9017
897	sp|P54105|ICLN_HUMAN	sp|P54105|ICLN_HUMAN	2	2	2	sp|P54105|ICLN_HUMAN Methylosome subunit pICln OS=Homo sapiens OX=9606 GN=CLNS1A PE=1 SV=1	1	2	2	2	1	1	0	0	1	1	1	1	1	0	0	1	1	1	1	1	0	0	1	1	1	10.5	10.5	10.5	26.215	237	237	0	2.1564	1.575	0.65656	10.188	5	1	Median	1.28	1.7819
898	sp|P54136|SYRC_HUMAN	sp|P54136|SYRC_HUMAN	21	21	21	sp|P54136|SYRC_HUMAN Arginine--tRNA ligase, cytoplasmic OS=Homo sapiens OX=9606 GN=RARS1 PE=1 SV=2	1	21	21	21	3	10	7	7	7	6	9	3	10	7	7	7	6	9	3	10	7	7	7	6	9	36.8	36.8	36.8	75.378	660	660	0	42.503	3.1127	1.2652	78.154	45	25	Leave out requantified	1.5942	2.7674	2.5704	3.2187
899	sp|P54577|SYYC_HUMAN	sp|P54577|SYYC_HUMAN	11	11	11	sp|P54577|SYYC_HUMAN Tyrosine--tRNA ligase, cytoplasmic OS=Homo sapiens OX=9606 GN=YARS1 PE=1 SV=4	1	11	11	11	6	6	8	5	9	6	7	6	6	8	5	9	6	7	6	6	8	5	9	6	7	28.4	28.4	28.4	59.143	528	528	0	49.511	2.289	1.0008	29.287	51	18	Leave out requantified	2.1242	2.1737	3.0443	2.3503
900	sp|P54578|UBP14_HUMAN	sp|P54578|UBP14_HUMAN	16	16	16	sp|P54578|UBP14_HUMAN Ubiquitin carboxyl-terminal hydrolase 14 OS=Homo sapiens OX=9606 GN=USP14 PE=1 SV=3	1	16	16	16	8	8	9	8	10	11	12	8	8	9	8	10	11	12	8	8	9	8	10	11	12	44.1	44.1	44.1	56.068	494	494	0	91.645	1.5446	0.67645	18.71	74	19	Leave out requantified	1.7633	1.5656	1.737	1.8249
902	sp|P54709|AT1B3_HUMAN	sp|P54709|AT1B3_HUMAN	2	2	2	sp|P54709|AT1B3_HUMAN Sodium/potassium-transporting ATPase subunit beta-3 OS=Homo sapiens OX=9606 GN=ATP1B3 PE=1 SV=1	1	2	2	2	2	1	1	1	0	0	2	2	1	1	1	0	0	2	2	1	1	1	0	0	2	10.4	10.4	10.4	31.512	279	279	0	5.102	1.9411	0.82424	10.916	7	1	Leave out requantified	1.9411	2.3334	2.2472	1.9734
903	sp|P54727|RD23B_HUMAN;sp|P54725|RD23A_HUMAN	sp|P54727|RD23B_HUMAN	3;1	3;1	3;1	sp|P54727|RD23B_HUMAN UV excision repair protein RAD23 homolog B OS=Homo sapiens OX=9606 GN=RAD23B PE=1 SV=1	2	3	3	3	2	2	1	1	1	2	2	2	2	1	1	1	2	2	2	2	1	1	1	2	2	6.1	6.1	6.1	43.171	409	409;363	0	2.4438	0.79726	0.34095	70.678	9	8	Median	1.1949	0.60003	0.77606	0.79726
905	sp|P54886|P5CS_HUMAN	sp|P54886|P5CS_HUMAN	8	8	8	sp|P54886|P5CS_HUMAN Delta-1-pyrroline-5-carboxylate synthase OS=Homo sapiens OX=9606 GN=ALDH18A1 PE=1 SV=2	1	8	8	8	3	5	2	2	6	4	2	3	5	2	2	6	4	2	3	5	2	2	6	4	2	10.9	10.9	10.9	87.301	795	795	0	15.54	2.5829	1.098	95.94	20	18	Median	1.655	5.3723	2.0524	2.1612
906	sp|P54920|SNAA_HUMAN;sp|Q9H115|SNAB_HUMAN	sp|P54920|SNAA_HUMAN	7;1	7;1	7;1	sp|P54920|SNAA_HUMAN Alpha-soluble NSF attachment protein OS=Homo sapiens OX=9606 GN=NAPA PE=1 SV=3	2	7	7	7	4	4	5	2	4	2	4	4	4	5	2	4	2	4	4	4	5	2	4	2	4	32.2	32.2	32.2	33.232	295	295;298	0	21.524	2.3488	1.0054	21.287	24	11	Leave out requantified	2.032	2.0896	2.3527	1.8821
907	sp|P55010|IF5_HUMAN	sp|P55010|IF5_HUMAN	6	6	6	sp|P55010|IF5_HUMAN Eukaryotic translation initiation factor 5 OS=Homo sapiens OX=9606 GN=EIF5 PE=1 SV=2	1	6	6	6	2	3	3	2	1	2	1	2	3	3	2	1	2	1	2	3	3	2	1	2	1	18.1	18.1	18.1	49.222	431	431	0	8.3952	2.3452	0.94094	27.953	13	4	Leave out requantified	2.2064	2.4893	2.8019	2.7459
908	sp|P55036|PSMD4_HUMAN;sp|A2A3N6|PIPSL_HUMAN	sp|P55036|PSMD4_HUMAN	10;4	10;4	10;4	sp|P55036|PSMD4_HUMAN 26S proteasome non-ATPase regulatory subunit 4 OS=Homo sapiens OX=9606 GN=PSMD4 PE=1 SV=1	2	10	10	10	3	6	7	6	4	6	7	3	6	7	6	4	6	7	3	6	7	6	4	6	7	34	34	34	40.736	377	377;862	0	42.61	1.9453	0.90537	37.882	40	12	Leave out requantified	1.8422	1.9515	2.1119	1.8969
909	sp|P55039|DRG2_HUMAN	sp|P55039|DRG2_HUMAN	1	1	1	sp|P55039|DRG2_HUMAN Developmentally-regulated GTP-binding protein 2 OS=Homo sapiens OX=9606 GN=DRG2 PE=1 SV=1	1	1	1	1	1	0	0	1	1	0	1	1	0	0	1	1	0	1	1	0	0	1	1	0	1	2.5	2.5	2.5	40.746	364	364	0.00059737	1.8034	1.1227	0.49091	50.951	3	3	Median	1.1227
910	sp|P55060|XPO2_HUMAN	sp|P55060|XPO2_HUMAN	35	35	35	sp|P55060|XPO2_HUMAN Exportin-2 OS=Homo sapiens OX=9606 GN=CSE1L PE=1 SV=3	1	35	35	35	29	17	22	16	19	20	25	29	17	22	16	19	20	25	29	17	22	16	19	20	25	43.3	43.3	43.3	110.42	971	971	0	268.44	3.7322	1.6342	22.168	143	68	Leave out requantified	3.7446	3.9134	4.6601	3.3517
911	sp|P55072|TERA_HUMAN	sp|P55072|TERA_HUMAN	44	44	44	sp|P55072|TERA_HUMAN Transitional endoplasmic reticulum ATPase OS=Homo sapiens OX=9606 GN=VCP PE=1 SV=4	1	44	44	44	36	36	35	39	33	36	29	36	36	35	39	33	36	29	36	36	35	39	33	36	29	56.5	56.5	56.5	89.321	806	806	0	323.31	3.1104	1.2757	30.188	335	86	Leave out requantified	3.1693	3.1379	3.6057	3.2885
912	sp|P55084|ECHB_HUMAN	sp|P55084|ECHB_HUMAN	9	9	9	sp|P55084|ECHB_HUMAN Trifunctional enzyme subunit beta, mitochondrial OS=Homo sapiens OX=9606 GN=HADHB PE=1 SV=3	1	9	9	9	5	6	5	4	5	7	4	5	6	5	4	5	7	4	5	6	5	4	5	7	4	28.5	28.5	28.5	51.294	474	474	0	25.168	3.548	1.4813	9.2157	34	27	Leave out requantified	3.3327	4.1244	2.8157	3.0732
914	sp|P55209|NP1L1_HUMAN	sp|P55209|NP1L1_HUMAN	15	15	13	sp|P55209|NP1L1_HUMAN Nucleosome assembly protein 1-like 1 OS=Homo sapiens OX=9606 GN=NAP1L1 PE=1 SV=1	1	15	15	13	11	12	11	14	11	11	11	11	12	11	14	11	11	11	10	11	10	12	10	10	10	52.9	52.9	50.4	45.374	391	391	0	311.9	2.0155	0.96993	42.621	123	26	Leave out requantified	2.1061	1.9953	2.405	2.0933
915	sp|P55212|CASP6_HUMAN	sp|P55212|CASP6_HUMAN	2	2	2	sp|P55212|CASP6_HUMAN Caspase-6 OS=Homo sapiens OX=9606 GN=CASP6 PE=1 SV=2	1	2	2	2	0	1	0	1	1	1	0	0	1	0	1	1	1	0	0	1	0	1	1	1	0	7.2	7.2	7.2	33.31	293	293	0	2.9635	2.5369	1.1787	26.745	4	1	Median		2.7577		2.1556
916	sp|P55263|ADK_HUMAN	sp|P55263|ADK_HUMAN	4	4	4	sp|P55263|ADK_HUMAN Adenosine kinase OS=Homo sapiens OX=9606 GN=ADK PE=1 SV=2	1	4	4	4	1	2	3	2	1	1	3	1	2	3	2	1	1	3	1	2	3	2	1	1	3	19.3	19.3	19.3	40.545	362	362	0	10.441	2.3841	1.0016	46.481	16	6	Leave out requantified	2.4022	2.1918	2.4949	1.8546
917	sp|P55735|SEC13_HUMAN	sp|P55735|SEC13_HUMAN	6	6	6	sp|P55735|SEC13_HUMAN Protein SEC13 homolog OS=Homo sapiens OX=9606 GN=SEC13 PE=1 SV=3	1	6	6	6	2	4	2	1	3	4	3	2	4	2	1	3	4	3	2	4	2	1	3	4	3	31.1	31.1	31.1	35.54	322	322	0	47.683	2.218	1.07	35.04	20	7	Leave out requantified	2.0539	2.1286	1.9261	1.5436
918	sp|P55769|NH2L1_HUMAN	sp|P55769|NH2L1_HUMAN	2	2	2	sp|P55769|NH2L1_HUMAN NHP2-like protein 1 OS=Homo sapiens OX=9606 GN=SNU13 PE=1 SV=3	1	2	2	2	1	1	2	1	1	1	1	1	1	2	1	1	1	1	1	1	2	1	1	1	1	18.8	18.8	18.8	14.173	128	128	0	8.4409	1.5893	0.71456	59.088	8	5	Median	1.6605	1.5211	3.8897	1.2918
919	sp|P55786|PSA_HUMAN;sp|A6NEC2|PSAL_HUMAN	sp|P55786|PSA_HUMAN	23;8	23;8	23;8	sp|P55786|PSA_HUMAN Puromycin-sensitive aminopeptidase OS=Homo sapiens OX=9606 GN=NPEPPS PE=1 SV=2	2	23	23	23	10	16	10	12	12	17	12	10	16	10	12	12	17	12	10	16	10	12	12	17	12	32.6	32.6	32.6	103.28	919	919;478	0	75.187	1.7713	0.7268	31.425	82	30	Leave out requantified	1.713	1.8075	1.8309	1.8005
920	sp|P55795|HNRH2_HUMAN	sp|P55795|HNRH2_HUMAN	11	4	4	sp|P55795|HNRH2_HUMAN Heterogeneous nuclear ribonucleoprotein H2 OS=Homo sapiens OX=9606 GN=HNRNPH2 PE=1 SV=1	1	11	4	4	6	8	7	4	5	5	7	1	2	3	0	1	1	1	1	2	3	0	1	1	1	33.2	15.6	15.6	49.263	449	449	0	7.6258	1.5941	0.68723	28.35	6	6	Median	0.85553		1.8607
921	sp|P55884|EIF3B_HUMAN	sp|P55884|EIF3B_HUMAN	22	22	22	sp|P55884|EIF3B_HUMAN Eukaryotic translation initiation factor 3 subunit B OS=Homo sapiens OX=9606 GN=EIF3B PE=1 SV=3	1	22	22	22	15	13	14	14	17	14	13	15	13	14	14	17	14	13	15	13	14	14	17	14	13	33.3	33.3	33.3	92.48	814	814	0	84.953	2.7106	1.1788	30.258	103	28	Leave out requantified	2.893	2.8116	3.2443	2.934
922	sp|P56134|ATPK_HUMAN	sp|P56134|ATPK_HUMAN	2	2	2	sp|P56134|ATPK_HUMAN ATP synthase subunit f, mitochondrial OS=Homo sapiens OX=9606 GN=ATP5MF PE=1 SV=3	1	2	2	2	1	1	2	1	1	1	0	1	1	2	1	1	1	0	1	1	2	1	1	1	0	25.5	25.5	25.5	10.918	94	94	0	5.922	2.9924	1.1035	36.766	7	2	Leave out requantified	4.6384	3.587	3.2915	2.1952
923	sp|P56192|SYMC_HUMAN	sp|P56192|SYMC_HUMAN	9	9	9	sp|P56192|SYMC_HUMAN Methionine--tRNA ligase, cytoplasmic OS=Homo sapiens OX=9606 GN=MARS1 PE=1 SV=2	1	9	9	9	2	5	3	3	2	3	5	2	5	3	3	2	3	5	2	5	3	3	2	3	5	14.4	14.4	14.4	101.11	900	900	0	49.051	11.939	6.6249	98.577	20	13	Linear	3.0716	2.0148	0.47783	3.0801
924	sp|P56537|IF6_HUMAN	sp|P56537|IF6_HUMAN	8	8	8	sp|P56537|IF6_HUMAN Eukaryotic translation initiation factor 6 OS=Homo sapiens OX=9606 GN=EIF6 PE=1 SV=1	1	8	8	8	6	8	6	8	7	7	7	6	8	6	8	7	7	7	6	8	6	8	7	7	7	60	60	60	26.599	245	245	0	169.2	2.1789	0.86568	17.425	56	17	Leave out requantified	2.3078	2.0079	2.3904	2.4429
925	sp|P56545|CTBP2_HUMAN	sp|P56545|CTBP2_HUMAN	6	3	3	sp|P56545|CTBP2_HUMAN C-terminal-binding protein 2 OS=Homo sapiens OX=9606 GN=CTBP2 PE=1 SV=1	1	6	3	3	3	2	3	4	3	2	2	1	0	1	2	1	0	0	1	0	1	2	1	0	0	13.9	8.5	8.5	48.944	445	445	0	2.8334	2.5607	0.97254	30.887	4	4	Median	2.2147		2.761	4.0953
926	sp|P57088|TMM33_HUMAN	sp|P57088|TMM33_HUMAN	3	3	3	sp|P57088|TMM33_HUMAN Transmembrane protein 33 OS=Homo sapiens OX=9606 GN=TMEM33 PE=1 SV=2	1	3	3	3	3	3	2	3	3	2	3	3	3	2	3	3	2	3	3	3	2	3	3	2	3	12.1	12.1	12.1	27.978	247	247	0	16.816	2.8808	1.216	14.354	19	0	Leave out requantified	2.9906	2.7525	3.6736	2.8808
928	sp|P58546|MTPN_HUMAN	sp|P58546|MTPN_HUMAN	2	2	2	sp|P58546|MTPN_HUMAN Myotrophin OS=Homo sapiens OX=9606 GN=MTPN PE=1 SV=2	1	2	2	2	0	2	1	2	2	2	1	0	2	1	2	2	2	1	0	2	1	2	2	2	1	32.2	32.2	32.2	12.895	118	118	0	42.241	2.0152	0.91892	9.8173	12	4	Leave out requantified		1.1384	1.9805	2.0055
929	sp|P59998|ARPC4_HUMAN	sp|P59998|ARPC4_HUMAN	9	9	9	sp|P59998|ARPC4_HUMAN Actin-related protein 2/3 complex subunit 4 OS=Homo sapiens OX=9606 GN=ARPC4 PE=1 SV=3	1	9	9	9	8	4	6	6	8	5	6	8	4	6	6	8	5	6	8	4	6	6	8	5	6	60.1	60.1	60.1	19.667	168	168	0	43.801	2.8733	1.1659	30.093	41	8	Leave out requantified	2.8861	2.9894	3.1814	2.8524
930	sp|P60033|CD81_HUMAN	sp|P60033|CD81_HUMAN	3	3	3	sp|P60033|CD81_HUMAN CD81 antigen OS=Homo sapiens OX=9606 GN=CD81 PE=1 SV=1	1	3	3	3	2	2	2	3	2	1	2	2	2	2	3	2	1	2	2	2	2	3	2	1	2	25	25	25	25.809	236	236	0	71.077	1.7202	0.6732	32.556	19	2	Leave out requantified	1.8486	1.5059	1.6728	1.7732
931	sp|P60174|TPIS_HUMAN	sp|P60174|TPIS_HUMAN	24	24	24	sp|P60174|TPIS_HUMAN Triosephosphate isomerase OS=Homo sapiens OX=9606 GN=TPI1 PE=1 SV=4	1	24	24	24	16	21	19	22	20	18	17	16	21	19	22	20	18	17	16	21	19	22	20	18	17	91.6	91.6	91.6	26.669	249	249	0	301.51	2.987	1.3185	21.01	221	52	Leave out requantified	2.9304	2.9853	3.2952	3.2594
932	sp|P60228|EIF3E_HUMAN	sp|P60228|EIF3E_HUMAN	15	15	15	sp|P60228|EIF3E_HUMAN Eukaryotic translation initiation factor 3 subunit E OS=Homo sapiens OX=9606 GN=EIF3E PE=1 SV=1	1	15	15	15	5	6	8	9	10	10	12	5	6	8	9	10	10	12	5	6	8	9	10	10	12	38.7	38.7	38.7	52.22	445	445	0	46.592	3.9168	1.6527	13.662	56	21	Leave out requantified	3.9168	4.8031	4.9192	4.9049
933	sp|P60468|SC61B_HUMAN	sp|P60468|SC61B_HUMAN	2	2	2	sp|P60468|SC61B_HUMAN Protein transport protein Sec61 subunit beta OS=Homo sapiens OX=9606 GN=SEC61B PE=1 SV=2	1	2	2	2	0	1	1	1	1	2	1	0	1	1	1	1	2	1	0	1	1	1	1	2	1	26	26	26	9.9743	96	96	0	2.5267	1.9632	0.89982	3.803	7	0	Leave out requantified		2.0368	2.9319	2.8472
934	sp|P60510|PP4C_HUMAN	sp|P60510|PP4C_HUMAN	5	3	3	sp|P60510|PP4C_HUMAN Serine/threonine-protein phosphatase 4 catalytic subunit OS=Homo sapiens OX=9606 GN=PPP4C PE=1 SV=1	1	5	3	3	2	2	3	2	4	1	2	1	1	2	1	3	1	1	1	1	2	1	3	1	1	23.5	18.6	18.6	35.08	307	307	0	23.47	1.7843	0.69289	22.594	10	2	Leave out requantified	2.153	2.0769	1.5442	2.0712
935	sp|P60660|MYL6_HUMAN;sp|P14649|MYL6B_HUMAN	sp|P60660|MYL6_HUMAN	8;2	8;2	8;2	sp|P60660|MYL6_HUMAN Myosin light polypeptide 6 OS=Homo sapiens OX=9606 GN=MYL6 PE=1 SV=2	2	8	8	8	6	5	6	6	6	8	4	6	5	6	6	6	8	4	6	5	6	6	6	8	4	58.9	58.9	58.9	16.93	151	151;208	0	68.304	2.9281	1.1648	17.325	55	16	Leave out requantified	3.0124	2.9985	3.227	3.143
936	sp|P60709|ACTB_HUMAN;sp|Q562R1|ACTBL_HUMAN;sp|Q9BYX7|ACTBM_HUMAN	sp|P60709|ACTB_HUMAN	37;8;4	1;0;0	1;0;0	sp|P60709|ACTB_HUMAN Actin, cytoplasmic 1 OS=Homo sapiens OX=9606 GN=ACTB PE=1 SV=1	3	37	1	1	26	28	29	33	28	29	27	1	1	1	1	1	1	1	1	1	1	1	1	1	1	78.4	4.5	4.5	41.736	375	375;376;375	0	50.164	5.4121	3.8456	20.07	14	0	Linear	5.4121	5.2625	6.217	5.5372
937	sp|P60842|IF4A1_HUMAN	sp|P60842|IF4A1_HUMAN	26	26	13	sp|P60842|IF4A1_HUMAN Eukaryotic initiation factor 4A-I OS=Homo sapiens OX=9606 GN=EIF4A1 PE=1 SV=1	1	26	26	13	22	22	22	20	21	20	20	22	22	22	20	21	20	20	12	11	11	9	10	11	11	59.4	59.4	30.8	46.153	406	406	0	273.45	4.3217	1.9944	29.312	233	89	Leave out requantified	4.7218	4.4744	5.4132	5.1134
938	sp|P60866|RS20_HUMAN	sp|P60866|RS20_HUMAN	4	4	4	sp|P60866|RS20_HUMAN 40S ribosomal protein S20 OS=Homo sapiens OX=9606 GN=RPS20 PE=1 SV=1	1	4	4	4	3	4	3	3	3	3	4	3	4	3	3	3	3	4	3	4	3	3	3	3	4	28.6	28.6	28.6	13.373	119	119	0	29.383	3.107	1.4309	15.251	34	1	Leave out requantified	3.2392	3.6726	3.9576	3.6378
939	sp|P60891|PRPS1_HUMAN;sp|P21108|PRPS3_HUMAN	sp|P60891|PRPS1_HUMAN	8;2	8;2	4;1	sp|P60891|PRPS1_HUMAN Ribose-phosphate pyrophosphokinase 1 OS=Homo sapiens OX=9606 GN=PRPS1 PE=1 SV=2	2	8	8	4	4	4	6	4	4	6	5	4	4	6	4	4	6	5	2	2	3	1	2	4	3	31.1	31.1	16	34.834	318	318;318	0	38.528	3.0618	1.2897	10.557	34	10	Leave out requantified	3.0372	3.1309	3.2341	3.3993
940	sp|P60900|PSA6_HUMAN	sp|P60900|PSA6_HUMAN	13	13	13	sp|P60900|PSA6_HUMAN Proteasome subunit alpha type-6 OS=Homo sapiens OX=9606 GN=PSMA6 PE=1 SV=1	1	13	13	13	10	8	8	8	11	8	9	10	8	8	8	11	8	9	10	8	8	8	11	8	9	62.2	62.2	62.2	27.399	246	246	0	99.509	2.4283	0.98353	14.748	70	11	Leave out requantified	2.4075	2.4077	2.5237	2.415
941	sp|P60903|S10AA_HUMAN	sp|P60903|S10AA_HUMAN	3	3	3	sp|P60903|S10AA_HUMAN Protein S100-A10 OS=Homo sapiens OX=9606 GN=S100A10 PE=1 SV=2	1	3	3	3	2	3	3	3	2	3	2	2	3	3	3	2	3	2	2	3	3	3	2	3	2	45.4	45.4	45.4	11.203	97	97	0	20.24	2.0169	1.0282	14.02	33	6	Leave out requantified	2.022	2.0854	2.0945	1.8938
942	sp|P60953|CDC42_HUMAN;sp|P17081|RHOQ_HUMAN;sp|Q9H4E5|RHOJ_HUMAN	sp|P60953|CDC42_HUMAN	8;1;1	8;1;1	7;0;0	sp|P60953|CDC42_HUMAN Cell division control protein 42 homolog OS=Homo sapiens OX=9606 GN=CDC42 PE=1 SV=2	3	8	8	7	5	7	5	5	5	7	8	5	7	5	5	5	7	8	5	6	5	4	4	6	7	42.4	42.4	36.6	21.258	191	191;205;214	0	41.308	2.0457	1.0308	21.312	47	10	Leave out requantified	2.0289	2.9357	2.1747	2.2612
943	sp|P60981|DEST_HUMAN	sp|P60981|DEST_HUMAN	13	12	12	sp|P60981|DEST_HUMAN Destrin OS=Homo sapiens OX=9606 GN=DSTN PE=1 SV=3	1	13	12	12	10	11	9	8	7	8	7	9	10	8	7	6	7	6	9	10	8	7	6	7	6	70.9	66.7	66.7	18.506	165	165	0	43.82	2.4386	1.1636	36.494	53	10	Leave out requantified	2.6792	2.3796	2.7645	2.9402
944	sp|P60983|GMFB_HUMAN;sp|O60234|GMFG_HUMAN	sp|P60983|GMFB_HUMAN	4;1	4;1	4;1	sp|P60983|GMFB_HUMAN Glia maturation factor beta OS=Homo sapiens OX=9606 GN=GMFB PE=1 SV=2	2	4	4	4	2	3	2	2	1	2	2	2	3	2	2	1	2	2	2	3	2	2	1	2	2	29.6	29.6	29.6	16.713	142	142;142	0	28.959	1.9448	0.95459	18.188	13	5	Leave out requantified	2.0561	1.981	2.1987	0.25731
945	sp|P61006|RAB8A_HUMAN;sp|Q92930|RAB8B_HUMAN;sp|P51153|RAB13_HUMAN;sp|P20337|RAB3B_HUMAN;sp|O95716|RAB3D_HUMAN;sp|P20336|RAB3A_HUMAN;sp|Q96E17|RAB3C_HUMAN	sp|P61006|RAB8A_HUMAN;sp|Q92930|RAB8B_HUMAN	8;5;2;1;1;1;1	6;3;1;1;1;1;1	6;3;1;1;1;1;1	sp|P61006|RAB8A_HUMAN Ras-related protein Rab-8A OS=Homo sapiens OX=9606 GN=RAB8A PE=1 SV=1;sp|Q92930|RAB8B_HUMAN Ras-related protein Rab-8B OS=Homo sapiens OX=9606 GN=RAB8B PE=1 SV=2	7	8	6	6	2	5	3	3	3	4	3	1	3	2	2	2	2	2	1	3	2	2	2	2	2	36.2	30.9	30.9	23.668	207	207;207;203;219;219;220;227	0	6.3555	2.6579	1.2438	15.511	14	5	Leave out requantified	3.1057	3.4205	1.7099	2.2124
947	sp|P61011|SRP54_HUMAN	sp|P61011|SRP54_HUMAN	5	5	5	sp|P61011|SRP54_HUMAN Signal recognition particle 54 kDa protein OS=Homo sapiens OX=9606 GN=SRP54 PE=1 SV=1	1	5	5	5	2	2	1	0	1	0	1	2	2	1	0	1	0	1	2	2	1	0	1	0	1	14.1	14.1	14.1	55.704	504	504	0	4.6114	1.9042	1.0689	51.286	5	4	Median	1.6017	2.9793	1.0404
948	sp|P61019|RAB2A_HUMAN;sp|Q8WUD1|RAB2B_HUMAN	sp|P61019|RAB2A_HUMAN;sp|Q8WUD1|RAB2B_HUMAN	12;7	12;7	12;7	sp|P61019|RAB2A_HUMAN Ras-related protein Rab-2A OS=Homo sapiens OX=9606 GN=RAB2A PE=1 SV=1;sp|Q8WUD1|RAB2B_HUMAN Ras-related protein Rab-2B OS=Homo sapiens OX=9606 GN=RAB2B PE=1 SV=1	2	12	12	12	7	5	5	5	8	7	4	7	5	5	5	8	7	4	7	5	5	5	8	7	4	57.1	57.1	57.1	23.545	212	212;216	0	63.648	2.3711	1.0159	22.597	38	16	Leave out requantified	2.6274	2.5665	3.278	2.1852
949	sp|P61020|RAB5B_HUMAN	sp|P61020|RAB5B_HUMAN	6	3	3	sp|P61020|RAB5B_HUMAN Ras-related protein Rab-5B OS=Homo sapiens OX=9606 GN=RAB5B PE=1 SV=1	1	6	3	3	4	5	4	5	4	5	4	1	3	1	2	1	2	2	1	3	1	2	1	2	2	35.8	20.9	20.9	23.707	215	215	0	13.827	2.3028	1.0128	0.4305	12	4	Leave out requantified	0.56337	2.4491	0.44849	1.2242
950	sp|P61026|RAB10_HUMAN	sp|P61026|RAB10_HUMAN	5	4	4	sp|P61026|RAB10_HUMAN Ras-related protein Rab-10 OS=Homo sapiens OX=9606 GN=RAB10 PE=1 SV=1	1	5	4	4	5	4	3	3	3	4	4	4	3	2	2	2	3	3	4	3	2	2	2	3	3	29.5	24	24	22.541	200	200	0	16.693	2.6425	1.1233	11.729	21	6	Leave out requantified	2.5511	2.5792	2.7281	2.8433
951	sp|P61081|UBC12_HUMAN	sp|P61081|UBC12_HUMAN	6	6	6	sp|P61081|UBC12_HUMAN NEDD8-conjugating enzyme Ubc12 OS=Homo sapiens OX=9606 GN=UBE2M PE=1 SV=1	1	6	6	6	2	5	4	4	3	5	4	2	5	4	4	3	5	4	2	5	4	4	3	5	4	35.5	35.5	35.5	20.9	183	183	0	36.104	2.6629	0.98237	60.449	26	3	Leave out requantified	1.3004	2.3604	2.9235	2.6601
952	sp|P61086|UBE2K_HUMAN	sp|P61086|UBE2K_HUMAN	5	5	5	sp|P61086|UBE2K_HUMAN Ubiquitin-conjugating enzyme E2 K OS=Homo sapiens OX=9606 GN=UBE2K PE=1 SV=3	1	5	5	5	4	3	1	1	2	3	3	4	3	1	1	2	3	3	4	3	1	1	2	3	3	37	37	37	22.406	200	200	0	17.461	1.3009	0.646	40.396	17	10	Leave out requantified	2.0661	2.2939	2.4133	2.6565
953	sp|P61088|UBE2N_HUMAN;sp|Q5JXB2|UE2NL_HUMAN	sp|P61088|UBE2N_HUMAN;sp|Q5JXB2|UE2NL_HUMAN	4;3	4;3	4;3	sp|P61088|UBE2N_HUMAN Ubiquitin-conjugating enzyme E2 N OS=Homo sapiens OX=9606 GN=UBE2N PE=1 SV=1;sp|Q5JXB2|UE2NL_HUMAN Putative ubiquitin-conjugating enzyme E2 N-like OS=Homo sapiens OX=9606 GN=UBE2NL PE=1 SV=1	2	4	4	4	2	2	2	2	2	3	1	2	2	2	2	2	3	1	2	2	2	2	2	3	1	29.6	29.6	29.6	17.138	152	152;153	0	5.0623	3.503	1.3585	54.166	14	4	Leave out requantified	4.0765	2.442	0.76017	3.0524
954	sp|P61106|RAB14_HUMAN	sp|P61106|RAB14_HUMAN	13	13	13	sp|P61106|RAB14_HUMAN Ras-related protein Rab-14 OS=Homo sapiens OX=9606 GN=RAB14 PE=1 SV=4	1	13	13	13	6	7	5	9	7	9	8	6	7	5	9	7	9	8	6	7	5	9	7	9	8	66	66	66	23.897	215	215	0	69.04	2.2001	0.95102	23.543	50	6	Leave out requantified	2.7257	2.4606	2.707	2.6611
955	sp|P61158|ARP3_HUMAN;sp|Q9P1U1|ARP3B_HUMAN;sp|Q9C0K3|ARP3C_HUMAN	sp|P61158|ARP3_HUMAN	17;2;1	17;2;1	17;2;1	sp|P61158|ARP3_HUMAN Actin-related protein 3 OS=Homo sapiens OX=9606 GN=ACTR3 PE=1 SV=3	3	17	17	17	13	11	12	10	11	10	10	13	11	12	10	11	10	10	13	11	12	10	11	10	10	51.9	51.9	51.9	47.371	418	418;418;210	0	95.823	2.7197	1.1701	52.263	84	32	Leave out requantified	3.1544	2.917	3.1918	3.261
956	sp|P61160|ARP2_HUMAN	sp|P61160|ARP2_HUMAN	13	13	13	sp|P61160|ARP2_HUMAN Actin-related protein 2 OS=Homo sapiens OX=9606 GN=ACTR2 PE=1 SV=1	1	13	13	13	10	12	6	9	7	10	11	10	12	6	9	7	10	11	10	12	6	9	7	10	11	42.9	42.9	42.9	44.76	394	394	0	106.96	2.5453	1.1552	37.161	77	30	Leave out requantified	2.9089	2.8157	3.0828	2.4913
957	sp|P61163|ACTZ_HUMAN	sp|P61163|ACTZ_HUMAN	10	10	6	sp|P61163|ACTZ_HUMAN Alpha-centractin OS=Homo sapiens OX=9606 GN=ACTR1A PE=1 SV=1	1	10	10	6	7	8	7	6	7	6	6	7	8	7	6	7	6	6	5	6	4	4	5	4	5	48.9	48.9	31.4	42.613	376	376	0	60.687	3.7541	1.8019	34.519	55	18	Leave out requantified	2.9429	3.4198	3.8351	3.6403
958	sp|P61201|CSN2_HUMAN	sp|P61201|CSN2_HUMAN	6	6	6	sp|P61201|CSN2_HUMAN COP9 signalosome complex subunit 2 OS=Homo sapiens OX=9606 GN=COPS2 PE=1 SV=1	1	6	6	6	2	2	3	4	2	0	4	2	2	3	4	2	0	4	2	2	3	4	2	0	4	15.8	15.8	15.8	51.596	443	443	0	12.089	1.7694	0.81543	28.906	17	9	Leave out requantified	0.65426	1.7465	1.4723	1.7163
959	sp|P84077|ARF1_HUMAN;sp|P61204|ARF3_HUMAN	sp|P84077|ARF1_HUMAN;sp|P61204|ARF3_HUMAN	11;11	11;11	5;5	sp|P84077|ARF1_HUMAN ADP-ribosylation factor 1 OS=Homo sapiens OX=9606 GN=ARF1 PE=1 SV=2;sp|P61204|ARF3_HUMAN ADP-ribosylation factor 3 OS=Homo sapiens OX=9606 GN=ARF3 PE=1 SV=2	2	11	11	5	9	8	7	9	8	10	9	9	8	7	9	8	10	9	5	4	3	4	3	5	4	59.7	59.7	29.8	20.697	181	181;181	0	123.96	3.6387	1.4205	30.954	78	16	Leave out requantified	3.8747	3.6405	3.9704	3.7413
960	sp|P61221|ABCE1_HUMAN	sp|P61221|ABCE1_HUMAN	12	12	12	sp|P61221|ABCE1_HUMAN ATP-binding cassette sub-family E member 1 OS=Homo sapiens OX=9606 GN=ABCE1 PE=1 SV=1	1	12	12	12	6	8	7	7	3	3	3	6	8	7	7	3	3	3	6	8	7	7	3	3	3	25	25	25	67.314	599	599	0	74.175	3.7555	2.309	39.798	32	25	Leave out requantified	4.6062	2.9965	2.9501	1.3882
961	sp|P61224|RAP1B_HUMAN;sp|P62834|RAP1A_HUMAN;sp|A6NIZ1|RP1BL_HUMAN	sp|P61224|RAP1B_HUMAN;sp|P62834|RAP1A_HUMAN;sp|A6NIZ1|RP1BL_HUMAN	7;5;4	7;5;4	7;5;4	sp|P61224|RAP1B_HUMAN Ras-related protein Rap-1b OS=Homo sapiens OX=9606 GN=RAP1B PE=1 SV=1;sp|P62834|RAP1A_HUMAN Ras-related protein Rap-1A OS=Homo sapiens OX=9606 GN=RAP1A PE=1 SV=1;sp|A6NIZ1|RP1BL_HUMAN Ras-related protein Rap-1b-like protein OS=Homo sa	3	7	7	7	2	4	5	6	4	5	3	2	4	5	6	4	5	3	2	4	5	6	4	5	3	47.8	47.8	47.8	20.825	184	184;184;184	0	52.846	2.7762	1.1742	16.046	31	6	Leave out requantified	3.076	2.3715	3.3487	3.004
962	sp|P61225|RAP2B_HUMAN	sp|P61225|RAP2B_HUMAN	1	1	1	sp|P61225|RAP2B_HUMAN Ras-related protein Rap-2b OS=Homo sapiens OX=9606 GN=RAP2B PE=1 SV=1	1	1	1	1	0	1	0	0	0	1	1	0	1	0	0	0	1	1	0	1	0	0	0	1	1	6.6	6.6	6.6	20.504	183	183	0	3.1574	1.7185	0.75245	8.0193	3	0	Median		1.7812
963	sp|P61247|RS3A_HUMAN	sp|P61247|RS3A_HUMAN	16	16	16	sp|P61247|RS3A_HUMAN 40S ribosomal protein S3a OS=Homo sapiens OX=9606 GN=RPS3A PE=1 SV=2	1	16	16	16	11	12	8	10	12	10	9	11	12	8	10	12	10	9	11	12	8	10	12	10	9	57.2	57.2	57.2	29.945	264	264	0	104.92	5.5545	2.454	13.438	85	36	Leave out requantified	6.4035	6.3607	6.8545	6.2139
964	sp|P61254|RL26_HUMAN;sp|Q9UNX3|RL26L_HUMAN	sp|P61254|RL26_HUMAN;sp|Q9UNX3|RL26L_HUMAN	4;2	4;2	4;2	sp|P61254|RL26_HUMAN 60S ribosomal protein L26 OS=Homo sapiens OX=9606 GN=RPL26 PE=1 SV=1;sp|Q9UNX3|RL26L_HUMAN 60S ribosomal protein L26-like 1 OS=Homo sapiens OX=9606 GN=RPL26L1 PE=1 SV=1	2	4	4	4	3	4	2	2	2	3	2	3	4	2	2	2	3	2	3	4	2	2	2	3	2	22.8	22.8	22.8	17.258	145	145;145	0	3.9356	5.7208	2.4039	5.8215	19	7	Leave out requantified	5.1642	4.5241	5.0462	6.4285
965	sp|P61289|PSME3_HUMAN	sp|P61289|PSME3_HUMAN	9	9	9	sp|P61289|PSME3_HUMAN Proteasome activator complex subunit 3 OS=Homo sapiens OX=9606 GN=PSME3 PE=1 SV=1	1	9	9	9	8	6	6	5	5	5	5	8	6	6	5	5	5	5	8	6	6	5	5	5	5	37.8	37.8	37.8	29.506	254	254	0	60.684	1.8072	0.69264	27.039	40	15	Leave out requantified	1.9114	1.7891	1.709	2.0762
966	sp|P61313|RL15_HUMAN	sp|P61313|RL15_HUMAN	8	8	8	sp|P61313|RL15_HUMAN 60S ribosomal protein L15 OS=Homo sapiens OX=9606 GN=RPL15 PE=1 SV=2	1	8	8	8	5	3	4	4	5	7	7	5	3	4	4	5	7	7	5	3	4	4	5	7	7	40.2	40.2	40.2	24.146	204	204	0	19.541	6.0337	2.6063	9.927	36	21	Leave out requantified	5.7218	6.3302	5.9413	5.8818
967	sp|P61326|MGN_HUMAN;sp|Q96A72|MGN2_HUMAN	sp|P61326|MGN_HUMAN;sp|Q96A72|MGN2_HUMAN	6;6	6;6	6;6	sp|P61326|MGN_HUMAN Protein mago nashi homolog OS=Homo sapiens OX=9606 GN=MAGOH PE=1 SV=1;sp|Q96A72|MGN2_HUMAN Protein mago nashi homolog 2 OS=Homo sapiens OX=9606 GN=MAGOHB PE=1 SV=1	2	6	6	6	3	4	4	4	3	5	2	3	4	4	4	3	5	2	3	4	4	4	3	5	2	63.7	63.7	63.7	17.163	146	146;148	0	18.691	2.8263	1.2423	28.57	26	5	Leave out requantified	2.4945	2.6424	2.8818	3.1854
968	sp|P61353|RL27_HUMAN	sp|P61353|RL27_HUMAN	7	7	7	sp|P61353|RL27_HUMAN 60S ribosomal protein L27 OS=Homo sapiens OX=9606 GN=RPL27 PE=1 SV=2	1	7	7	7	2	3	4	5	3	4	3	2	3	4	5	3	4	3	2	3	4	5	3	4	3	45.6	45.6	45.6	15.798	136	136	0	20.949	3.0971	1.6332	43.25	24	7	Leave out requantified	2.8443	3.3194	3.1079	3.4112
970	sp|P61513|RL37A_HUMAN;sp|A6NKH3|RL37L_HUMAN	sp|P61513|RL37A_HUMAN	4;1	4;1	4;1	sp|P61513|RL37A_HUMAN 60S ribosomal protein L37a OS=Homo sapiens OX=9606 GN=RPL37A PE=1 SV=2	2	4	4	4	4	3	2	2	3	2	1	4	3	2	2	3	2	1	4	3	2	2	3	2	1	51.1	51.1	51.1	10.275	92	92;93	0	23.704	6.169	3.1209	21.757	16	11	Leave out requantified	4.9568	2.3966	3.058	0.8048
971	sp|P61586|RHOA_HUMAN	sp|P61586|RHOA_HUMAN	10	10	2	sp|P61586|RHOA_HUMAN Transforming protein RhoA OS=Homo sapiens OX=9606 GN=RHOA PE=1 SV=1	1	10	10	2	10	10	7	8	10	8	6	10	10	7	8	10	8	6	2	2	2	1	2	2	1	59.6	59.6	12.4	21.768	193	193	0	101.86	2.9277	1.3197	18.081	70	12	Leave out requantified	2.8662	2.8506	3.1153	2.9434
972	sp|P61604|CH10_HUMAN	sp|P61604|CH10_HUMAN	3	3	3	sp|P61604|CH10_HUMAN 10 kDa heat shock protein, mitochondrial OS=Homo sapiens OX=9606 GN=HSPE1 PE=1 SV=2	1	3	3	3	3	3	3	3	3	3	3	3	3	3	3	3	3	3	3	3	3	3	3	3	3	32.4	32.4	32.4	10.932	102	102	0	13.719	3.2162	1.5189	34.432	21	8	Leave out requantified	3.9532	2.8487	5.5328	4.2992
973	sp|P61619|S61A1_HUMAN	sp|P61619|S61A1_HUMAN	2	2	2	sp|P61619|S61A1_HUMAN Protein transport protein Sec61 subunit alpha isoform 1 OS=Homo sapiens OX=9606 GN=SEC61A1 PE=1 SV=2	1	2	2	2	1	1	0	1	1	0	1	1	1	0	1	1	0	1	1	1	0	1	1	0	1	6.5	6.5	6.5	52.264	476	476	0	2.4722	1.2847	0.68468	72.32	5	3	Median	0.78259	2.93		1.415
975	sp|P61758|PFD3_HUMAN	sp|P61758|PFD3_HUMAN	5	5	5	sp|P61758|PFD3_HUMAN Prefoldin subunit 3 OS=Homo sapiens OX=9606 GN=VBP1 PE=1 SV=4	1	5	5	5	3	2	4	2	2	3	3	3	2	4	2	2	3	3	3	2	4	2	2	3	3	22.8	22.8	22.8	22.626	197	197	0	14.563	1.7971	0.76708	49.495	18	8	Leave out requantified	1.5829	1.3036	1.6538	1.4998
976	sp|P61769|B2MG_HUMAN	sp|P61769|B2MG_HUMAN	2	2	2	sp|P61769|B2MG_HUMAN Beta-2-microglobulin OS=Homo sapiens OX=9606 GN=B2M PE=1 SV=1	1	2	2	2	2	1	2	2	2	1	0	2	1	2	2	2	1	0	2	1	2	2	2	1	0	26.9	26.9	26.9	13.714	119	119	0	7.3536	1.4663	0.56463	49.931	10	1	Leave out requantified	1.5946	1.0004	1.5036	1.1451
978	sp|P61916|NPC2_HUMAN	sp|P61916|NPC2_HUMAN	2	2	2	sp|P61916|NPC2_HUMAN NPC intracellular cholesterol transporter 2 OS=Homo sapiens OX=9606 GN=NPC2 PE=1 SV=1	1	2	2	2	2	2	2	2	2	1	1	2	2	2	2	2	1	1	2	2	2	2	2	1	1	16.6	16.6	16.6	16.57	151	151	0	3.8398	2.2793	1.0079	32.475	12	5	Median	2.2132	2.4	1.6956	2.0553
979	sp|P61923|COPZ1_HUMAN	sp|P61923|COPZ1_HUMAN	2	2	2	sp|P61923|COPZ1_HUMAN Coatomer subunit zeta-1 OS=Homo sapiens OX=9606 GN=COPZ1 PE=1 SV=1	1	2	2	2	1	1	2	0	1	0	0	1	1	2	0	1	0	0	1	1	2	0	1	0	0	14.1	14.1	14.1	20.198	177	177	0	2.7221	1.8998	0.81671	27.352	5	3	Median	1.886	1.8998	3.0605
980	sp|P61956|SUMO2_HUMAN;sp|Q6EEV6|SUMO4_HUMAN;sp|P55854|SUMO3_HUMAN	sp|P61956|SUMO2_HUMAN;sp|Q6EEV6|SUMO4_HUMAN;sp|P55854|SUMO3_HUMAN	2;1;1	2;1;1	2;1;1	sp|P61956|SUMO2_HUMAN Small ubiquitin-related modifier 2 OS=Homo sapiens OX=9606 GN=SUMO2 PE=1 SV=3;sp|Q6EEV6|SUMO4_HUMAN Small ubiquitin-related modifier 4 OS=Homo sapiens OX=9606 GN=SUMO4 PE=1 SV=2;sp|P55854|SUMO3_HUMAN Small ubiquitin-related modifier 3	3	2	2	2	2	2	1	1	1	1	1	2	2	1	1	1	1	1	2	2	1	1	1	1	1	23.2	23.2	23.2	10.871	95	95;95;103	0	9.7025	1.3864	0.60084	39.244	9	0	Leave out requantified	1.4739	1.3278	1.9184	1.9322
983	sp|P61970|NTF2_HUMAN	sp|P61970|NTF2_HUMAN	2	2	2	sp|P61970|NTF2_HUMAN Nuclear transport factor 2 OS=Homo sapiens OX=9606 GN=NUTF2 PE=1 SV=1	1	2	2	2	0	1	1	0	1	1	0	0	1	1	0	1	1	0	0	1	1	0	1	1	0	18.1	18.1	18.1	14.478	127	127	0.00059595	1.7838	1.9543	0.82446	18.386	3	0	Median		2.0397
984	sp|P61978|HNRPK_HUMAN	sp|P61978|HNRPK_HUMAN	26	26	26	sp|P61978|HNRPK_HUMAN Heterogeneous nuclear ribonucleoprotein K OS=Homo sapiens OX=9606 GN=HNRNPK PE=1 SV=1	1	26	26	26	22	24	21	20	23	21	22	22	24	21	20	23	21	22	22	24	21	20	23	21	22	63.9	63.9	63.9	50.976	463	463	0	323.31	3.4988	1.4729	36.268	217	39	Leave out requantified	3.7554	3.5377	4.145	3.6358
985	sp|P61981|1433G_HUMAN	sp|P61981|1433G_HUMAN	17	11	11	sp|P61981|1433G_HUMAN 14-3-3 protein gamma OS=Homo sapiens OX=9606 GN=YWHAG PE=1 SV=2	1	17	11	11	16	16	15	15	15	14	14	10	10	9	9	10	8	9	10	10	9	9	10	8	9	72.5	55.9	55.9	28.302	247	247	0	128.53	1.8322	0.71125	25.932	68	0	Leave out requantified	1.8178	1.9084	1.9718	1.8918
986	sp|P62070|RRAS2_HUMAN	sp|P62070|RRAS2_HUMAN	4	2	2	sp|P62070|RRAS2_HUMAN Ras-related protein R-Ras2 OS=Homo sapiens OX=9606 GN=RRAS2 PE=1 SV=1	1	4	2	2	3	3	4	3	4	4	4	2	2	2	2	2	2	2	2	2	2	2	2	2	2	25	11.8	11.8	23.399	204	204	0	11.756	3.1653	1.3659	19.899	14	7	Leave out requantified	3.826	3.2244	3.4036	3.7315
987	sp|P62081|RS7_HUMAN	sp|P62081|RS7_HUMAN	14	14	14	sp|P62081|RS7_HUMAN 40S ribosomal protein S7 OS=Homo sapiens OX=9606 GN=RPS7 PE=1 SV=1	1	14	14	14	10	10	8	10	7	8	8	10	10	8	10	7	8	8	10	10	8	10	7	8	8	67	67	67	22.127	194	194	0	117.13	4.3949	2.0872	20.671	72	39	Leave out requantified	4.7009	4.4548	5.8113	5.3295
988	sp|P62136|PP1A_HUMAN	sp|P62136|PP1A_HUMAN	17	17	4	sp|P62136|PP1A_HUMAN Serine/threonine-protein phosphatase PP1-alpha catalytic subunit OS=Homo sapiens OX=9606 GN=PPP1CA PE=1 SV=1	1	17	17	4	10	12	9	11	10	11	11	10	12	9	11	10	11	11	1	3	1	1	2	1	3	67.9	67.9	19.1	37.512	330	330	0	108.2	3.1426	1.4291	9.8084	85	36	Leave out requantified	3.1151	3.4099	3.5192	3.556
989	sp|P62140|PP1B_HUMAN	sp|P62140|PP1B_HUMAN	14	4	4	sp|P62140|PP1B_HUMAN Serine/threonine-protein phosphatase PP1-beta catalytic subunit OS=Homo sapiens OX=9606 GN=PPP1CB PE=1 SV=3	1	14	4	4	7	7	7	9	8	10	9	0	1	1	2	1	2	3	0	1	1	2	1	2	3	59.3	22.3	22.3	37.186	327	327	0	6.2218	2.4961	1.3198	3.6145	7	3	Leave out requantified				2.4735
990	sp|P62191|PRS4_HUMAN	sp|P62191|PRS4_HUMAN	13	13	13	sp|P62191|PRS4_HUMAN 26S proteasome regulatory subunit 4 OS=Homo sapiens OX=9606 GN=PSMC1 PE=1 SV=1	1	13	13	13	6	8	4	6	7	10	6	6	8	4	6	7	10	6	6	8	4	6	7	10	6	40.7	40.7	40.7	49.184	440	440	0	102.54	3.8445	1.8219	37.477	49	12	Leave out requantified	4.5511	4.6077	5.2873	4.7542
991	sp|P62195|PRS8_HUMAN;sp|Q8NB90|AFG2H_HUMAN	sp|P62195|PRS8_HUMAN	17;1	17;1	17;1	sp|P62195|PRS8_HUMAN 26S proteasome regulatory subunit 8 OS=Homo sapiens OX=9606 GN=PSMC5 PE=1 SV=1	2	17	17	17	9	12	10	10	12	8	8	9	12	10	10	12	8	8	9	12	10	10	12	8	8	51	51	51	45.626	406	406;893	0	149.59	3.5638	1.5537	57.446	79	45	Leave out requantified	3.7845	4.1519	4.4456	3.6203
992	sp|P62241|RS8_HUMAN	sp|P62241|RS8_HUMAN	10	10	10	sp|P62241|RS8_HUMAN 40S ribosomal protein S8 OS=Homo sapiens OX=9606 GN=RPS8 PE=1 SV=2	1	10	10	10	6	8	7	8	9	9	8	6	8	7	8	9	9	8	6	8	7	8	9	9	8	52.4	52.4	52.4	24.205	208	208	0	98.9	6.5523	2.3837	19.921	66	21	Leave out requantified	5.3664	6.5523	8.0376	5.8666
993	sp|P62244|RS15A_HUMAN	sp|P62244|RS15A_HUMAN	7	7	7	sp|P62244|RS15A_HUMAN 40S ribosomal protein S15a OS=Homo sapiens OX=9606 GN=RPS15A PE=1 SV=2	1	7	7	7	3	7	6	4	4	4	5	3	7	6	4	4	4	5	3	7	6	4	4	4	5	56.9	56.9	56.9	14.839	130	130	0	42.016	5.6119	2.213	6.9564	36	18	Leave out requantified	6.4432	6.0319	6.7348	3.0385
994	sp|P62249|RS16_HUMAN	sp|P62249|RS16_HUMAN	12	12	12	sp|P62249|RS16_HUMAN 40S ribosomal protein S16 OS=Homo sapiens OX=9606 GN=RPS16 PE=1 SV=2	1	12	12	12	8	7	6	7	6	7	8	8	7	6	7	6	7	8	8	7	6	7	6	7	8	64.4	64.4	64.4	16.445	146	146	0	26.168	6.0153	2.3514	34.57	51	15	Leave out requantified	6.2332	6.0028	7.6595	6.1082
996	sp|P62258|1433E_HUMAN	sp|P62258|1433E_HUMAN	28	28	25	sp|P62258|1433E_HUMAN 14-3-3 protein epsilon OS=Homo sapiens OX=9606 GN=YWHAE PE=1 SV=1	1	28	28	25	24	24	25	26	24	25	24	24	24	25	26	24	25	24	21	21	22	23	22	22	22	81.2	81.2	78	29.174	255	255	0	288.18	1.8921	0.98436	33.808	252	22	Leave out requantified	1.9331	1.8564	1.9697	1.9515
997	sp|P62263|RS14_HUMAN	sp|P62263|RS14_HUMAN	8	8	8	sp|P62263|RS14_HUMAN 40S ribosomal protein S14 OS=Homo sapiens OX=9606 GN=RPS14 PE=1 SV=3	1	8	8	8	4	6	6	6	7	6	6	4	6	6	6	7	6	6	4	6	6	6	7	6	6	67.5	67.5	67.5	16.273	151	151	0	29.471	4.5628	2.1666	23.526	50	21	Leave out requantified	4.6296	4.3114	4.9154	5.2537
998	sp|P62266|RS23_HUMAN	sp|P62266|RS23_HUMAN	7	7	7	sp|P62266|RS23_HUMAN 40S ribosomal protein S23 OS=Homo sapiens OX=9606 GN=RPS23 PE=1 SV=3	1	7	7	7	5	6	5	2	3	4	4	5	6	5	2	3	4	4	5	6	5	2	3	4	4	49.7	49.7	49.7	15.807	143	143	0	23.267	5.9934	2.618	5.4905	27	13	Leave out requantified	6.3325	4.7342	7.1211	3.2355
999	sp|P62269|RS18_HUMAN	sp|P62269|RS18_HUMAN	14	14	14	sp|P62269|RS18_HUMAN 40S ribosomal protein S18 OS=Homo sapiens OX=9606 GN=RPS18 PE=1 SV=3	1	14	14	14	9	11	13	10	8	7	9	9	11	13	10	8	7	9	9	11	13	10	8	7	9	62.5	62.5	62.5	17.718	152	152	0	39.997	5.6085	2.4265	50.462	75	31	Leave out requantified	5.6263	5.1786	6.6775	5.8257
1000	sp|P62277|RS13_HUMAN	sp|P62277|RS13_HUMAN	8	8	8	sp|P62277|RS13_HUMAN 40S ribosomal protein S13 OS=Homo sapiens OX=9606 GN=RPS13 PE=1 SV=2	1	8	8	8	8	5	6	6	7	7	6	8	5	6	6	7	7	6	8	5	6	6	7	7	6	48.3	48.3	48.3	17.222	151	151	0	27.908	3.3171	1.5064	18.391	47	17	Leave out requantified	3.5377	3.909	3.6173	3.2324
1001	sp|P62280|RS11_HUMAN	sp|P62280|RS11_HUMAN	12	12	12	sp|P62280|RS11_HUMAN 40S ribosomal protein S11 OS=Homo sapiens OX=9606 GN=RPS11 PE=1 SV=3	1	12	12	12	9	9	10	11	10	10	8	9	9	10	11	10	10	8	9	9	10	11	10	10	8	62	62	62	18.431	158	158	0	42.969	6.7875	2.6033	23.857	80	37	Leave out requantified	7.0438	6.4411	8.0407	6.8397
1002	sp|P62304|RUXE_HUMAN	sp|P62304|RUXE_HUMAN	2	2	2	sp|P62304|RUXE_HUMAN Small nuclear ribonucleoprotein E OS=Homo sapiens OX=9606 GN=SNRPE PE=1 SV=1	1	2	2	2	1	1	1	1	1	2	1	1	1	1	1	1	2	1	1	1	1	1	1	2	1	25	25	25	10.803	92	92	0	8.1211	2.7776	1.0291	14.005	9	0	Median	2.8374	2.6779	2.6777	3.2517
1003	sp|P62306|RUXF_HUMAN	sp|P62306|RUXF_HUMAN	2	2	2	sp|P62306|RUXF_HUMAN Small nuclear ribonucleoprotein F OS=Homo sapiens OX=9606 GN=SNRPF PE=1 SV=1	1	2	2	2	1	1	2	2	1	1	1	1	1	2	2	1	1	1	1	1	2	2	1	1	1	24.4	24.4	24.4	9.7251	86	86	0	5.8905	2.1817	0.83576	19.56	16	4	Leave out requantified	1.9138	1.6456	2.2376	2.2465
1005	sp|P62314|SMD1_HUMAN	sp|P62314|SMD1_HUMAN	3	3	3	sp|P62314|SMD1_HUMAN Small nuclear ribonucleoprotein Sm D1 OS=Homo sapiens OX=9606 GN=SNRPD1 PE=1 SV=1	1	3	3	3	3	3	3	2	3	3	3	3	3	3	2	3	3	3	3	3	3	2	3	3	3	37.8	37.8	37.8	13.281	119	119	0	18.608	2.8278	1.4395	3.8997	23	10	Leave out requantified	2.029	2.3714	1.6065	1.5538
1006	sp|P62316|SMD2_HUMAN	sp|P62316|SMD2_HUMAN	7	7	7	sp|P62316|SMD2_HUMAN Small nuclear ribonucleoprotein Sm D2 OS=Homo sapiens OX=9606 GN=SNRPD2 PE=1 SV=1	1	7	7	7	4	3	3	2	3	5	4	4	3	3	2	3	5	4	4	3	3	2	3	5	4	59.3	59.3	59.3	13.527	118	118	0	12.107	2.3883	1.0779	22.602	24	6	Leave out requantified	3.04	2.5818	2.6135	1.8952
1007	sp|P62318|SMD3_HUMAN	sp|P62318|SMD3_HUMAN	3	3	3	sp|P62318|SMD3_HUMAN Small nuclear ribonucleoprotein Sm D3 OS=Homo sapiens OX=9606 GN=SNRPD3 PE=1 SV=1	1	3	3	3	2	3	3	3	3	3	3	2	3	3	3	3	3	3	2	3	3	3	3	3	3	39.7	39.7	39.7	13.916	126	126	0	41.506	2.3162	0.88918	22.55	20	6	Leave out requantified	2.2717	2.6548	2.1718	2.5929
1008	sp|P62330|ARF6_HUMAN	sp|P62330|ARF6_HUMAN	3	3	3	sp|P62330|ARF6_HUMAN ADP-ribosylation factor 6 OS=Homo sapiens OX=9606 GN=ARF6 PE=1 SV=2	1	3	3	3	3	3	3	1	3	3	3	3	3	3	1	3	3	3	3	3	3	1	3	3	3	24.6	24.6	24.6	20.082	175	175	0	17.719	3.8545	1.847	11.23	19	13	Leave out requantified	4.9337	5.1199	5.6707	4.3234
1009	sp|P62333|PRS10_HUMAN	sp|P62333|PRS10_HUMAN	17	17	17	sp|P62333|PRS10_HUMAN 26S proteasome regulatory subunit 10B OS=Homo sapiens OX=9606 GN=PSMC6 PE=1 SV=1	1	17	17	17	11	10	12	10	12	13	9	11	10	12	10	12	13	9	11	10	12	10	12	13	9	61.2	61.2	61.2	44.172	389	389	0	130.31	3.4058	1.5208	65.753	84	28	Leave out requantified	3.5821	3.9829	4.8285	3.7559
1010	sp|P62424|RL7A_HUMAN	sp|P62424|RL7A_HUMAN	14	14	14	sp|P62424|RL7A_HUMAN 60S ribosomal protein L7a OS=Homo sapiens OX=9606 GN=RPL7A PE=1 SV=2	1	14	14	14	8	8	9	7	6	6	7	8	8	9	7	6	6	7	8	8	9	7	6	6	7	47.7	47.7	47.7	29.995	266	266	0	49.851	4.7218	2.3676	42.225	50	29	Leave out requantified	4.7218	6.051	4.9875	4.7072
1011	sp|P62495|ERF1_HUMAN	sp|P62495|ERF1_HUMAN	11	11	11	sp|P62495|ERF1_HUMAN Eukaryotic peptide chain release factor subunit 1 OS=Homo sapiens OX=9606 GN=ETF1 PE=1 SV=3	1	11	11	11	6	6	5	4	4	7	7	6	6	5	4	4	7	7	6	6	5	4	4	7	7	31.1	31.1	31.1	49.03	437	437	0	42.285	4.1914	1.6029	25.717	36	17	Leave out requantified	4.1662	6.267	5.9352	3.5779
1012	sp|P62633|CNBP_HUMAN	sp|P62633|CNBP_HUMAN	2	2	2	sp|P62633|CNBP_HUMAN Cellular nucleic acid-binding protein OS=Homo sapiens OX=9606 GN=CNBP PE=1 SV=1	1	2	2	2	2	1	0	0	0	0	1	2	1	0	0	0	0	1	2	1	0	0	0	0	1	13.6	13.6	13.6	19.463	177	177	0	2.8985	2.7956	1.1119	10.616	3	0	Plateau	2.5583	2.8967
1013	sp|P62701|RS4X_HUMAN;sp|Q8TD47|RS4Y2_HUMAN;sp|P22090|RS4Y1_HUMAN	sp|P62701|RS4X_HUMAN	19;7;7	19;7;7	19;7;7	sp|P62701|RS4X_HUMAN 40S ribosomal protein S4, X isoform OS=Homo sapiens OX=9606 GN=RPS4X PE=1 SV=2	3	19	19	19	15	14	15	14	13	13	14	15	14	15	14	13	13	14	15	14	15	14	13	13	14	60.8	60.8	60.8	29.597	263	263;263;263	0	102.59	6.1091	2.442	21.674	100	37	Leave out requantified	6.3998	5.904	7.2647	6.8288
1014	sp|P62750|RL23A_HUMAN	sp|P62750|RL23A_HUMAN	6	6	6	sp|P62750|RL23A_HUMAN 60S ribosomal protein L23a OS=Homo sapiens OX=9606 GN=RPL23A PE=1 SV=1	1	6	6	6	3	4	5	3	4	4	3	3	4	5	3	4	4	3	3	4	5	3	4	4	3	28.8	28.8	28.8	17.695	156	156	0	11.462	2.3156	0.97554	50.752	21	11	Leave out requantified	2.1748	2.3233	2.0791	2.3212
1015	sp|P62753|RS6_HUMAN	sp|P62753|RS6_HUMAN	12	12	12	sp|P62753|RS6_HUMAN 40S ribosomal protein S6 OS=Homo sapiens OX=9606 GN=RPS6 PE=1 SV=1	1	12	12	12	7	10	6	6	5	4	8	7	10	6	6	5	4	8	7	10	6	6	5	4	8	44.6	44.6	44.6	28.68	249	249	0	84.408	5.5109	2.691	24.219	50	29	Leave out requantified	4.8365	6.2349	5.928	4.2525
1016	sp|P62805|H4_HUMAN	sp|P62805|H4_HUMAN	8	8	8	sp|P62805|H4_HUMAN Histone H4 OS=Homo sapiens OX=9606 GN=H4C1 PE=1 SV=2	1	8	8	8	5	7	6	5	6	7	7	5	7	6	5	6	7	7	5	7	6	5	6	7	7	58.3	58.3	58.3	11.367	103	103	0	27.535	2.6304	1.2183	16.27	62	10	Leave out requantified	2.7869	2.6579	3.2185	2.479
1017	sp|P62820|RAB1A_HUMAN;sp|P59190|RAB15_HUMAN	sp|P62820|RAB1A_HUMAN	10;1	4;0	4;0	sp|P62820|RAB1A_HUMAN Ras-related protein Rab-1A OS=Homo sapiens OX=9606 GN=RAB1A PE=1 SV=3	2	10	4	4	6	5	6	5	5	7	6	2	1	3	2	1	3	3	2	1	3	2	1	3	3	57.1	28.8	28.8	22.677	205	205;212	0	20.23	2.5007	1.1287	13.578	15	4	Leave out requantified	0.78843	2.7689	2.4984	2.565
1018	sp|P62826|RAN_HUMAN	sp|P62826|RAN_HUMAN	14	14	14	sp|P62826|RAN_HUMAN GTP-binding nuclear protein Ran OS=Homo sapiens OX=9606 GN=RAN PE=1 SV=3	1	14	14	14	11	11	11	11	8	9	10	11	11	11	11	8	9	10	11	11	11	11	8	9	10	49.1	49.1	49.1	24.423	216	216	0	109.47	3.4959	1.4329	26.077	84	11	Leave out requantified	3.2647	3.4983	3.7595	3.5751
1019	sp|P62829|RL23_HUMAN	sp|P62829|RL23_HUMAN	6	6	6	sp|P62829|RL23_HUMAN 60S ribosomal protein L23 OS=Homo sapiens OX=9606 GN=RPL23 PE=1 SV=1	1	6	6	6	5	5	4	6	4	5	5	5	5	4	6	4	5	5	5	5	4	6	4	5	5	44.3	44.3	44.3	14.865	140	140	0	51.998	5.2392	2.2149	8.2907	48	20	Leave out requantified	5.6077	5.2984	5.779	5.6991
1020	sp|P62841|RS15_HUMAN	sp|P62841|RS15_HUMAN	3	3	3	sp|P62841|RS15_HUMAN 40S ribosomal protein S15 OS=Homo sapiens OX=9606 GN=RPS15 PE=1 SV=2	1	3	3	3	2	3	2	1	3	2	3	2	3	2	1	3	2	3	2	3	2	1	3	2	3	27.6	27.6	27.6	17.04	145	145	0	13.218	3.068	1.8222	4.2459	19	5	Leave out requantified	3.3603	3.3783	14.571	2.809
1021	sp|P62847|RS24_HUMAN	sp|P62847|RS24_HUMAN	5	5	5	sp|P62847|RS24_HUMAN 40S ribosomal protein S24 OS=Homo sapiens OX=9606 GN=RPS24 PE=1 SV=1	1	5	5	5	2	4	3	4	3	3	2	2	4	3	4	3	3	2	2	4	3	4	3	3	2	34.6	34.6	34.6	15.423	133	133	0	21.983	4.1519	1.7113	83.118	24	14	Leave out requantified	4.4677	5.0743	6.9075	3.3708
1022	sp|P62851|RS25_HUMAN	sp|P62851|RS25_HUMAN	5	5	5	sp|P62851|RS25_HUMAN 40S ribosomal protein S25 OS=Homo sapiens OX=9606 GN=RPS25 PE=1 SV=1	1	5	5	5	4	2	3	3	3	3	3	4	2	3	3	3	3	3	4	2	3	3	3	3	3	30.4	30.4	30.4	13.742	125	125	0	16.202	3.7353	1.9432	28.359	22	12	Leave out requantified	3.6296	3.7386	4.2894	3.7825
1023	sp|P62854|RS26_HUMAN;sp|Q5JNZ5|RS26L_HUMAN	sp|P62854|RS26_HUMAN;sp|Q5JNZ5|RS26L_HUMAN	4;3	4;3	4;3	sp|P62854|RS26_HUMAN 40S ribosomal protein S26 OS=Homo sapiens OX=9606 GN=RPS26 PE=1 SV=3;sp|Q5JNZ5|RS26L_HUMAN Putative 40S ribosomal protein S26-like 1 OS=Homo sapiens OX=9606 GN=RPS26P11 PE=5 SV=1	2	4	4	4	4	4	3	3	2	2	3	4	4	3	3	2	2	3	4	4	3	3	2	2	3	37.4	37.4	37.4	13.015	115	115;115	0	15.937	5.6739	2.2954	107.28	23	9	Leave out requantified	5.0174	6.0213	3.5921	7.0429
1024	sp|P62857|RS28_HUMAN	sp|P62857|RS28_HUMAN	1	1	1	sp|P62857|RS28_HUMAN 40S ribosomal protein S28 OS=Homo sapiens OX=9606 GN=RPS28 PE=1 SV=1	1	1	1	1	1	1	1	0	0	1	0	1	1	1	0	0	1	0	1	1	1	0	0	1	0	15.9	15.9	15.9	7.8409	69	69	0.0086486	1.0482	2.2898	1.347	21.705	4	3	Median	2.1828	2.4021	2.626
1025	sp|P62873|GBB1_HUMAN;sp|P16520|GBB3_HUMAN	sp|P62873|GBB1_HUMAN	13;2	13;2	7;0	sp|P62873|GBB1_HUMAN Guanine nucleotide-binding protein G(I)/G(S)/G(T) subunit beta-1 OS=Homo sapiens OX=9606 GN=GNB1 PE=1 SV=3	2	13	13	7	9	9	11	10	8	9	9	9	9	11	10	8	9	9	4	4	5	5	3	5	4	54.4	54.4	33.2	37.377	340	340;340	0	138.7	3.0897	1.4093	33.464	67	19	Leave out requantified	3.6811	3.5547	3.929	3.4184
1026	sp|P62877|RBX1_HUMAN	sp|P62877|RBX1_HUMAN	2	2	2	sp|P62877|RBX1_HUMAN E3 ubiquitin-protein ligase RBX1 OS=Homo sapiens OX=9606 GN=RBX1 PE=1 SV=1	1	2	2	2	1	1	2	2	2	1	1	1	1	2	2	2	1	1	1	1	2	2	2	1	1	24.1	24.1	24.1	12.274	108	108	0	7.1216	0.42157	0.15604	91.114	9	7	Median	0.33154	0.42157	0.28151	1.7576
1027	sp|P62879|GBB2_HUMAN	sp|P62879|GBB2_HUMAN	13	7	5	sp|P62879|GBB2_HUMAN Guanine nucleotide-binding protein G(I)/G(S)/G(T) subunit beta-2 OS=Homo sapiens OX=9606 GN=GNB2 PE=1 SV=3	1	13	7	5	9	10	10	9	9	9	8	4	5	4	4	4	5	3	2	4	3	3	3	5	2	60.3	39.1	31.2	37.331	340	340	0	49.671	3.4325	1.2689	61.904	32	19	Leave out requantified	3.4325	2.1515	4.0364	3.7869
1028	sp|P62888|RL30_HUMAN	sp|P62888|RL30_HUMAN	6	6	6	sp|P62888|RL30_HUMAN 60S ribosomal protein L30 OS=Homo sapiens OX=9606 GN=RPL30 PE=1 SV=2	1	6	6	6	4	4	6	5	5	4	4	4	4	6	5	5	4	4	4	4	6	5	5	4	4	67	67	67	12.784	115	115	0	33.906	4.1335	1.5582	18.703	39	11	Leave out requantified	4.3052	4.0626	4.6783	4.26
1029	sp|P62899|RL31_HUMAN	sp|P62899|RL31_HUMAN	5	5	5	sp|P62899|RL31_HUMAN 60S ribosomal protein L31 OS=Homo sapiens OX=9606 GN=RPL31 PE=1 SV=1	1	5	5	5	3	4	4	5	3	3	3	3	4	4	5	3	3	3	3	4	4	5	3	3	3	36.8	36.8	36.8	14.463	125	125	0	8.8919	2.4688	1.0406	13.827	25	2	Leave out requantified	2.6266	2.7504	2.6969	2.429
1030	sp|P62906|RL10A_HUMAN	sp|P62906|RL10A_HUMAN	9	9	9	sp|P62906|RL10A_HUMAN 60S ribosomal protein L10a OS=Homo sapiens OX=9606 GN=RPL10A PE=1 SV=2	1	9	9	9	6	5	6	5	5	4	2	6	5	6	5	5	4	2	6	5	6	5	5	4	2	37.3	37.3	37.3	24.831	217	217	0	28.896	5.0812	2.3344	32.361	28	19	Leave out requantified	5.3546	2.6604	3.6848	2.1099
1031	sp|P62910|RL32_HUMAN	sp|P62910|RL32_HUMAN	5	5	5	sp|P62910|RL32_HUMAN 60S ribosomal protein L32 OS=Homo sapiens OX=9606 GN=RPL32 PE=1 SV=2	1	5	5	5	2	3	2	1	3	4	3	2	3	2	1	3	4	3	2	3	2	1	3	4	3	35.6	35.6	35.6	15.86	135	135	0	13.907	3.6196	1.7552	52.179	16	11	Median	4.5261	4.3149	3.8624	3.9698
1032	sp|P62913|RL11_HUMAN	sp|P62913|RL11_HUMAN	5	5	5	sp|P62913|RL11_HUMAN 60S ribosomal protein L11 OS=Homo sapiens OX=9606 GN=RPL11 PE=1 SV=2	1	5	5	5	3	3	3	3	4	3	1	3	3	3	3	4	3	1	3	3	3	3	4	3	1	30.9	30.9	30.9	20.252	178	178	0	16.575	6.8763	2.6366	6.7758	20	9	Leave out requantified	6.9931	5.5387	3.377	7.0439
1033	sp|P62917|RL8_HUMAN	sp|P62917|RL8_HUMAN	11	11	11	sp|P62917|RL8_HUMAN 60S ribosomal protein L8 OS=Homo sapiens OX=9606 GN=RPL8 PE=1 SV=2	1	11	11	11	6	8	8	6	5	5	6	6	8	8	6	5	5	6	6	8	8	6	5	5	6	47.1	47.1	47.1	28.024	257	257	0	45.992	5.3931	2.55	57.859	44	24	Leave out requantified	5.9372	6.5461	6.3267	6.93
1034	sp|P62937|PPIA_HUMAN;sp|Q9Y536|PAL4A_HUMAN;sp|P0DN26|PAL4F_HUMAN;sp|F5H284|PAL4D_HUMAN;sp|A0A0B4J2A2|PAL4C_HUMAN;sp|A0A075B767|PAL4H_HUMAN;sp|A0A075B759|PAL4E_HUMAN;sp|P0DN37|PAL4G_HUMAN	sp|P62937|PPIA_HUMAN	15;3;3;3;3;3;3;2	15;3;3;3;3;3;3;2	15;3;3;3;3;3;3;2	sp|P62937|PPIA_HUMAN Peptidyl-prolyl cis-trans isomerase A OS=Homo sapiens OX=9606 GN=PPIA PE=1 SV=2	8	15	15	15	12	13	13	14	12	12	12	12	13	13	14	12	12	12	12	13	13	14	12	12	12	79.4	79.4	79.4	18.012	165	165;164;164;164;164;164;164;164	0	233.47	3.1053	1.5278	28.581	166	25	Leave out requantified	3.4192	3.1714	3.5591	3.2306
1035	sp|P62942|FKB1A_HUMAN	sp|P62942|FKB1A_HUMAN	4	4	4	sp|P62942|FKB1A_HUMAN Peptidyl-prolyl cis-trans isomerase FKBP1A OS=Homo sapiens OX=9606 GN=FKBP1A PE=1 SV=2	1	4	4	4	3	3	4	4	3	3	2	3	3	4	4	3	3	2	3	3	4	4	3	3	2	61.1	61.1	61.1	11.951	108	108	0	20.886	2.6473	1.3213	71.547	28	8	Leave out requantified	2.5985	2.286	2.697	3.0218
1036	sp|P62979|RS27A_HUMAN	sp|P62979|RS27A_HUMAN	5	5	1	sp|P62979|RS27A_HUMAN Ubiquitin-40S ribosomal protein S27a OS=Homo sapiens OX=9606 GN=RPS27A PE=1 SV=2	1	5	5	1	5	4	5	4	5	5	4	5	4	5	4	5	5	4	1	1	1	1	1	1	1	42.3	42.3	12.2	17.965	156	156	0	42.416	2.5458	1.2034	23.239	45	5	Leave out requantified	2.4157	2.1506	2.8429	2.388
1037	sp|P62995|TRA2B_HUMAN	sp|P62995|TRA2B_HUMAN	4	4	4	sp|P62995|TRA2B_HUMAN Transformer-2 protein homolog beta OS=Homo sapiens OX=9606 GN=TRA2B PE=1 SV=1	1	4	4	4	2	3	4	2	1	3	2	2	3	4	2	1	3	2	2	3	4	2	1	3	2	16.3	16.3	16.3	33.665	288	288	0	19.26	3.5651	1.5946	23.509	17	7	Leave out requantified	2.93	4.4007	1.5223	1.166
1038	sp|P63000|RAC1_HUMAN;sp|P60763|RAC3_HUMAN	sp|P63000|RAC1_HUMAN;sp|P60763|RAC3_HUMAN	8;5	7;4	4;2	sp|P63000|RAC1_HUMAN Ras-related C3 botulinum toxin substrate 1 OS=Homo sapiens OX=9606 GN=RAC1 PE=1 SV=1;sp|P60763|RAC3_HUMAN Ras-related C3 botulinum toxin substrate 3 OS=Homo sapiens OX=9606 GN=RAC3 PE=1 SV=1	2	8	7	4	4	6	6	7	7	7	6	4	5	6	6	6	6	5	2	3	4	4	4	3	3	44.8	39.1	23.4	21.45	192	192;192	0	21.658	2.6492	1.112	48.536	46	9	Leave out requantified	2.888	2.6468	2.8856	2.4894
1039	sp|P63010|AP2B1_HUMAN	sp|P63010|AP2B1_HUMAN	24	24	12	sp|P63010|AP2B1_HUMAN AP-2 complex subunit beta OS=Homo sapiens OX=9606 GN=AP2B1 PE=1 SV=1	1	24	24	12	13	13	14	12	15	15	12	13	13	14	12	15	15	12	5	8	7	7	6	8	7	30.2	30.2	15.7	104.55	937	937	0	75.308	3.0341	1.2762	18.423	100	49	Leave out requantified	3.2239	3.4097	4.5042	3.2237
1040	sp|Q5JWF2|GNAS1_HUMAN;sp|P63092|GNAS2_HUMAN;sp|P38405|GNAL_HUMAN	sp|Q5JWF2|GNAS1_HUMAN;sp|P63092|GNAS2_HUMAN	8;8;2	7;7;1	7;7;1	sp|Q5JWF2|GNAS1_HUMAN Guanine nucleotide-binding protein G(s) subunit alpha isoforms XLas OS=Homo sapiens OX=9606 GN=GNAS PE=1 SV=2;sp|P63092|GNAS2_HUMAN Guanine nucleotide-binding protein G(s) subunit alpha isoforms short OS=Homo sapiens OX=9606 GN=GNAS P	3	8	7	7	2	6	3	3	4	4	5	2	6	3	3	4	4	4	2	6	3	3	4	4	4	8.9	7.8	7.8	111.02	1037	1037;394;381	0	13.54	3.4035	1.6123	31.67	22	14	Leave out requantified	4.0357	3.2099	4.4942	3.1508
1041	sp|P63104|1433Z_HUMAN	sp|P63104|1433Z_HUMAN	27	24	21	sp|P63104|1433Z_HUMAN 14-3-3 protein zeta/delta OS=Homo sapiens OX=9606 GN=YWHAZ PE=1 SV=1	1	27	24	21	21	21	23	23	21	24	21	18	18	20	20	19	21	19	15	15	17	17	16	18	16	81.6	81.6	75.1	27.745	245	245	0	323.31	1.8352	0.96665	22.79	223	19	Leave out requantified	1.8456	1.8034	1.9663	1.8878
1042	sp|P63151|2ABA_HUMAN;sp|Q9Y2T4|2ABG_HUMAN;sp|Q66LE6|2ABD_HUMAN	sp|P63151|2ABA_HUMAN	5;1;1	5;1;1	5;1;1	sp|P63151|2ABA_HUMAN Serine/threonine-protein phosphatase 2A 55 kDa regulatory subunit B alpha isoform OS=Homo sapiens OX=9606 GN=PPP2R2A PE=1 SV=1	3	5	5	5	2	1	1	3	1	2	4	2	1	1	3	1	2	4	2	1	1	3	1	2	4	11.6	11.6	11.6	51.691	447	447;447;453	0	6.757	2.8073	1.2651	70.084	14	5	Leave out requantified	1.8069	2.6642	4.3948	2.9365
1043	sp|P63167|DYL1_HUMAN;sp|Q96FJ2|DYL2_HUMAN	sp|P63167|DYL1_HUMAN;sp|Q96FJ2|DYL2_HUMAN	3;2	3;2	3;2	sp|P63167|DYL1_HUMAN Dynein light chain 1, cytoplasmic OS=Homo sapiens OX=9606 GN=DYNLL1 PE=1 SV=1;sp|Q96FJ2|DYL2_HUMAN Dynein light chain 2, cytoplasmic OS=Homo sapiens OX=9606 GN=DYNLL2 PE=1 SV=1	2	3	3	3	1	1	2	1	3	2	1	1	1	2	1	3	2	1	1	1	2	1	3	2	1	32.6	32.6	32.6	10.366	89	89;89	0	5.1307	3.2159	1.2544	13.459	11	4	Leave out requantified	2.8618	3.5758	1.6314	3.2159
1044	sp|P63172|DYLT1_HUMAN	sp|P63172|DYLT1_HUMAN	1	1	1	sp|P63172|DYLT1_HUMAN Dynein light chain Tctex-type 1 OS=Homo sapiens OX=9606 GN=DYNLT1 PE=1 SV=1	1	1	1	1	1	1	1	1	0	1	0	1	1	1	1	0	1	0	1	1	1	1	0	1	0	15.9	15.9	15.9	12.452	113	113	0	5.3157	1.5585	0.62876	60.97	7	6	Median	0.89389	1.0652	1.5585	2.1242
1045	sp|P63173|RL38_HUMAN	sp|P63173|RL38_HUMAN	2	2	2	sp|P63173|RL38_HUMAN 60S ribosomal protein L38 OS=Homo sapiens OX=9606 GN=RPL38 PE=1 SV=2	1	2	2	2	0	2	2	2	1	0	1	0	2	2	2	1	0	1	0	2	2	2	1	0	1	35.7	35.7	35.7	8.2178	70	70	0	7.4019	1.5063	0.94607	80.697	6	3	Median		1.266	3.0424	0.95351
1046	sp|P63208|SKP1_HUMAN	sp|P63208|SKP1_HUMAN	2	2	2	sp|P63208|SKP1_HUMAN S-phase kinase-associated protein 1 OS=Homo sapiens OX=9606 GN=SKP1 PE=1 SV=2	1	2	2	2	1	1	1	1	2	2	1	1	1	1	1	2	2	1	1	1	1	1	2	2	1	17.8	17.8	17.8	18.658	163	163	0	19.515	2.0843	0.88711	23.444	8	1	Median	1.5552	2.8177	2.1744	2.3492
1047	sp|P63220|RS21_HUMAN	sp|P63220|RS21_HUMAN	5	5	5	sp|P63220|RS21_HUMAN 40S ribosomal protein S21 OS=Homo sapiens OX=9606 GN=RPS21 PE=1 SV=1	1	5	5	5	1	1	3	3	4	2	1	1	1	3	3	4	2	1	1	1	3	3	4	2	1	53	53	53	9.1113	83	83	0	19.561	1.7048	0.85858	31.893	15	5	Leave out requantified	1.6467	1.4452	1.3873	1.7665
1048	sp|P63241|IF5A1_HUMAN;sp|Q6IS14|IF5AL_HUMAN;sp|Q9GZV4|IF5A2_HUMAN	sp|P63241|IF5A1_HUMAN;sp|Q6IS14|IF5AL_HUMAN	15;8;6	15;8;6	15;8;6	sp|P63241|IF5A1_HUMAN Eukaryotic translation initiation factor 5A-1 OS=Homo sapiens OX=9606 GN=EIF5A PE=1 SV=2;sp|Q6IS14|IF5AL_HUMAN Eukaryotic translation initiation factor 5A-1-like OS=Homo sapiens OX=9606 GN=EIF5AL1 PE=2 SV=2	3	15	15	15	12	13	12	11	13	12	11	12	13	12	11	13	12	11	12	13	12	11	13	12	11	72.7	72.7	72.7	16.832	154	154;154;153	0	254.34	2.1611	1.1466	37.846	132	28	Leave out requantified	2.5488	2.3975	2.541	2.4038
1049	sp|P63244|RACK1_HUMAN	sp|P63244|RACK1_HUMAN	20	20	20	sp|P63244|RACK1_HUMAN Receptor of activated protein C kinase 1 OS=Homo sapiens OX=9606 GN=RACK1 PE=1 SV=3	1	20	20	20	15	14	13	14	13	13	11	15	14	13	14	13	13	11	15	14	13	14	13	13	11	82.6	82.6	82.6	35.076	317	317	0	185.17	4.5995	1.8486	39.166	94	38	Leave out requantified	4.7039	2.9589	5.7647	5.813
1050	sp|P63261|ACTG_HUMAN	sp|P63261|ACTG_HUMAN	37	37	1	sp|P63261|ACTG_HUMAN Actin, cytoplasmic 2 OS=Homo sapiens OX=9606 GN=ACTG1 PE=1 SV=1	1	37	37	1	26	28	29	33	28	29	27	26	28	29	33	28	29	27	1	1	1	1	1	1	1	78.4	78.4	4.5	41.792	375	375	0	323.31	3.7671	2.6206	42.035	507	149	Leave out requantified	3.7889	3.7324	4.262	3.9636
1051	sp|P63279|UBC9_HUMAN	sp|P63279|UBC9_HUMAN	3	3	3	sp|P63279|UBC9_HUMAN SUMO-conjugating enzyme UBC9 OS=Homo sapiens OX=9606 GN=UBE2I PE=1 SV=1	1	3	3	3	1	0	1	1	0	1	0	1	0	1	1	0	1	0	1	0	1	1	0	1	0	32.3	32.3	32.3	18.007	158	158	0	3.7087	1.502	0.62783	14.501	3	3	Median			1.4123	1.6744
1052	sp|P67775|PP2AA_HUMAN;sp|P62714|PP2AB_HUMAN	sp|P67775|PP2AA_HUMAN;sp|P62714|PP2AB_HUMAN	12;11	12;11	10;9	sp|P67775|PP2AA_HUMAN Serine/threonine-protein phosphatase 2A catalytic subunit alpha isoform OS=Homo sapiens OX=9606 GN=PPP2CA PE=1 SV=1;sp|P62714|PP2AB_HUMAN Serine/threonine-protein phosphatase 2A catalytic subunit beta isoform OS=Homo sapiens OX=9606 G	2	12	12	10	6	8	7	6	8	6	6	6	8	7	6	8	6	6	5	7	6	5	7	6	5	47.9	47.9	43	35.594	309	309;309	0	111.74	3.1787	1.2712	36.61	47	14	Leave out requantified	3.095	3.4304	3.7484	3.3732
1053	sp|P67809|YBOX1_HUMAN;sp|Q9Y2T7|YBOX2_HUMAN;sp|P16989|YBOX3_HUMAN	sp|P67809|YBOX1_HUMAN	8;2;2	8;2;2	8;2;2	sp|P67809|YBOX1_HUMAN Y-box-binding protein 1 OS=Homo sapiens OX=9606 GN=YBX1 PE=1 SV=3	3	8	8	8	7	8	6	5	6	7	6	7	8	6	5	6	7	6	7	8	6	5	6	7	6	45.1	45.1	45.1	35.924	324	324;364;372	0	56.792	1.3936	0.71954	32.527	49	3	Leave out requantified	1.1406	1.1016	1.4415	1.3936
1054	sp|P67812|SC11A_HUMAN	sp|P67812|SC11A_HUMAN	4	4	4	sp|P67812|SC11A_HUMAN Signal peptidase complex catalytic subunit SEC11A OS=Homo sapiens OX=9606 GN=SEC11A PE=1 SV=1	1	4	4	4	2	1	2	2	1	2	1	2	1	2	2	1	2	1	2	1	2	2	1	2	1	20.1	20.1	20.1	20.625	179	179	0	6.7146	3.0963	1.1498	12.651	10	4	Leave out requantified	3.0963	3.1457	2.1911	2.1343
1055	sp|P67870|CSK2B_HUMAN	sp|P67870|CSK2B_HUMAN	1	1	1	sp|P67870|CSK2B_HUMAN Casein kinase II subunit beta OS=Homo sapiens OX=9606 GN=CSNK2B PE=1 SV=1	1	1	1	1	1	1	1	1	1	1	1	1	1	1	1	1	1	1	1	1	1	1	1	1	1	5.1	5.1	5.1	24.942	215	215	0	4.1656	2.3765	0.96441	26.567	7	4	Median	2.3765	3.5553	2.121	1.8302
1056	sp|P67936|TPM4_HUMAN;sp|Q2TAC2|CCD57_HUMAN	sp|P67936|TPM4_HUMAN	27;1	27;1	14;1	sp|P67936|TPM4_HUMAN Tropomyosin alpha-4 chain OS=Homo sapiens OX=9606 GN=TPM4 PE=1 SV=3	2	27	27	14	20	20	20	17	19	16	14	20	20	20	17	19	16	14	8	9	11	7	9	7	5	70.6	70.6	50.8	28.521	248	248;915	0	198.68	2.1367	1.1409	53.574	151	32	Leave out requantified	1.9827	2.009	2.4832	2.2871
1057	sp|P68133|ACTS_HUMAN;sp|P68032|ACTC_HUMAN;sp|P63267|ACTH_HUMAN;sp|P62736|ACTA_HUMAN	sp|P68133|ACTS_HUMAN;sp|P68032|ACTC_HUMAN;sp|P63267|ACTH_HUMAN;sp|P62736|ACTA_HUMAN	23;23;21;21	3;3;2;2	3;3;2;2	sp|P68133|ACTS_HUMAN Actin, alpha skeletal muscle OS=Homo sapiens OX=9606 GN=ACTA1 PE=1 SV=1;sp|P68032|ACTC_HUMAN Actin, alpha cardiac muscle 1 OS=Homo sapiens OX=9606 GN=ACTC1 PE=1 SV=1;sp|P63267|ACTH_HUMAN Actin, gamma-enteric smooth muscle OS=Homo sapie	4	23	3	3	15	17	16	20	17	19	18	2	2	2	2	3	3	2	2	2	2	2	3	3	2	37.1	8.8	8.8	42.051	377	377;377;376;377	0	103.42	3.2669	1.7153	3.2239	62	17	Leave out requantified	2.4996	3.2989	3.6239	3.3556
1058	sp|P68036|UB2L3_HUMAN;sp|A0A1B0GUS4|UB2L5_HUMAN	sp|P68036|UB2L3_HUMAN;sp|A0A1B0GUS4|UB2L5_HUMAN	2;1	2;1	2;1	sp|P68036|UB2L3_HUMAN Ubiquitin-conjugating enzyme E2 L3 OS=Homo sapiens OX=9606 GN=UBE2L3 PE=1 SV=1;sp|A0A1B0GUS4|UB2L5_HUMAN Ubiquitin-conjugating enzyme E2 L5 OS=Homo sapiens OX=9606 GN=UBE2L5 PE=2 SV=1	2	2	2	2	1	0	1	1	1	1	2	1	0	1	1	1	1	2	1	0	1	1	1	1	2	24	24	24	17.861	154	154;154	0	7.6073	1.7413	0.7336	28.1	7	3	Median	1.8787		1.7534	1.7413
1059	sp|P68104|EF1A1_HUMAN;sp|Q5VTE0|EF1A3_HUMAN	sp|P68104|EF1A1_HUMAN;sp|Q5VTE0|EF1A3_HUMAN	39;37	39;37	23;22	sp|P68104|EF1A1_HUMAN Elongation factor 1-alpha 1 OS=Homo sapiens OX=9606 GN=EEF1A1 PE=1 SV=1;sp|Q5VTE0|EF1A3_HUMAN Putative elongation factor 1-alpha-like 3 OS=Homo sapiens OX=9606 GN=EEF1A1P5 PE=5 SV=1	2	39	39	23	28	28	30	32	28	28	33	28	28	30	32	28	28	33	18	14	16	16	16	16	21	81	81	47.2	50.14	462	462;462	0	323.31	3.8538	2.0027	54.066	360	120	Leave out requantified	3.983	3.9668	4.4699	4.1786
1060	sp|P68363|TBA1B_HUMAN;sp|Q9H853|TBA4B_HUMAN	sp|P68363|TBA1B_HUMAN	32;1	32;1	0;0	sp|P68363|TBA1B_HUMAN Tubulin alpha-1B chain OS=Homo sapiens OX=9606 GN=TUBA1B PE=1 SV=1	2	32	32	0	26	27	28	28	29	27	27	26	27	28	28	29	27	27	0	0	0	0	0	0	0	82	82	0	50.151	451	451;241	0	323.31	5.8714	2.9203	33.026	320	75	Leave out requantified	5.9302	6.0533	6.729	6.4273
1061	sp|P68366|TBA4A_HUMAN	sp|P68366|TBA4A_HUMAN	25	3	3	sp|P68366|TBA4A_HUMAN Tubulin alpha-4A chain OS=Homo sapiens OX=9606 GN=TUBA4A PE=1 SV=1	1	25	3	3	21	21	22	22	21	22	21	1	1	1	1	0	2	1	1	1	1	1	0	2	1	59.8	9.8	9.8	49.924	448	448	0	12.026	5.6492	1.973	161.14	5	4	Linear	5.6312		2.5307
1062	sp|P68371|TBB4B_HUMAN;sp|P04350|TBB4A_HUMAN	sp|P68371|TBB4B_HUMAN;sp|P04350|TBB4A_HUMAN	26;19	26;19	4;3	sp|P68371|TBB4B_HUMAN Tubulin beta-4B chain OS=Homo sapiens OX=9606 GN=TUBB4B PE=1 SV=1;sp|P04350|TBB4A_HUMAN Tubulin beta-4A chain OS=Homo sapiens OX=9606 GN=TUBB4A PE=1 SV=2	2	26	26	4	25	25	25	24	24	23	23	25	25	25	24	24	23	23	4	4	4	4	4	4	4	67	67	13	49.83	445	445;444	0	323.31	5.7919	2.8122	40.972	309	105	Leave out requantified	6.0478	5.6775	7.2784	6.7632
1063	sp|P68400|CSK21_HUMAN;sp|Q8NEV1|CSK23_HUMAN	sp|P68400|CSK21_HUMAN;sp|Q8NEV1|CSK23_HUMAN	8;7	8;7	8;7	sp|P68400|CSK21_HUMAN Casein kinase II subunit alpha OS=Homo sapiens OX=9606 GN=CSNK2A1 PE=1 SV=1;sp|Q8NEV1|CSK23_HUMAN Casein kinase II subunit alpha 3 OS=Homo sapiens OX=9606 GN=CSNK2A3 PE=1 SV=2	2	8	8	8	5	5	6	5	5	5	6	5	5	6	5	5	5	6	5	5	6	5	5	5	6	32	32	32	45.143	391	391;391	0	57.815	2.7013	1.1557	36.756	37	18	Leave out requantified	2.6476	2.6841	2.7773	2.8619
1064	sp|P68402|PA1B2_HUMAN	sp|P68402|PA1B2_HUMAN	3	3	3	sp|P68402|PA1B2_HUMAN Platelet-activating factor acetylhydrolase IB subunit alpha2 OS=Homo sapiens OX=9606 GN=PAFAH1B2 PE=1 SV=1	1	3	3	3	2	3	2	1	2	2	2	2	3	2	1	2	2	2	2	3	2	1	2	2	2	28.8	28.8	28.8	25.569	229	229	0	56.842	1.995	0.70417	23.591	14	0	Leave out requantified	1.8952	2.0209	2.2018	1.9885
1065	sp|Q71DI3|H32_HUMAN;sp|Q16695|H31T_HUMAN;sp|P84243|H33_HUMAN;sp|P68431|H31_HUMAN;sp|Q6NXT2|H3C_HUMAN	sp|Q71DI3|H32_HUMAN;sp|Q16695|H31T_HUMAN;sp|P84243|H33_HUMAN;sp|P68431|H31_HUMAN;sp|Q6NXT2|H3C_HUMAN	4;4;4;4;2	4;4;4;4;2	2;2;2;2;0	sp|Q71DI3|H32_HUMAN Histone H3.2 OS=Homo sapiens OX=9606 GN=H3C15 PE=1 SV=3;sp|Q16695|H31T_HUMAN Histone H3.1t OS=Homo sapiens OX=9606 GN=H3-4 PE=1 SV=3;sp|P84243|H33_HUMAN Histone H3.3 OS=Homo sapiens OX=9606 GN=H3-3A PE=1 SV=2;sp|P68431|H31_HUMAN Histone	5	4	4	2	4	3	2	4	3	2	4	4	3	2	4	3	2	4	2	2	1	2	1	1	2	19.9	19.9	8.1	15.388	136	136;136;136;136;135	0	5.9819	1.9421	0.95026	43.472	25	2	Leave out requantified	2.2304	1.8377	2.1075	1.8267
1067	sp|P78344|IF4G2_HUMAN	sp|P78344|IF4G2_HUMAN	7	7	7	sp|P78344|IF4G2_HUMAN Eukaryotic translation initiation factor 4 gamma 2 OS=Homo sapiens OX=9606 GN=EIF4G2 PE=1 SV=1	1	7	7	7	3	6	5	3	5	3	4	3	6	5	3	5	3	4	3	6	5	3	5	3	4	7.6	7.6	7.6	102.36	907	907	0	11.861	2.4857	1.106	6.5631	26	17	Leave out requantified	2.3658	1.0851	2.6562	3.951
1068	sp|P78346|RPP30_HUMAN	sp|P78346|RPP30_HUMAN	2	2	2	sp|P78346|RPP30_HUMAN Ribonuclease P protein subunit p30 OS=Homo sapiens OX=9606 GN=RPP30 PE=1 SV=1	1	2	2	2	1	2	1	0	0	1	0	1	2	1	0	0	1	0	1	2	1	0	0	1	0	7.1	7.1	7.1	29.321	268	268	0.0039954	1.3936	2.4547	1.0769	88.285	5	5	Median	2.4547	1.0467	2.9213
1069	sp|P78347|GTF2I_HUMAN;sp|Q86UP8|GTD2A_HUMAN;sp|Q6EKJ0|GTD2B_HUMAN	sp|P78347|GTF2I_HUMAN	6;1;1	6;1;1	6;1;1	sp|P78347|GTF2I_HUMAN General transcription factor II-I OS=Homo sapiens OX=9606 GN=GTF2I PE=1 SV=2	3	6	6	6	3	2	1	3	1	4	2	3	2	1	3	1	4	2	3	2	1	3	1	4	2	6.4	6.4	6.4	112.42	998	998;949;949	0	3.905	1.9	1.3017	23.334	15	11	Leave out requantified	1.2329	1.5616	1.4611	3.1143
1070	sp|P78371|TCPB_HUMAN	sp|P78371|TCPB_HUMAN	36	36	36	sp|P78371|TCPB_HUMAN T-complex protein 1 subunit beta OS=Homo sapiens OX=9606 GN=CCT2 PE=1 SV=4	1	36	36	36	26	26	24	24	24	26	27	26	26	24	24	24	26	27	26	26	24	24	24	26	27	80.4	80.4	80.4	57.488	535	535	0	323.31	3.46	1.3547	26.459	245	96	Leave out requantified	3.6078	3.407	3.8229	3.698
1071	sp|P78417|GSTO1_HUMAN	sp|P78417|GSTO1_HUMAN	15	15	15	sp|P78417|GSTO1_HUMAN Glutathione S-transferase omega-1 OS=Homo sapiens OX=9606 GN=GSTO1 PE=1 SV=2	1	15	15	15	10	11	11	10	9	11	10	10	11	11	10	9	11	10	10	11	11	10	9	11	10	63.1	63.1	63.1	27.566	241	241	0	71.226	2.0909	0.98026	39.258	73	8	Leave out requantified	2.2238	2.0909	2.467	2.0155
1072	sp|P78527|PRKDC_HUMAN	sp|P78527|PRKDC_HUMAN	45	45	45	sp|P78527|PRKDC_HUMAN DNA-dependent protein kinase catalytic subunit OS=Homo sapiens OX=9606 GN=PRKDC PE=1 SV=3	1	45	45	45	16	22	20	22	17	17	17	16	22	20	22	17	17	17	16	22	20	22	17	17	17	13.3	13.3	13.3	469.08	4128	4128	0	129.09	4.4534	2.0352	54.917	112	91	Leave out requantified	2.7521	4.6587	6.0049	4.5587
1075	sp|P83731|RL24_HUMAN	sp|P83731|RL24_HUMAN	6	6	6	sp|P83731|RL24_HUMAN 60S ribosomal protein L24 OS=Homo sapiens OX=9606 GN=RPL24 PE=1 SV=1	1	6	6	6	2	2	5	3	5	4	3	2	2	5	3	5	4	3	2	2	5	3	5	4	3	37.6	37.6	37.6	17.779	157	157	0	12.451	6.1278	2.6825	27.608	25	7	Leave out requantified	7.405	7.0478	5.7578	7.1436
1076	sp|Q969Q0|RL36L_HUMAN;sp|P83881|RL36A_HUMAN	sp|Q969Q0|RL36L_HUMAN;sp|P83881|RL36A_HUMAN	1;1	1;1	1;1	sp|Q969Q0|RL36L_HUMAN 60S ribosomal protein L36a-like OS=Homo sapiens OX=9606 GN=RPL36AL PE=1 SV=3;sp|P83881|RL36A_HUMAN 60S ribosomal protein L36a OS=Homo sapiens OX=9606 GN=RPL36A PE=1 SV=2	2	1	1	1	1	1	1	1	1	1	1	1	1	1	1	1	1	1	1	1	1	1	1	1	1	8.5	8.5	8.5	12.469	106	106;106	0	2.5524	4.7996	1.9262	11.425	6	1	Median	4.362	4.6948	5.5764	4.9069
1077	sp|P84085|ARF5_HUMAN	sp|P84085|ARF5_HUMAN	10	4	4	sp|P84085|ARF5_HUMAN ADP-ribosylation factor 5 OS=Homo sapiens OX=9606 GN=ARF5 PE=1 SV=2	1	10	4	4	6	5	6	7	5	7	7	2	1	2	2	0	2	2	2	1	2	2	0	2	2	57.2	27.2	27.2	20.529	180	180	0	15.895	4.3099	1.8841	21.954	9	3	Leave out requantified	5.0894	3.2369	5.8423	3.755
1078	sp|P84090|ERH_HUMAN	sp|P84090|ERH_HUMAN	2	2	2	sp|P84090|ERH_HUMAN Enhancer of rudimentary homolog OS=Homo sapiens OX=9606 GN=ERH PE=1 SV=1	1	2	2	2	1	1	1	1	1	1	1	1	1	1	1	1	1	1	1	1	1	1	1	1	1	26.9	26.9	26.9	12.259	104	104	0	16.313	1.3759	0.64279	80.071	4	4	Median	1.201			2.9983
1079	sp|P84095|RHOG_HUMAN	sp|P84095|RHOG_HUMAN	6	5	5	sp|P84095|RHOG_HUMAN Rho-related GTP-binding protein RhoG OS=Homo sapiens OX=9606 GN=RHOG PE=1 SV=1	1	6	5	5	1	3	0	2	4	3	2	1	2	0	1	3	2	1	1	2	0	1	3	2	1	39.8	34	34	21.308	191	191	0	17.114	1.1779	0.73433	112.59	5	5	Median	1.1283	1.5789
1080	sp|P84098|RL19_HUMAN	sp|P84098|RL19_HUMAN	10	10	10	sp|P84098|RL19_HUMAN 60S ribosomal protein L19 OS=Homo sapiens OX=9606 GN=RPL19 PE=1 SV=1	1	10	10	10	7	9	5	6	5	9	7	7	9	5	6	5	9	7	7	9	5	6	5	9	7	36.2	36.2	36.2	23.466	196	196	0	46.431	4.399	2.0391	41.95	50	15	Leave out requantified	5.1616	4.7264	5.8823	5.5422
1081	sp|P84103|SRSF3_HUMAN	sp|P84103|SRSF3_HUMAN	4	4	4	sp|P84103|SRSF3_HUMAN Serine/arginine-rich splicing factor 3 OS=Homo sapiens OX=9606 GN=SRSF3 PE=1 SV=1	1	4	4	4	4	3	3	3	4	4	2	4	3	3	3	4	4	2	4	3	3	3	4	4	2	34.8	34.8	34.8	19.329	164	164	0	16.078	5.2365	2.3233	10.877	23	9	Leave out requantified	4.7116	4.2945	5.4256	3.4543
1082	sp|P98179|RBM3_HUMAN	sp|P98179|RBM3_HUMAN	5	5	5	sp|P98179|RBM3_HUMAN RNA-binding protein 3 OS=Homo sapiens OX=9606 GN=RBM3 PE=1 SV=1	1	5	5	5	4	3	4	4	3	4	5	4	3	4	4	3	4	5	4	3	4	4	3	4	5	55.4	55.4	55.4	17.17	157	157	0	70.018	4.2241	1.827	24.088	31	8	Leave out requantified	4.3843	4.8728	4.0733	4.4245
1083	sp|Q00325|MPCP_HUMAN	sp|Q00325|MPCP_HUMAN	11	11	11	sp|Q00325|MPCP_HUMAN Phosphate carrier protein, mitochondrial OS=Homo sapiens OX=9606 GN=SLC25A3 PE=1 SV=2	1	11	11	11	8	7	7	9	7	6	6	8	7	7	9	7	6	6	8	7	7	9	7	6	6	29.6	29.6	29.6	40.094	362	362	0	77.344	3.4038	1.2409	23.231	54	27	Leave out requantified	3.4672	3.2062	3.8203	3.404
1084	sp|Q00341|VIGLN_HUMAN	sp|Q00341|VIGLN_HUMAN	9	9	9	sp|Q00341|VIGLN_HUMAN Vigilin OS=Homo sapiens OX=9606 GN=HDLBP PE=1 SV=2	1	9	9	9	3	3	6	4	3	0	2	3	3	6	4	3	0	2	3	3	6	4	3	0	2	10.9	10.9	10.9	141.45	1268	1268	0	30.59	0.43659	0.14457	118.02	19	14	Median	1.2407	0.26548	0.64516	0.52657
1086	sp|Q00610|CLH1_HUMAN	sp|Q00610|CLH1_HUMAN	73	73	57	sp|Q00610|CLH1_HUMAN Clathrin heavy chain 1 OS=Homo sapiens OX=9606 GN=CLTC PE=1 SV=5	1	73	73	57	49	49	49	54	50	51	51	49	49	49	54	50	51	51	37	37	40	41	37	39	40	52.4	52.4	43.1	191.61	1675	1675	0	323.31	4.3885	1.8319	30.382	406	194	Leave out requantified	4.6672	4.6855	5.3648	4.8961
1087	sp|Q00688|FKBP3_HUMAN	sp|Q00688|FKBP3_HUMAN	2	2	2	sp|Q00688|FKBP3_HUMAN Peptidyl-prolyl cis-trans isomerase FKBP3 OS=Homo sapiens OX=9606 GN=FKBP3 PE=1 SV=1	1	2	2	2	1	2	0	1	1	1	1	1	2	0	1	1	1	1	1	2	0	1	1	1	1	9.8	9.8	9.8	25.177	224	224	0	3.7612	2.7216	1.2438	82.928	7	5	Median	2.6856	1.1186		4.8309
1088	sp|Q00765|REEP5_HUMAN	sp|Q00765|REEP5_HUMAN	5	5	5	sp|Q00765|REEP5_HUMAN Receptor expression-enhancing protein 5 OS=Homo sapiens OX=9606 GN=REEP5 PE=1 SV=3	1	5	5	5	4	4	2	2	3	2	3	4	4	2	2	3	2	3	4	4	2	2	3	2	3	25.4	25.4	25.4	21.493	189	189	0	8.1372	1.4581	0.74568	23.74	20	1	Leave out requantified	1.5262	1.3875	1.4985	1.3678
1089	sp|Q00796|DHSO_HUMAN	sp|Q00796|DHSO_HUMAN	2	2	2	sp|Q00796|DHSO_HUMAN Sorbitol dehydrogenase OS=Homo sapiens OX=9606 GN=SORD PE=1 SV=4	1	2	2	2	1	0	1	1	2	0	1	1	0	1	1	2	0	1	1	0	1	1	2	0	1	10.1	10.1	10.1	38.324	357	357	0	4.9378	1.8661	0.90165	20.014	6	5	Median	2.213		1.8651	1.8671
1090	sp|Q00839|HNRPU_HUMAN	sp|Q00839|HNRPU_HUMAN	30	30	30	sp|Q00839|HNRPU_HUMAN Heterogeneous nuclear ribonucleoprotein U OS=Homo sapiens OX=9606 GN=HNRNPU PE=1 SV=6	1	30	30	30	23	22	26	21	20	18	19	23	22	26	21	20	18	19	23	22	26	21	20	18	19	42.1	42.1	42.1	90.583	825	825	0	202.56	5.5695	2.4308	35.531	182	84	Leave out requantified	5.3117	5.7933	7.6865	6.899
1091	sp|Q01082|SPTB2_HUMAN;sp|P11277|SPTB1_HUMAN	sp|Q01082|SPTB2_HUMAN	81;1	81;1	77;0	sp|Q01082|SPTB2_HUMAN Spectrin beta chain, non-erythrocytic 1 OS=Homo sapiens OX=9606 GN=SPTBN1 PE=1 SV=2	2	81	81	77	49	46	50	46	45	48	45	49	46	50	46	45	48	45	49	44	47	44	43	47	44	44.4	44.4	42.7	274.61	2364	2364;2137	0	323.31	2.2593	0.96461	29.147	342	89	Leave out requantified	2.4052	2.2392	2.3991	2.5457
1093	sp|Q01105|SET_HUMAN;sp|P0DME0|SETLP_HUMAN	sp|Q01105|SET_HUMAN;sp|P0DME0|SETLP_HUMAN	6;4	6;4	6;4	sp|Q01105|SET_HUMAN Protein SET OS=Homo sapiens OX=9606 GN=SET PE=1 SV=3;sp|P0DME0|SETLP_HUMAN Protein SETSIP OS=Homo sapiens OX=9606 GN=SETSIP PE=1 SV=1	2	6	6	6	4	3	4	5	5	6	5	4	3	4	5	5	6	5	4	3	4	5	5	6	5	29.3	29.3	29.3	33.488	290	290;302	0	128.81	1.1259	0.47657	20.541	36	2	Leave out requantified	1.1126	1.168	1.1922	1.1389
1094	sp|Q01130|SRSF2_HUMAN;sp|Q9BRL6|SRSF8_HUMAN	sp|Q01130|SRSF2_HUMAN	5;2	5;2	5;2	sp|Q01130|SRSF2_HUMAN Serine/arginine-rich splicing factor 2 OS=Homo sapiens OX=9606 GN=SRSF2 PE=1 SV=4	2	5	5	5	3	1	1	4	4	3	3	3	1	1	4	4	3	3	3	1	1	4	4	3	3	26.7	26.7	26.7	25.476	221	221;282	0	19.725	1.2942	0.56359	27.646	18	1	Leave out requantified	0.90117	0.6479	0.78727	0.93944
1095	sp|Q01469|FABP5_HUMAN	sp|Q01469|FABP5_HUMAN	3	3	3	sp|Q01469|FABP5_HUMAN Fatty acid-binding protein 5 OS=Homo sapiens OX=9606 GN=FABP5 PE=1 SV=3	1	3	3	3	1	2	1	2	1	2	2	1	2	1	2	1	2	2	1	2	1	2	1	2	2	23.7	23.7	23.7	15.164	135	135	0	17.162	0.93756	0.45499	33.147	10	4	Leave out requantified	1.6677	1.6619	1.1179	0.98505
1096	sp|Q01518|CAP1_HUMAN	sp|Q01518|CAP1_HUMAN	26	26	25	sp|Q01518|CAP1_HUMAN Adenylyl cyclase-associated protein 1 OS=Homo sapiens OX=9606 GN=CAP1 PE=1 SV=5	1	26	26	25	20	23	20	18	19	18	21	20	23	20	18	19	18	21	19	22	19	17	18	17	20	58.7	58.7	57.1	51.901	475	475	0	278.36	1.6989	0.74684	29.82	203	28	Leave out requantified	1.805	1.7512	1.9147	1.7149
1097	sp|Q01581|HMCS1_HUMAN;sp|P54868|HMCS2_HUMAN	sp|Q01581|HMCS1_HUMAN	8;1	8;1	8;1	sp|Q01581|HMCS1_HUMAN Hydroxymethylglutaryl-CoA synthase, cytoplasmic OS=Homo sapiens OX=9606 GN=HMGCS1 PE=1 SV=2	2	8	8	8	3	3	3	4	4	6	3	3	3	3	4	4	6	3	3	3	3	4	4	6	3	21.2	21.2	21.2	57.293	520	520;508	0	19.587	1.8856	0.93067	23.96	23	13	Leave out requantified	1.3144	1.9252	1.7435	2.0227
1099	sp|Q01650|LAT1_HUMAN;sp|Q9UM01|YLAT1_HUMAN;sp|Q92536|YLAT2_HUMAN	sp|Q01650|LAT1_HUMAN;sp|Q9UM01|YLAT1_HUMAN;sp|Q92536|YLAT2_HUMAN	2;1;1	2;1;1	2;1;1	sp|Q01650|LAT1_HUMAN Large neutral amino acids transporter small subunit 1 OS=Homo sapiens OX=9606 GN=SLC7A5 PE=1 SV=2;sp|Q9UM01|YLAT1_HUMAN Y+L amino acid transporter 1 OS=Homo sapiens OX=9606 GN=SLC7A7 PE=1 SV=2;sp|Q92536|YLAT2_HUMAN Y+L amino acid trans	3	2	2	2	2	2	2	2	2	1	2	2	2	2	2	2	1	2	2	2	2	2	2	1	2	4.9	4.9	4.9	55.01	507	507;511;515	0	6.8272	2.9281	1.2865	19.924	13	5	Leave out requantified	3.563	3.279	2.9388	2.6959
1100	sp|Q01813|PFKAP_HUMAN	sp|Q01813|PFKAP_HUMAN	32	32	30	sp|Q01813|PFKAP_HUMAN ATP-dependent 6-phosphofructokinase, platelet type OS=Homo sapiens OX=9606 GN=PFKP PE=1 SV=2	1	32	32	30	21	23	21	21	26	23	24	21	23	21	21	26	23	24	19	21	19	19	24	21	22	49.2	49.2	45.7	85.595	784	784	0	323.31	4.655	2.1452	30.585	161	78	Leave out requantified	5.0035	4.6744	6.8246	5.8839
1101	sp|Q02218|ODO1_HUMAN;sp|Q9ULD0|OGDHL_HUMAN	sp|Q02218|ODO1_HUMAN	17;5	17;5	17;5	sp|Q02218|ODO1_HUMAN 2-oxoglutarate dehydrogenase, mitochondrial OS=Homo sapiens OX=9606 GN=OGDH PE=1 SV=3	2	17	17	17	6	7	7	7	9	8	10	6	7	7	7	9	8	10	6	7	7	7	9	8	10	23.2	23.2	23.2	115.93	1023	1023;1010	0	33.585	2.7735	1.4442	71.526	51	24	Leave out requantified	3.274	3.9347	4.8984	4.1501
1102	sp|Q02413|DSG1_HUMAN	sp|Q02413|DSG1_HUMAN	4	4	4	sp|Q02413|DSG1_HUMAN Desmoglein-1 OS=Homo sapiens OX=9606 GN=DSG1 PE=1 SV=2	1	4	4	4	2	0	0	3	1	0	0	2	0	0	3	1	0	0	2	0	0	3	1	0	0	6.4	6.4	6.4	113.75	1049	1049	0	9.1452	0.65414	0.43529	89.209	5	5	Median	0.45434			1.2183
1103	sp|Q02543|RL18A_HUMAN	sp|Q02543|RL18A_HUMAN	10	10	10	sp|Q02543|RL18A_HUMAN 60S ribosomal protein L18a OS=Homo sapiens OX=9606 GN=RPL18A PE=1 SV=2	1	10	10	10	6	9	6	7	5	7	4	6	9	6	7	5	7	4	6	9	6	7	5	7	4	49.4	49.4	49.4	20.762	176	176	0	33.346	5.7841	2.3548	28.296	45	22	Leave out requantified	5.4123	6.7743	4.529	6.9197
1104	sp|Q02750|MP2K1_HUMAN	sp|Q02750|MP2K1_HUMAN	7	3	3	sp|Q02750|MP2K1_HUMAN Dual specificity mitogen-activated protein kinase kinase 1 OS=Homo sapiens OX=9606 GN=MAP2K1 PE=1 SV=2	1	7	3	3	3	4	3	4	5	2	5	0	1	0	1	2	0	2	0	1	0	1	2	0	2	20.9	9.2	9.2	43.439	393	393	0	4.238	2.3406	1.0219	34.56	6	1	Leave out requantified		3.3285		2.4814
1105	sp|Q02790|FKBP4_HUMAN	sp|Q02790|FKBP4_HUMAN	20	20	20	sp|Q02790|FKBP4_HUMAN Peptidyl-prolyl cis-trans isomerase FKBP4 OS=Homo sapiens OX=9606 GN=FKBP4 PE=1 SV=3	1	20	20	20	11	10	12	14	13	14	12	11	10	12	14	13	14	12	11	10	12	14	13	14	12	53.2	53.2	53.2	51.804	459	459	0	79.94	1.5521	0.67236	32.553	104	22	Leave out requantified	1.4852	1.5763	1.5187	1.5988
1106	sp|Q02809|PLOD1_HUMAN	sp|Q02809|PLOD1_HUMAN	3	3	3	sp|Q02809|PLOD1_HUMAN Procollagen-lysine,2-oxoglutarate 5-dioxygenase 1 OS=Homo sapiens OX=9606 GN=PLOD1 PE=1 SV=2	1	3	3	3	1	1	2	0	3	0	2	1	1	2	0	3	0	2	1	1	2	0	3	0	2	6.7	6.7	6.7	83.549	727	727	0	3.5297	1.3149	0.54487	69.442	8	8	Median	2.5212	1.6006	1.5013
1107	sp|Q02818|NUCB1_HUMAN;sp|P80303|NUCB2_HUMAN	sp|Q02818|NUCB1_HUMAN	3;1	3;1	3;1	sp|Q02818|NUCB1_HUMAN Nucleobindin-1 OS=Homo sapiens OX=9606 GN=NUCB1 PE=1 SV=4	2	3	3	3	2	0	0	1	2	2	1	2	0	0	1	2	2	1	2	0	0	1	2	2	1	6.3	6.3	6.3	53.879	461	461;420	0	3.4277	1.5392	0.73937	47.08	8	3	Leave out requantified	1.3225			1.5254
1108	sp|Q02878|RL6_HUMAN	sp|Q02878|RL6_HUMAN	11	11	11	sp|Q02878|RL6_HUMAN 60S ribosomal protein L6 OS=Homo sapiens OX=9606 GN=RPL6 PE=1 SV=3	1	11	11	11	7	8	10	9	7	6	8	7	8	10	9	7	6	8	7	8	10	9	7	6	8	36.8	36.8	36.8	32.728	288	288	0	96.472	5.5825	2.4439	33.877	66	31	Leave out requantified	5.966	5.5564	7.1878	5.9307
1109	sp|Q02978|M2OM_HUMAN	sp|Q02978|M2OM_HUMAN	5	5	5	sp|Q02978|M2OM_HUMAN Mitochondrial 2-oxoglutarate/malate carrier protein OS=Homo sapiens OX=9606 GN=SLC25A11 PE=1 SV=3	1	5	5	5	2	1	3	3	2	1	1	2	1	3	3	2	1	1	2	1	3	3	2	1	1	16.2	16.2	16.2	34.061	314	314	0	5.8828	3.2167	1.1956	15.213	12	8	Leave out requantified	2.3954	3.5079	3.3365	2.947
1110	sp|Q03001|DYST_HUMAN	sp|Q03001|DYST_HUMAN	6	6	6	sp|Q03001|DYST_HUMAN Dystonin OS=Homo sapiens OX=9606 GN=DST PE=1 SV=4	1	6	6	6	0	1	0	1	3	0	1	0	1	0	1	3	0	1	0	1	0	1	3	0	1	1.1	1.1	1.1	860.65	7570	7570	0	7.5137	1.2657	0.56021	71.763	4	2	Median		0.78162		2.0495
1111	sp|Q03135|CAV1_HUMAN;sp|P56539|CAV3_HUMAN	sp|Q03135|CAV1_HUMAN	10;2	10;2	10;2	sp|Q03135|CAV1_HUMAN Caveolin-1 OS=Homo sapiens OX=9606 GN=CAV1 PE=1 SV=4	2	10	10	10	7	6	7	6	7	9	6	7	6	7	6	7	9	6	7	6	7	6	7	9	6	56.2	56.2	56.2	20.471	178	178;151	0	111.67	2.1291	1.0305	32.581	68	9	Leave out requantified	2.333	1.9968	2.3616	2.409
1113	sp|Q04323|UBXN1_HUMAN	sp|Q04323|UBXN1_HUMAN	5	5	5	sp|Q04323|UBXN1_HUMAN UBX domain-containing protein 1 OS=Homo sapiens OX=9606 GN=UBXN1 PE=1 SV=2	1	5	5	5	1	2	1	3	2	2	1	1	2	1	3	2	2	1	1	2	1	3	2	2	1	23.9	23.9	23.9	33.325	297	297	0	32.012	1.4319	0.65885	3.1249	9	5	Leave out requantified	1.8608	1.6318		1.9658
1114	sp|Q04446|GLGB_HUMAN	sp|Q04446|GLGB_HUMAN	19	19	19	sp|Q04446|GLGB_HUMAN 1,4-alpha-glucan-branching enzyme OS=Homo sapiens OX=9606 GN=GBE1 PE=1 SV=3	1	19	19	19	11	10	9	8	11	9	8	11	10	9	8	11	9	8	11	10	9	8	11	9	8	37.6	37.6	37.6	80.473	702	702	0	57.211	3.135	1.353	22.883	53	25	Leave out requantified	3.4405	3.3116	3.8253	1.9901
1115	sp|Q04637|IF4G1_HUMAN;sp|O43432|IF4G3_HUMAN;REV__sp|Q8NEG2|CG057_HUMAN	sp|Q04637|IF4G1_HUMAN	31;6;1	31;6;1	31;6;1	sp|Q04637|IF4G1_HUMAN Eukaryotic translation initiation factor 4 gamma 1 OS=Homo sapiens OX=9606 GN=EIF4G1 PE=1 SV=4	3	31	31	31	19	16	16	18	17	16	20	19	16	16	18	17	16	20	19	16	16	18	17	16	20	20.6	20.6	20.6	175.49	1599	1599;1585;295	0	123.02	3.3183	1.6143	38.663	114	44	Leave out requantified	3.9673	4.0825	3.8163	4.1446
1116	sp|Q04760|LGUL_HUMAN	sp|Q04760|LGUL_HUMAN	12	12	12	sp|Q04760|LGUL_HUMAN Lactoylglutathione lyase OS=Homo sapiens OX=9606 GN=GLO1 PE=1 SV=4	1	12	12	12	7	10	8	8	9	11	7	7	10	8	8	9	11	7	7	10	8	8	9	11	7	84.8	84.8	84.8	20.777	184	184	0	54.188	1.4923	0.64332	24.783	71	19	Leave out requantified	1.6907	2.0229	1.5188	1.479
1117	sp|Q04837|SSBP_HUMAN	sp|Q04837|SSBP_HUMAN	8	8	8	sp|Q04837|SSBP_HUMAN Single-stranded DNA-binding protein, mitochondrial OS=Homo sapiens OX=9606 GN=SSBP1 PE=1 SV=1	1	8	8	8	7	4	6	6	5	6	6	7	4	6	6	5	6	6	7	4	6	6	5	6	6	58.8	58.8	58.8	17.259	148	148	0	100.91	3.0303	1.3249	25.512	49	17	Leave out requantified	3.2803	2.9263	3.2862	3.0303
1118	sp|Q04917|1433F_HUMAN	sp|Q04917|1433F_HUMAN	16	12	12	sp|Q04917|1433F_HUMAN 14-3-3 protein eta OS=Homo sapiens OX=9606 GN=YWHAH PE=1 SV=4	1	16	12	12	13	13	16	13	13	14	10	9	9	12	9	10	10	7	9	9	12	9	10	10	7	50.8	43.9	43.9	28.218	246	246	0	80.095	1.8651	0.79512	24.196	68	6	Leave out requantified	1.8865	1.7479	2.1345	1.8663
1121	sp|Q06124|PTN11_HUMAN	sp|Q06124|PTN11_HUMAN	7	7	7	sp|Q06124|PTN11_HUMAN Tyrosine-protein phosphatase non-receptor type 11 OS=Homo sapiens OX=9606 GN=PTPN11 PE=1 SV=3	1	7	7	7	3	3	2	2	1	2	1	3	3	2	2	1	2	1	3	3	2	2	1	2	1	13.8	13.8	13.8	68.01	593	593	0	9.2428	2.33	1.0218	53.792	13	7	Leave out requantified	2.33	1.8411	2.9895	2.5024
1123	sp|Q06210|GFPT1_HUMAN;sp|O94808|GFPT2_HUMAN	sp|Q06210|GFPT1_HUMAN	10;3	10;3	10;3	sp|Q06210|GFPT1_HUMAN Glutamine--fructose-6-phosphate aminotransferase [isomerizing] 1 OS=Homo sapiens OX=9606 GN=GFPT1 PE=1 SV=3	2	10	10	10	6	7	5	6	5	6	3	6	7	5	6	5	6	3	6	7	5	6	5	6	3	18.6	18.6	18.6	78.806	699	699;682	0	73.046	3.7723	1.5007	30.318	37	18	Leave out requantified	4.3427	4.2906	3.8502	3.4975
1124	sp|Q06265|EXOS9_HUMAN	sp|Q06265|EXOS9_HUMAN	2	2	2	sp|Q06265|EXOS9_HUMAN Exosome complex component RRP45 OS=Homo sapiens OX=9606 GN=EXOSC9 PE=1 SV=3	1	2	2	2	1	2	1	1	1	0	0	1	2	1	1	1	0	0	1	2	1	1	1	0	0	5.9	5.9	5.9	48.948	439	439	0	2.489	3.3007	1.3499	27.613	5	4	Median	3.3007	1.9632	3.3552	2.1151
1125	sp|Q06323|PSME1_HUMAN	sp|Q06323|PSME1_HUMAN	15	15	15	sp|Q06323|PSME1_HUMAN Proteasome activator complex subunit 1 OS=Homo sapiens OX=9606 GN=PSME1 PE=1 SV=1	1	15	15	15	9	10	10	11	10	12	8	9	10	10	11	10	12	8	9	10	10	11	10	12	8	59.4	59.4	59.4	28.723	249	249	0	59.415	1.8336	0.74114	26.818	78	17	Leave out requantified	1.8632	1.7988	1.8348	1.9159
1126	sp|Q06330|SUH_HUMAN	sp|Q06330|SUH_HUMAN	1	1	1	sp|Q06330|SUH_HUMAN Recombining binding protein suppressor of hairless OS=Homo sapiens OX=9606 GN=RBPJ PE=1 SV=3	1	1	1	1	0	1	1	1	1	0	0	0	1	1	1	1	0	0	0	1	1	1	1	0	0	2.2	2.2	2.2	55.637	500	500	0	2.3056	0.12674	0.062147	16.409	3	3	Plateau		0.16906		0.12287
1127	sp|Q06481|APLP2_HUMAN	sp|Q06481|APLP2_HUMAN	1	1	1	sp|Q06481|APLP2_HUMAN Amyloid-like protein 2 OS=Homo sapiens OX=9606 GN=APLP2 PE=1 SV=2	1	1	1	1	1	1	1	1	0	1	0	1	1	1	1	0	1	0	1	1	1	1	0	1	0	2.1	2.1	2.1	86.955	763	763	0	6.0453	1.9114	0.85951	9.2195	6	4	Median	1.7272	2.1345	2.0752	2.1046
1128	sp|Q06830|PRDX1_HUMAN	sp|Q06830|PRDX1_HUMAN	18	15	14	sp|Q06830|PRDX1_HUMAN Peroxiredoxin-1 OS=Homo sapiens OX=9606 GN=PRDX1 PE=1 SV=1	1	18	15	14	14	14	15	16	13	14	12	11	11	12	13	11	12	10	10	10	11	12	10	11	9	78.9	69.3	63.8	22.11	199	199	0	81.513	1.8781	0.94579	26.247	91	8	Leave out requantified	1.873	1.906	2.117	2.2292
1129	sp|Q07020|RL18_HUMAN	sp|Q07020|RL18_HUMAN	8	8	8	sp|Q07020|RL18_HUMAN 60S ribosomal protein L18 OS=Homo sapiens OX=9606 GN=RPL18 PE=1 SV=2	1	8	8	8	4	6	3	4	4	3	4	4	6	3	4	4	3	4	4	6	3	4	4	3	4	43.1	43.1	43.1	21.634	188	188	0	30.342	7.6867	3.2436	29.358	27	10	Leave out requantified	5.388	4.994	7.5273	7.8166
1130	sp|Q07021|C1QBP_HUMAN	sp|Q07021|C1QBP_HUMAN	5	5	5	sp|Q07021|C1QBP_HUMAN Complement component 1 Q subcomponent-binding protein, mitochondrial OS=Homo sapiens OX=9606 GN=C1QBP PE=1 SV=1	1	5	5	5	5	5	5	4	5	5	4	5	5	5	4	5	5	4	5	5	5	4	5	5	4	31.6	31.6	31.6	31.362	282	282	0	66.066	1.9635	0.88238	36.372	42	8	Leave out requantified	2.1318	2.0785	2.1505	2.139
1131	sp|Q07065|CKAP4_HUMAN	sp|Q07065|CKAP4_HUMAN	16	16	16	sp|Q07065|CKAP4_HUMAN Cytoskeleton-associated protein 4 OS=Homo sapiens OX=9606 GN=CKAP4 PE=1 SV=2	1	16	16	16	10	9	7	9	8	11	8	10	9	7	9	8	11	8	10	9	7	9	8	11	8	35.5	35.5	35.5	66.022	602	602	0	68.281	2.7686	1.4038	30.766	59	35	Leave out requantified	2.182	2.9487	2.9788	3.3585
1132	sp|Q07666|KHDR1_HUMAN;sp|Q5VWX1|KHDR2_HUMAN;sp|O75525|KHDR3_HUMAN	sp|Q07666|KHDR1_HUMAN	6;2;1	6;2;1	6;2;1	sp|Q07666|KHDR1_HUMAN KH domain-containing, RNA-binding, signal transduction-associated protein 1 OS=Homo sapiens OX=9606 GN=KHDRBS1 PE=1 SV=1	3	6	6	6	4	1	2	2	4	3	4	4	1	2	2	4	3	4	4	1	2	2	4	3	4	19.2	19.2	19.2	48.227	443	443;349;346	0	13.134	2.793	1.4875	49.967	18	10	Leave out requantified	2.1956	2.8924	1.6497	2.8827
1133	sp|Q07812|BAX_HUMAN	sp|Q07812|BAX_HUMAN	2	2	2	sp|Q07812|BAX_HUMAN Apoptosis regulator BAX OS=Homo sapiens OX=9606 GN=BAX PE=1 SV=1	1	2	2	2	2	2	1	2	2	2	1	2	2	1	2	2	2	1	2	2	1	2	2	2	1	13.5	13.5	13.5	21.184	192	192	0	17.796	1.823	0.79005	5.3821	11	6	Leave out requantified	1.8394	1.1715	1.083	1.2183
1134	sp|Q07817|B2CL1_HUMAN	sp|Q07817|B2CL1_HUMAN	3	3	3	sp|Q07817|B2CL1_HUMAN Bcl-2-like protein 1 OS=Homo sapiens OX=9606 GN=BCL2L1 PE=1 SV=1	1	3	3	3	1	1	1	1	3	1	2	1	1	1	1	3	1	2	1	1	1	1	3	1	2	12	12	12	26.049	233	233	0	3.2411	1.7831	0.73549	2.9385	10	1	Leave out requantified	1.9298	1.5551	2.0599	1.9239
1135	sp|Q07866|KLC1_HUMAN;sp|Q9H0B6|KLC2_HUMAN	sp|Q07866|KLC1_HUMAN	6;2	6;2	6;2	sp|Q07866|KLC1_HUMAN Kinesin light chain 1 OS=Homo sapiens OX=9606 GN=KLC1 PE=1 SV=2	2	6	6	6	1	5	3	4	4	3	3	1	5	3	4	4	3	3	1	5	3	4	4	3	3	15	15	15	65.309	573	573;622	0	21.855	3.8988	1.7353	5.4761	24	17	Leave out requantified	5.535	2.4033	5.8099	1.1757
1136	sp|Q07955|SRSF1_HUMAN	sp|Q07955|SRSF1_HUMAN	7	7	6	sp|Q07955|SRSF1_HUMAN Serine/arginine-rich splicing factor 1 OS=Homo sapiens OX=9606 GN=SRSF1 PE=1 SV=2	1	7	7	6	5	5	4	5	5	5	5	5	5	4	5	5	5	5	4	4	3	4	4	4	4	32.3	32.3	29.4	27.744	248	248	0	24.014	3.2642	1.3495	22.286	37	5	Leave out requantified	3.2642	3.5796	3.9691	3.6623
1137	sp|Q07960|RHG01_HUMAN	sp|Q07960|RHG01_HUMAN	8	8	8	sp|Q07960|RHG01_HUMAN Rho GTPase-activating protein 1 OS=Homo sapiens OX=9606 GN=ARHGAP1 PE=1 SV=1	1	8	8	8	5	4	7	4	5	6	5	5	4	7	4	5	6	5	5	4	7	4	5	6	5	24.6	24.6	24.6	50.435	439	439	0	35.514	2.0207	0.77721	17.677	32	5	Leave out requantified	1.5905	1.8849	1.9811	1.9165
1138	sp|Q08209|PP2BA_HUMAN;sp|P16298|PP2BB_HUMAN;sp|P48454|PP2BC_HUMAN	sp|Q08209|PP2BA_HUMAN;sp|P16298|PP2BB_HUMAN	10;5;2	10;5;2	10;5;2	sp|Q08209|PP2BA_HUMAN Serine/threonine-protein phosphatase 2B catalytic subunit alpha isoform OS=Homo sapiens OX=9606 GN=PPP3CA PE=1 SV=1;sp|P16298|PP2BB_HUMAN Serine/threonine-protein phosphatase 2B catalytic subunit beta isoform OS=Homo sapiens OX=9606 G	3	10	10	10	7	7	5	4	7	4	6	7	7	5	4	7	4	6	7	7	5	4	7	4	6	21.7	21.7	21.7	58.687	521	521;524;512	0	21.439	2.074	0.73848	23.111	39	11	Leave out requantified	1.8735	1.8579	1.7457	1.6094
1139	sp|Q08211|DHX9_HUMAN	sp|Q08211|DHX9_HUMAN	32	32	32	sp|Q08211|DHX9_HUMAN ATP-dependent RNA helicase A OS=Homo sapiens OX=9606 GN=DHX9 PE=1 SV=4	1	32	32	32	19	21	17	15	18	20	19	19	21	17	15	18	20	19	19	21	17	15	18	20	19	30.6	30.6	30.6	140.96	1270	1270	0	150.25	4.3916	1.8063	28.266	125	69	Leave out requantified	5.9666	4.8934	6.6048	5.4517
1140	sp|Q08257|QOR_HUMAN	sp|Q08257|QOR_HUMAN	1	1	1	sp|Q08257|QOR_HUMAN Quinone oxidoreductase OS=Homo sapiens OX=9606 GN=CRYZ PE=1 SV=1	1	1	1	1	0	1	0	0	1	1	0	0	1	0	0	1	1	0	0	1	0	0	1	1	0	3.6	3.6	3.6	35.206	329	329	0.0065646	1.0952	1.9789	0.92067	11.527	3	3	Median		1.9789
1142	sp|Q08380|LG3BP_HUMAN	sp|Q08380|LG3BP_HUMAN	14	14	14	sp|Q08380|LG3BP_HUMAN Galectin-3-binding protein OS=Homo sapiens OX=9606 GN=LGALS3BP PE=1 SV=1	1	14	14	14	11	10	12	11	11	12	12	11	10	12	11	11	12	12	11	10	12	11	11	12	12	32.8	32.8	32.8	65.33	585	585	0	204.93	1.5005	0.60086	23.117	96	7	Leave out requantified	1.6181	1.7014	1.6795	1.5143
1143	sp|Q08431|MFGM_HUMAN	sp|Q08431|MFGM_HUMAN	1	1	1	sp|Q08431|MFGM_HUMAN Lactadherin OS=Homo sapiens OX=9606 GN=MFGE8 PE=1 SV=3	1	1	1	1	1	1	1	1	1	1	1	1	1	1	1	1	1	1	1	1	1	1	1	1	1	3.9	3.9	3.9	43.104	387	387	0	6.355	1.0672	0.46735	13.823	7	1	Median	1.5169	1.0436	1.0672	1.2377
1144	sp|Q08623|HDHD1_HUMAN	sp|Q08623|HDHD1_HUMAN	1	1	1	sp|Q08623|HDHD1_HUMAN Pseudouridine-5-phosphatase OS=Homo sapiens OX=9606 GN=PUDP PE=1 SV=3	1	1	1	1	1	0	0	0	1	1	0	1	0	0	0	1	1	0	1	0	0	0	1	1	0	5.3	5.3	5.3	25.249	228	228	0	4.765	0.71688	0.27486	20.003	3	3	Plateau	0.66892
1145	sp|Q08722|CD47_HUMAN	sp|Q08722|CD47_HUMAN	2	2	2	sp|Q08722|CD47_HUMAN Leukocyte surface antigen CD47 OS=Homo sapiens OX=9606 GN=CD47 PE=1 SV=1	1	2	2	2	1	1	2	1	2	1	1	1	1	2	1	2	1	1	1	1	2	1	2	1	1	5.9	5.9	5.9	35.213	323	323	0	1.9202	2.3012	0.89657	14.788	8	0	Leave out requantified	2.3863	2.523	2.8461	2.7378
1147	sp|Q08945|SSRP1_HUMAN	sp|Q08945|SSRP1_HUMAN	5	5	5	sp|Q08945|SSRP1_HUMAN FACT complex subunit SSRP1 OS=Homo sapiens OX=9606 GN=SSRP1 PE=1 SV=1	1	5	5	5	1	4	1	1	0	2	2	1	4	1	1	0	2	2	1	4	1	1	0	2	2	8.5	8.5	8.5	81.074	709	709	0	12.191	2.4546	1.0768	64.103	11	11	Median	4.8672	1.5111	4.7181	1.8424
1148	sp|Q08J23|NSUN2_HUMAN	sp|Q08J23|NSUN2_HUMAN	6	6	6	sp|Q08J23|NSUN2_HUMAN RNA cytosine C(5)-methyltransferase NSUN2 OS=Homo sapiens OX=9606 GN=NSUN2 PE=1 SV=2	1	6	6	6	4	2	1	2	2	1	1	4	2	1	2	2	1	1	4	2	1	2	2	1	1	8.9	8.9	8.9	86.47	767	767	0	5.6959	0.58712	0.23202	114.68	11	10	Median	0.65078	0.31783	0.14604	1.4413
1149	sp|Q09028|RBBP4_HUMAN	sp|Q09028|RBBP4_HUMAN	13	6	6	sp|Q09028|RBBP4_HUMAN Histone-binding protein RBBP4 OS=Homo sapiens OX=9606 GN=RBBP4 PE=1 SV=3	1	13	6	6	7	7	8	8	8	8	9	2	4	2	3	4	3	4	2	4	2	3	4	3	4	51.8	39.3	39.3	47.655	425	425	0	30.164	1.4999	0.82552	34.372	24	10	Leave out requantified	1.4478	1.0103	2.0348	2.0428
1150	sp|Q09161|NCBP1_HUMAN	sp|Q09161|NCBP1_HUMAN	6	6	6	sp|Q09161|NCBP1_HUMAN Nuclear cap-binding protein subunit 1 OS=Homo sapiens OX=9606 GN=NCBP1 PE=1 SV=1	1	6	6	6	2	3	1	2	3	5	3	2	3	1	2	3	5	3	2	3	1	2	3	5	3	7.8	7.8	7.8	91.838	790	790	0	7.4631	1.5909	0.70466	102.69	15	13	Median	2.3254	1.8461	1.4623	0.87192
1151	sp|Q09666|AHNK_HUMAN;sp|P48552|NRIP1_HUMAN	sp|Q09666|AHNK_HUMAN	127;1	127;1	127;1	sp|Q09666|AHNK_HUMAN Neuroblast differentiation-associated protein AHNAK OS=Homo sapiens OX=9606 GN=AHNAK PE=1 SV=2	2	127	127	127	72	75	89	83	89	76	66	72	75	89	83	89	76	66	72	75	89	83	89	76	66	44.2	44.2	44.2	629.09	5890	5890;1158	0	323.31	2.3488	1.0509	30.844	583	237	Leave out requantified	2.3581	2.2528	2.8476	2.6354
1153	sp|Q10471|GALT2_HUMAN	sp|Q10471|GALT2_HUMAN	5	5	5	sp|Q10471|GALT2_HUMAN Polypeptide N-acetylgalactosaminyltransferase 2 OS=Homo sapiens OX=9606 GN=GALNT2 PE=1 SV=1	1	5	5	5	2	2	1	3	0	3	2	2	2	1	3	0	3	2	2	2	1	3	0	3	2	12.1	12.1	12.1	64.732	571	571	0	6.9809	1.6281	0.79908	53.019	10	8	Median	2.3214	2.1698	3.1316	1.4838
1154	sp|Q10567|AP1B1_HUMAN	sp|Q10567|AP1B1_HUMAN	15	3	3	sp|Q10567|AP1B1_HUMAN AP-1 complex subunit beta-1 OS=Homo sapiens OX=9606 GN=AP1B1 PE=1 SV=2	1	15	3	3	10	6	9	6	11	7	5	2	1	2	1	2	0	0	2	1	2	1	2	0	0	17.7	3.4	3.4	104.64	949	949	0.00058824	1.6635	1.9446	0.87685	134.53	7	6	Median	2.345	0.20238	2.6819	1.9171
1156	sp|Q10713|MPPA_HUMAN	sp|Q10713|MPPA_HUMAN	3	3	3	sp|Q10713|MPPA_HUMAN Mitochondrial-processing peptidase subunit alpha OS=Homo sapiens OX=9606 GN=PMPCA PE=1 SV=2	1	3	3	3	0	2	0	0	1	0	2	0	2	0	0	1	0	2	0	2	0	0	1	0	2	9	9	9	58.252	525	525	0	3.4625	2.9453	1.4702	76.258	5	2	Median		2.2996
1157	sp|Q12765|SCRN1_HUMAN	sp|Q12765|SCRN1_HUMAN	6	6	6	sp|Q12765|SCRN1_HUMAN Secernin-1 OS=Homo sapiens OX=9606 GN=SCRN1 PE=1 SV=2	1	6	6	6	3	3	4	3	3	3	4	3	3	4	3	3	3	4	3	3	4	3	3	3	4	19.3	19.3	19.3	46.382	414	414	0	16.05	1.947	0.92256	32.905	22	4	Leave out requantified	2.2701	1.947	2.0251	1.9279
1159	sp|Q12792|TWF1_HUMAN	sp|Q12792|TWF1_HUMAN	5	4	4	sp|Q12792|TWF1_HUMAN Twinfilin-1 OS=Homo sapiens OX=9606 GN=TWF1 PE=1 SV=3	1	5	4	4	3	1	1	2	3	2	1	2	0	0	1	2	1	0	2	0	0	1	2	1	0	16.3	14.3	14.3	40.282	350	350	0	13.488	2.1059	1.0668	14.766	5	2	Leave out requantified	1.1014			2.0156
1160	sp|Q12797|ASPH_HUMAN	sp|Q12797|ASPH_HUMAN	1	1	1	sp|Q12797|ASPH_HUMAN Aspartyl/asparaginyl beta-hydroxylase OS=Homo sapiens OX=9606 GN=ASPH PE=1 SV=3	1	1	1	1	1	1	1	1	1	1	0	1	1	1	1	1	1	0	1	1	1	1	1	1	0	2.4	2.4	2.4	85.862	758	758	0	8.2564	1.7564	0.89637	9.0494	4	4	Linear	2.0274	1.751
1161	sp|Q12849|GRSF1_HUMAN	sp|Q12849|GRSF1_HUMAN	5	5	5	sp|Q12849|GRSF1_HUMAN G-rich sequence factor 1 OS=Homo sapiens OX=9606 GN=GRSF1 PE=1 SV=3	1	5	5	5	2	3	3	2	3	2	1	2	3	3	2	3	2	1	2	3	3	2	3	2	1	12.9	12.9	12.9	53.126	480	480	0	7.9248	2.8508	1.2093	24.524	14	9	Leave out requantified	1.0792	1.3517	2.514	1.3422
1162	sp|Q12874|SF3A3_HUMAN	sp|Q12874|SF3A3_HUMAN	7	7	7	sp|Q12874|SF3A3_HUMAN Splicing factor 3A subunit 3 OS=Homo sapiens OX=9606 GN=SF3A3 PE=1 SV=1	1	7	7	7	5	6	3	6	3	5	4	5	6	3	6	3	5	4	5	6	3	6	3	5	4	17.8	17.8	17.8	58.848	501	501	0	18.411	2.3384	1.159	42.424	35	15	Leave out requantified	2.9107	3.1493	3.1271	2.8403
1163	sp|Q12904|AIMP1_HUMAN	sp|Q12904|AIMP1_HUMAN	4	4	4	sp|Q12904|AIMP1_HUMAN Aminoacyl tRNA synthase complex-interacting multifunctional protein 1 OS=Homo sapiens OX=9606 GN=AIMP1 PE=1 SV=2	1	4	4	4	0	2	3	2	3	4	2	0	2	3	2	3	4	2	0	2	3	2	3	4	2	19.2	19.2	19.2	34.352	312	312	0	13.759	1.4223	0.64505	13.946	16	11	Leave out requantified		1.9425	1.451	0.90758
1164	sp|Q12905|ILF2_HUMAN	sp|Q12905|ILF2_HUMAN	18	18	18	sp|Q12905|ILF2_HUMAN Interleukin enhancer-binding factor 2 OS=Homo sapiens OX=9606 GN=ILF2 PE=1 SV=2	1	18	18	18	10	13	11	12	14	11	11	10	13	11	12	14	11	11	10	13	11	12	14	11	11	64.1	64.1	64.1	43.062	390	390	0	193.74	3.4603	1.5146	24.491	113	49	Leave out requantified	4.1729	3.6095	4.2684	3.6497
1165	sp|Q12906|ILF3_HUMAN;sp|Q96SI9|STRBP_HUMAN	sp|Q12906|ILF3_HUMAN	16;2	16;2	16;2	sp|Q12906|ILF3_HUMAN Interleukin enhancer-binding factor 3 OS=Homo sapiens OX=9606 GN=ILF3 PE=1 SV=3	2	16	16	16	9	11	10	9	11	12	12	9	11	10	9	11	12	12	9	11	10	9	11	12	12	27.3	27.3	27.3	95.337	894	894;672	0	126.09	3.7684	1.6419	33.995	80	32	Leave out requantified	4.77	3.9741	4.5746	5.3014
1166	sp|Q12907|LMAN2_HUMAN	sp|Q12907|LMAN2_HUMAN	7	7	7	sp|Q12907|LMAN2_HUMAN Vesicular integral-membrane protein VIP36 OS=Homo sapiens OX=9606 GN=LMAN2 PE=1 SV=1	1	7	7	7	2	1	2	2	1	4	2	2	1	2	2	1	4	2	2	1	2	2	1	4	2	25.8	25.8	25.8	40.228	356	356	0	34.786	1.7753	0.75254	64.348	13	6	Leave out requantified	1.2417	1.4487	1.7886	1.0241
1167	sp|Q12931|TRAP1_HUMAN	sp|Q12931|TRAP1_HUMAN	8	8	8	sp|Q12931|TRAP1_HUMAN Heat shock protein 75 kDa, mitochondrial OS=Homo sapiens OX=9606 GN=TRAP1 PE=1 SV=3	1	8	8	8	7	5	5	5	3	4	3	7	5	5	5	3	4	3	7	5	5	5	3	4	3	16.8	16.8	16.8	80.109	704	704	0	30.605	2.4788	1.0561	17.233	31	16	Leave out requantified	2.2474	2.53	3.4996	2.379
1168	sp|Q12959|DLG1_HUMAN	sp|Q12959|DLG1_HUMAN	4	4	4	sp|Q12959|DLG1_HUMAN Disks large homolog 1 OS=Homo sapiens OX=9606 GN=DLG1 PE=1 SV=2	1	4	4	4	0	0	2	2	0	2	2	0	0	2	2	0	2	2	0	0	2	2	0	2	2	9.5	9.5	9.5	100.45	904	904	0	6.8216	0.98181	0.52351	67.722	7	7	Median			0.94867	0.71784
1169	sp|Q12972|PP1R8_HUMAN	sp|Q12972|PP1R8_HUMAN	1	1	1	sp|Q12972|PP1R8_HUMAN Nuclear inhibitor of protein phosphatase 1 OS=Homo sapiens OX=9606 GN=PPP1R8 PE=1 SV=2	1	1	1	1	0	1	1	1	1	1	0	0	1	1	1	1	1	0	0	1	1	1	1	1	0	5.1	5.1	5.1	38.478	351	351	0	11.453	1.2219	0.50262	57.088	5	4	Median		1.2219	1.145	3.3362
1170	sp|Q12996|CSTF3_HUMAN	sp|Q12996|CSTF3_HUMAN	4	4	4	sp|Q12996|CSTF3_HUMAN Cleavage stimulation factor subunit 3 OS=Homo sapiens OX=9606 GN=CSTF3 PE=1 SV=1	1	4	4	4	0	0	4	0	2	2	0	0	0	4	0	2	2	0	0	0	4	0	2	2	0	7	7	7	82.921	717	717	0	5.6253	1.7217	0.83606	44.254	7	7	Median			2.2677
1171	sp|Q13011|ECH1_HUMAN	sp|Q13011|ECH1_HUMAN	1	1	1	sp|Q13011|ECH1_HUMAN Delta(3,5)-Delta(2,4)-dienoyl-CoA isomerase, mitochondrial OS=Homo sapiens OX=9606 GN=ECH1 PE=1 SV=2	1	1	1	1	1	0	0	0	1	1	1	1	0	0	0	1	1	1	1	0	0	0	1	1	1	4.9	4.9	4.9	35.816	328	328	0	15.814	1.3778	0.57743	26.136	4	4	Median	2.176
1172	sp|Q13045|FLII_HUMAN	sp|Q13045|FLII_HUMAN	3	3	3	sp|Q13045|FLII_HUMAN Protein flightless-1 homolog OS=Homo sapiens OX=9606 GN=FLII PE=1 SV=2	1	3	3	3	1	2	1	2	1	0	0	1	2	1	2	1	0	0	1	2	1	2	1	0	0	2.8	2.8	2.8	144.75	1269	1269	0	4.6338	1.4737	0.59349	104.48	7	6	Median	4.4106	3.2784	0.52976	1.4697
1173	sp|Q13085|ACACA_HUMAN	sp|Q13085|ACACA_HUMAN	7	7	7	sp|Q13085|ACACA_HUMAN Acetyl-CoA carboxylase 1 OS=Homo sapiens OX=9606 GN=ACACA PE=1 SV=2	1	7	7	7	5	5	3	4	2	3	4	5	5	3	4	2	3	4	5	5	3	4	2	3	4	3.7	3.7	3.7	265.55	2346	2346	0	10.63	2.1571	0.8964	141.49	24	23	Median	2.1398	2.8217	1.0733	2.1745
1174	sp|Q13098|CSN1_HUMAN	sp|Q13098|CSN1_HUMAN	9	9	9	sp|Q13098|CSN1_HUMAN COP9 signalosome complex subunit 1 OS=Homo sapiens OX=9606 GN=GPS1 PE=1 SV=4	1	9	9	9	4	5	3	4	6	2	3	4	5	3	4	6	2	3	4	5	3	4	6	2	3	20.2	20.2	20.2	55.536	491	491	0	11.219	1.9505	0.90063	44.151	25	9	Leave out requantified	2.042	2.1001	1.2203	1.9005
1176	sp|Q13144|EI2BE_HUMAN	sp|Q13144|EI2BE_HUMAN	2	2	2	sp|Q13144|EI2BE_HUMAN Translation initiation factor eIF-2B subunit epsilon OS=Homo sapiens OX=9606 GN=EIF2B5 PE=1 SV=3	1	2	2	2	1	1	1	1	2	2	1	1	1	1	1	2	2	1	1	1	1	1	2	2	1	3.1	3.1	3.1	80.379	721	721	0	8.0323	2.0324	0.86692	51.378	4	4	Median	3.942
1177	sp|Q13148|TADBP_HUMAN	sp|Q13148|TADBP_HUMAN	4	4	4	sp|Q13148|TADBP_HUMAN TAR DNA-binding protein 43 OS=Homo sapiens OX=9606 GN=TARDBP PE=1 SV=1	1	4	4	4	1	3	2	3	2	2	1	1	3	2	3	2	2	1	1	3	2	3	2	2	1	17.9	17.9	17.9	44.739	414	414	0	28.718	3.0046	1.3355	35.196	12	10	Median		3.1416	2.5996	4.7583
1178	sp|Q13151|ROA0_HUMAN	sp|Q13151|ROA0_HUMAN	7	7	7	sp|Q13151|ROA0_HUMAN Heterogeneous nuclear ribonucleoprotein A0 OS=Homo sapiens OX=9606 GN=HNRNPA0 PE=1 SV=1	1	7	7	7	4	5	5	5	5	4	5	4	5	5	5	5	4	5	4	5	5	5	5	4	5	26.9	26.9	26.9	30.84	305	305	0	66.482	4.8397	2.111	54.529	29	7	Leave out requantified	4.8397	4.9483	5.559	6.8449
1179	sp|Q13155|AIMP2_HUMAN	sp|Q13155|AIMP2_HUMAN	5	5	5	sp|Q13155|AIMP2_HUMAN Aminoacyl tRNA synthase complex-interacting multifunctional protein 2 OS=Homo sapiens OX=9606 GN=AIMP2 PE=1 SV=2	1	5	5	5	2	4	3	4	3	1	2	2	4	3	4	3	1	2	2	4	3	4	3	1	2	21.9	21.9	21.9	35.348	320	320	0	25.862	4.5948	1.9563	73.248	17	14	Median	2.4518	5.0284	1.9999	5.571
1180	sp|Q13162|PRDX4_HUMAN	sp|Q13162|PRDX4_HUMAN	18	18	15	sp|Q13162|PRDX4_HUMAN Peroxiredoxin-4 OS=Homo sapiens OX=9606 GN=PRDX4 PE=1 SV=1	1	18	18	15	13	15	14	16	11	13	13	13	15	14	16	11	13	13	10	12	11	13	9	11	11	66.1	66.1	59	30.54	271	271	0	207.07	1.114	0.6138	29.129	140	4	Leave out requantified	1.1477	1.1077	1.2291	1.254
1181	sp|Q13177|PAK2_HUMAN;sp|Q13153|PAK1_HUMAN;sp|O75914|PAK3_HUMAN	sp|Q13177|PAK2_HUMAN	11;4;3	11;4;3	11;4;3	sp|Q13177|PAK2_HUMAN Serine/threonine-protein kinase PAK 2 OS=Homo sapiens OX=9606 GN=PAK2 PE=1 SV=3	3	11	11	11	6	9	9	8	5	5	7	6	9	9	8	5	5	7	6	9	9	8	5	5	7	33.2	33.2	33.2	58.042	524	524;545;559	0	64.151	1.5923	0.67028	36.606	52	7	Leave out requantified	1.5871	1.714	2.1231	2.2748
1182	sp|Q13185|CBX3_HUMAN;sp|P83916|CBX1_HUMAN;sp|P45973|CBX5_HUMAN	sp|Q13185|CBX3_HUMAN	5;1;1	5;1;1	5;1;1	sp|Q13185|CBX3_HUMAN Chromobox protein homolog 3 OS=Homo sapiens OX=9606 GN=CBX3 PE=1 SV=4	3	5	5	5	5	5	5	5	5	5	5	5	5	5	5	5	5	5	5	5	5	5	5	5	5	36.6	36.6	36.6	20.811	183	183;185;191	0	61.291	1.9454	0.95284	29.32	47	15	Leave out requantified	2.4753	2.1317	2.1308	2.0866
1183	sp|Q13200|PSMD2_HUMAN	sp|Q13200|PSMD2_HUMAN	33	33	33	sp|Q13200|PSMD2_HUMAN 26S proteasome non-ATPase regulatory subunit 2 OS=Homo sapiens OX=9606 GN=PSMD2 PE=1 SV=3	1	33	33	33	21	20	17	22	22	26	22	21	20	17	22	22	26	22	21	20	17	22	22	26	22	45.4	45.4	45.4	100.2	908	908	0	131.96	2.7704	1.1061	18.396	166	45	Leave out requantified	3.0068	2.7952	3.2505	3.3126
1184	sp|Q13242|SRSF9_HUMAN	sp|Q13242|SRSF9_HUMAN	3	2	2	sp|Q13242|SRSF9_HUMAN Serine/arginine-rich splicing factor 9 OS=Homo sapiens OX=9606 GN=SRSF9 PE=1 SV=1	1	3	2	2	2	2	1	2	2	1	2	1	1	0	1	1	0	1	1	1	0	1	1	0	1	13.1	10	10	25.542	221	221	0.00059207	1.7354	0.23086	0.089016	74.532	5	5	Median	0.23086	0.18349		0.15293
1185	sp|Q13247|SRSF6_HUMAN;sp|Q08170|SRSF4_HUMAN	sp|Q13247|SRSF6_HUMAN	4;1	4;1	3;0	sp|Q13247|SRSF6_HUMAN Serine/arginine-rich splicing factor 6 OS=Homo sapiens OX=9606 GN=SRSF6 PE=1 SV=2	2	4	4	3	4	3	3	4	3	3	3	4	3	3	4	3	3	3	3	2	2	3	3	2	2	12.5	12.5	9.9	39.586	344	344;494	0	6.0713	3.9144	1.7987	6.6563	24	14	Leave out requantified	3.6984	3.2755	2.6627	3.4139
1186	sp|Q13263|TIF1B_HUMAN	sp|Q13263|TIF1B_HUMAN	27	27	27	sp|Q13263|TIF1B_HUMAN Transcription intermediary factor 1-beta OS=Homo sapiens OX=9606 GN=TRIM28 PE=1 SV=5	1	27	27	27	16	17	20	16	24	16	14	16	17	20	16	24	16	14	16	17	20	16	24	16	14	42.2	42.2	42.2	88.549	835	835	0	105.5	2.7454	1.0672	42.77	126	33	Leave out requantified	2.8803	2.7758	3.1823	2.9188
1187	sp|Q13283|G3BP1_HUMAN	sp|Q13283|G3BP1_HUMAN	6	6	6	sp|Q13283|G3BP1_HUMAN Ras GTPase-activating protein-binding protein 1 OS=Homo sapiens OX=9606 GN=G3BP1 PE=1 SV=1	1	6	6	6	4	3	2	3	5	2	4	4	3	2	3	5	2	4	4	3	2	3	5	2	4	23.4	23.4	23.4	52.164	466	466	0	31.485	2.6204	0.99685	21.184	22	7	Leave out requantified	1.8835	2.6172	3.5847	2.8415
1188	sp|Q13310|PABP4_HUMAN	sp|Q13310|PABP4_HUMAN	14	4	4	sp|Q13310|PABP4_HUMAN Polyadenylate-binding protein 4 OS=Homo sapiens OX=9606 GN=PABPC4 PE=1 SV=1	1	14	4	4	8	8	6	8	6	8	8	1	1	1	2	1	1	1	1	1	1	2	1	1	1	26.7	8.2	8.2	70.782	644	644	0	17.754	2.7569	1.3431	15.01	6	2	Leave out requantified	2.8526	2.3091	3.1961
1189	sp|Q13347|EIF3I_HUMAN	sp|Q13347|EIF3I_HUMAN	15	15	15	sp|Q13347|EIF3I_HUMAN Eukaryotic translation initiation factor 3 subunit I OS=Homo sapiens OX=9606 GN=EIF3I PE=1 SV=1	1	15	15	15	11	12	12	9	12	11	12	11	12	12	9	12	11	12	11	12	12	9	12	11	12	63.7	63.7	63.7	36.501	325	325	0	115.33	3.2055	1.2855	18.665	74	31	Leave out requantified	3.4063	3.4114	3.7827	3.308
1190	sp|Q13363|CTBP1_HUMAN	sp|Q13363|CTBP1_HUMAN	6	6	3	sp|Q13363|CTBP1_HUMAN C-terminal-binding protein 1 OS=Homo sapiens OX=9606 GN=CTBP1 PE=1 SV=2	1	6	6	3	3	4	4	3	4	3	2	3	4	4	3	4	3	2	1	2	2	1	2	1	0	17.3	17.3	11.8	47.535	440	440	0	8.4595	2.9254	1.1077	18.727	23	10	Leave out requantified	3.6258	3.4095	4.8826	4.722
1191	sp|Q13404|UB2V1_HUMAN	sp|Q13404|UB2V1_HUMAN	5	5	3	sp|Q13404|UB2V1_HUMAN Ubiquitin-conjugating enzyme E2 variant 1 OS=Homo sapiens OX=9606 GN=UBE2V1 PE=1 SV=2	1	5	5	3	1	2	3	1	3	3	1	1	2	3	1	3	3	1	1	1	2	1	3	2	1	33.3	33.3	21.8	16.495	147	147	0	6.1933	2.9553	1.1955	6.9161	13	6	Leave out requantified	1.0909	1.9439	3.4782	2.8555
1193	sp|Q13409|DC1I2_HUMAN	sp|Q13409|DC1I2_HUMAN	7	7	7	sp|Q13409|DC1I2_HUMAN Cytoplasmic dynein 1 intermediate chain 2 OS=Homo sapiens OX=9606 GN=DYNC1I2 PE=1 SV=3	1	7	7	7	2	2	4	6	4	3	3	2	2	4	6	4	3	3	2	2	4	6	4	3	3	17.9	17.9	17.9	71.456	638	638	0	32.905	2.3143	1.1014	121.7	24	17	Leave out requantified	2.6579	2.4201	2.0006	1.3833
1194	sp|Q13418|ILK_HUMAN	sp|Q13418|ILK_HUMAN	4	4	4	sp|Q13418|ILK_HUMAN Integrin-linked protein kinase OS=Homo sapiens OX=9606 GN=ILK PE=1 SV=2	1	4	4	4	1	3	2	1	2	3	2	1	3	2	1	2	3	2	1	3	2	1	2	3	2	9.3	9.3	9.3	51.419	452	452	0	8.8212	1.3105	0.53662	60.12	9	8	Median	1.3105	2.1715	1.6924	0.79744
1195	sp|Q13423|NNTM_HUMAN	sp|Q13423|NNTM_HUMAN	8	8	8	sp|Q13423|NNTM_HUMAN NAD(P) transhydrogenase, mitochondrial OS=Homo sapiens OX=9606 GN=NNT PE=1 SV=3	1	8	8	8	5	6	2	5	6	4	2	5	6	2	5	6	4	2	5	6	2	5	6	4	2	8.4	8.4	8.4	113.89	1086	1086	0	17.912	2.6678	1.0998	11.963	31	10	Leave out requantified	2.9064	2.5336	3.4764	3.0078
1196	sp|Q13425|SNTB2_HUMAN	sp|Q13425|SNTB2_HUMAN	2	2	2	sp|Q13425|SNTB2_HUMAN Beta-2-syntrophin OS=Homo sapiens OX=9606 GN=SNTB2 PE=1 SV=1	1	2	2	2	1	1	2	1	1	1	1	1	1	2	1	1	1	1	1	1	2	1	1	1	1	4.3	4.3	4.3	57.949	540	540	0.0023188	1.5202	3.9751	1.729	22.312	8	8	Median	3.9789	3.9808	2.9758	4.2211
1201	sp|Q13492|PICAL_HUMAN;sp|O60641|AP180_HUMAN	sp|Q13492|PICAL_HUMAN;sp|O60641|AP180_HUMAN	3;2	3;2	3;2	sp|Q13492|PICAL_HUMAN Phosphatidylinositol-binding clathrin assembly protein OS=Homo sapiens OX=9606 GN=PICALM PE=1 SV=2;sp|O60641|AP180_HUMAN Clathrin coat assembly protein AP180 OS=Homo sapiens OX=9606 GN=SNAP91 PE=1 SV=2	2	3	3	3	2	0	0	0	1	1	0	2	0	0	0	1	1	0	2	0	0	0	1	1	0	5.4	5.4	5.4	70.754	652	652;907	0	9.768	1.5928	0.76287	16.854	3	0	Median	1.5928
1202	sp|Q13501|SQSTM_HUMAN	sp|Q13501|SQSTM_HUMAN	4	4	4	sp|Q13501|SQSTM_HUMAN Sequestosome-1 OS=Homo sapiens OX=9606 GN=SQSTM1 PE=1 SV=1	1	4	4	4	0	3	2	1	1	0	1	0	3	2	1	1	0	1	0	3	2	1	1	0	1	15.9	15.9	15.9	47.687	440	440	0	6.182	1.0877	0.55661	27.831	8	3	Leave out requantified		1.4618	1.3889	0.95176
1203	sp|Q13509|TBB3_HUMAN	sp|Q13509|TBB3_HUMAN	18	5	3	sp|Q13509|TBB3_HUMAN Tubulin beta-3 chain OS=Homo sapiens OX=9606 GN=TUBB3 PE=1 SV=2	1	18	5	3	14	17	14	15	14	14	15	2	4	1	3	1	3	4	2	2	1	2	1	2	3	44.7	18.9	14.2	50.432	450	450	0	33.543	2.4521	0.98682	63.338	15	12	Median	2.9216	6.4632	2.4521	1.451
1205	sp|Q13526|PIN1_HUMAN	sp|Q13526|PIN1_HUMAN	3	3	3	sp|Q13526|PIN1_HUMAN Peptidyl-prolyl cis-trans isomerase NIMA-interacting 1 OS=Homo sapiens OX=9606 GN=PIN1 PE=1 SV=1	1	3	3	3	2	1	2	2	1	3	2	2	1	2	2	1	3	2	2	1	2	2	1	3	2	30.1	30.1	30.1	18.243	163	163	0	6.0836	2.8217	1.5361	19.796	14	5	Leave out requantified	3.1556	2.99	0.80125	3.4808
1206	sp|Q13557|KCC2D_HUMAN;sp|Q9UQM7|KCC2A_HUMAN;sp|Q13554|KCC2B_HUMAN	sp|Q13557|KCC2D_HUMAN;sp|Q9UQM7|KCC2A_HUMAN;sp|Q13554|KCC2B_HUMAN	2;1;1	2;1;1	2;1;1	sp|Q13557|KCC2D_HUMAN Calcium/calmodulin-dependent protein kinase type II subunit delta OS=Homo sapiens OX=9606 GN=CAMK2D PE=1 SV=3;sp|Q9UQM7|KCC2A_HUMAN Calcium/calmodulin-dependent protein kinase type II subunit alpha OS=Homo sapiens OX=9606 GN=CAMK2A PE	3	2	2	2	1	1	0	0	0	2	0	1	1	0	0	0	2	0	1	1	0	0	0	2	0	7.2	7.2	7.2	56.369	499	499;478;666	0	3.1477	0.93019	2.377	103.41	4	3	Linear	0.6079	5.0637
1207	sp|Q13561|DCTN2_HUMAN	sp|Q13561|DCTN2_HUMAN	9	9	9	sp|Q13561|DCTN2_HUMAN Dynactin subunit 2 OS=Homo sapiens OX=9606 GN=DCTN2 PE=1 SV=4	1	9	9	9	7	6	7	6	7	7	6	7	6	7	6	7	7	6	7	6	7	6	7	7	6	29.4	29.4	29.4	44.23	401	401	0	45.695	1.2403	0.51182	46.208	59	8	Leave out requantified	1.4353	1.3459	1.7271	1.4045
1208	sp|Q13564|ULA1_HUMAN	sp|Q13564|ULA1_HUMAN	4	4	4	sp|Q13564|ULA1_HUMAN NEDD8-activating enzyme E1 regulatory subunit OS=Homo sapiens OX=9606 GN=NAE1 PE=1 SV=1	1	4	4	4	3	2	2	2	2	3	2	3	2	2	2	2	3	2	3	2	2	2	2	3	2	12.4	12.4	12.4	60.246	534	534	0	30.616	2.0847	0.76514	14.721	16	8	Leave out requantified	2.5073	1.9671	2.4297	2.4343
1209	sp|Q13596|SNX1_HUMAN	sp|Q13596|SNX1_HUMAN	4	3	3	sp|Q13596|SNX1_HUMAN Sorting nexin-1 OS=Homo sapiens OX=9606 GN=SNX1 PE=1 SV=3	1	4	3	3	1	1	0	2	2	1	0	1	1	0	1	2	1	0	1	1	0	1	2	1	0	9.6	7.5	7.5	59.069	522	522	0	5.3262	1.7572	0.85162	48.571	4	3	Median	2.0627			1.497
1210	sp|Q13616|CUL1_HUMAN	sp|Q13616|CUL1_HUMAN	5	5	5	sp|Q13616|CUL1_HUMAN Cullin-1 OS=Homo sapiens OX=9606 GN=CUL1 PE=1 SV=2	1	5	5	5	4	4	0	4	4	3	1	4	4	0	4	4	3	1	4	4	0	4	4	3	1	8.9	8.9	8.9	89.677	776	776	0	21.838	3.1348	1.207	19.414	20	12	Leave out requantified	1.2695	1.3692		1.9498
1211	sp|Q13617|CUL2_HUMAN	sp|Q13617|CUL2_HUMAN	8	8	8	sp|Q13617|CUL2_HUMAN Cullin-2 OS=Homo sapiens OX=9606 GN=CUL2 PE=1 SV=2	1	8	8	8	4	4	3	2	6	4	2	4	4	3	2	6	4	2	4	4	3	2	6	4	2	13.6	13.6	13.6	86.982	745	745	0	15.625	1.1773	0.59634	104.87	23	20	Median	0.90834	1.3362	1.8966	1.4525
1214	sp|Q13620|CUL4B_HUMAN	sp|Q13620|CUL4B_HUMAN	11	11	4	sp|Q13620|CUL4B_HUMAN Cullin-4B OS=Homo sapiens OX=9606 GN=CUL4B PE=1 SV=4	1	11	11	4	6	6	5	4	4	9	4	6	6	5	4	4	9	4	3	3	1	1	3	3	1	11.9	11.9	4.6	103.98	913	913	0	33.763	3.0236	1.3752	28.2	35	10	Leave out requantified	3.3586	3.2633	3.0236	2.661
1215	sp|Q13630|FCL_HUMAN	sp|Q13630|FCL_HUMAN	2	2	2	sp|Q13630|FCL_HUMAN GDP-L-fucose synthase OS=Homo sapiens OX=9606 GN=GFUS PE=1 SV=1	1	2	2	2	2	1	2	0	1	1	1	2	1	2	0	1	1	1	2	1	2	0	1	1	1	5.6	5.6	5.6	35.892	321	321	0	2.4469	0.69205	0.29666	88.442	8	6	Median	0.77376	2.645	0.63122
1216	sp|Q13724|MOGS_HUMAN	sp|Q13724|MOGS_HUMAN	3	3	3	sp|Q13724|MOGS_HUMAN Mannosyl-oligosaccharide glucosidase OS=Homo sapiens OX=9606 GN=MOGS PE=1 SV=5	1	3	3	3	0	1	0	1	3	0	1	0	1	0	1	3	0	1	0	1	0	1	3	0	1	5.4	5.4	5.4	91.916	837	837	0	9.9055	1.1129	0.42472	73.51	6	5	Median		3.0349		1.4578
1217	sp|Q13740|CD166_HUMAN	sp|Q13740|CD166_HUMAN	8	8	8	sp|Q13740|CD166_HUMAN CD166 antigen OS=Homo sapiens OX=9606 GN=ALCAM PE=1 SV=2	1	8	8	8	5	5	5	6	4	4	7	5	5	5	6	4	4	7	5	5	5	6	4	4	7	23.5	23.5	23.5	65.102	583	583	0	51.322	1.5956	0.68991	23.711	37	3	Leave out requantified	1.6141	1.6034	1.9617	1.6972
1218	sp|Q13813|SPTN1_HUMAN	sp|Q13813|SPTN1_HUMAN	108	108	108	sp|Q13813|SPTN1_HUMAN Spectrin alpha chain, non-erythrocytic 1 OS=Homo sapiens OX=9606 GN=SPTAN1 PE=1 SV=3	1	108	108	108	66	71	71	69	72	66	67	66	71	71	69	72	66	67	66	71	71	69	72	66	67	54	54	54	284.54	2472	2472	0	323.31	2.1217	0.93927	35.964	508	134	Leave out requantified	2.1615	2.1068	2.5327	2.3011
1219	sp|Q13838|DX39B_HUMAN	sp|Q13838|DX39B_HUMAN	23	23	11	sp|Q13838|DX39B_HUMAN Spliceosome RNA helicase DDX39B OS=Homo sapiens OX=9606 GN=DDX39B PE=1 SV=1	1	23	23	11	13	13	16	18	14	19	18	13	13	16	18	14	19	18	7	6	7	9	8	10	9	62.4	62.4	35.3	48.991	428	428	0	164.68	2.5032	1.1488	38.296	129	17	Leave out requantified	2.8432	2.7681	2.8448	2.5535
1220	sp|Q13867|BLMH_HUMAN	sp|Q13867|BLMH_HUMAN	2	2	2	sp|Q13867|BLMH_HUMAN Bleomycin hydrolase OS=Homo sapiens OX=9606 GN=BLMH PE=1 SV=1	1	2	2	2	1	1	0	1	0	0	2	1	1	0	1	0	0	2	1	1	0	1	0	0	2	6.8	6.8	6.8	52.562	455	455	0	5.8803	1.1302	0.4507	19.431	5	0	Leave out requantified	1.2507	1.0963		1.0831
1222	sp|Q9BVA1|TBB2B_HUMAN;sp|Q13885|TBB2A_HUMAN	sp|Q9BVA1|TBB2B_HUMAN;sp|Q13885|TBB2A_HUMAN	21;21	2;2	1;1	sp|Q9BVA1|TBB2B_HUMAN Tubulin beta-2B chain OS=Homo sapiens OX=9606 GN=TUBB2B PE=1 SV=1;sp|Q13885|TBB2A_HUMAN Tubulin beta-2A chain OS=Homo sapiens OX=9606 GN=TUBB2A PE=1 SV=1	2	21	2	1	20	19	19	18	18	18	17	1	1	1	1	1	2	1	1	1	1	1	1	1	1	50.6	4.7	2	49.953	445	445;445	0	4.405	1.3463	0.51651	75.559	8	6	Median	0.93803	6.4608	1.2955	1.3991
1223	sp|Q13895|BYST_HUMAN	sp|Q13895|BYST_HUMAN	1	1	1	sp|Q13895|BYST_HUMAN Bystin OS=Homo sapiens OX=9606 GN=BYSL PE=1 SV=3	1	1	1	1	0	1	1	0	1	1	1	0	1	1	0	1	1	1	0	1	1	0	1	1	1	1.8	1.8	1.8	49.601	437	437	0.0055249	1.1717	1.8926	0.96049	9.6479	3	3	Median		2.43
1224	sp|Q13907|IDI1_HUMAN	sp|Q13907|IDI1_HUMAN	4	4	4	sp|Q13907|IDI1_HUMAN Isopentenyl-diphosphate Delta-isomerase 1 OS=Homo sapiens OX=9606 GN=IDI1 PE=1 SV=2	1	4	4	4	3	4	3	3	2	2	2	3	4	3	3	2	2	2	3	4	3	3	2	2	2	35.7	35.7	35.7	26.319	227	227	0	22.306	1.8562	0.81332	28.252	21	12	Leave out requantified	1.6989	1.803	2.5535	2.3243
1225	sp|Q14008|CKAP5_HUMAN	sp|Q14008|CKAP5_HUMAN	8	8	8	sp|Q14008|CKAP5_HUMAN Cytoskeleton-associated protein 5 OS=Homo sapiens OX=9606 GN=CKAP5 PE=1 SV=3	1	8	8	8	4	3	1	4	2	5	2	4	3	1	4	2	5	2	4	3	1	4	2	5	2	4.9	4.9	4.9	225.49	2032	2032	0	11.359	2.0048	0.98374	28.977	18	16	Median	1.6799	2.5085	1.9653	2.2875
1226	sp|Q14019|COTL1_HUMAN	sp|Q14019|COTL1_HUMAN	9	9	9	sp|Q14019|COTL1_HUMAN Coactosin-like protein OS=Homo sapiens OX=9606 GN=COTL1 PE=1 SV=3	1	9	9	9	6	6	8	7	8	9	9	6	6	8	7	8	9	9	6	6	8	7	8	9	9	66.9	66.9	66.9	15.945	142	142	0	61.936	1.8921	0.81537	24.342	60	14	Leave out requantified	2.1379	1.8853	2.0818	2.115
1227	sp|Q14103|HNRPD_HUMAN	sp|Q14103|HNRPD_HUMAN	20	20	18	sp|Q14103|HNRPD_HUMAN Heterogeneous nuclear ribonucleoprotein D0 OS=Homo sapiens OX=9606 GN=HNRNPD PE=1 SV=1	1	20	20	18	16	15	14	14	17	17	15	16	15	14	14	17	17	15	15	14	13	13	15	16	14	42.5	42.5	39.7	38.434	355	355	0	161.18	2.497	1.1942	48.895	135	25	Leave out requantified	2.7433	2.6901	3.1589	2.6516
1228	sp|Q14108|SCRB2_HUMAN	sp|Q14108|SCRB2_HUMAN	4	4	4	sp|Q14108|SCRB2_HUMAN Lysosome membrane protein 2 OS=Homo sapiens OX=9606 GN=SCARB2 PE=1 SV=2	1	4	4	4	3	2	2	1	1	3	2	3	2	2	1	1	3	2	3	2	2	1	1	3	2	12.1	12.1	12.1	54.29	478	478	0	12.366	1.0893	0.49947	53.711	10	1	Leave out requantified	1.683	1.0398	1.0002	1.1572
1229	sp|Q14152|EIF3A_HUMAN	sp|Q14152|EIF3A_HUMAN	44	44	44	sp|Q14152|EIF3A_HUMAN Eukaryotic translation initiation factor 3 subunit A OS=Homo sapiens OX=9606 GN=EIF3A PE=1 SV=1	1	44	44	44	28	23	19	21	24	23	21	28	23	19	21	24	23	21	28	23	19	21	24	23	21	37.6	37.6	37.6	166.57	1382	1382	0	155.53	3.1859	1.5665	34.66	178	69	Leave out requantified	3.2504	3.7337	5.0572	3.5584
1230	sp|Q14157|UBP2L_HUMAN	sp|Q14157|UBP2L_HUMAN	1	1	1	sp|Q14157|UBP2L_HUMAN Ubiquitin-associated protein 2-like OS=Homo sapiens OX=9606 GN=UBAP2L PE=1 SV=2	1	1	1	1	1	0	1	1	0	0	0	1	0	1	1	0	0	0	1	0	1	1	0	0	0	0.8	0.8	0.8	114.53	1087	1087	0.0011744	1.6327	1.9233	0.72781	64.305	3	2	Median	1.5494		1.9233	4.8308
1231	sp|Q14166|TTL12_HUMAN	sp|Q14166|TTL12_HUMAN	3	3	3	sp|Q14166|TTL12_HUMAN Tubulin--tyrosine ligase-like protein 12 OS=Homo sapiens OX=9606 GN=TTLL12 PE=1 SV=2	1	3	3	3	0	1	1	2	2	0	1	0	1	1	2	2	0	1	0	1	1	2	2	0	1	8.7	8.7	8.7	74.403	644	644	0	14.97	3.8511	1.5108	76.875	6	5	Linear		0.92661	3.7111	1.5623
1232	sp|Q14203|DCTN1_HUMAN	sp|Q14203|DCTN1_HUMAN	5	5	5	sp|Q14203|DCTN1_HUMAN Dynactin subunit 1 OS=Homo sapiens OX=9606 GN=DCTN1 PE=1 SV=3	1	5	5	5	2	2	2	1	2	3	2	2	2	2	1	2	3	2	2	2	2	1	2	3	2	4.9	4.9	4.9	141.69	1278	1278	0	15.898	2.8698	1.4209	14.42	14	9	Leave out requantified	1.9659	1.5993	1.5172	2.6148
1233	sp|Q14204|DYHC1_HUMAN	sp|Q14204|DYHC1_HUMAN	90	90	90	sp|Q14204|DYHC1_HUMAN Cytoplasmic dynein 1 heavy chain 1 OS=Homo sapiens OX=9606 GN=DYNC1H1 PE=1 SV=5	1	90	90	90	38	47	42	42	34	50	45	38	47	42	42	34	50	45	38	47	42	42	34	50	45	24.8	24.8	24.8	532.4	4646	4646	0	323.31	5.2304	2.1496	34.413	266	174	Leave out requantified	5.831	5.3714	7.6701	6.6448
1234	sp|Q14232|EI2BA_HUMAN	sp|Q14232|EI2BA_HUMAN	6	6	6	sp|Q14232|EI2BA_HUMAN Translation initiation factor eIF-2B subunit alpha OS=Homo sapiens OX=9606 GN=EIF2B1 PE=1 SV=1	1	6	6	6	3	6	2	2	2	2	4	3	6	2	2	2	2	4	3	6	2	2	2	2	4	21.6	21.6	21.6	33.712	305	305	0	8.9485	2.6402	1.1696	15.301	20	10	Leave out requantified	3.6093	2.3087	0.88863	0.50399
1235	sp|Q14240|IF4A2_HUMAN	sp|Q14240|IF4A2_HUMAN	16	3	3	sp|Q14240|IF4A2_HUMAN Eukaryotic initiation factor 4A-II OS=Homo sapiens OX=9606 GN=EIF4A2 PE=1 SV=2	1	16	3	3	10	13	12	12	13	10	10	0	2	1	1	2	1	1	0	2	1	1	2	1	1	40.5	12	12	46.402	407	407	0	5.5763	2.08	1.1836	74.158	8	3	Median		1.2584	4.0625	0.78046
1236	sp|Q14247|SRC8_HUMAN	sp|Q14247|SRC8_HUMAN	7	7	7	sp|Q14247|SRC8_HUMAN Src substrate cortactin OS=Homo sapiens OX=9606 GN=CTTN PE=1 SV=2	1	7	7	7	4	6	3	4	4	5	3	4	6	3	4	4	5	3	4	6	3	4	4	5	3	13.8	13.8	13.8	61.585	550	550	0	20.043	2.3996	1.137	10.824	26	12	Leave out requantified	2.8524	2.4186	2.8657	2.4418
1237	sp|Q14254|FLOT2_HUMAN	sp|Q14254|FLOT2_HUMAN	1	1	1	sp|Q14254|FLOT2_HUMAN Flotillin-2 OS=Homo sapiens OX=9606 GN=FLOT2 PE=1 SV=2	1	1	1	1	1	0	1	1	0	1	1	1	0	1	1	0	1	1	1	0	1	1	0	1	1	2.8	2.8	2.8	47.064	428	428	0	3.3278	4.4402	1.6936	15.235	5	0	Median	5.9418		4.6993	4.4402
1238	sp|Q14258|TRI25_HUMAN	sp|Q14258|TRI25_HUMAN	6	6	6	sp|Q14258|TRI25_HUMAN E3 ubiquitin/ISG15 ligase TRIM25 OS=Homo sapiens OX=9606 GN=TRIM25 PE=1 SV=2	1	6	6	6	2	3	0	0	2	2	3	2	3	0	0	2	2	3	2	3	0	0	2	2	3	11.4	11.4	11.4	70.973	630	630	0	8.9577	1.4516	0.73975	86.57	12	9	Median	0.68939	1.9444
1239	sp|Q14315|FLNC_HUMAN	sp|Q14315|FLNC_HUMAN	105	90	90	sp|Q14315|FLNC_HUMAN Filamin-C OS=Homo sapiens OX=9606 GN=FLNC PE=1 SV=3	1	105	90	90	69	74	70	69	76	74	69	58	61	57	58	63	62	59	58	61	57	58	63	62	59	51.6	45.8	45.8	291.02	2725	2725	0	323.31	1.5509	0.6628	33.384	439	102	Leave out requantified	1.5558	1.5456	1.6403	1.6869
1240	sp|Q14344|GNA13_HUMAN	sp|Q14344|GNA13_HUMAN	2	2	2	sp|Q14344|GNA13_HUMAN Guanine nucleotide-binding protein subunit alpha-13 OS=Homo sapiens OX=9606 GN=GNA13 PE=1 SV=2	1	2	2	2	1	0	0	2	0	2	0	1	0	0	2	0	2	0	1	0	0	2	0	2	0	7.7	7.7	7.7	44.049	377	377	0	5.6034	0.7968	0.34897	136.05	5	5	Median	0.7968			0.37573
1241	sp|Q14376|GALE_HUMAN	sp|Q14376|GALE_HUMAN	3	3	3	sp|Q14376|GALE_HUMAN UDP-glucose 4-epimerase OS=Homo sapiens OX=9606 GN=GALE PE=1 SV=2	1	3	3	3	2	1	2	2	2	0	2	2	1	2	2	2	0	2	2	1	2	2	2	0	2	10.1	10.1	10.1	38.281	348	348	0	6.8223	2.5862	0.98657	105.41	11	11	Median	1.282	0.57243	1.4145	3.2239
1242	sp|Q14444|CAPR1_HUMAN	sp|Q14444|CAPR1_HUMAN	4	4	4	sp|Q14444|CAPR1_HUMAN Caprin-1 OS=Homo sapiens OX=9606 GN=CAPRIN1 PE=1 SV=2	1	4	4	4	2	3	4	3	3	2	2	2	3	4	3	3	2	2	2	3	4	3	3	2	2	9	9	9	78.365	709	709	0	15.364	2.1574	0.87284	41.364	19	10	Leave out requantified	0.55435	1.4901	2.0849	2.1722
1243	sp|Q14498|RBM39_HUMAN;sp|Q86U06|RBM23_HUMAN	sp|Q14498|RBM39_HUMAN	6;1	6;1	6;1	sp|Q14498|RBM39_HUMAN RNA-binding protein 39 OS=Homo sapiens OX=9606 GN=RBM39 PE=1 SV=2	2	6	6	6	3	2	4	3	2	2	0	3	2	4	3	2	2	0	3	2	4	3	2	2	0	14.3	14.3	14.3	59.379	530	530;439	0	14.447	0.90863	0.37256	92.926	14	10	Median	1.0208	0.38883	1.0341	0.71611
1244	sp|Q14558|KPRA_HUMAN	sp|Q14558|KPRA_HUMAN	3	3	3	sp|Q14558|KPRA_HUMAN Phosphoribosyl pyrophosphate synthase-associated protein 1 OS=Homo sapiens OX=9606 GN=PRPSAP1 PE=1 SV=2	1	3	3	3	2	1	2	0	3	2	0	2	1	2	0	3	2	0	2	1	2	0	3	2	0	11	11	11	39.393	356	356	0	7.8799	1.5776	0.74585	99.383	9	7	Median	0.52439	0.86208	1.4672
1245	sp|Q14566|MCM6_HUMAN	sp|Q14566|MCM6_HUMAN	15	15	15	sp|Q14566|MCM6_HUMAN DNA replication licensing factor MCM6 OS=Homo sapiens OX=9606 GN=MCM6 PE=1 SV=1	1	15	15	15	3	6	6	6	6	10	5	3	6	6	6	6	10	5	3	6	6	6	6	10	5	22.5	22.5	22.5	92.888	821	821	0	38.55	2.8817	1.5023	27.341	37	22	Leave out requantified	3.6722	2.0523	3.2726	1.7111
1247	sp|Q14683|SMC1A_HUMAN	sp|Q14683|SMC1A_HUMAN	5	5	5	sp|Q14683|SMC1A_HUMAN Structural maintenance of chromosomes protein 1A OS=Homo sapiens OX=9606 GN=SMC1A PE=1 SV=2	1	5	5	5	1	1	2	0	0	1	1	1	1	2	0	0	1	1	1	1	2	0	0	1	1	3.6	3.6	3.6	143.23	1233	1233	0	2.9104	1.0171	0.43506	145	4	3	Median	2.0927		0.74584
1249	sp|Q14697|GANAB_HUMAN	sp|Q14697|GANAB_HUMAN	42	42	42	sp|Q14697|GANAB_HUMAN Neutral alpha-glucosidase AB OS=Homo sapiens OX=9606 GN=GANAB PE=1 SV=3	1	42	42	42	33	38	30	32	35	35	35	33	38	30	32	35	35	35	33	38	30	32	35	35	35	54.1	54.1	54.1	106.87	944	944	0	323.31	2.1381	0.94037	24.257	306	67	Leave out requantified	2.374	2.314	2.3428	2.2434
1250	sp|Q14738|2A5D_HUMAN;sp|Q13362|2A5G_HUMAN	sp|Q14738|2A5D_HUMAN;sp|Q13362|2A5G_HUMAN	8;4	8;4	8;4	sp|Q14738|2A5D_HUMAN Serine/threonine-protein phosphatase 2A 56 kDa regulatory subunit delta isoform OS=Homo sapiens OX=9606 GN=PPP2R5D PE=1 SV=1;sp|Q13362|2A5G_HUMAN Serine/threonine-protein phosphatase 2A 56 kDa regulatory subunit gamma isoform OS=Homo s	2	8	8	8	3	4	3	4	2	3	2	3	4	3	4	2	3	2	3	4	3	4	2	3	2	14.1	14.1	14.1	69.991	602	602;524	0	14.996	3.3282	1.3349	25.83	21	15	Leave out requantified	2.8031	2.6071	3.326	2.503
1251	sp|Q14764|MVP_HUMAN	sp|Q14764|MVP_HUMAN	37	37	37	sp|Q14764|MVP_HUMAN Major vault protein OS=Homo sapiens OX=9606 GN=MVP PE=1 SV=4	1	37	37	37	20	22	25	21	22	23	22	20	22	25	21	22	23	22	20	22	25	21	22	23	22	53.3	53.3	53.3	99.326	893	893	0	190.16	1.1627	0.52079	33.394	171	23	Leave out requantified	1.1434	1.3264	1.2969	1.3142
1254	sp|Q14839|CHD4_HUMAN;sp|Q8TDI0|CHD5_HUMAN;sp|Q12873|CHD3_HUMAN	sp|Q14839|CHD4_HUMAN	7;2;1	7;2;1	7;2;1	sp|Q14839|CHD4_HUMAN Chromodomain-helicase-DNA-binding protein 4 OS=Homo sapiens OX=9606 GN=CHD4 PE=1 SV=2	3	7	7	7	2	3	4	2	0	0	1	2	3	4	2	0	0	1	2	3	4	2	0	0	1	6.4	6.4	6.4	218	1912	1912;1954;2000	0	18.997	0.7952	0.33152	131.4	7	7	Median	4.6539	1.6665	0.35455	0.31317
1255	sp|Q14847|LASP1_HUMAN	sp|Q14847|LASP1_HUMAN	11	11	11	sp|Q14847|LASP1_HUMAN LIM and SH3 domain protein 1 OS=Homo sapiens OX=9606 GN=LASP1 PE=1 SV=2	1	11	11	11	10	8	6	9	8	9	7	10	8	6	9	8	9	7	10	8	6	9	8	9	7	39.1	39.1	39.1	29.717	261	261	0	55.821	2.2463	1.043	28.5	62	15	Leave out requantified	2.5173	2.3808	2.5936	2.4558
1256	sp|Q14914|PTGR1_HUMAN	sp|Q14914|PTGR1_HUMAN	3	3	3	sp|Q14914|PTGR1_HUMAN Prostaglandin reductase 1 OS=Homo sapiens OX=9606 GN=PTGR1 PE=1 SV=2	1	3	3	3	0	0	0	1	0	3	1	0	0	0	1	0	3	1	0	0	0	1	0	3	1	13.1	13.1	13.1	35.869	329	329	0	4.6094	1.9882	0.99448	16.096	5	3	Median				2.4414
1257	sp|Q14974|IMB1_HUMAN	sp|Q14974|IMB1_HUMAN	35	35	35	sp|Q14974|IMB1_HUMAN Importin subunit beta-1 OS=Homo sapiens OX=9606 GN=KPNB1 PE=1 SV=2	1	35	35	35	22	26	22	24	22	26	26	22	26	22	24	22	26	26	22	26	22	24	22	26	26	47.5	47.5	47.5	97.169	876	876	0	323.31	2.1895	0.91007	28.966	221	46	Leave out requantified	2.3432	2.2028	2.4661	2.3002
1258	sp|Q14980|NUMA1_HUMAN	sp|Q14980|NUMA1_HUMAN	45	45	45	sp|Q14980|NUMA1_HUMAN Nuclear mitotic apparatus protein 1 OS=Homo sapiens OX=9606 GN=NUMA1 PE=1 SV=2	1	45	45	45	22	28	27	21	24	25	20	22	28	27	21	24	25	20	22	28	27	21	24	25	20	28.8	28.8	28.8	238.26	2115	2115	0	188.65	2.0656	0.89043	33.524	159	60	Leave out requantified	2.2258	2.092	2.2996	2.176
1259	sp|Q14C86|GAPD1_HUMAN	sp|Q14C86|GAPD1_HUMAN	3	3	3	sp|Q14C86|GAPD1_HUMAN GTPase-activating protein and VPS9 domain-containing protein 1 OS=Homo sapiens OX=9606 GN=GAPVD1 PE=1 SV=2	1	3	3	3	2	1	1	2	1	3	2	2	1	1	2	1	3	2	2	1	1	2	1	3	2	2.3	2.3	2.3	164.98	1478	1478	0	2.9677	1.0331	0.40737	190.32	9	9	Median	0.26901		1.6774	0.20061
1260	sp|Q14CX7|NAA25_HUMAN	sp|Q14CX7|NAA25_HUMAN	2	2	2	sp|Q14CX7|NAA25_HUMAN N-alpha-acetyltransferase 25, NatB auxiliary subunit OS=Homo sapiens OX=9606 GN=NAA25 PE=1 SV=1	1	2	2	2	1	1	0	2	0	1	1	1	1	0	2	0	1	1	1	1	0	2	0	1	1	2.4	2.4	2.4	112.29	972	972	0	6.3314	2.7713	1.4659	61.036	6	2	Median	4.0902	3.3482		1.8083
1261	sp|Q15003|CND2_HUMAN	sp|Q15003|CND2_HUMAN	5	5	5	sp|Q15003|CND2_HUMAN Condensin complex subunit 2 OS=Homo sapiens OX=9606 GN=NCAPH PE=1 SV=3	1	5	5	5	3	1	2	0	0	2	2	3	1	2	0	0	2	2	3	1	2	0	0	2	2	8	8	8	82.562	741	741	0	5.9777	1.0332	0.52258	70.525	9	8	Median	0.92054	1.4979	0.58404
1262	sp|Q15005|SPCS2_HUMAN	sp|Q15005|SPCS2_HUMAN	4	4	4	sp|Q15005|SPCS2_HUMAN Signal peptidase complex subunit 2 OS=Homo sapiens OX=9606 GN=SPCS2 PE=1 SV=3	1	4	4	4	1	1	1	1	3	2	2	1	1	1	1	3	2	2	1	1	1	1	3	2	2	15.9	15.9	15.9	25.003	226	226	0	3.951	2.6266	1.2465	4.4059	11	6	Leave out requantified	2.9422	3.9261	2.8809	2.3145
1263	sp|Q15006|EMC2_HUMAN	sp|Q15006|EMC2_HUMAN	2	2	2	sp|Q15006|EMC2_HUMAN ER membrane protein complex subunit 2 OS=Homo sapiens OX=9606 GN=EMC2 PE=1 SV=1	1	2	2	2	1	0	2	0	1	1	0	1	0	2	0	1	1	0	1	0	2	0	1	1	0	10.4	10.4	10.4	34.833	297	297	0	4.4264	1.9921	0.86345	13.333	5	4	Median	1.8784		2.3648
1264	sp|Q15008|PSMD6_HUMAN	sp|Q15008|PSMD6_HUMAN	18	18	18	sp|Q15008|PSMD6_HUMAN 26S proteasome non-ATPase regulatory subunit 6 OS=Homo sapiens OX=9606 GN=PSMD6 PE=1 SV=1	1	18	18	18	11	11	13	11	9	10	12	11	11	13	11	9	10	12	11	11	13	11	9	10	12	51.4	51.4	51.4	45.531	389	389	0	55.742	2.4853	1.0005	31.057	77	25	Leave out requantified	2.5387	2.8222	3.0682	2.6731
1265	sp|Q15019|SEPT2_HUMAN	sp|Q15019|SEPT2_HUMAN	12	12	12	sp|Q15019|SEPT2_HUMAN Septin-2 OS=Homo sapiens OX=9606 GN=SEPTIN2 PE=1 SV=1	1	12	12	12	11	11	10	9	11	10	9	11	11	10	9	11	10	9	11	11	10	9	11	10	9	47.4	47.4	47.4	41.487	361	361	0	155.77	2.8727	1.1636	30.912	89	14	Leave out requantified	2.8586	3.0487	3.1562	3.3938
1266	sp|Q15020|SART3_HUMAN	sp|Q15020|SART3_HUMAN	3	3	3	sp|Q15020|SART3_HUMAN Squamous cell carcinoma antigen recognized by T-cells 3 OS=Homo sapiens OX=9606 GN=SART3 PE=1 SV=1	1	3	3	3	2	1	0	1	2	1	1	2	1	0	1	2	1	1	2	1	0	1	2	1	1	3.8	3.8	3.8	109.93	963	963	0	1.9419	2.7796	1.0114	70.005	7	6	Median	2.1656	3.0503		3.0071
1267	sp|Q15021|CND1_HUMAN	sp|Q15021|CND1_HUMAN	10	10	10	sp|Q15021|CND1_HUMAN Condensin complex subunit 1 OS=Homo sapiens OX=9606 GN=NCAPD2 PE=1 SV=3	1	10	10	10	5	5	5	3	5	7	4	5	5	5	3	5	7	4	5	5	5	3	5	7	4	8.9	8.9	8.9	157.18	1401	1401	0	18.507	6.8233	2.9393	84.299	29	28	Linear	2.7557	1.5876	2.5947	0.57566
1268	sp|Q15029|U5S1_HUMAN	sp|Q15029|U5S1_HUMAN	8	7	7	sp|Q15029|U5S1_HUMAN 116 kDa U5 small nuclear ribonucleoprotein component OS=Homo sapiens OX=9606 GN=EFTUD2 PE=1 SV=1	1	8	7	7	4	5	3	5	5	4	7	3	4	2	4	4	3	6	3	4	2	4	4	3	6	9.9	8.8	8.8	109.43	972	972	0	23.058	3.4049	1.5252	22.495	23	19	Leave out requantified	2.6148	2.6464	3.1539	4.839
1269	sp|Q15041|AR6P1_HUMAN	sp|Q15041|AR6P1_HUMAN	1	1	1	sp|Q15041|AR6P1_HUMAN ADP-ribosylation factor-like protein 6-interacting protein 1 OS=Homo sapiens OX=9606 GN=ARL6IP1 PE=1 SV=2	1	1	1	1	1	1	0	0	1	1	0	1	1	0	0	1	1	0	1	1	0	0	1	1	0	3.9	3.9	3.9	23.362	203	203	0.0039932	1.3929	1.8265	0.75245	6.5055	4	0	Median	1.7794	1.8749
1270	sp|Q15046|SYK_HUMAN	sp|Q15046|SYK_HUMAN	6	6	6	sp|Q15046|SYK_HUMAN Lysine--tRNA ligase OS=Homo sapiens OX=9606 GN=KARS1 PE=1 SV=3	1	6	6	6	2	2	1	3	2	2	3	2	2	1	3	2	2	3	2	2	1	3	2	2	3	10.2	10.2	10.2	68.047	597	597	0	16.035	3.8687	1.537	15.343	15	9	Leave out requantified	2.1399	1.4344	3.9784	2.9711
1271	sp|Q15056|IF4H_HUMAN	sp|Q15056|IF4H_HUMAN	10	10	10	sp|Q15056|IF4H_HUMAN Eukaryotic translation initiation factor 4H OS=Homo sapiens OX=9606 GN=EIF4H PE=1 SV=5	1	10	10	10	9	4	6	6	4	4	3	9	4	6	6	4	4	3	9	4	6	6	4	4	3	41.5	41.5	41.5	27.385	248	248	0	58.641	2.3231	1.3356	37.773	35	17	Leave out requantified	2.1448	1.8801	3.2826	2.2693
1272	sp|Q15075|EEA1_HUMAN	sp|Q15075|EEA1_HUMAN	14	14	14	sp|Q15075|EEA1_HUMAN Early endosome antigen 1 OS=Homo sapiens OX=9606 GN=EEA1 PE=1 SV=2	1	14	14	14	3	5	2	5	4	5	3	3	5	2	5	4	5	3	3	5	2	5	4	5	3	11.7	11.7	11.7	162.46	1411	1411	0	27.209	2.1169	0.99724	28.706	24	18	Leave out requantified	2.0993	1.3028	1.9941	1.0582
1273	sp|Q15084|PDIA6_HUMAN	sp|Q15084|PDIA6_HUMAN	14	14	14	sp|Q15084|PDIA6_HUMAN Protein disulfide-isomerase A6 OS=Homo sapiens OX=9606 GN=PDIA6 PE=1 SV=1	1	14	14	14	9	9	9	9	11	7	9	9	9	9	9	11	7	9	9	9	9	9	11	7	9	45.5	45.5	45.5	48.121	440	440	0	128.98	1.7423	0.75293	39.12	74	23	Leave out requantified	2.2262	2.0874	2.3401	2.1864
1274	sp|Q15102|PA1B3_HUMAN	sp|Q15102|PA1B3_HUMAN	7	7	7	sp|Q15102|PA1B3_HUMAN Platelet-activating factor acetylhydrolase IB subunit alpha1 OS=Homo sapiens OX=9606 GN=PAFAH1B3 PE=1 SV=1	1	7	7	7	4	4	6	5	5	6	3	4	4	6	5	5	6	3	4	4	6	5	5	6	3	35.9	35.9	35.9	25.734	231	231	0	17.057	3.2668	1.4255	35.599	28	7	Leave out requantified	3.0682	3.9267	3.9584	3.2668
1275	sp|Q15121|PEA15_HUMAN	sp|Q15121|PEA15_HUMAN	2	2	2	sp|Q15121|PEA15_HUMAN Astrocytic phosphoprotein PEA-15 OS=Homo sapiens OX=9606 GN=PEA15 PE=1 SV=2	1	2	2	2	1	0	1	2	1	1	0	1	0	1	2	1	1	0	1	0	1	2	1	1	0	16.9	16.9	16.9	15.04	130	130	0	5.8224	1.044	0.69332	82.072	7	5	Median	0.45377		1.7061	0.8389
1276	sp|Q15125|EBP_HUMAN	sp|Q15125|EBP_HUMAN	3	3	3	sp|Q15125|EBP_HUMAN 3-beta-hydroxysteroid-Delta(8),Delta(7)-isomerase OS=Homo sapiens OX=9606 GN=EBP PE=1 SV=3	1	3	3	3	1	1	1	1	0	2	1	1	1	1	1	0	2	1	1	1	1	1	0	2	1	16.5	16.5	16.5	26.352	230	230	0	3.6031	1.9588	0.74737	38.85	7	0	Leave out requantified	2.2046	1.7809	2.0283	1.9862
1277	sp|Q15149|PLEC_HUMAN;sp|P58107|EPIPL_HUMAN	sp|Q15149|PLEC_HUMAN	160;6	160;6	160;6	sp|Q15149|PLEC_HUMAN Plectin OS=Homo sapiens OX=9606 GN=PLEC PE=1 SV=3	2	160	160	160	97	100	85	87	100	96	98	97	100	85	87	100	96	98	97	100	85	87	100	96	98	41.2	41.2	41.2	531.78	4684	4684;5088	0	323.31	3.0005	1.3986	36.47	667	276	Leave out requantified	3.0086	3.1781	3.4817	3.2216
1278	sp|Q15181|IPYR_HUMAN	sp|Q15181|IPYR_HUMAN	11	11	11	sp|Q15181|IPYR_HUMAN Inorganic pyrophosphatase OS=Homo sapiens OX=9606 GN=PPA1 PE=1 SV=2	1	11	11	11	8	7	6	6	7	9	8	8	7	6	6	7	9	8	8	7	6	6	7	9	8	48.8	48.8	48.8	32.66	289	289	0	125.5	1.8835	0.75541	33.355	61	17	Leave out requantified	2.1238	2.0686	2.1466	2.1603
1279	sp|Q15185|TEBP_HUMAN	sp|Q15185|TEBP_HUMAN	5	5	5	sp|Q15185|TEBP_HUMAN Prostaglandin E synthase 3 OS=Homo sapiens OX=9606 GN=PTGES3 PE=1 SV=1	1	5	5	5	4	3	4	3	4	3	2	4	3	4	3	4	3	2	4	3	4	3	4	3	2	29.4	29.4	29.4	18.697	160	160	0	31.078	1.7152	0.7783	22.75	30	5	Leave out requantified	2.1529	1.5073	2.6614	1.9346
1280	sp|Q15257|PTPA_HUMAN	sp|Q15257|PTPA_HUMAN	6	6	6	sp|Q15257|PTPA_HUMAN Serine/threonine-protein phosphatase 2A activator OS=Homo sapiens OX=9606 GN=PTPA PE=1 SV=3	1	6	6	6	3	1	2	2	1	2	1	3	1	2	2	1	2	1	3	1	2	2	1	2	1	26.5	26.5	26.5	40.667	358	358	0	12.08	1.3133	0.53775	87.147	9	6	Median	1.2323	1.8809	1.3133	1.603
1281	sp|Q15287|RNPS1_HUMAN	sp|Q15287|RNPS1_HUMAN	1	1	1	sp|Q15287|RNPS1_HUMAN RNA-binding protein with serine-rich domain 1 OS=Homo sapiens OX=9606 GN=RNPS1 PE=1 SV=1	1	1	1	1	1	1	1	1	1	1	1	1	1	1	1	1	1	1	1	1	1	1	1	1	1	4.9	4.9	4.9	34.208	305	305	0	3.4092	1.2919	0.58425	10.614	5	5	Median	1.2919	1.373	1.5717
1282	sp|Q15293|RCN1_HUMAN	sp|Q15293|RCN1_HUMAN	9	9	9	sp|Q15293|RCN1_HUMAN Reticulocalbin-1 OS=Homo sapiens OX=9606 GN=RCN1 PE=1 SV=1	1	9	9	9	6	6	5	4	7	6	5	6	6	5	4	7	6	5	6	6	5	4	7	6	5	36	36	36	38.89	331	331	0	65.921	3.2175	1.4047	31.149	38	8	Leave out requantified	3.0442	3.2237	3.9077	3.2063
1283	sp|Q15363|TMED2_HUMAN	sp|Q15363|TMED2_HUMAN	4	4	4	sp|Q15363|TMED2_HUMAN Transmembrane emp24 domain-containing protein 2 OS=Homo sapiens OX=9606 GN=TMED2 PE=1 SV=1	1	4	4	4	2	2	3	4	4	4	3	2	2	3	4	4	4	3	2	2	3	4	4	4	3	21.4	21.4	21.4	22.761	201	201	0	13.758	2.0782	0.85566	12.909	22	1	Leave out requantified	2.1988	2.1567	2.521	2.2762
1284	sp|Q15365|PCBP1_HUMAN	sp|Q15365|PCBP1_HUMAN	13	13	9	sp|Q15365|PCBP1_HUMAN Poly(rC)-binding protein 1 OS=Homo sapiens OX=9606 GN=PCBP1 PE=1 SV=2	1	13	13	9	10	10	10	9	10	10	10	10	10	10	9	10	10	10	7	7	7	6	7	8	7	60.4	60.4	47.2	37.497	356	356	0	216.32	2.22	0.90417	49.54	101	22	Leave out requantified	2.3554	2.1758	2.5874	2.3374
1285	sp|Q15366|PCBP2_HUMAN	sp|Q15366|PCBP2_HUMAN	12	8	7	sp|Q15366|PCBP2_HUMAN Poly(rC)-binding protein 2 OS=Homo sapiens OX=9606 GN=PCBP2 PE=1 SV=1	1	12	8	7	9	8	10	9	9	7	10	6	5	7	6	6	5	7	5	4	6	5	5	4	6	42.5	29.6	25.8	38.58	365	365	0	88.451	1.8584	0.91561	26.25	55	16	Leave out requantified	2.2801	2.1573	1.9983	1.8881
1286	sp|Q15369|ELOC_HUMAN	sp|Q15369|ELOC_HUMAN	4	4	4	sp|Q15369|ELOC_HUMAN Elongin-C OS=Homo sapiens OX=9606 GN=ELOC PE=1 SV=1	1	4	4	4	3	1	2	1	2	4	1	3	1	2	1	2	4	1	3	1	2	1	2	4	1	50	50	50	12.473	112	112	0	38.983	1.6836	0.6874	33.923	12	3	Leave out requantified	1.5194	2.5633	1.4011	1.1075
1287	sp|Q15370|ELOB_HUMAN	sp|Q15370|ELOB_HUMAN	4	4	4	sp|Q15370|ELOB_HUMAN Elongin-B OS=Homo sapiens OX=9606 GN=ELOB PE=1 SV=1	1	4	4	4	0	2	2	3	2	1	0	0	2	2	3	2	1	0	0	2	2	3	2	1	0	42.4	42.4	42.4	13.133	118	118	0	7.7847	2.0165	0.88323	5.1686	9	1	Leave out requantified		1.6266	1.8776	1.7484
1288	sp|Q15382|RHEB_HUMAN	sp|Q15382|RHEB_HUMAN	5	5	5	sp|Q15382|RHEB_HUMAN GTP-binding protein Rheb OS=Homo sapiens OX=9606 GN=RHEB PE=1 SV=1	1	5	5	5	0	2	1	1	2	2	1	0	2	1	1	2	2	1	0	2	1	1	2	2	1	26.6	26.6	26.6	20.497	184	184	0	18.545	3.0322	1.227	111.28	9	7	Median		1.3344	4.0694	3.0322
1290	sp|Q15392|DHC24_HUMAN	sp|Q15392|DHC24_HUMAN	3	3	3	sp|Q15392|DHC24_HUMAN Delta(24)-sterol reductase OS=Homo sapiens OX=9606 GN=DHCR24 PE=1 SV=2	1	3	3	3	0	0	0	2	1	1	1	0	0	0	2	1	1	1	0	0	0	2	1	1	1	4.5	4.5	4.5	60.101	516	516	0.00059773	1.808	1.7245	0.78155	142.02	5	1	Leave out requantified				1.4672
1291	sp|Q15393|SF3B3_HUMAN	sp|Q15393|SF3B3_HUMAN	24	24	24	sp|Q15393|SF3B3_HUMAN Splicing factor 3B subunit 3 OS=Homo sapiens OX=9606 GN=SF3B3 PE=1 SV=4	1	24	24	24	13	7	9	10	11	12	8	13	7	9	10	11	12	8	13	7	9	10	11	12	8	23.1	23.1	23.1	135.58	1217	1217	0	98.821	2.1393	0.91763	38.884	69	22	Leave out requantified	2.404	1.5106	1.9141	2.1281
1292	sp|Q15417|CNN3_HUMAN	sp|Q15417|CNN3_HUMAN	11	11	10	sp|Q15417|CNN3_HUMAN Calponin-3 OS=Homo sapiens OX=9606 GN=CNN3 PE=1 SV=1	1	11	11	10	8	5	7	8	8	8	9	8	5	7	8	8	8	9	7	5	7	7	8	7	9	43.8	43.8	40.4	36.413	329	329	0	46.093	1.7147	0.83698	43.259	64	26	Leave out requantified	2.3199	2.6702	2.0533	2.111
1293	sp|Q15427|SF3B4_HUMAN	sp|Q15427|SF3B4_HUMAN	2	2	2	sp|Q15427|SF3B4_HUMAN Splicing factor 3B subunit 4 OS=Homo sapiens OX=9606 GN=SF3B4 PE=1 SV=1	1	2	2	2	2	1	1	1	1	2	1	2	1	1	1	1	2	1	2	1	1	1	1	2	1	9	9	9	44.385	424	424	0	8.9656	1.7282	0.79691	14.624	8	2	Leave out requantified	1.5732	1.719	0.95868
1294	sp|Q15428|SF3A2_HUMAN	sp|Q15428|SF3A2_HUMAN	4	4	4	sp|Q15428|SF3A2_HUMAN Splicing factor 3A subunit 2 OS=Homo sapiens OX=9606 GN=SF3A2 PE=1 SV=2	1	4	4	4	3	4	4	4	4	3	4	3	4	4	4	4	3	4	3	4	4	4	4	3	4	11	11	11	49.255	464	464	0	18.555	1.8976	0.89659	30.716	26	6	Leave out requantified	1.9588	2.0404	2.3858	2.2016
1295	sp|Q15435|PP1R7_HUMAN	sp|Q15435|PP1R7_HUMAN	3	3	3	sp|Q15435|PP1R7_HUMAN Protein phosphatase 1 regulatory subunit 7 OS=Homo sapiens OX=9606 GN=PPP1R7 PE=1 SV=1	1	3	3	3	1	0	0	1	1	1	2	1	0	0	1	1	1	2	1	0	0	1	1	1	2	14.7	14.7	14.7	41.564	360	360	0	8.8732	3.6388	0.88015	44.59	6	3	Linear	2.2966			2.1509
1296	sp|Q15436|SC23A_HUMAN	sp|Q15436|SC23A_HUMAN	8	8	7	sp|Q15436|SC23A_HUMAN Protein transport protein Sec23A OS=Homo sapiens OX=9606 GN=SEC23A PE=1 SV=2	1	8	8	7	4	1	4	3	4	4	2	4	1	4	3	4	4	2	4	0	3	2	3	3	1	14	14	12.2	86.16	765	765	0	31.724	4.1504	1.7673	23.505	22	14	Leave out requantified	3.5527	4.2286	1.5914	1.9918
1297	sp|Q15437|SC23B_HUMAN	sp|Q15437|SC23B_HUMAN	5	4	4	sp|Q15437|SC23B_HUMAN Protein transport protein Sec23B OS=Homo sapiens OX=9606 GN=SEC23B PE=1 SV=2	1	5	4	4	2	2	3	2	2	3	1	2	1	2	1	1	2	0	2	1	2	1	1	2	0	8.3	6.5	6.5	86.478	767	767	0	3.3254	1.5982	0.69427	40.457	8	8	Median	1.7844	1.8594	1.0099	1.1426
1298	sp|Q15459|SF3A1_HUMAN	sp|Q15459|SF3A1_HUMAN	10	10	10	sp|Q15459|SF3A1_HUMAN Splicing factor 3A subunit 1 OS=Homo sapiens OX=9606 GN=SF3A1 PE=1 SV=1	1	10	10	10	4	6	6	3	2	3	5	4	6	6	3	2	3	5	4	6	6	3	2	3	5	16.3	16.3	16.3	88.885	793	793	0	20.687	1.334	0.57381	24.171	27	2	Leave out requantified	1.6829	1.3415	1.5507	1.3115
1299	sp|Q15599|NHRF2_HUMAN	sp|Q15599|NHRF2_HUMAN	1	1	1	sp|Q15599|NHRF2_HUMAN Na(+)/H(+) exchange regulatory cofactor NHE-RF2 OS=Homo sapiens OX=9606 GN=SLC9A3R2 PE=1 SV=2	1	1	1	1	1	1	1	1	1	0	0	1	1	1	1	1	0	0	1	1	1	1	1	0	0	2.7	2.7	2.7	37.413	337	337	0	1.8392	1.0067	0.41864	46.391	5	5	Median	0.50942	1.3972	1.2611	1.0067
1300	sp|Q15631|TSN_HUMAN	sp|Q15631|TSN_HUMAN	7	7	7	sp|Q15631|TSN_HUMAN Translin OS=Homo sapiens OX=9606 GN=TSN PE=1 SV=1	1	7	7	7	5	6	5	6	5	6	5	5	6	5	6	5	6	5	5	6	5	6	5	6	5	38.2	38.2	38.2	26.183	228	228	0	39.423	1.8589	0.93753	21.258	41	6	Leave out requantified	1.8477	2.0521	1.9358	1.7992
1301	sp|Q15637|SF01_HUMAN	sp|Q15637|SF01_HUMAN	4	4	4	sp|Q15637|SF01_HUMAN Splicing factor 1 OS=Homo sapiens OX=9606 GN=SF1 PE=1 SV=4	1	4	4	4	1	2	3	3	1	2	1	1	2	3	3	1	2	1	1	2	3	3	1	2	1	9.1	9.1	9.1	68.329	639	639	0	2.7221	2.2184	0.99991	35.267	11	10	Median	2.0481	1.4611	1.3515	1.7439
1302	sp|Q15642|CIP4_HUMAN	sp|Q15642|CIP4_HUMAN	5	5	5	sp|Q15642|CIP4_HUMAN Cdc42-interacting protein 4 OS=Homo sapiens OX=9606 GN=TRIP10 PE=1 SV=3	1	5	5	5	2	4	3	3	4	2	2	2	4	3	3	4	2	2	2	4	3	3	4	2	2	10.6	10.6	10.6	68.351	601	601	0	9.6335	2.0898	1.0128	21.26	15	5	Leave out requantified	2.6475	1.7703	2.6012	3.0278
1304	sp|Q15645|PCH2_HUMAN	sp|Q15645|PCH2_HUMAN	1	1	1	sp|Q15645|PCH2_HUMAN Pachytene checkpoint protein 2 homolog OS=Homo sapiens OX=9606 GN=TRIP13 PE=1 SV=2	1	1	1	1	1	0	0	0	1	1	1	1	0	0	0	1	1	1	1	0	0	0	1	1	1	2.3	2.3	2.3	48.55	432	432	0	2.4669	2.92	1.3177	35.64	4	2	Median	3.7264
1306	sp|Q15691|MARE1_HUMAN	sp|Q15691|MARE1_HUMAN	14	14	14	sp|Q15691|MARE1_HUMAN Microtubule-associated protein RP/EB family member 1 OS=Homo sapiens OX=9606 GN=MAPRE1 PE=1 SV=3	1	14	14	14	9	8	12	9	8	7	7	9	8	12	9	8	7	7	9	8	12	9	8	7	7	69	69	69	29.999	268	268	0	88.61	2.2649	1.1081	22.76	69	13	Leave out requantified	2.6927	2.0777	2.5205	2.0481
1307	sp|Q15717|ELAV1_HUMAN;sp|Q12926|ELAV2_HUMAN;sp|P26378|ELAV4_HUMAN	sp|Q15717|ELAV1_HUMAN	8;1;1	8;1;1	8;1;1	sp|Q15717|ELAV1_HUMAN ELAV-like protein 1 OS=Homo sapiens OX=9606 GN=ELAVL1 PE=1 SV=2	3	8	8	8	4	2	6	3	3	3	3	4	2	6	3	3	3	3	4	2	6	3	3	3	3	30.7	30.7	30.7	36.091	326	326;359;385	0	36.674	4.5338	1.6875	18.512	22	4	Leave out requantified	4.1357	4.2394	6.2395	5.22
1308	sp|Q15738|NSDHL_HUMAN	sp|Q15738|NSDHL_HUMAN	10	10	10	sp|Q15738|NSDHL_HUMAN Sterol-4-alpha-carboxylate 3-dehydrogenase, decarboxylating OS=Homo sapiens OX=9606 GN=NSDHL PE=1 SV=2	1	10	10	10	4	10	6	8	5	7	3	4	10	6	8	5	7	3	4	10	6	8	5	7	3	40.5	40.5	40.5	41.9	373	373	0	75.112	2.0607	0.79133	23.772	47	9	Leave out requantified	2.4283	2.2226	2.3268	2.1697
1309	sp|Q15746|MYLK_HUMAN	sp|Q15746|MYLK_HUMAN	1	1	1	sp|Q15746|MYLK_HUMAN Myosin light chain kinase, smooth muscle OS=Homo sapiens OX=9606 GN=MYLK PE=1 SV=4	1	1	1	1	1	1	1	1	1	1	1	1	1	1	1	1	1	1	1	1	1	1	1	1	1	0.4	0.4	0.4	210.71	1914	1914	0.0055804	1.2536	4.9083	1.8104	14.918	7	0	Median	4.9083	4.5808	6.2059	6.403
1310	sp|Q15758|AAAT_HUMAN	sp|Q15758|AAAT_HUMAN	8	8	8	sp|Q15758|AAAT_HUMAN Neutral amino acid transporter B(0) OS=Homo sapiens OX=9606 GN=SLC1A5 PE=1 SV=2	1	8	8	8	4	3	3	1	4	3	3	4	3	3	1	4	3	3	4	3	3	1	4	3	3	20.5	20.5	20.5	56.598	541	541	0	30.348	1.8844	0.72209	38.727	20	8	Leave out requantified	1.8796	0.57208	2.0243	1.8837
1311	sp|Q15785|TOM34_HUMAN	sp|Q15785|TOM34_HUMAN	5	5	5	sp|Q15785|TOM34_HUMAN Mitochondrial import receptor subunit TOM34 OS=Homo sapiens OX=9606 GN=TOMM34 PE=1 SV=2	1	5	5	5	1	3	3	1	3	1	2	1	3	3	1	3	1	2	1	3	3	1	3	1	2	22.7	22.7	22.7	34.559	309	309	0	42.362	2.9997	1.2462	27.222	19	12	Leave out requantified	2.1722	2.3163	3.6569	2.9384
1312	sp|Q15800|MSMO1_HUMAN	sp|Q15800|MSMO1_HUMAN	2	2	2	sp|Q15800|MSMO1_HUMAN Methylsterol monooxygenase 1 OS=Homo sapiens OX=9606 GN=MSMO1 PE=1 SV=1	1	2	2	2	2	2	2	2	2	2	2	2	2	2	2	2	2	2	2	2	2	2	2	2	2	7.2	7.2	7.2	35.215	293	293	0	14.727	2.4191	0.93041	22.484	13	6	Leave out requantified	3.0375	2.3444	2.6831	2.9674
1313	sp|Q15813|TBCE_HUMAN	sp|Q15813|TBCE_HUMAN	3	3	3	sp|Q15813|TBCE_HUMAN Tubulin-specific chaperone E OS=Homo sapiens OX=9606 GN=TBCE PE=1 SV=1	1	3	3	3	0	1	2	1	2	1	1	0	1	2	1	2	1	1	0	1	2	1	2	1	1	8.5	8.5	8.5	59.345	527	527	0	12.299	1.8245	0.76821	75.489	6	5	Median		2.1169	0.43024	3.5494
1315	sp|Q15836|VAMP3_HUMAN;sp|P63027|VAMP2_HUMAN	sp|Q15836|VAMP3_HUMAN;sp|P63027|VAMP2_HUMAN	2;1	2;1	2;1	sp|Q15836|VAMP3_HUMAN Vesicle-associated membrane protein 3 OS=Homo sapiens OX=9606 GN=VAMP3 PE=1 SV=3;sp|P63027|VAMP2_HUMAN Vesicle-associated membrane protein 2 OS=Homo sapiens OX=9606 GN=VAMP2 PE=1 SV=3	2	2	2	2	2	1	2	2	2	2	1	2	1	2	2	2	2	1	2	1	2	2	2	2	1	40	40	40	11.309	100	100;116	0	19.782	1.8807	0.80204	49.408	13	5	Leave out requantified	0.94497	1.1374	2.3382	1.4359
1316	sp|Q15907|RB11B_HUMAN;sp|P62491|RB11A_HUMAN;sp|P57735|RAB25_HUMAN	sp|Q15907|RB11B_HUMAN;sp|P62491|RB11A_HUMAN	12;11;1	12;11;1	12;11;1	sp|Q15907|RB11B_HUMAN Ras-related protein Rab-11B OS=Homo sapiens OX=9606 GN=RAB11B PE=1 SV=4;sp|P62491|RB11A_HUMAN Ras-related protein Rab-11A OS=Homo sapiens OX=9606 GN=RAB11A PE=1 SV=3	3	12	12	12	9	9	11	7	9	9	7	9	9	11	7	9	9	7	9	9	11	7	9	9	7	61	61	61	24.488	218	218;216;213	0	70.95	2.7613	1.0547	14.018	54	14	Leave out requantified	2.6782	2.8423	3.2114	2.6955
1318	sp|Q16181|SEPT7_HUMAN;sp|Q6ZU15|SEP14_HUMAN;sp|O43236|SEPT4_HUMAN	sp|Q16181|SEPT7_HUMAN	17;1;1	17;1;1	17;1;1	sp|Q16181|SEPT7_HUMAN Septin-7 OS=Homo sapiens OX=9606 GN=SEPTIN7 PE=1 SV=2	3	17	17	17	8	10	10	13	10	8	11	8	10	10	13	10	8	11	8	10	10	13	10	8	11	53.3	53.3	53.3	50.679	437	437;432;478	0	92.612	3.2141	1.4421	33.793	80	47	Leave out requantified	3.3087	4.2405	2.8532	3.1752
1319	sp|Q16186|ADRM1_HUMAN	sp|Q16186|ADRM1_HUMAN	5	5	5	sp|Q16186|ADRM1_HUMAN Proteasomal ubiquitin receptor ADRM1 OS=Homo sapiens OX=9606 GN=ADRM1 PE=1 SV=2	1	5	5	5	2	4	2	3	3	3	3	2	4	2	3	3	3	3	2	4	2	3	3	3	3	14.7	14.7	14.7	42.153	407	407	0	23.885	1.7118	0.77391	14.492	20	4	Leave out requantified	2.1231	1.7806	1.9862	1.602
1320	sp|Q16222|UAP1_HUMAN	sp|Q16222|UAP1_HUMAN	6	6	5	sp|Q16222|UAP1_HUMAN UDP-N-acetylhexosamine pyrophosphorylase OS=Homo sapiens OX=9606 GN=UAP1 PE=1 SV=3	1	6	6	5	3	2	4	3	2	1	4	3	2	4	3	2	1	4	2	2	3	3	2	1	3	17.8	17.8	15.3	58.768	522	522	0	23.013	1.9891	0.85567	23.655	18	9	Leave out requantified	1.8852	1.2604	2.4366	1.5648
1321	sp|Q16401|PSMD5_HUMAN	sp|Q16401|PSMD5_HUMAN	10	10	10	sp|Q16401|PSMD5_HUMAN 26S proteasome non-ATPase regulatory subunit 5 OS=Homo sapiens OX=9606 GN=PSMD5 PE=1 SV=3	1	10	10	10	4	4	5	7	8	5	7	4	4	5	7	8	5	7	4	4	5	7	8	5	7	23	23	23	56.195	504	504	0	49.475	3.0092	1.2962	21.664	39	20	Leave out requantified	3.5341	4.3701	3.5023	3.4448
1323	sp|Q16531|DDB1_HUMAN	sp|Q16531|DDB1_HUMAN	39	39	39	sp|Q16531|DDB1_HUMAN DNA damage-binding protein 1 OS=Homo sapiens OX=9606 GN=DDB1 PE=1 SV=1	1	39	39	39	24	32	29	27	31	28	26	24	32	29	27	31	28	26	24	32	29	27	31	28	26	42.2	42.2	42.2	126.97	1140	1140	0	161.52	1.8396	0.83703	27.582	203	22	Leave out requantified	1.9516	1.8885	1.9639	1.8323
1325	sp|Q16539|MK14_HUMAN	sp|Q16539|MK14_HUMAN	4	4	4	sp|Q16539|MK14_HUMAN Mitogen-activated protein kinase 14 OS=Homo sapiens OX=9606 GN=MAPK14 PE=1 SV=3	1	4	4	4	0	1	2	2	1	2	1	0	1	2	2	1	2	1	0	1	2	2	1	2	1	20.3	20.3	20.3	41.293	360	360	0	13.667	2.7635	1.0886	39.664	3	2	Median		2.7635	3.2061
1326	sp|Q16543|CDC37_HUMAN	sp|Q16543|CDC37_HUMAN	13	13	13	sp|Q16543|CDC37_HUMAN Hsp90 co-chaperone Cdc37 OS=Homo sapiens OX=9606 GN=CDC37 PE=1 SV=1	1	13	13	13	6	10	7	9	8	4	7	6	10	7	9	8	4	7	6	10	7	9	8	4	7	37.8	37.8	37.8	44.468	378	378	0	86.606	1.7593	0.73555	34.613	59	8	Leave out requantified	1.8782	1.81	1.5278	1.5869
1327	sp|Q16555|DPYL2_HUMAN;sp|Q14195|DPYL3_HUMAN;sp|Q14194|DPYL1_HUMAN	sp|Q16555|DPYL2_HUMAN	28;4;3	28;4;3	28;4;3	sp|Q16555|DPYL2_HUMAN Dihydropyrimidinase-related protein 2 OS=Homo sapiens OX=9606 GN=DPYSL2 PE=1 SV=1	3	28	28	28	19	20	16	20	18	18	20	19	20	16	20	18	18	20	19	20	16	20	18	18	20	72.2	72.2	72.2	62.293	572	572;570;572	0	260.11	2.5208	1.0533	22.708	149	46	Leave out requantified	2.5986	2.4676	2.8923	2.6713
1328	sp|Q16563|SYPL1_HUMAN	sp|Q16563|SYPL1_HUMAN	1	1	1	sp|Q16563|SYPL1_HUMAN Synaptophysin-like protein 1 OS=Homo sapiens OX=9606 GN=SYPL1 PE=1 SV=1	1	1	1	1	1	1	0	1	0	1	1	1	1	0	1	0	1	1	1	1	0	1	0	1	1	4.2	4.2	4.2	28.565	259	259	0	4.5605	4.8747	2.0435	33.214	5	2	Median	4.6977	7.8791		4.8747
1329	sp|Q16576|RBBP7_HUMAN	sp|Q16576|RBBP7_HUMAN	18	18	11	sp|Q16576|RBBP7_HUMAN Histone-binding protein RBBP7 OS=Homo sapiens OX=9606 GN=RBBP7 PE=1 SV=1	1	18	18	11	9	9	14	13	14	12	11	9	9	14	13	14	12	11	4	6	8	8	10	7	6	72.9	72.9	60.5	47.82	425	425	0	137.15	2.4905	1.0336	17.203	95	27	Leave out requantified	2.641	2.9469	3.1441	2.7607
1330	sp|Q16629|SRSF7_HUMAN	sp|Q16629|SRSF7_HUMAN	4	4	4	sp|Q16629|SRSF7_HUMAN Serine/arginine-rich splicing factor 7 OS=Homo sapiens OX=9606 GN=SRSF7 PE=1 SV=1	1	4	4	4	3	0	2	2	3	2	1	3	0	2	2	3	2	1	3	0	2	2	3	2	1	19.7	19.7	19.7	27.366	238	238	0	12.683	3.9445	1.7742	10.469	13	6	Leave out requantified	2.2468		1.6093	4.3127
1331	sp|Q16630|CPSF6_HUMAN	sp|Q16630|CPSF6_HUMAN	3	3	3	sp|Q16630|CPSF6_HUMAN Cleavage and polyadenylation specificity factor subunit 6 OS=Homo sapiens OX=9606 GN=CPSF6 PE=1 SV=2	1	3	3	3	2	3	1	2	1	3	1	2	3	1	2	1	3	1	2	3	1	2	1	3	1	7.8	7.8	7.8	59.209	551	551	0	16.011	0.95816	0.37244	87.967	10	7	Median	0.61601	3.589		0.62357
1332	sp|Q16658|FSCN1_HUMAN	sp|Q16658|FSCN1_HUMAN	8	8	8	sp|Q16658|FSCN1_HUMAN Fascin OS=Homo sapiens OX=9606 GN=FSCN1 PE=1 SV=3	1	8	8	8	6	6	4	5	5	4	5	6	6	4	5	5	4	5	6	6	4	5	5	4	5	22.3	22.3	22.3	54.529	493	493	0	40.418	2.6456	1.3982	37.866	35	22	Leave out requantified	2.1704	1.8463	1.9517	2.1371
1333	sp|Q16666|IF16_HUMAN	sp|Q16666|IF16_HUMAN	3	3	3	sp|Q16666|IF16_HUMAN Gamma-interferon-inducible protein 16 OS=Homo sapiens OX=9606 GN=IFI16 PE=1 SV=3	1	3	3	3	3	2	1	0	0	1	0	3	2	1	0	0	1	0	3	2	1	0	0	1	0	5.1	5.1	5.1	88.255	785	785	0	3.7632	1.0583	0.53432	4.4712	4	4	Linear	1.0128	1.0256	1.0687
1334	sp|Q16698|DECR_HUMAN	sp|Q16698|DECR_HUMAN	3	3	3	sp|Q16698|DECR_HUMAN 2,4-dienoyl-CoA reductase [(3E)-enoyl-CoA-producing], mitochondrial OS=Homo sapiens OX=9606 GN=DECR1 PE=1 SV=1	1	3	3	3	1	2	2	1	2	3	2	1	2	2	1	2	3	2	1	2	2	1	2	3	2	14.3	14.3	14.3	36.067	335	335	0	12.968	2.0778	0.89168	26.523	13	2	Leave out requantified	2.6721	2.1384	2.1304	2.5927
1336	sp|Q16775|GLO2_HUMAN	sp|Q16775|GLO2_HUMAN	4	4	4	sp|Q16775|GLO2_HUMAN Hydroxyacylglutathione hydrolase, mitochondrial OS=Homo sapiens OX=9606 GN=HAGH PE=1 SV=2	1	4	4	4	0	2	2	2	4	3	1	0	2	2	2	4	3	1	0	2	2	2	4	3	1	14.3	14.3	14.3	33.805	308	308	0	3.3376	3.0219	1.1615	19.55	13	3	Leave out requantified		2.5977	2.4341	2.5601
1338	sp|Q16799|RTN1_HUMAN	sp|Q16799|RTN1_HUMAN	2	2	2	sp|Q16799|RTN1_HUMAN Reticulon-1 OS=Homo sapiens OX=9606 GN=RTN1 PE=1 SV=1	1	2	2	2	2	2	2	1	2	2	1	2	2	2	1	2	2	1	2	2	2	1	2	2	1	2.1	2.1	2.1	83.617	776	776	0	1.896	1.7053	0.80127	20.235	12	5	Leave out requantified	1.8257	1.7501	2.0454	2.3095
1339	sp|Q16822|PCKGM_HUMAN;sp|P35558|PCKGC_HUMAN	sp|Q16822|PCKGM_HUMAN;sp|P35558|PCKGC_HUMAN	2;1	2;1	2;1	sp|Q16822|PCKGM_HUMAN Phosphoenolpyruvate carboxykinase [GTP], mitochondrial OS=Homo sapiens OX=9606 GN=PCK2 PE=1 SV=4;sp|P35558|PCKGC_HUMAN Phosphoenolpyruvate carboxykinase, cytosolic [GTP] OS=Homo sapiens OX=9606 GN=PCK1 PE=1 SV=3	2	2	2	2	1	2	1	0	1	1	0	1	2	1	0	1	1	0	1	2	1	0	1	1	0	2.7	2.7	2.7	70.698	640	640;622	0.0034404	1.4267	0.93645	0.48177	99.461	3	3	Median	0.3586	0.93645	2.4803
1340	sp|Q16836|HCDH_HUMAN	sp|Q16836|HCDH_HUMAN	5	5	5	sp|Q16836|HCDH_HUMAN Hydroxyacyl-coenzyme A dehydrogenase, mitochondrial OS=Homo sapiens OX=9606 GN=HADH PE=1 SV=3	1	5	5	5	4	2	4	2	3	2	3	4	2	4	2	3	2	3	4	2	4	2	3	2	3	17.8	17.8	17.8	34.293	314	314	0	9.4591	2.7589	1.1096	47.548	20	8	Leave out requantified	2.7306	3.0454	2.6409	3.5058
1341	sp|Q16850|CP51A_HUMAN	sp|Q16850|CP51A_HUMAN	6	6	6	sp|Q16850|CP51A_HUMAN Lanosterol 14-alpha demethylase OS=Homo sapiens OX=9606 GN=CYP51A1 PE=1 SV=3	1	6	6	6	1	2	1	0	1	4	3	1	2	1	0	1	4	3	1	2	1	0	1	4	3	16.3	16.3	16.3	56.805	503	503	0	7.9542	2.0738	0.95075	49.642	12	8	Leave out requantified	0.26554	3.126	2.6339
1342	sp|Q16851|UGPA_HUMAN	sp|Q16851|UGPA_HUMAN	8	8	8	sp|Q16851|UGPA_HUMAN UTP--glucose-1-phosphate uridylyltransferase OS=Homo sapiens OX=9606 GN=UGP2 PE=1 SV=5	1	8	8	8	7	4	5	3	5	4	5	7	4	5	3	5	4	5	7	4	5	3	5	4	5	22.2	22.2	22.2	56.94	508	508	0	75.624	1.5267	0.66511	13.848	33	7	Leave out requantified	1.5218	1.5693	1.7644	1.9469
1343	sp|Q16881|TRXR1_HUMAN;sp|Q9NNW7|TRXR2_HUMAN	sp|Q16881|TRXR1_HUMAN	18;1	18;1	18;1	sp|Q16881|TRXR1_HUMAN Thioredoxin reductase 1, cytoplasmic OS=Homo sapiens OX=9606 GN=TXNRD1 PE=1 SV=3	2	18	18	18	15	14	12	15	15	16	13	15	14	12	15	15	16	13	15	14	12	15	15	16	13	40.5	40.5	40.5	70.905	649	649;524	0	175.96	2.3071	1.0604	33.285	109	48	Leave out requantified	2.1782	2.314	2.7748	2.0929
1345	sp|Q1KMD3|HNRL2_HUMAN	sp|Q1KMD3|HNRL2_HUMAN	12	12	12	sp|Q1KMD3|HNRL2_HUMAN Heterogeneous nuclear ribonucleoprotein U-like protein 2 OS=Homo sapiens OX=9606 GN=HNRNPUL2 PE=1 SV=1	1	12	12	12	7	4	4	6	6	5	5	7	4	4	6	6	5	5	7	4	4	6	6	5	5	22.5	22.5	22.5	85.104	747	747	0	58.093	3.7067	1.7565	61.782	34	23	Leave out requantified	4.8061	2.3519	1.5593	2.7805
1348	sp|Q2TAY7|SMU1_HUMAN	sp|Q2TAY7|SMU1_HUMAN	1	1	1	sp|Q2TAY7|SMU1_HUMAN WD40 repeat-containing protein SMU1 OS=Homo sapiens OX=9606 GN=SMU1 PE=1 SV=2	1	1	1	1	0	1	1	0	1	0	0	0	1	1	0	1	0	0	0	1	1	0	1	0	0	1.9	1.9	1.9	57.543	513	513	0.0005963	1.7849	4.043	1.5048	25.037	3	3	Median		4.2072	2.9296
1349	sp|Q32MZ4|LRRF1_HUMAN;sp|Q9Y608|LRRF2_HUMAN	sp|Q32MZ4|LRRF1_HUMAN	8;1	8;1	8;1	sp|Q32MZ4|LRRF1_HUMAN Leucine-rich repeat flightless-interacting protein 1 OS=Homo sapiens OX=9606 GN=LRRFIP1 PE=1 SV=2	2	8	8	8	4	4	6	4	4	1	3	4	4	6	4	4	1	3	4	4	6	4	4	1	3	14.6	14.6	14.6	89.252	808	808;721	0	21.246	1.4513	0.76873	19.899	27	14	Leave out requantified	1.9246	1.9256	1.5441	1.3591
1350	sp|Q32P28|P3H1_HUMAN	sp|Q32P28|P3H1_HUMAN	5	5	5	sp|Q32P28|P3H1_HUMAN Prolyl 3-hydroxylase 1 OS=Homo sapiens OX=9606 GN=P3H1 PE=1 SV=2	1	5	5	5	2	4	2	1	3	3	2	2	4	2	1	3	3	2	2	4	2	1	3	3	2	8.7	8.7	8.7	83.393	736	736	0	14.147	2.9887	1.2879	56.245	14	11	Median	2.3415	2.8375	3.5075	3.3954
1351	sp|Q3KQV9|UAP1L_HUMAN	sp|Q3KQV9|UAP1L_HUMAN	4	3	3	sp|Q3KQV9|UAP1L_HUMAN UDP-N-acetylhexosamine pyrophosphorylase-like protein 1 OS=Homo sapiens OX=9606 GN=UAP1L1 PE=1 SV=2	1	4	3	3	2	2	2	2	1	1	3	1	2	1	2	1	1	2	1	2	1	2	1	1	2	7.1	4.5	4.5	57.03	507	507	0.0055218	1.1611	2.8091	1.2017	76.641	10	7	Median	2.0143	0.97775	3.2081	3.7937
1354	sp|Q3ZCM7|TBB8_HUMAN	sp|Q3ZCM7|TBB8_HUMAN	11	2	2	sp|Q3ZCM7|TBB8_HUMAN Tubulin beta-8 chain OS=Homo sapiens OX=9606 GN=TUBB8 PE=1 SV=2	1	11	2	2	11	11	11	11	11	11	11	2	2	2	2	2	2	2	2	2	2	2	2	2	2	24.5	7.4	7.4	49.775	444	444	0	148.09	7.0821	4.0899	10.301	20	5	Leave out requantified	6.9288	7.1284	8.7773	8.6307
1358	sp|Q52LW3|RHG29_HUMAN	sp|Q52LW3|RHG29_HUMAN	2	2	2	sp|Q52LW3|RHG29_HUMAN Rho GTPase-activating protein 29 OS=Homo sapiens OX=9606 GN=ARHGAP29 PE=1 SV=2	1	2	2	2	1	0	0	1	1	1	0	1	0	0	1	1	1	0	1	0	0	1	1	1	0	1.6	1.6	1.6	142.06	1261	1261	0	2.3284	0.0084064	0.0048198	191.66	4	4	Median	0.0055856			0.0099927
1359	sp|Q53GQ0|DHB12_HUMAN	sp|Q53GQ0|DHB12_HUMAN	8	8	8	sp|Q53GQ0|DHB12_HUMAN Very-long-chain 3-oxoacyl-CoA reductase OS=Homo sapiens OX=9606 GN=HSD17B12 PE=1 SV=2	1	8	8	8	5	3	4	2	2	6	2	5	3	4	2	2	6	2	5	3	4	2	2	6	2	33.3	33.3	33.3	34.324	312	312	0	45.918	4.2858	1.6652	24.085	25	14	Leave out requantified	3.2866	4.9193	7.2575	3.2311
1362	sp|Q56VL3|OCAD2_HUMAN	sp|Q56VL3|OCAD2_HUMAN	2	2	2	sp|Q56VL3|OCAD2_HUMAN OCIA domain-containing protein 2 OS=Homo sapiens OX=9606 GN=OCIAD2 PE=1 SV=1	1	2	2	2	1	2	1	1	0	0	1	1	2	1	1	0	0	1	1	2	1	1	0	0	1	14.3	14.3	14.3	16.953	154	154	0	8.9342	2.9643	1.1505	9.2941	6	0	Leave out requantified	2.7547	3.1154	2.9222	2.7177
1363	sp|Q58FF6|H90B4_HUMAN	sp|Q58FF6|H90B4_HUMAN	9	2	2	sp|Q58FF6|H90B4_HUMAN Putative heat shock protein HSP 90-beta 4 OS=Homo sapiens OX=9606 GN=HSP90AB4P PE=5 SV=1	1	9	2	2	8	8	6	7	7	8	7	1	1	0	0	1	2	1	1	1	0	0	1	2	1	11.9	2.4	2.4	58.264	505	505	0	6.7881	1.3272	0.63254	25.209	6	0	Leave out requantified	1.7201	1.7483
1364	sp|Q58FF8|H90B2_HUMAN	sp|Q58FF8|H90B2_HUMAN	16	2	2	sp|Q58FF8|H90B2_HUMAN Putative heat shock protein HSP 90-beta 2 OS=Homo sapiens OX=9606 GN=HSP90AB2P PE=1 SV=2	1	16	2	2	14	14	15	15	14	13	14	2	2	2	2	2	2	2	2	2	2	2	2	2	2	28.3	4.5	4.5	44.348	381	381	0	79.755	1.6133	0.76689	2.6937	24	1	Leave out requantified	1.6867	1.543	1.7088	1.638
1365	sp|Q5BJF2|SGMR2_HUMAN	sp|Q5BJF2|SGMR2_HUMAN	2	2	2	sp|Q5BJF2|SGMR2_HUMAN Sigma intracellular receptor 2 OS=Homo sapiens OX=9606 GN=TMEM97 PE=1 SV=1	1	2	2	2	1	0	1	1	1	1	0	1	0	1	1	1	1	0	1	0	1	1	1	1	0	10.2	10.2	10.2	20.848	176	176	0.0065681	1.0965	0.78899	0.2703	73.958	5	4	Median	0.78899		0.59323	0.80978
1367	sp|Q5GLZ8|HERC4_HUMAN	sp|Q5GLZ8|HERC4_HUMAN	5	5	5	sp|Q5GLZ8|HERC4_HUMAN Probable E3 ubiquitin-protein ligase HERC4 OS=Homo sapiens OX=9606 GN=HERC4 PE=1 SV=1	1	5	5	5	1	1	0	1	2	3	0	1	1	0	1	2	3	0	1	1	0	1	2	3	0	6.4	6.4	6.4	118.56	1057	1057	0	7.5582	1.4986	0.63104	52.745	7	5	Median	1.3708	0.57019		2.2054
1369	sp|Q5JRX3|PREP_HUMAN	sp|Q5JRX3|PREP_HUMAN	8	8	8	sp|Q5JRX3|PREP_HUMAN Presequence protease, mitochondrial OS=Homo sapiens OX=9606 GN=PITRM1 PE=1 SV=3	1	8	8	8	3	2	2	2	4	3	2	3	2	2	2	4	3	2	3	2	2	2	4	3	2	9.6	9.6	9.6	117.41	1037	1037	0	15.694	2.5396	1.2585	31.232	14	11	Leave out requantified	1.0963	2.7536	1.5757	0.69247
1370	sp|Q5JSH3|WDR44_HUMAN	sp|Q5JSH3|WDR44_HUMAN	1	1	1	sp|Q5JSH3|WDR44_HUMAN WD repeat-containing protein 44 OS=Homo sapiens OX=9606 GN=WDR44 PE=1 SV=1	1	1	1	1	1	1	1	1	1	1	1	1	1	1	1	1	1	1	1	1	1	1	1	1	1	1.3	1.3	1.3	101.37	913	913	0	4.9182	2.199	0.85443	14.072	7	3	Median	2.3075	1.764	2.199	1.7621
1371	sp|Q5JTV8|TOIP1_HUMAN	sp|Q5JTV8|TOIP1_HUMAN	3	3	3	sp|Q5JTV8|TOIP1_HUMAN Torsin-1A-interacting protein 1 OS=Homo sapiens OX=9606 GN=TOR1AIP1 PE=1 SV=2	1	3	3	3	2	1	0	1	2	1	0	2	1	0	1	2	1	0	2	1	0	1	2	1	0	5.8	5.8	5.8	66.248	583	583	0.00059242	1.7365	0.80737	0.29131	112.93	7	2	Median	0.433	0.2277		2.5449
1374	sp|Q5SSJ5|HP1B3_HUMAN	sp|Q5SSJ5|HP1B3_HUMAN	3	3	3	sp|Q5SSJ5|HP1B3_HUMAN Heterochromatin protein 1-binding protein 3 OS=Homo sapiens OX=9606 GN=HP1BP3 PE=1 SV=1	1	3	3	3	1	3	0	1	1	1	1	1	3	0	1	1	1	1	1	3	0	1	1	1	1	6.3	6.3	6.3	61.206	553	553	0	6.343	2.3508	1.1323	47.523	4	4	Median	2.8337	1.7119
1375	sp|Q5T447|HECD3_HUMAN	sp|Q5T447|HECD3_HUMAN	1	1	1	sp|Q5T447|HECD3_HUMAN E3 ubiquitin-protein ligase HECTD3 OS=Homo sapiens OX=9606 GN=HECTD3 PE=1 SV=1	1	1	1	1	0	1	0	0	1	1	1	0	1	0	0	1	1	1	0	1	0	0	1	1	1	1.4	1.4	1.4	97.112	861	861	0	2.953	1.2563	1.24	7.9216	4	0	Median		1.3289
1376	sp|Q5T4S7|UBR4_HUMAN	sp|Q5T4S7|UBR4_HUMAN	10	10	10	sp|Q5T4S7|UBR4_HUMAN E3 ubiquitin-protein ligase UBR4 OS=Homo sapiens OX=9606 GN=UBR4 PE=1 SV=1	1	10	10	10	5	3	4	4	3	1	3	5	3	4	4	3	1	3	5	3	4	4	3	1	3	2.5	2.5	2.5	573.83	5183	5183	0	22.674	2.4161	1.0412	152.84	18	17	Median	2.3213	1.4205	1.3746	3.5044
1377	sp|Q5T653|RM02_HUMAN	sp|Q5T653|RM02_HUMAN	2	2	2	sp|Q5T653|RM02_HUMAN 39S ribosomal protein L2, mitochondrial OS=Homo sapiens OX=9606 GN=MRPL2 PE=1 SV=2	1	2	2	2	0	0	1	0	1	1	0	0	0	1	0	1	1	0	0	0	1	0	1	1	0	10.5	10.5	10.5	33.3	305	305	0	10.858	1.4255	0.52221	105.14	3	2	Median			1.4255
1378	sp|Q5T6V5|QSPP_HUMAN	sp|Q5T6V5|QSPP_HUMAN	2	2	2	sp|Q5T6V5|QSPP_HUMAN Queuosine salvage protein OS=Homo sapiens OX=9606 GN=C9orf64 PE=1 SV=1	1	2	2	2	1	0	1	1	1	1	1	1	0	1	1	1	1	1	1	0	1	1	1	1	1	7.3	7.3	7.3	39.028	341	341	0	4.3329	2.3082	1.0144	35.516	3	3	Plateau			1.4375
1379	sp|Q5T749|KPRP_HUMAN	sp|Q5T749|KPRP_HUMAN	2	2	2	sp|Q5T749|KPRP_HUMAN Keratinocyte proline-rich protein OS=Homo sapiens OX=9606 GN=KPRP PE=1 SV=1	1	2	2	2	1	0	0	2	1	0	0	1	0	0	2	1	0	0	1	0	0	2	1	0	0	2.8	2.8	2.8	64.135	579	579	0.0096308	0.98771	0.13103	0.092907	41.545	3	3	Median	0.13103			0.12031
1381	sp|Q5VTB9|RN220_HUMAN	sp|Q5VTB9|RN220_HUMAN	1	1	1	sp|Q5VTB9|RN220_HUMAN E3 ubiquitin-protein ligase RNF220 OS=Homo sapiens OX=9606 GN=RNF220 PE=1 SV=1	1	1	1	1	0	1	0	1	1	1	0	0	1	0	1	1	1	0	0	1	0	1	1	1	0	1.6	1.6	1.6	62.765	566	566	0.0065431	1.0866	2.7821	1.1583	7.3659	4	0	Median		2.5953		3.0531
1382	sp|Q5VYK3|ECM29_HUMAN	sp|Q5VYK3|ECM29_HUMAN	8	8	8	sp|Q5VYK3|ECM29_HUMAN Proteasome adapter and scaffold protein ECM29 OS=Homo sapiens OX=9606 GN=ECPAS PE=1 SV=2	1	8	8	8	6	5	3	1	4	2	2	6	5	3	1	4	2	2	6	5	3	1	4	2	2	5.1	5.1	5.1	204.29	1845	1845	0	9.8287	2.9831	1.3196	54.668	22	20	Median	4.0434	1.8711	1.6568	4.5944
1384	sp|Q6DD88|ATLA3_HUMAN	sp|Q6DD88|ATLA3_HUMAN	15	15	15	sp|Q6DD88|ATLA3_HUMAN Atlastin-3 OS=Homo sapiens OX=9606 GN=ATL3 PE=1 SV=1	1	15	15	15	7	9	11	12	6	7	9	7	9	11	12	6	7	9	7	9	11	12	6	7	9	42.5	42.5	42.5	60.541	541	541	0	151.29	3.5153	1.5742	22.465	62	23	Leave out requantified	4.0715	3.5695	4.7106	3.6904
1385	sp|Q6DKJ4|NXN_HUMAN	sp|Q6DKJ4|NXN_HUMAN	2	2	2	sp|Q6DKJ4|NXN_HUMAN Nucleoredoxin OS=Homo sapiens OX=9606 GN=NXN PE=1 SV=2	1	2	2	2	2	1	0	1	1	1	1	2	1	0	1	1	1	1	2	1	0	1	1	1	1	9.2	9.2	9.2	48.392	435	435	0	2.6756	2.0268	1.0996	48.796	7	0	Leave out requantified	2.0464	1.009		1.2574
1386	sp|Q6IBS0|TWF2_HUMAN	sp|Q6IBS0|TWF2_HUMAN	8	8	7	sp|Q6IBS0|TWF2_HUMAN Twinfilin-2 OS=Homo sapiens OX=9606 GN=TWF2 PE=1 SV=2	1	8	8	7	3	6	6	6	6	6	3	3	6	6	6	6	6	3	2	5	5	5	5	5	2	35.5	35.5	33.5	39.548	349	349	0	59.846	1.8212	0.92927	33.198	36	14	Leave out requantified	2.5433	2.1449	3.3373	2.3966
1387	sp|Q6IN85|P4R3A_HUMAN	sp|Q6IN85|P4R3A_HUMAN	1	1	1	sp|Q6IN85|P4R3A_HUMAN Serine/threonine-protein phosphatase 4 regulatory subunit 3A OS=Homo sapiens OX=9606 GN=PPP4R3A PE=1 SV=1	1	1	1	1	1	1	1	0	0	1	0	1	1	1	0	0	1	0	1	1	1	0	0	1	0	1.4	1.4	1.4	95.367	833	833	0	2.3918	0.20839	0.080654	36.703	4	4	Median	0.18995	0.2124	0.20446
1388	sp|Q6L8Q7|PDE12_HUMAN	sp|Q6L8Q7|PDE12_HUMAN	4	4	4	sp|Q6L8Q7|PDE12_HUMAN 2,5-phosphodiesterase 12 OS=Homo sapiens OX=9606 GN=PDE12 PE=1 SV=2	1	4	4	4	1	1	1	2	2	1	3	1	1	1	2	2	1	3	1	1	1	2	2	1	3	11	11	11	67.351	609	609	0	5.8484	1.6006	0.69723	21.683	10	5	Leave out requantified	1.8205	1.6006	1.4	1.2823
1389	sp|Q6NUK1|SCMC1_HUMAN	sp|Q6NUK1|SCMC1_HUMAN	8	8	8	sp|Q6NUK1|SCMC1_HUMAN Calcium-binding mitochondrial carrier protein SCaMC-1 OS=Homo sapiens OX=9606 GN=SLC25A24 PE=1 SV=2	1	8	8	8	2	3	4	3	5	4	2	2	3	4	3	5	4	2	2	3	4	3	5	4	2	18.7	18.7	18.7	53.354	477	477	0	6.2948	3.2354	1.436	1.7953	21	17	Leave out requantified	1.6665	4.3036	2.2735	1.9865
1392	sp|Q6NZI2|CAVN1_HUMAN	sp|Q6NZI2|CAVN1_HUMAN	13	13	13	sp|Q6NZI2|CAVN1_HUMAN Caveolae-associated protein 1 OS=Homo sapiens OX=9606 GN=CAVIN1 PE=1 SV=1	1	13	13	13	9	9	10	8	7	8	9	9	9	10	8	7	8	9	9	9	10	8	7	8	9	37.9	37.9	37.9	43.476	390	390	0	119.06	3.8479	1.9347	34.32	65	14	Leave out requantified	4.0735	4.6062	5.1051	4.9933
1394	sp|Q6P1M0|S27A4_HUMAN	sp|Q6P1M0|S27A4_HUMAN	3	3	3	sp|Q6P1M0|S27A4_HUMAN Long-chain fatty acid transport protein 4 OS=Homo sapiens OX=9606 GN=SLC27A4 PE=1 SV=1	1	3	3	3	1	1	1	1	1	2	1	1	1	1	1	1	2	1	1	1	1	1	1	2	1	4.5	4.5	4.5	72.063	643	643	0	3.207	2.2806	0.95783	5.8724	5	5	Median		2.2806	2.3263
1395	sp|Q6P2Q9|PRP8_HUMAN	sp|Q6P2Q9|PRP8_HUMAN	12	12	12	sp|Q6P2Q9|PRP8_HUMAN Pre-mRNA-processing-splicing factor 8 OS=Homo sapiens OX=9606 GN=PRPF8 PE=1 SV=2	1	12	12	12	4	8	7	7	6	5	5	4	8	7	7	6	5	5	4	8	7	7	6	5	5	6.3	6.3	6.3	273.6	2335	2335	0	16.625	3.0626	1.2051	74.964	41	30	Leave out requantified	1.6627	1.6517	2.0513	1.4718
1398	sp|Q6PIU2|NCEH1_HUMAN	sp|Q6PIU2|NCEH1_HUMAN	11	11	11	sp|Q6PIU2|NCEH1_HUMAN Neutral cholesterol ester hydrolase 1 OS=Homo sapiens OX=9606 GN=NCEH1 PE=1 SV=3	1	11	11	11	8	7	8	10	8	8	9	8	7	8	10	8	8	9	8	7	8	10	8	8	9	32.4	32.4	32.4	45.807	408	408	0	47.463	1.7938	0.80594	24.079	70	8	Leave out requantified	1.8581	1.8072	2.5943	1.9423
1401	sp|Q6UW68|TM205_HUMAN	sp|Q6UW68|TM205_HUMAN	2	2	2	sp|Q6UW68|TM205_HUMAN Transmembrane protein 205 OS=Homo sapiens OX=9606 GN=TMEM205 PE=1 SV=1	1	2	2	2	1	2	1	0	1	0	0	1	2	1	0	1	0	0	1	2	1	0	1	0	0	13.8	13.8	13.8	21.198	189	189	0	1.821	2.2431	0.94141	47.467	5	2	Median	2.2431	1.333	2.261
1402	sp|Q6UXN9|WDR82_HUMAN	sp|Q6UXN9|WDR82_HUMAN	2	2	2	sp|Q6UXN9|WDR82_HUMAN WD repeat-containing protein 82 OS=Homo sapiens OX=9606 GN=WDR82 PE=1 SV=1	1	2	2	2	0	1	1	2	0	1	0	0	1	1	2	0	1	0	0	1	1	2	0	1	0	7.3	7.3	7.3	35.079	313	313	0	4.7424	1.6146	0.62765	13.045	4	4	Median		1.8937	1.6892	1.5434
1403	sp|Q6VY07|PACS1_HUMAN	sp|Q6VY07|PACS1_HUMAN	2	2	2	sp|Q6VY07|PACS1_HUMAN Phosphofurin acidic cluster sorting protein 1 OS=Homo sapiens OX=9606 GN=PACS1 PE=1 SV=2	1	2	2	2	1	1	0	0	0	0	1	1	1	0	0	0	0	1	1	1	0	0	0	0	1	3.6	3.6	3.6	104.9	963	963	0.0011716	1.6165	1.6887	1.015	104.95	3	2	Plateau	0.51356	1.6887
1404	sp|Q6YN16|HSDL2_HUMAN	sp|Q6YN16|HSDL2_HUMAN	5	5	5	sp|Q6YN16|HSDL2_HUMAN Hydroxysteroid dehydrogenase-like protein 2 OS=Homo sapiens OX=9606 GN=HSDL2 PE=1 SV=1	1	5	5	5	2	2	2	2	1	0	1	2	2	2	2	1	0	1	2	2	2	2	1	0	1	18.4	18.4	18.4	45.394	418	418	0	19.795	6.3969	2.5028	81.429	9	7	Linear	3.3114	1.0291	2.2469	0.85399
1405	sp|Q6ZRP7|QSOX2_HUMAN	sp|Q6ZRP7|QSOX2_HUMAN	1	1	1	sp|Q6ZRP7|QSOX2_HUMAN Sulfhydryl oxidase 2 OS=Homo sapiens OX=9606 GN=QSOX2 PE=1 SV=3	1	1	1	1	1	1	1	0	0	1	0	1	1	1	0	0	1	0	1	1	1	0	0	1	0	2.1	2.1	2.1	77.528	698	698	0	5.1112	2.6657	1.1421	24.299	4	1	Median	3.0242	1.9076	3.6907
1407	sp|Q70UQ0|IKIP_HUMAN	sp|Q70UQ0|IKIP_HUMAN	2	2	2	sp|Q70UQ0|IKIP_HUMAN Inhibitor of nuclear factor kappa-B kinase-interacting protein OS=Homo sapiens OX=9606 GN=IKBIP PE=1 SV=1	1	2	2	2	0	2	1	1	1	1	1	0	2	1	1	1	1	1	0	2	1	1	1	1	1	6.9	6.9	6.9	39.309	350	350	0	8.5615	0.13046	0.063628	123.11	7	6	Median		0.28496	0.11068	2.1683
1408	sp|Q71U36|TBA1A_HUMAN;sp|P0DPH8|TBA3D_HUMAN;sp|P0DPH7|TBA3C_HUMAN;sp|Q6PEY2|TBA3E_HUMAN	sp|Q71U36|TBA1A_HUMAN;sp|P0DPH8|TBA3D_HUMAN;sp|P0DPH7|TBA3C_HUMAN	31;22;22;15	2;2;2;2	1;1;1;1	sp|Q71U36|TBA1A_HUMAN Tubulin alpha-1A chain OS=Homo sapiens OX=9606 GN=TUBA1A PE=1 SV=1;sp|P0DPH8|TBA3D_HUMAN Tubulin alpha-3D chain OS=Homo sapiens OX=9606 GN=TUBA3D PE=1 SV=1;sp|P0DPH7|TBA3C_HUMAN Tubulin alpha-3C chain OS=Homo sapiens OX=9606 GN=TUBA3C	4	31	2	1	26	27	27	26	29	28	27	2	2	2	1	2	2	2	1	1	1	1	1	1	1	81.8	6	3.1	50.135	451	451;450;450;450	0	23.666	6.0438	2.512	21.431	20	8	Median	5.5807	6.0182	7.109	6.3865
1409	sp|Q7KZF4|SND1_HUMAN	sp|Q7KZF4|SND1_HUMAN	27	27	27	sp|Q7KZF4|SND1_HUMAN Staphylococcal nuclease domain-containing protein 1 OS=Homo sapiens OX=9606 GN=SND1 PE=1 SV=1	1	27	27	27	10	13	12	14	19	16	14	10	13	12	14	19	16	14	10	13	12	14	19	16	14	43	43	43	102	910	910	0	165.23	3.2683	1.4539	41.484	106	63	Leave out requantified	3.1553	4.0454	3.9379	3.0047
1410	sp|Q7L014|DDX46_HUMAN	sp|Q7L014|DDX46_HUMAN	6	6	6	sp|Q7L014|DDX46_HUMAN Probable ATP-dependent RNA helicase DDX46 OS=Homo sapiens OX=9606 GN=DDX46 PE=1 SV=2	1	6	6	6	2	2	5	2	4	2	1	2	2	5	2	4	2	1	2	2	5	2	4	2	1	5.8	5.8	5.8	117.36	1031	1031	0	8.0677	4.2819	2.1088	106.03	11	8	Median	0.88383	4.752	4.4338
1412	sp|Q7L1Q6|BZW1_HUMAN	sp|Q7L1Q6|BZW1_HUMAN	8	8	7	sp|Q7L1Q6|BZW1_HUMAN Basic leucine zipper and W2 domain-containing protein 1 OS=Homo sapiens OX=9606 GN=BZW1 PE=1 SV=1	1	8	8	7	5	6	4	5	5	5	3	5	6	4	5	5	5	3	4	5	3	4	4	4	2	17.4	17.4	15.8	48.043	419	419	0	11.397	3.9744	1.7932	20.335	35	14	Leave out requantified	3.7714	3.6119	4.8	3.6178
1413	sp|Q7L2E3|DHX30_HUMAN	sp|Q7L2E3|DHX30_HUMAN	3	3	3	sp|Q7L2E3|DHX30_HUMAN ATP-dependent RNA helicase DHX30 OS=Homo sapiens OX=9606 GN=DHX30 PE=1 SV=1	1	3	3	3	1	2	1	1	1	1	0	1	2	1	1	1	1	0	1	2	1	1	1	1	0	2.2	2.2	2.2	133.94	1194	1194	0	2.1287	2.3956	1.286	34.12	5	4	Median		3.0055	2.3956	5.254
1414	sp|Q7L2H7|EIF3M_HUMAN	sp|Q7L2H7|EIF3M_HUMAN	13	13	13	sp|Q7L2H7|EIF3M_HUMAN Eukaryotic translation initiation factor 3 subunit M OS=Homo sapiens OX=9606 GN=EIF3M PE=1 SV=1	1	13	13	13	8	8	8	7	9	8	9	8	8	8	7	9	8	9	8	8	8	7	9	8	9	41.7	41.7	41.7	42.502	374	374	0	135.65	3.1424	1.4756	29.962	73	28	Leave out requantified	3.4661	2.9082	2.8085	3.4054
1415	sp|Q7L576|CYFP1_HUMAN;sp|Q96F07|CYFP2_HUMAN	sp|Q7L576|CYFP1_HUMAN	9;4	9;4	9;4	sp|Q7L576|CYFP1_HUMAN Cytoplasmic FMR1-interacting protein 1 OS=Homo sapiens OX=9606 GN=CYFIP1 PE=1 SV=1	2	9	9	9	5	4	5	3	2	1	2	5	4	5	3	2	1	2	5	4	5	3	2	1	2	8.3	8.3	8.3	145.18	1253	1253;1278	0	18.17	3.7481	1.3886	57.547	18	14	Leave out requantified	4.4165	1.8684	3.1858	0.94163
1417	sp|Q7L5N1|CSN6_HUMAN	sp|Q7L5N1|CSN6_HUMAN	3	3	3	sp|Q7L5N1|CSN6_HUMAN COP9 signalosome complex subunit 6 OS=Homo sapiens OX=9606 GN=COPS6 PE=1 SV=1	1	3	3	3	2	2	2	1	2	2	2	2	2	2	1	2	2	2	2	2	2	1	2	2	2	13.8	13.8	13.8	36.163	327	327	0	8.9224	1.973	0.94077	17.092	13	5	Leave out requantified	1.8276	1.8175	1.9503	1.7509
1419	sp|Q7Z406|MYH14_HUMAN	sp|Q7Z406|MYH14_HUMAN	8	1	1	sp|Q7Z406|MYH14_HUMAN Myosin-14 OS=Homo sapiens OX=9606 GN=MYH14 PE=1 SV=2	1	8	1	1	7	6	4	4	4	4	4	1	1	0	1	0	0	1	1	1	0	1	0	0	1	3.9	0.6	0.6	227.87	1995	1995	0	2.4506	2.3404	0.90287	72.286	4	3	Median	1.5077	3.6329		1.0574
1421	sp|Q7Z478|DHX29_HUMAN	sp|Q7Z478|DHX29_HUMAN	2	2	2	sp|Q7Z478|DHX29_HUMAN ATP-dependent RNA helicase DHX29 OS=Homo sapiens OX=9606 GN=DHX29 PE=1 SV=2	1	2	2	2	1	1	1	0	1	1	0	1	1	1	0	1	1	0	1	1	1	0	1	1	0	1.6	1.6	1.6	155.23	1369	1369	0.0023148	1.5125	1.5319	0.70816	15.651	4	4	Median	1.5356	1.4156	1.7092
1422	sp|Q7Z4H8|PLGT3_HUMAN	sp|Q7Z4H8|PLGT3_HUMAN	8	8	8	sp|Q7Z4H8|PLGT3_HUMAN Protein O-glucosyltransferase 3 OS=Homo sapiens OX=9606 GN=POGLUT3 PE=1 SV=2	1	8	8	8	4	6	5	5	4	5	3	4	6	5	5	4	5	3	4	6	5	5	4	5	3	20.3	20.3	20.3	58.572	507	507	0	52.98	1.5615	0.61098	28.718	30	8	Leave out requantified	1.5615	1.7776	1.5617	1.569
1424	sp|Q7Z6Z7|HUWE1_HUMAN;sp|A5YM72|CRNS1_HUMAN	sp|Q7Z6Z7|HUWE1_HUMAN	63;1	63;1	63;1	sp|Q7Z6Z7|HUWE1_HUMAN E3 ubiquitin-protein ligase HUWE1 OS=Homo sapiens OX=9606 GN=HUWE1 PE=1 SV=3	2	63	63	63	31	41	33	37	34	39	33	31	41	33	37	34	39	33	31	41	33	37	34	39	33	19.8	19.8	19.8	481.89	4374	4374;827	0	323.31	1.1563	0.51219	32.041	242	49	Leave out requantified	1.3034	1.1338	1.3636	1.1519
1426	sp|Q86TI2|DPP9_HUMAN	sp|Q86TI2|DPP9_HUMAN	4	4	4	sp|Q86TI2|DPP9_HUMAN Dipeptidyl peptidase 9 OS=Homo sapiens OX=9606 GN=DPP9 PE=1 SV=3	1	4	4	4	1	3	2	1	2	2	2	1	3	2	1	2	2	2	1	3	2	1	2	2	2	5.2	5.2	5.2	98.262	863	863	0	7.9911	1.6622	0.82495	28.506	11	8	Median	2.7227	1.4086	1.926
[truncated: 384 more rows]
[truncated: 89 more columns]

## Sheet: ContaminantReverseHitFiltered
	Fasta headers	Peptides	Sequence coverage [%]	Score	Ratio H/L 1	Ratio H/L 2	Ratio H/L 3	Ratio H/L 4	Ratio H/L 5	Ratio H/L 6	Ratio H/L 7	H/L 1 imputed	H/L 2 imputed	H/L 3 imputed	H/L 4 imputed	H/L 5 imputed	H/L 6 imputed	H/L 7 imputed	Imputed Average	Log2 Imputed H/L	P-Value	-Log10 P-value	GO Localization	GO Function	GO Process	Domains	Repeats
[truncated: 1,555 more rows]

[truncated: 3 more sheets: SecondaryFiltering_Score_FoldCh, DomainAnnotatedProteins, Clustered_Top10Domains]
